# Supplementary material for: Genome-Wide Study of the Tomato SlMLO Gene Family and Its Functional Characterization in Response to the Powdery Mildew Fungus Oidium neolycopersici
Source: PubMed Central journal article supplement (PMC4986958; doi:10.3389/fpls.2016.00380), 2016-04-06
Supplement: DataSheet1.pdf [file DataSheet1.pdf]

```

gDNA_Solyc04g049090 GACTTATTGT TTGAAACTTG CAACTACAAT TCTTCTTTAT CATCATTGGA 50
cDNA_Solyc04g049090 GACTTATTGT TTGAAACTTG CAACTACAAT TCTTCTTTAT CATCATTGGA 50
SIMLO1_LEAF -----
SIMLO1_ROOT -----
SIMLO1_FLOWER -----

gDNA_Solyc04g049090 CATTTCCCCT TCTTCTTATT CCTATTTTTA TTTAAATATA GGAATATTTT 100
cDNA_Solyc04g049090 CATTTCCCCT TCTTCTTATT CCTATTTTTA TTTAAATATA GGAATATTTT 100
SIMLO1_LEAF -----
SIMLO1_ROOT -----
SIMLO1_FLOWER -----

gDNA_Solyc04g049090 TTTCAAAGGA AGAAAATATA TATTTTCCTTC AACACCACTA TATATAGACT 150
cDNA_Solyc04g049090 TTTCAAAGGA AGAAAATATA TATTTTCCTTC AACACCACTA TATATAGACT 150
SIMLO1_LEAF -----
SIMLO1_ROOT -----
SIMLO1_FLOWER -----

gDNA_Solyc04g049090 TAATTCATA ATCCTGTTAA TTTAATTGAT GGCTAAAGAA CGGTCTATGG 200
cDNA_Solyc04g049090 TAATTCATA ATCCTGTTAA TTTAATTGAT GGCTAAAGAA CGGTCTATGG 200
SIMLO1_LEAF -----ATGG 4
SIMLO1_ROOT -----ATGG 4
SIMLO1_FLOWER -----ATGG 4

gDNA_Solyc04g049090 AGGCAACCCC TACGTGGGCA ATTGCTGTGG TTTGCTTCAT CTTGCTCGCT 250
cDNA_Solyc04g049090 AGGCAACCCC TACGTGGGCA ATTGCTGTGG TTTGCTTCAT CTTGCTCGCT 250
SIMLO1_LEAF AGGCAACCCC TACGTGGGCA ATTGCTGTGG TTTGCTTCAT CTTGCTCGCT 54
SIMLO1_ROOT AGGCAACCCC TACGTGGGCA ATTGCTGTGG TTTGCTTCAT CTTGCTCGCT 54
SIMLO1_FLOWER AGGCAACCCC TACGTGGGCA ATTGCTGTGG TTTGCTTCAT CTTGCTCGCT 54

gDNA_Solyc04g049090 ATTTCTATTT TTATTGAACA AATTATTCA CACATTGGAG AGGTACCTAC 300
cDNA_Solyc04g049090 ATTTCTATTT TTATTGAACA AATTATTCA CACATTGGAG AG----- 292
SIMLO1_LEAF ATTTCTATTT TTATTGAACA AATTATTCA CACATTGGAG AG----- 96
SIMLO1_ROOT ATTTCTATTT TTATTGAACA AATTATTCA CACATTGGAG AG----- 96
SIMLO1_FLOWER ATTTCTATTT TTATTGAACA AATTATTCA CACATTGGAG AG----- 96

gDNA_Solyc04g049090 TATATAATTT CAAAATCTTT TACTAGATCG ATATGAACAA AATATGCTTA 350
cDNA_Solyc04g049090 -----
SIMLO1_LEAF -----
SIMLO1_ROOT -----
SIMLO1_FLOWER -----

gDNA_Solyc04g049090 TTAATTGTTG GGAAAACCAT TTTCTTTTTT AGTGGTTACT GGAAAAGCGG 400
cDNA_Solyc04g049090 -----
SIMLO1_LEAF -----
SIMLO1_ROOT -----
SIMLO1_FLOWER -----

gDNA_Solyc04g049090 AAAAAGTCTC TATATGAAGC ACTTGAAAAG ATCAAAGCTG GTAAATTCAA 450
cDNA_Solyc04g049090 AAAAAGTCTCTATATGAAGC ACTTGAAAAG ATCAAAGCTG----- 350
SIMLO1_LEAF AAAAAGTCTCTATATGAAGC ACTTGAAAAG ATCAAAGCTG----- 154
SIMLO1_ROOT AAAAAGTCTCTATATGAAGC ACTTGAAAAG ATCAAAGCTG----- 154
SIMLO1_FLOWER AAAAAGTCTCTATATGAAGC ACTTGAAAAG ATCAAAGCTG----- 154

gDNA_Solyc04g049090 AATACAGTCT TGTATTATAA AATAATATAG TTTAAAGATG GATCATACTC 500
cDNA_Solyc04g049090 -----
SIMLO1_LEAF -----
SIMLO1_ROOT -----
SIMLO1_FLOWER -----

gDNA_Solyc04g049090 ATGACATTTT TGGTGTGTGT GTGTGCGACA GAAC TTATGC TGTGGGATT 550
cDNA_Solyc04g049090 -----
SIMLO1_LEAF -----
SIMLO1_ROOT -----
SIMLO1_FLOWER -----

gDNA_Solyc04g049090 CTTATCACTG TTGTTGACAG TGTGCAAGA TCCAGTTTCT AACTTATGTG 600
cDNA_Solyc04g049090 CTTATCACTG TTGTTGACAG TGTGCAAGA TCCAGTTTCT AACTTATGTG 419
SIMLO1_LEAF CTTATCACTG TTGTTGACAG TGTGCAAGA TCCAGTTTCT AACTTATGTG 223
SIMLO1_ROOT CTTATCACTG TTGTTGACAG TGTGCAAGA TCCAGTTTCT AACTTATGTG 223
SIMLO1_FLOWER CTTATCACTG TTGTTGACAG TGTGCAAGA TCCAGTTTCT AACTTATGTG 223

gDNA_Solyc04g049090 TCCCAAGAG TGTGGTTAT TCATGGCATC CTTGTATGGC AAAGGAAGAT 650
cDNA_Solyc04g049090 TCCCAAGAG TGTGGTTAT TCATGGCATC CTTGTATGGC AAAGGAAGAT 469
SIMLO1_LEAF TCCCAAGAG TGTGGTTAT TCATGGCATC CTTGTATGGC AAAGGAAGAT 273
SIMLO1_ROOT TCCCAAGAG TGTGGTTAT TCATGGCATC CTTGTATGGC AAAGGAAGAT 273
SIMLO1_FLOWER TCCCAAGAG TGTGGTTAT TCATGGCATC CTTGTATGGC AAAGGAAGAT 273

gDNA_Solyc04g049090 GCCAAGTCTG AGTATGATGA CCCTTGCTA CCAAAGTAC GCAATATACG 700
cDNA_Solyc04g049090 GCCAAGTCTGAGTATGATGA CCC TTGCTA CCAAAG----- 506
SIMLO1_LEAF GCCAAGTCTGAGTATGATGA CCC TTGCTA CCAAAG----- 310
SIMLO1_ROOT GCCAAGTCTGAGTATGATGA CCC TTGCC TACCAAAG----- 310
SIMLO1_FLOWER GCCAAGTCTGAGTATGATGA CCC TTGCTA CCAAAG----- 310

```

|                     |                    |                    |                     |                   |                     |
|---------------------|--------------------|--------------------|---------------------|-------------------|---------------------|
|                     |                    | 720                |                     | 740               |                     |
| gDNA_Solyc04g049090 | <b>ATAAGTTAAG</b>  | <b>CTCAAGTATC</b>  | <b>ATATTTTTAT</b>   | <b>ATGATATTAG</b> | <b>AGGTCGTAGG</b>   |
| cDNA_Solyc04g049090 | .....              | .....              | .....               | .....             | .....               |
| SIMLO1_LEAF         | .....              | .....              | .....               | .....             | .....               |
| SIMLO1_ROOT         | .....              | .....              | .....               | .....             | .....               |
| SIMLO1_FLOWER       | .....              | .....              | .....               | .....             | .....               |
|                     | 760                |                    | 780                 |                   | 800                 |
| gDNA_Solyc04g049090 | <b>ATTAATTTTC</b>  | <b>ACTACCACCT</b>  | <b>AACTTAAAAA</b>   | <b>GAATTTTTTA</b> | <b>CGTGTTTAAT</b>   |
| cDNA_Solyc04g049090 | .....              | .....              | .....               | .....             | .....               |
| SIMLO1_LEAF         | .....              | .....              | .....               | .....             | .....               |
| SIMLO1_ROOT         | .....              | .....              | .....               | .....             | .....               |
| SIMLO1_FLOWER       | .....              | .....              | .....               | .....             | .....               |
|                     | 820                |                    | 840                 |                   |                     |
| gDNA_Solyc04g049090 | <b>CATCCATAAA</b>  | <b>AAGGAATTAG</b>  | <b>GTCTACATGT</b>   | <b>GAGGGGCATC</b> | <b>ATTGAGAATA</b>   |
| cDNA_Solyc04g049090 | .....              | .....              | .....               | .....             | .....               |
| SIMLO1_LEAF         | .....              | .....              | .....               | .....             | .....               |
| SIMLO1_ROOT         | .....              | .....              | .....               | .....             | .....               |
| SIMLO1_FLOWER       | .....              | .....              | .....               | .....             | .....               |
|                     | 860                |                    | 880                 |                   | 900                 |
| gDNA_Solyc04g049090 | <b>TTATTAACTA</b>  | <b>ATAAAAAGTA</b>  | <b>TGTGATCACA</b>   | <b>TAGGGATGGT</b> | <b>ATTTACATC</b>    |
| cDNA_Solyc04g049090 | .....              | .....              | .....               | .....             | .....               |
| SIMLO1_LEAF         | .....              | .....              | .....               | .....             | .....               |
| SIMLO1_ROOT         | .....              | .....              | .....               | .....             | .....               |
| SIMLO1_FLOWER       | .....              | .....              | .....               | .....             | .....               |
|                     | 920                |                    | 940                 |                   |                     |
| gDNA_Solyc04g049090 | <b>ATTCATTTAG</b>  | <b>GGATGACAAC</b>  | <b>TTTTTATCTG</b>   | <b>AATTAATTTT</b> | <b>TGAGGTAGAA</b>   |
| cDNA_Solyc04g049090 | .....              | .....              | .....               | .....             | .....               |
| SIMLO1_LEAF         | .....              | .....              | .....               | .....             | .....               |
| SIMLO1_ROOT         | .....              | .....              | .....               | .....             | .....               |
| SIMLO1_FLOWER       | .....              | .....              | .....               | .....             | .....               |
|                     | 960                |                    | 980                 |                   | 1,000               |
| gDNA_Solyc04g049090 | <b>TCAAATTTTA</b>  | <b>TTTCTTTGCG</b>  | <b>GTTTCTTATG</b>   | <b>AAATTTAATT</b> | <b>TTAAATATGC</b>   |
| cDNA_Solyc04g049090 | .....              | .....              | .....               | .....             | .....               |
| SIMLO1_LEAF         | .....              | .....              | .....               | .....             | .....               |
| SIMLO1_ROOT         | .....              | .....              | .....               | .....             | .....               |
| SIMLO1_FLOWER       | .....              | .....              | .....               | .....             | .....               |
|                     | 1,020              |                    | 1,040               |                   |                     |
| gDNA_Solyc04g049090 | <b>AGGGAAAAGT</b>  | <b>GCAATTTGCA</b>  | <b>TCTTCATATG</b>   | <b>CAATACACCA</b> | <b>GCTCCATATC</b>   |
| cDNA_Solyc04g049090 | ---                | <b>GAAAAGT</b>     | <b>GCAATTTGCA</b>   | <b>TCTTCATATG</b> | <b>CAATACACCA</b>   |
| SIMLO1_LEAF         | ---                | <b>GAAAAGT</b>     | <b>GCAATTTGCA</b>   | <b>TCTTCATATG</b> | <b>CAATACACCA</b>   |
| SIMLO1_ROOT         | ---                | <b>GAAAAGT</b>     | <b>GCAATTTGCA</b>   | <b>TCTTCATATG</b> | <b>CAATACACCA</b>   |
| SIMLO1_FLOWER       | ---                | <b>GAAAAGT</b>     | <b>GCAATTTGCA</b>   | <b>TCTTCATATG</b> | <b>CAATACACCA</b>   |
|                     | 1,060              |                    | 1,080               |                   | 1,100               |
| gDNA_Solyc04g049090 | <b>TTCATCTTTG</b>  | <b>TATTGGCAGT</b>  | <b>TGCTCATGTA</b>   | <b>TTGTACTGTA</b> | <b>TAGCAACTTT</b>   |
| cDNA_Solyc04g049090 | <b>TTCATCTTTG</b>  | <b>TATTGGCAGT</b>  | <b>TGCTCATGTA</b>   | <b>TTGTACTGTA</b> | <b>TAGCAACTTT</b>   |
| SIMLO1_LEAF         | <b>TTCATCTTTG</b>  | <b>TATTGGCAGT</b>  | <b>TGCTCATGTA</b>   | <b>TTGTACTGTA</b> | <b>TAGCAACTTT</b>   |
| SIMLO1_ROOT         | <b>TTCATCTTTG</b>  | <b>CATTGGCAGT</b>  | <b>TGCTCATGTA</b>   | <b>TTGTACTGTA</b> | <b>TAGCAACTCT</b>   |
| SIMLO1_FLOWER       | <b>TTCATCTTTG</b>  | <b>TATTGGCAGT</b>  | <b>TGCTCATGTA</b>   | <b>TTGTACTGTA</b> | <b>TAGCAACTTT</b>   |
|                     | 1,120              |                    | 1,140               |                   |                     |
| gDNA_Solyc04g049090 | <b>TGCTTTGGGC</b>  | <b>AGGCTAAAGG</b>  | <b>TTTATATATA</b>   | <b>TATATATCTA</b> | <b>TATTCATCTT</b>   |
| cDNA_Solyc04g049090 | <b>TGCTTTGGGC</b>  | <b>AGGCTAAAG -</b> | .....               | .....             | .....               |
| SIMLO1_LEAF         | <b>TGCTTTGGGC</b>  | <b>AGGCTAAAG -</b> | .....               | .....             | .....               |
| SIMLO1_ROOT         | <b>TGCTTTGGGC</b>  | <b>AGGCTAAAG -</b> | .....               | .....             | .....               |
| SIMLO1_FLOWER       | <b>TGCTTTGGGC</b>  | <b>AGGCTAAAG -</b> | .....               | .....             | .....               |
|                     | 1,160              |                    | 1,180               |                   | 1,200               |
| gDNA_Solyc04g049090 | <b>TGGTCATTAA</b>  | <b>TCCATATGAT</b>  | <b>TTTCTTTTTC</b>   | <b>TCTTCTTTGG</b> | <b>TCAATAATTT</b>   |
| cDNA_Solyc04g049090 | .....              | .....              | .....               | .....             | .....               |
| SIMLO1_LEAF         | .....              | .....              | .....               | .....             | .....               |
| SIMLO1_ROOT         | .....              | .....              | .....               | .....             | .....               |
| SIMLO1_FLOWER       | .....              | .....              | .....               | .....             | .....               |
|                     | 1,220              |                    | 1,240               |                   |                     |
| gDNA_Solyc04g049090 | <b>TCTATCTTAA</b>  | <b>TTTGTAGATG</b>  | <b>AGAAAA TGA</b>   | <b>GGGCATGGGA</b> | <b>GGATGAAACA</b>   |
| cDNA_Solyc04g049090 | .....              | .....              | ---                 | <b>ATG</b>        | <b>AGAAAA TGA</b>   |
| SIMLO1_LEAF         | .....              | .....              | ---                 | <b>ATG</b>        | <b>AGAAAA TGA</b>   |
| SIMLO1_ROOT         | .....              | .....              | ---                 | <b>ATG</b>        | <b>AGAAAA TGA</b>   |
| SIMLO1_FLOWER       | .....              | .....              | ---                 | <b>ATG</b>        | <b>AGAAAA TGA</b>   |
|                     | 1,260              |                    | 1,280               |                   | 1,300               |
| gDNA_Solyc04g049090 | <b>AAAACAA TGG</b> | <b>AGTACCAA TT</b> | <b>CTACAACGG T</b>  | <b>TAGTATACAA</b> | <b>GAA TTTGAA T</b> |
| cDNA_Solyc04g049090 | <b>AAAACAA TGG</b> | <b>AGTACCAA TT</b> | <b>CTACAACGG --</b> | .....             | .....               |
| SIMLO1_LEAF         | <b>AAAACAA TGG</b> | <b>AGTACCAA TT</b> | <b>CTACAACGG --</b> | .....             | .....               |
| SIMLO1_ROOT         | <b>AAAACAA TGG</b> | <b>AGTACCAA TT</b> | <b>CTACAACGG --</b> | .....             | .....               |
| SIMLO1_FLOWER       | <b>AAAACAA TGG</b> | <b>AGTACCAA TT</b> | <b>CTACAACGG --</b> | .....             | .....               |
|                     | 1,320              |                    | 1,340               |                   |                     |
| gDNA_Solyc04g049090 | <b>ATTATTTGAA</b>  | <b>TATTTGTCAT</b>  | <b>TTAAATTTAA</b>   | <b>TTAAGAAATT</b> | <b>TTACGTCATT</b>   |
| cDNA_Solyc04g049090 | .....              | .....              | .....               | .....             | .....               |
| SIMLO1_LEAF         | .....              | .....              | .....               | .....             | .....               |
| SIMLO1_ROOT         | .....              | .....              | .....               | .....             | .....               |
| SIMLO1_FLOWER       | .....              | .....              | .....               | .....             | .....               |
|                     | 1,360              |                    | 1,380               |                   | 1,400               |
| gDNA_Solyc04g049090 | <b>AAAGTATAGA</b>  | <b>AGTATACATC</b>  | <b>ATCTCAAGCC</b>   | <b>TTGTAATAAA</b> | <b>TATTCCTTCC</b>   |
| cDNA_Solyc04g049090 | .....              | .....              | .....               | .....             | .....               |
| SIMLO1_LEAF         | .....              | .....              | .....               | .....             | .....               |
| SIMLO1_ROOT         | .....              | .....              | .....               | .....             | .....               |
| SIMLO1_FLOWER       | .....              | .....              | .....               | .....             | .....               |

|                     |                   |                   |                   |                   |                    |
|---------------------|-------------------|-------------------|-------------------|-------------------|--------------------|
|                     |                   | 1,420             |                   | 1,440             |                    |
| gDNA_Solyc04g049090 | <b>CTCCATTTAA</b> | <b>AACTAATAA</b>  | <b>TTTAGTTTGA</b> | <b>GAATTCAAGA</b> | <b>AATAAAAAAG</b>  |
| cDNA_Solyc04g049090 | -----             | -----             | -----             | -----             | -----              |
| SIMLO1_LEAF         | -----             | -----             | -----             | -----             | -----              |
| SIMLO1_ROOT         | -----             | -----             | -----             | -----             | -----              |
| SIMLO1_FLOWER       | -----             | -----             | -----             | -----             | -----              |
|                     | 1,460             |                   | 1,480             |                   | 1,500              |
| gDNA_Solyc04g049090 | <b>GACTTTTGTA</b> | <b>ATTTTATAAT</b> | <b>AAAATTATAT</b> | <b>CACATGTGTT</b> | <b>AAAATATCTT</b>  |
| cDNA_Solyc04g049090 | -----             | -----             | -----             | -----             | -----              |
| SIMLO1_LEAF         | -----             | -----             | -----             | -----             | -----              |
| SIMLO1_ROOT         | -----             | -----             | -----             | -----             | -----              |
| SIMLO1_FLOWER       | -----             | -----             | -----             | -----             | -----              |
|                     |                   | 1,520             |                   | 1,540             |                    |
| gDNA_Solyc04g049090 | <b>TTACTCTTCT</b> | <b>TATTTTAAAT</b> | <b>ATATTATGTA</b> | <b>AAAAATTTAA</b> | <b>ATTAAAAATAT</b> |
| cDNA_Solyc04g049090 | -----             | -----             | -----             | -----             | -----              |
| SIMLO1_LEAF         | -----             | -----             | -----             | -----             | -----              |
| SIMLO1_ROOT         | -----             | -----             | -----             | -----             | -----              |
| SIMLO1_FLOWER       | -----             | -----             | -----             | -----             | -----              |
|                     | 1,560             |                   | 1,580             |                   | 1,600              |
| gDNA_Solyc04g049090 | <b>CATCAAAAAT</b> | <b>GATAAAAAAT</b> | <b>TATTTTATCG</b> | <b>TATAAAGACA</b> | <b>CTCAAAAGAA</b>  |
| cDNA_Solyc04g049090 | -----             | -----             | -----             | -----             | -----              |
| SIMLO1_LEAF         | -----             | -----             | -----             | -----             | -----              |
| SIMLO1_ROOT         | -----             | -----             | -----             | -----             | -----              |
| SIMLO1_FLOWER       | -----             | -----             | -----             | -----             | -----              |
|                     |                   | 1,620             |                   | 1,640             |                    |
| gDNA_Solyc04g049090 | <b>AATCTGTCAT</b> | <b>TATTTTGGAA</b> | <b>ACTATAAAAG</b> | <b>TATGAAAAGA</b> | <b>CAACTCTGCC</b>  |
| cDNA_Solyc04g049090 | -----             | -----             | -----             | -----             | -----              |
| SIMLO1_LEAF         | -----             | -----             | -----             | -----             | -----              |
| SIMLO1_ROOT         | -----             | -----             | -----             | -----             | -----              |
| SIMLO1_FLOWER       | -----             | -----             | -----             | -----             | -----              |
|                     | 1,660             |                   | 1,680             |                   | 1,700              |
| gDNA_Solyc04g049090 | <b>CCTTAATCAT</b> | <b>TAGATATTTA</b> | <b>GAACCTTAGA</b> | <b>CCTAAGGTGG</b> | <b>AGTTGATTCA</b>  |
| cDNA_Solyc04g049090 | -----             | -----             | -----             | -----             | -----              |
| SIMLO1_LEAF         | -----             | -----             | -----             | -----             | -----              |
| SIMLO1_ROOT         | -----             | -----             | -----             | -----             | -----              |
| SIMLO1_FLOWER       | -----             | -----             | -----             | -----             | -----              |
|                     |                   | 1,720             |                   | 1,740             |                    |
| gDNA_Solyc04g049090 | <b>AAAATAGAAA</b> | <b>TATATTAAT</b>  | <b>GCTATTAAAA</b> | <b>AATAAGCCCA</b> | <b>CAAACATTTT</b>  |
| cDNA_Solyc04g049090 | -----             | -----             | -----             | -----             | -----              |
| SIMLO1_LEAF         | -----             | -----             | -----             | -----             | -----              |
| SIMLO1_ROOT         | -----             | -----             | -----             | -----             | -----              |
| SIMLO1_FLOWER       | -----             | -----             | -----             | -----             | -----              |
|                     | 1,760             |                   | 1,780             |                   | 1,800              |
| gDNA_Solyc04g049090 | <b>AATTTAGCTA</b> | <b>CAAATTGATG</b> | <b>TGACATATAT</b> | <b>CTAAAAAGTT</b> | <b>TGGACACGTC</b>  |
| cDNA_Solyc04g049090 | -----             | -----             | -----             | -----             | -----              |
| SIMLO1_LEAF         | -----             | -----             | -----             | -----             | -----              |
| SIMLO1_ROOT         | -----             | -----             | -----             | -----             | -----              |
| SIMLO1_FLOWER       | -----             | -----             | -----             | -----             | -----              |
|                     |                   | 1,820             |                   | 1,840             |                    |
| gDNA_Solyc04g049090 | <b>TATTGTTATT</b> | <b>TATTTTTTAA</b> | <b>ATATTCTTGG</b> | <b>ACCCCAAGTG</b> | <b>GTAGCTATTG</b>  |
| cDNA_Solyc04g049090 | -----             | -----             | -----             | -----             | -----              |
| SIMLO1_LEAF         | -----             | -----             | -----             | -----             | -----              |
| SIMLO1_ROOT         | -----             | -----             | -----             | -----             | -----              |
| SIMLO1_FLOWER       | -----             | -----             | -----             | -----             | -----              |
|                     | 1,860             |                   | 1,880             |                   | 1,900              |
| gDNA_Solyc04g049090 | <b>CCTATTGGAT</b> | <b>AAGTAATGTG</b> | <b>AATAAAGGGA</b> | <b>ATCATTGCA</b>  | <b>AGTTGCACCT</b>  |
| cDNA_Solyc04g049090 | -----             | -----             | -----             | -----             | -----              |
| SIMLO1_LEAF         | -----             | -----             | -----             | -----             | -----              |
| SIMLO1_ROOT         | -----             | -----             | -----             | -----             | -----              |
| SIMLO1_FLOWER       | -----             | -----             | -----             | -----             | -----              |
|                     |                   | 1,920             |                   | 1,940             |                    |
| gDNA_Solyc04g049090 | <b>TTTAATACCA</b> | <b>AATTAATTGA</b> | <b>CCGACACTTC</b> | <b>ATTCGTACAT</b> | <b>TCTTAGTTTA</b>  |
| cDNA_Solyc04g049090 | -----             | -----             | -----             | -----             | -----              |
| SIMLO1_LEAF         | -----             | -----             | -----             | -----             | -----              |
| SIMLO1_ROOT         | -----             | -----             | -----             | -----             | -----              |
| SIMLO1_FLOWER       | -----             | -----             | -----             | -----             | -----              |
|                     | 1,960             |                   | 1,980             |                   | 2,000              |
| gDNA_Solyc04g049090 | <b>TTTCGATTAG</b> | <b>TATATCACTA</b> | <b>TTTTTATGAT</b> | <b>GTAATATAA</b>  | <b>AAGAATTTTA</b>  |
| cDNA_Solyc04g049090 | -----             | -----             | -----             | -----             | -----              |
| SIMLO1_LEAF         | -----             | -----             | -----             | -----             | -----              |
| SIMLO1_ROOT         | -----             | -----             | -----             | -----             | -----              |
| SIMLO1_FLOWER       | -----             | -----             | -----             | -----             | -----              |
|                     |                   | 2,020             |                   | 2,040             |                    |
| gDNA_Solyc04g049090 | <b>TAATTTATAC</b> | <b>TACTATTAAT</b> | <b>ATAATATGTA</b> | <b>ATTAATATAA</b> | <b>TTTTAAGAAA</b>  |
| cDNA_Solyc04g049090 | -----             | -----             | -----             | -----             | -----              |
| SIMLO1_LEAF         | -----             | -----             | -----             | -----             | -----              |
| SIMLO1_ROOT         | -----             | -----             | -----             | -----             | -----              |
| SIMLO1_FLOWER       | -----             | -----             | -----             | -----             | -----              |
|                     | 2,060             |                   | 2,080             |                   | 2,100              |
| gDNA_Solyc04g049090 | <b>TTAATTAAT</b>  | <b>TGACTTTTTA</b> | <b>TTTTTTTTAA</b> | <b>AAAAACATGG</b> | <b>CAATTACAAA</b>  |
| cDNA_Solyc04g049090 | -----             | -----             | -----             | -----             | -----              |
| SIMLO1_LEAF         | -----             | -----             | -----             | -----             | -----              |
| SIMLO1_ROOT         | -----             | -----             | -----             | -----             | -----              |
| SIMLO1_FLOWER       | -----             | -----             | -----             | -----             | -----              |

|                     |                    |                    |                   |                   |                    |
|---------------------|--------------------|--------------------|-------------------|-------------------|--------------------|
|                     |                    | 2,120              |                   | 2,140             |                    |
| gDNA_Solyc04g049090 | <b>TAAACTGAGG</b>  | <b>GAGTACTTAT</b>  | <b>TATTGCTAGC</b> | <b>TCTCTTTCTA</b> | <b>GTTTGGTCCC</b>  |
| cDNA_Solyc04g049090 | -----              | -----              | -----             | -----             | -----              |
| SIMLO1_LEAF         | -----              | -----              | -----             | -----             | -----              |
| SIMLO1_ROOT         | -----              | -----              | -----             | -----             | -----              |
| SIMLO1_FLOWER       | -----              | -----              | -----             | -----             | -----              |
|                     | 2,160              |                    | 2,180             |                   | 2,200              |
| gDNA_Solyc04g049090 | <b>CTTTGAGGTT</b>  | <b>TGACTTACTT</b>  | <b>ATTTTTCCAT</b> | <b>TACTTGTTTG</b> | <b>GTTTTCTTTG</b>  |
| cDNA_Solyc04g049090 | -----              | -----              | -----             | -----             | -----              |
| SIMLO1_LEAF         | -----              | -----              | -----             | -----             | -----              |
| SIMLO1_ROOT         | -----              | -----              | -----             | -----             | -----              |
| SIMLO1_FLOWER       | -----              | -----              | -----             | -----             | -----              |
|                     | 2,220              |                    | 2,240             |                   |                    |
| gDNA_Solyc04g049090 | <b>GACAATTTTA</b>  | <b>TATTCTAACT</b>  | <b>TGGCAGTTTA</b> | <b>CACGTTAAGA</b> | <b>TTATAAATAA</b>  |
| cDNA_Solyc04g049090 | -----              | -----              | -----             | -----             | -----              |
| SIMLO1_LEAF         | -----              | -----              | -----             | -----             | -----              |
| SIMLO1_ROOT         | -----              | -----              | -----             | -----             | -----              |
| SIMLO1_FLOWER       | -----              | -----              | -----             | -----             | -----              |
|                     | 2,260              |                    | 2,280             |                   | 2,300              |
| gDNA_Solyc04g049090 | <b>AATATATTTT</b>  | <b>GAAATTTAAA</b>  | <b>ATTATACGAA</b> | <b>GAAAATTAAT</b> | <b>CATGAGAAGT</b>  |
| cDNA_Solyc04g049090 | -----              | -----              | -----             | -----             | -----              |
| SIMLO1_LEAF         | -----              | -----              | -----             | -----             | -----              |
| SIMLO1_ROOT         | -----              | -----              | -----             | -----             | -----              |
| SIMLO1_FLOWER       | -----              | -----              | -----             | -----             | -----              |
|                     | 2,320              |                    | 2,340             |                   |                    |
| gDNA_Solyc04g049090 | <b>CAAAATGAAA</b>  | <b>GAAATTTAAA</b>  | <b>ATTATTATTG</b> | <b>TTGACTTTAT</b> | <b>TTATTGGTAT</b>  |
| cDNA_Solyc04g049090 | -----              | -----              | -----             | -----             | -----              |
| SIMLO1_LEAF         | -----              | -----              | -----             | -----             | -----              |
| SIMLO1_ROOT         | -----              | -----              | -----             | -----             | -----              |
| SIMLO1_FLOWER       | -----              | -----              | -----             | -----             | -----              |
|                     | 2,360              |                    | 2,380             |                   | 2,400              |
| gDNA_Solyc04g049090 | <b>TTGATGGTTG</b>  | <b>CAGACCCTGA</b>  | <b>GAGATTCAGA</b> | <b>TTTGCAAGGG</b> | <b>AGACCTCGTT</b>  |
| cDNA_Solyc04g049090 | -----              | ---                | ---               | ---               | ---                |
| SIMLO1_LEAF         | -----              | ---                | ---               | ---               | ---                |
| SIMLO1_ROOT         | -----              | ---                | ---               | ---               | ---                |
| SIMLO1_FLOWER       | -----              | ---                | ---               | ---               | ---                |
|                     | 2,420              |                    | 2,440             |                   |                    |
| gDNA_Solyc04g049090 | <b>TGGACGTAGG</b>  | <b>CATTTGCATT</b>  | <b>TCTGGAGCAA</b> | <b>GTCCCCCGTG</b> | <b>TTGCTCTCGA</b>  |
| cDNA_Solyc04g049090 | <b>TGGACGTAGG</b>  | <b>CATTTGCATT</b>  | <b>TCTGGAGCAA</b> | <b>GTCCCCCGTG</b> | <b>TTGCTCTCGA</b>  |
| SIMLO1_LEAF         | <b>TGGACGTAGG</b>  | <b>CATTTGCATT</b>  | <b>TCTGGAGCAA</b> | <b>GTCCCCCGTG</b> | <b>TTGCTCTCGA</b>  |
| SIMLO1_ROOT         | <b>TGGACGTAGG</b>  | <b>CATTTGCATT</b>  | <b>TCTGGAGCAA</b> | <b>GTCCCCCGTG</b> | <b>TTGCTCTCGA</b>  |
| SIMLO1_FLOWER       | <b>TGGACGTAGG</b>  | <b>CATTTGCATT</b>  | <b>TCTGGAGCAA</b> | <b>GTCCCCCGTG</b> | <b>TTGCTCTCGA</b>  |
|                     | 2,460              |                    | 2,480             |                   | 2,500              |
| gDNA_Solyc04g049090 | <b>TAGTGAGTCC</b>  | <b>ATCCATTATA</b>  | <b>TATAATATAA</b> | <b>TATTATTTTT</b> | <b>ATTACGTTAT</b>  |
| cDNA_Solyc04g049090 | <b>TA</b> -----    | -----              | -----             | -----             | -----              |
| SIMLO1_LEAF         | <b>TA</b> -----    | -----              | -----             | -----             | -----              |
| SIMLO1_ROOT         | <b>TA</b> -----    | -----              | -----             | -----             | -----              |
| SIMLO1_FLOWER       | <b>TA</b> -----    | -----              | -----             | -----             | -----              |
|                     | 2,520              |                    | 2,540             |                   |                    |
| gDNA_Solyc04g049090 | <b>AATTGTTATG</b>  | <b>ATTGAAATAA</b>  | <b>TTAGATTGAA</b> | <b>TGAGTAAATA</b> | <b>AGTCTCTAAA</b>  |
| cDNA_Solyc04g049090 | -----              | -----              | -----             | -----             | -----              |
| SIMLO1_LEAF         | -----              | -----              | -----             | -----             | -----              |
| SIMLO1_ROOT         | -----              | -----              | -----             | -----             | -----              |
| SIMLO1_FLOWER       | -----              | -----              | -----             | -----             | -----              |
|                     | 2,560              |                    | 2,580             |                   | 2,600              |
| gDNA_Solyc04g049090 | <b>AAATTATGAA</b>  | <b>TAAAAAGATA</b>  | <b>AACGAGAAAC</b> | <b>ATATTGAAAG</b> | <b>ATACAAATTA</b>  |
| cDNA_Solyc04g049090 | -----              | -----              | -----             | -----             | -----              |
| SIMLO1_LEAF         | -----              | -----              | -----             | -----             | -----              |
| SIMLO1_ROOT         | -----              | -----              | -----             | -----             | -----              |
| SIMLO1_FLOWER       | -----              | -----              | -----             | -----             | -----              |
|                     | 2,620              |                    | 2,640             |                   |                    |
| gDNA_Solyc04g049090 | <b>ACGTGATTCA</b>  | <b>GTCAATCGAT</b>  | <b>TTATATCCAT</b> | <b>AAGAGAAATG</b> | <b>AGCAATCTAC</b>  |
| cDNA_Solyc04g049090 | -----              | -----              | -----             | -----             | -----              |
| SIMLO1_LEAF         | -----              | -----              | -----             | -----             | -----              |
| SIMLO1_ROOT         | -----              | -----              | -----             | -----             | -----              |
| SIMLO1_FLOWER       | -----              | -----              | -----             | -----             | -----              |
|                     | 2,660              |                    | 2,680             |                   | 2,700              |
| gDNA_Solyc04g049090 | <b>TGTATAAATA</b>  | <b>TATATAAAAA</b>  | <b>AATATTAAGA</b> | <b>AAAAATACGG</b> | <b>TACAAATTTAC</b> |
| cDNA_Solyc04g049090 | -----              | -----              | -----             | -----             | -----              |
| SIMLO1_LEAF         | -----              | -----              | -----             | -----             | -----              |
| SIMLO1_ROOT         | -----              | -----              | -----             | -----             | -----              |
| SIMLO1_FLOWER       | -----              | -----              | -----             | -----             | -----              |
|                     | 2,720              |                    | 2,740             |                   |                    |
| gDNA_Solyc04g049090 | <b>TCAAAA TAAT</b> | <b>AAGAAGTTAA</b>  | <b>TACTTGTGTC</b> | <b>TAATCGTTTC</b> | <b>TCCCCCGTAC</b>  |
| cDNA_Solyc04g049090 | -----              | -----              | -----             | -----             | -----              |
| SIMLO1_LEAF         | -----              | -----              | -----             | -----             | -----              |
| SIMLO1_ROOT         | -----              | -----              | -----             | -----             | -----              |
| SIMLO1_FLOWER       | -----              | -----              | -----             | -----             | -----              |
|                     | 2,760              |                    | 2,780             |                   | 2,800              |
| gDNA_Solyc04g049090 | <b>AAAAC TCAA</b>  | <b>GAATGAAC TT</b> | <b>CTATATATTT</b> | <b>CTGTTTATAG</b> | <b>AGTTAAAAAA</b>  |
| cDNA_Solyc04g049090 | -----              | -----              | -----             | -----             | -----              |
| SIMLO1_LEAF         | -----              | -----              | -----             | -----             | -----              |
| SIMLO1_ROOT         | -----              | -----              | -----             | -----             | -----              |
| SIMLO1_FLOWER       | -----              | -----              | -----             | -----             | -----              |

|                     |                   |                   |                   |                   |                    |      |
|---------------------|-------------------|-------------------|-------------------|-------------------|--------------------|------|
|                     |                   |                   | 2,820             |                   | 2,840              |      |
| gDNA_Solyc04g049090 | <b>AAATAACTA</b>  | <b>TCCAATATG</b>  | <b>AAACATTAT</b>  | <b>TATTTTCCTT</b> | <b>TAAAGAAACA</b>  | 2850 |
| cDNA_Solyc04g049090 | -----             | -----             | -----             | -----             | -----              | 772  |
| SIMLO1_LEAF         | -----             | -----             | -----             | -----             | -----              | 576  |
| SIMLO1_ROOT         | -----             | -----             | -----             | -----             | -----              | 576  |
| SIMLO1_FLOWER       | -----             | -----             | -----             | -----             | -----              | 576  |
|                     | 2,860             |                   | 2,880             |                   | 2,900              |      |
| gDNA_Solyc04g049090 | <b>AAAAGGAAA</b>  | <b>CCCTTAAGAA</b> | <b>ACTAGGGCAA</b> | <b>ACAATATCCC</b> | <b>ATATTTATCA</b>  | 2900 |
| cDNA_Solyc04g049090 | -----             | -----             | -----             | -----             | -----              | 772  |
| SIMLO1_LEAF         | -----             | -----             | -----             | -----             | -----              | 576  |
| SIMLO1_ROOT         | -----             | -----             | -----             | -----             | -----              | 576  |
| SIMLO1_FLOWER       | -----             | -----             | -----             | -----             | -----              | 576  |
|                     |                   | 2,920             |                   | 2,940             |                    |      |
| gDNA_Solyc04g049090 | <b>TAAAATTTAT</b> | <b>TACTAGTAGC</b> | <b>ATAAATAATT</b> | <b>ATTGTGTAAG</b> | <b>GATTCATTAA</b>  | 2950 |
| cDNA_Solyc04g049090 | -----             | -----             | -----             | -----             | -----              | 772  |
| SIMLO1_LEAF         | -----             | -----             | -----             | -----             | -----              | 576  |
| SIMLO1_ROOT         | -----             | -----             | -----             | -----             | -----              | 576  |
| SIMLO1_FLOWER       | -----             | -----             | -----             | -----             | -----              | 576  |
|                     | 2,960             |                   | 2,980             |                   | 3,000              |      |
| gDNA_Solyc04g049090 | <b>ACTGATATT</b>  | <b>TTGTGATTCT</b> | <b>ATTTACAGG</b>  | <b>TTGTTTCTTT</b> | <b>CGGCAATTCT</b>  | 3000 |
| cDNA_Solyc04g049090 | -----             | -----             | -----             | <b>-GT</b>        | <b>TTGTTTCTTT</b>  | 794  |
| SIMLO1_LEAF         | -----             | -----             | -----             | <b>-GT</b>        | <b>TTGTTTCTTT</b>  | 598  |
| SIMLO1_ROOT         | -----             | -----             | -----             | <b>-GT</b>        | <b>TTGTTTCTTT</b>  | 598  |
| SIMLO1_FLOWER       | -----             | -----             | -----             | <b>-GT</b>        | <b>TTGTTTCTTT</b>  | 598  |
|                     |                   | 3,020             |                   | 3,040             |                    |      |
| gDNA_Solyc04g049090 | <b>TCTCATCAGT</b> | <b>TGCAAAAGTT</b> | <b>GACTATTTAA</b> | <b>CCCTTAGACA</b> | <b>TGGGTTTCATG</b> | 3050 |
| cDNA_Solyc04g049090 | <b>TCTCATCAGT</b> | <b>TGCAAAAGTT</b> | <b>GACTATTTAA</b> | <b>CCCTTAGACA</b> | <b>TGGGTTTCATG</b> | 844  |
| SIMLO1_LEAF         | <b>TCTCATCAGT</b> | <b>TGCAAAAGTT</b> | <b>GACTATTTAA</b> | <b>CCCTTAGACA</b> | <b>TGGGTTTCATG</b> | 648  |
| SIMLO1_ROOT         | <b>TCTCATCAGT</b> | <b>TGCAAAAGTT</b> | <b>GACTATTTAA</b> | <b>CCCTTAGACA</b> | <b>TGGGTTTCATG</b> | 648  |
| SIMLO1_FLOWER       | <b>TCTCATCAGT</b> | <b>TGCAAAAGTT</b> | <b>GACTATTTAA</b> | <b>CCCTTAGACA</b> | <b>TGGGTTTCATG</b> | 648  |
|                     | 3,060             |                   | 3,080             |                   | 3,100              |      |
| gDNA_Solyc04g049090 | <b>ATGGTAAGTC</b> | <b>AATCTAGCAC</b> | <b>CAATATAACG</b> | <b>TGAAATTATA</b> | <b>CGATATCCAA</b>  | 3100 |
| cDNA_Solyc04g049090 | <b>ATGG</b>       | -----             | -----             | -----             | -----              | 848  |
| SIMLO1_LEAF         | <b>ATGG</b>       | -----             | -----             | -----             | -----              | 652  |
| SIMLO1_ROOT         | <b>ATGG</b>       | -----             | -----             | -----             | -----              | 652  |
| SIMLO1_FLOWER       | <b>ATGG</b>       | -----             | -----             | -----             | -----              | 652  |
|                     |                   | 3,120             |                   | 3,140             |                    |      |
| gDNA_Solyc04g049090 | <b>GATACTATTG</b> | <b>AAAAATAATT</b> | <b>ATTTTTTTTG</b> | <b>GATCCATGTA</b> | <b>ATTAAGTCA</b>   | 3150 |
| cDNA_Solyc04g049090 | -----             | -----             | -----             | -----             | -----              | 848  |
| SIMLO1_LEAF         | -----             | -----             | -----             | -----             | -----              | 652  |
| SIMLO1_ROOT         | -----             | -----             | -----             | -----             | -----              | 652  |
| SIMLO1_FLOWER       | -----             | -----             | -----             | -----             | -----              | 652  |
|                     | 3,160             |                   | 3,180             |                   | 3,200              |      |
| gDNA_Solyc04g049090 | <b>GGCACATTTA</b> | <b>ACTCCACAAA</b> | <b>ATCAAAATAA</b> | <b>TTTTGATTTT</b> | <b>CAATTATACA</b>  | 3200 |
| cDNA_Solyc04g049090 | <b>--CACATTTA</b> | <b>ACTCCACAAA</b> | <b>ATCAAAATAA</b> | <b>TTTTGATTTT</b> | <b>CAATTATACA</b>  | 896  |
| SIMLO1_LEAF         | <b>--CACATTTA</b> | <b>ACTCCACAAA</b> | <b>ATCAAAATAA</b> | <b>TTTTGATTTT</b> | <b>CAATTATACA</b>  | 700  |
| SIMLO1_ROOT         | <b>--CACATTTA</b> | <b>ACTCCACAAA</b> | <b>ATCAAAATAA</b> | <b>TTTTGATTTT</b> | <b>CAATTATACA</b>  | 700  |
| SIMLO1_FLOWER       | <b>--CACATTTA</b> | <b>ACTCCACAAA</b> | <b>ATCAAAATAA</b> | <b>TTTTGATTTT</b> | <b>CAATTATACA</b>  | 700  |
|                     |                   | 3,220             |                   | 3,240             |                    |      |
| gDNA_Solyc04g049090 | <b>TTAACAGAGC</b> | <b>AGTTGACAAA</b> | <b>GACTTCAAAG</b> | <b>TTGTTGTTGG</b> | <b>AATAAGGTTT</b>  | 3250 |
| cDNA_Solyc04g049090 | <b>TTAACAGAGC</b> | <b>AGTTGACAAA</b> | <b>GACTTCAAAG</b> | <b>TTGTTGTTGG</b> | <b>AATAAG----</b>  | 942  |
| SIMLO1_LEAF         | <b>TTAACAGAGC</b> | <b>AGTTGACAAA</b> | <b>GACTTCAAAG</b> | <b>TTGTTGTTGG</b> | <b>AATAAG----</b>  | 746  |
| SIMLO1_ROOT         | <b>TTAACAGAGC</b> | <b>AGTTGACAGA</b> | <b>GACTTCAAAG</b> | <b>TTGTTGTTGG</b> | <b>AATAAG----</b>  | 746  |
| SIMLO1_FLOWER       | <b>TTAACAGAGC</b> | <b>AGTTGACAAA</b> | <b>GACTTCAAAG</b> | <b>TTGTTGTTGG</b> | <b>AATAAG----</b>  | 746  |
|                     | 3,260             |                   | 3,280             |                   | 3,300              |      |
| gDNA_Solyc04g049090 | <b>ACATCTTTCT</b> | <b>TCATTGGCAT</b> | <b>AATACCTAAT</b> | <b>TTGACTTTAA</b> | <b>ATTTTTACTT</b>  | 3300 |
| cDNA_Solyc04g049090 | -----             | -----             | -----             | -----             | -----              | 942  |
| SIMLO1_LEAF         | -----             | -----             | -----             | -----             | -----              | 746  |
| SIMLO1_ROOT         | -----             | -----             | -----             | -----             | -----              | 746  |
| SIMLO1_FLOWER       | -----             | -----             | -----             | -----             | -----              | 746  |
|                     |                   | 3,320             |                   | 3,340             |                    |      |
| gDNA_Solyc04g049090 | <b>GACCTTCAAT</b> | <b>TTTTATAATG</b> | <b>CACAAACATA</b> | <b>CACTTTACTT</b> | <b>ATCAAACTTT</b>  | 3350 |
| cDNA_Solyc04g049090 | -----             | -----             | -----             | -----             | -----              | 942  |
| SIMLO1_LEAF         | -----             | -----             | -----             | -----             | -----              | 746  |
| SIMLO1_ROOT         | -----             | -----             | -----             | -----             | -----              | 746  |
| SIMLO1_FLOWER       | -----             | -----             | -----             | -----             | -----              | 746  |
|                     | 3,360             |                   | 3,380             |                   | 3,400              |      |
| gDNA_Solyc04g049090 | <b>TAAATAAATA</b> | <b>AACACATGAA</b> | <b>TCATACATGA</b> | <b>CACAATACAC</b> | <b>GTAAGATACC</b>  | 3400 |
| cDNA_Solyc04g049090 | -----             | -----             | -----             | -----             | -----              | 942  |
| SIMLO1_LEAF         | -----             | -----             | -----             | -----             | -----              | 746  |
| SIMLO1_ROOT         | -----             | -----             | -----             | -----             | -----              | 746  |
| SIMLO1_FLOWER       | -----             | -----             | -----             | -----             | -----              | 746  |
|                     |                   | 3,420             |                   | 3,440             |                    |      |
| gDNA_Solyc04g049090 | <b>ACGTAGGATA</b> | <b>AAAAATGACA</b> | <b>CATAGAACAT</b> | <b>GTGTGCCTAT</b> | <b>TTGTTGACT</b>   | 3450 |
| cDNA_Solyc04g049090 | -----             | -----             | -----             | -----             | -----              | 942  |
| SIMLO1_LEAF         | -----             | -----             | -----             | -----             | -----              | 746  |
| SIMLO1_ROOT         | -----             | -----             | -----             | -----             | -----              | 746  |
| SIMLO1_FLOWER       | -----             | -----             | -----             | -----             | -----              | 746  |
|                     | 3,460             |                   | 3,480             |                   | 3,500              |      |
| gDNA_Solyc04g049090 | <b>TTGTACAATT</b> | <b>TTAAGTATCT</b> | <b>ACTTGTGCAT</b> | <b>ATCCAAAATT</b> | <b>AAAAGACATA</b>  | 3500 |
| cDNA_Solyc04g049090 | -----             | -----             | -----             | -----             | -----              | 942  |
| SIMLO1_LEAF         | -----             | -----             | -----             | -----             | -----              | 746  |
| SIMLO1_ROOT         | -----             | -----             | -----             | -----             | -----              | 746  |
| SIMLO1_FLOWER       | -----             | -----             | -----             | -----             | -----              | 746  |

|                     |                    |                    |                    |                   |                    |
|---------------------|--------------------|--------------------|--------------------|-------------------|--------------------|
|                     |                    | 3,520              |                    | 3,540             |                    |
| gDNA_Solyc04g049090 | <b>AATATAATTT</b>  | <b>AAAGCCAAAT</b>  | <b>TAAAGGATAT</b>  | <b>ATTTATGTAT</b> | <b>TATGCCTTCT</b>  |
| cDNA_Solyc04g049090 | .....              | .....              | .....              | .....             | .....              |
| SIMLO1_LEAF         | .....              | .....              | .....              | .....             | .....              |
| SIMLO1_ROOT         | .....              | .....              | .....              | .....             | .....              |
| SIMLO1_FLOWER       | .....              | .....              | .....              | .....             | .....              |
|                     |                    | 3,560              |                    | 3,580             |                    |
| gDNA_Solyc04g049090 | <b>TTATTTCCCTC</b> | <b>AAGCAATTCT</b>  | <b>TCTTTTACTA</b>  | <b>TTAAAGCTAT</b> | <b>ACCATGATAA</b>  |
| cDNA_Solyc04g049090 | .....              | .....              | .....              | .....             | .....              |
| SIMLO1_LEAF         | .....              | .....              | .....              | .....             | .....              |
| SIMLO1_ROOT         | .....              | .....              | .....              | .....             | .....              |
| SIMLO1_FLOWER       | .....              | .....              | .....              | .....             | .....              |
|                     |                    | 3,620              |                    | 3,640             |                    |
| gDNA_Solyc04g049090 | <b>TTATAATAAC</b>  | <b>ACTATTTATG</b>  | <b>TTGCAGTCCT</b>  | <b>GCATTATGGC</b> | <b>TCTTCACGGT</b>  |
| cDNA_Solyc04g049090 | .....              | .....              | .....TCCT          | <b>GCATTATGGC</b> | <b>TCTTCACGGT</b>  |
| SIMLO1_LEAF         | .....              | .....              | .....TCCT          | <b>GCATTATGGC</b> | <b>TCTTCACGGT</b>  |
| SIMLO1_ROOT         | .....              | .....              | .....TCCT          | <b>GCATTATGGC</b> | <b>TCTTCACGGT</b>  |
| SIMLO1_FLOWER       | .....              | .....              | .....TCCT          | <b>GCATTATGGC</b> | <b>TCTTCACGGT</b>  |
|                     |                    | 3,660              |                    | 3,680             |                    |
| gDNA_Solyc04g049090 | <b>GCATATTTTT</b>  | <b>CTGACTACTA</b>  | <b>CCGATCGTAC</b>  | <b>GTATTAATTT</b> | <b>GGCCTTATTT</b>  |
| cDNA_Solyc04g049090 | <b>GCATATTTTT</b>  | <b>CTGACTACTA</b>  | <b>CCGATCGC</b>    | .....             | .....              |
| SIMLO1_LEAF         | <b>GCATATTTTT</b>  | <b>CTGACTACTA</b>  | <b>CCGATCGC</b>    | .....             | .....              |
| SIMLO1_ROOT         | <b>GCATATTTTT</b>  | <b>CTGACTACTA</b>  | <b>CCGATCGC</b>    | .....             | .....              |
| SIMLO1_FLOWER       | <b>GCATATTTTT</b>  | <b>CTGACTACTA</b>  | <b>CCGATCGC</b>    | .....             | .....              |
|                     |                    | 3,720              |                    | 3,740             |                    |
| gDNA_Solyc04g049090 | <b>CACATTTATA</b>  | <b>TATTCTAATT</b>  | <b>TTGAGTGTAA</b>  | <b>ATAAGTAGAT</b> | <b>ATATAGTTCT</b>  |
| cDNA_Solyc04g049090 | .....              | .....              | .....              | .....             | .....              |
| SIMLO1_LEAF         | .....              | .....              | .....              | .....             | .....              |
| SIMLO1_ROOT         | .....              | .....              | .....              | .....             | .....              |
| SIMLO1_FLOWER       | .....              | .....              | .....              | .....             | .....              |
|                     |                    | 3,760              |                    | 3,780             |                    |
| gDNA_Solyc04g049090 | <b>GCGTGTCTATA</b> | <b>ATACATGTAT</b>  | <b>GAAGCAAATT</b>  | <b>ATCACGTATG</b> | <b>ACATGTATGT</b>  |
| cDNA_Solyc04g049090 | .....              | .....              | .....              | .....             | .....              |
| SIMLO1_LEAF         | .....              | .....              | .....              | .....             | .....              |
| SIMLO1_ROOT         | .....              | .....              | .....              | .....             | .....              |
| SIMLO1_FLOWER       | .....              | .....              | .....              | .....             | .....              |
|                     |                    | 3,820              |                    | 3,840             |                    |
| gDNA_Solyc04g049090 | <b>TTATTTATTT</b>  | <b>TTACAAATTT</b>  | <b>GAATATCTAC</b>  | <b>TTATTTGCAC</b> | <b>TCAAAATTGG</b>  |
| cDNA_Solyc04g049090 | .....              | .....              | .....              | .....             | .....              |
| SIMLO1_LEAF         | .....              | .....              | .....              | .....             | .....              |
| SIMLO1_ROOT         | .....              | .....              | .....              | .....             | .....              |
| SIMLO1_FLOWER       | .....              | .....              | .....              | .....             | .....              |
|                     |                    | 3,860              |                    | 3,880             |                    |
| gDNA_Solyc04g049090 | <b>AGGATATAAA</b>  | <b>TGTGAATCGG</b>  | <b>GACCACACAT</b>  | <b>ATTTATGTGT</b> | <b>TATGGCATTG</b>  |
| cDNA_Solyc04g049090 | .....              | .....              | .....              | .....             | .....              |
| SIMLO1_LEAF         | .....              | .....              | .....              | .....             | .....              |
| SIMLO1_ROOT         | .....              | .....              | .....              | .....             | .....              |
| SIMLO1_FLOWER       | .....              | .....              | .....              | .....             | .....              |
|                     |                    | 3,920              |                    | 3,940             |                    |
| gDNA_Solyc04g049090 | <b>AAAGGATTAT</b>  | <b>TAATTAGTTG</b>  | <b>AATAAAGCAT</b>  | <b>ATGTAATTGA</b> | <b>AAGTTGTTAC</b>  |
| cDNA_Solyc04g049090 | .....              | .....              | .....              | .....             | .....              |
| SIMLO1_LEAF         | .....              | .....              | .....              | .....             | .....              |
| SIMLO1_ROOT         | .....              | .....              | .....              | .....             | .....              |
| SIMLO1_FLOWER       | .....              | .....              | .....              | .....             | .....              |
|                     |                    | 3,960              |                    | 3,980             |                    |
| gDNA_Solyc04g049090 | <b>TTTTAATATT</b>  | <b>GGACAGGATT</b>  | <b>GTACTCGTAT</b>  | <b>CTTTGGGTGC</b> | <b>CATTTATCCC</b>  |
| cDNA_Solyc04g049090 | .....              | .....ATT           | <b>GTACTCGTAT</b>  | <b>CTTTGGGTGC</b> | <b>CATTTATCCC</b>  |
| SIMLO1_LEAF         | .....              | .....ATT           | <b>GTACTCGTAT</b>  | <b>CTTTGGGTGC</b> | <b>CATTTATCCC</b>  |
| SIMLO1_ROOT         | .....              | .....ATT           | <b>GTACTCGTAT</b>  | <b>CTTTGGGTGC</b> | <b>CATTTATCCC</b>  |
| SIMLO1_FLOWER       | .....              | .....ATT           | <b>GTACTCGTAT</b>  | <b>CTTTGGGTGC</b> | <b>CATTTATCCC</b>  |
|                     |                    | 4,020              |                    | 4,040             |                    |
| gDNA_Solyc04g049090 | <b>ACTTGTAAGTA</b> | <b>AGTTTCATTAT</b> | <b>TAATTCATTA</b>  | <b>ATAATAAGAG</b> | <b>TAATAAGTAT</b>  |
| cDNA_Solyc04g049090 | <b>ACTTGTA</b>     | .....              | .....              | .....             | .....              |
| SIMLO1_LEAF         | <b>ACTTGTA</b>     | .....              | .....              | .....             | .....              |
| SIMLO1_ROOT         | <b>ACTTGTA</b>     | .....              | .....              | .....             | .....              |
| SIMLO1_FLOWER       | <b>ACTTGTA</b>     | .....              | .....              | .....             | .....              |
|                     |                    | 4,060              |                    | 4,080             |                    |
| gDNA_Solyc04g049090 | <b>GTTCATGATT</b>  | <b>GACTAAAGTA</b>  | <b>TAAAATGAAA</b>  | <b>TTGAATTAAT</b> | <b>GAAAATGCAG</b>  |
| cDNA_Solyc04g049090 | .....              | .....              | .....              | .....             | .....              |
| SIMLO1_LEAF         | .....              | .....              | .....              | .....             | .....              |
| SIMLO1_ROOT         | .....              | .....              | .....              | .....             | .....              |
| SIMLO1_FLOWER       | .....              | .....              | .....              | .....             | .....              |
|                     |                    | 4,120              |                    | 4,140             |                    |
| gDNA_Solyc04g049090 | <b>ATAATATTGC</b>  | <b>TAGTTGGCAC</b>  | <b>AAAAC TTCAA</b> | <b>ATGATCATAA</b> | <b>CAGAAA TGGG</b> |
| cDNA_Solyc04g049090 | <b>ATAATATTGC</b>  | <b>TAGTTGGCAC</b>  | <b>AAAAC TTCAA</b> | <b>ATGATCATAA</b> | <b>CAGAAA TGGG</b> |
| SIMLO1_LEAF         | <b>ATAATATTGC</b>  | <b>TAGTTGGCAC</b>  | <b>AAAAC TTCAA</b> | <b>ATGATCATAA</b> | <b>CAGAAA TGGG</b> |
| SIMLO1_ROOT         | <b>ATAATATTGC</b>  | <b>TAGTTGGCAC</b>  | <b>AAAAC TTCAA</b> | <b>ATGATCATAA</b> | <b>CAGAAA TGGG</b> |
| SIMLO1_FLOWER       | <b>ATAATATTGC</b>  | <b>TAGTTGGCAC</b>  | <b>AAAAC TTCAA</b> | <b>ATGATCATAA</b> | <b>CAGAAA TGGG</b> |
|                     |                    | 4,160              |                    | 4,180             |                    |
| gDNA_Solyc04g049090 | <b>AGTAAGGATT</b>  | <b>TCAGAAAGGG</b>  | <b>GAGACATAGT</b>  | <b>AAAAGGTGTA</b> | <b>CCTGTGGTGG</b>  |
| cDNA_Solyc04g049090 | <b>AGTAAGGATT</b>  | <b>TCAGAAAGGG</b>  | <b>GAGACATAGT</b>  | <b>AAAAGGTGTA</b> | <b>CCTGTGGTGG</b>  |
| SIMLO1_LEAF         | <b>AGTAAGGATT</b>  | <b>TCAGAAAGGG</b>  | <b>GAGACATAGT</b>  | <b>AAAAGGTGTA</b> | <b>CCTGTGGTGG</b>  |
| SIMLO1_ROOT         | <b>AGTAAGGATT</b>  | <b>TCAGAAAGGG</b>  | <b>GAGACATAGT</b>  | <b>AAAAGGTGTA</b> | <b>CCTGTGGTGG</b>  |
| SIMLO1_FLOWER       | <b>AGTAAGGATT</b>  | <b>TCAGAAAGGG</b>  | <b>GAGACATAGT</b>  | <b>AAAAGGTGTA</b> | <b>CCTGTGGTGG</b>  |

|                     |                  |                   |                   |                   |                          |                 |
|---------------------|------------------|-------------------|-------------------|-------------------|--------------------------|-----------------|
|                     |                  | 4,220             |                   | 4,240             |                          |                 |
| gDNA_Solyc04g049090 | AGACTGGTGA       | CCATCTTTTC        | TGGTTAAATC        | GCCC TGCCCT       | TGTCCTATT C 4250         |                 |
| cDNA_Solyc04g049090 | AGACTGGTGA       | CCATCTTTTC        | TGGTTAAATC        | GCCC TGCCCT       | TGTCCTATT C 1183         |                 |
| SIMLO1_LEAF         | AGACTGGTGA       | CCATCTTTTC        | TGGTTAAATC        | GCCC TGCCCT       | TGTCCTATT C 987          |                 |
| SIMLO1_ROOT         | AGACTGGTGA       | CCATCTTTTC        | TGGTTAAATC        | GCCC TGCCCT       | TGTCCTATT C 987          |                 |
| SIMLO1_FLOWER       | AGACTGGTGA       | CCATCTTTTC        | TGGTTAAATC        | GCCC TGCCCT       | TGTCCTATT C 987          |                 |
|                     | 4,260            |                   | 4,280             |                   | 4,300                    |                 |
| gDNA_Solyc04g049090 | TTGATTAAC T      | TTGTACTCT T       | TCAGGTACCC        | TTTTTTAAAC        | TCTCACTTAC 4300          |                 |
| cDNA_Solyc04g049090 | TTGATTAAC T      | TTGTACTCT T       | TCAG              | -----             | ----- 1207               |                 |
| SIMLO1_LEAF         | TTGATTAAC T      | TTGTACTCT T       | TCAG              | -----             | ----- 1011               |                 |
| SIMLO1_ROOT         | TTGATTAAC T      | TTGTACTCT T       | TCAG              | -----             | ----- 1011               |                 |
| SIMLO1_FLOWER       | TTGATTAAC T      | TTGTACTCT T       | TCAG              | -----             | ----- 1011               |                 |
|                     |                  | 4,320             |                   | 4,340             |                          |                 |
| gDNA_Solyc04g049090 | TTTTATTTTT       | AGTTGATCGA        | TTTATATATA        | AAAAGAATCA        | TCTATTATT T 4350         |                 |
| cDNA_Solyc04g049090 | -----            | -----             | -----             | -----             | ----- 1207               |                 |
| SIMLO1_LEAF         | -----            | -----             | -----             | -----             | ----- 1011               |                 |
| SIMLO1_ROOT         | -----            | -----             | -----             | -----             | ----- 1011               |                 |
| SIMLO1_FLOWER       | -----            | -----             | -----             | -----             | ----- 1011               |                 |
|                     | 4,360            |                   | 4,380             |                   | 4,400                    |                 |
| gDNA_Solyc04g049090 | CTTTTTCATA       | TATTAATTTA        | TGATGATCAC        | AAAATTGAAA        | AGAAAAACTA 4400          |                 |
| cDNA_Solyc04g049090 | -----            | -----             | -----             | -----             | ----- 1207               |                 |
| SIMLO1_LEAF         | -----            | -----             | -----             | -----             | ----- 1011               |                 |
| SIMLO1_ROOT         | -----            | -----             | -----             | -----             | ----- 1011               |                 |
| SIMLO1_FLOWER       | -----            | -----             | -----             | -----             | ----- 1011               |                 |
|                     |                  | 4,420             |                   | 4,440             |                          |                 |
| gDNA_Solyc04g049090 | TGTAATTTTT       | TTTTAAAAAA        | AAATAAACGA        | AAAGAGTATA        | TAAAATCGGT 4450          |                 |
| cDNA_Solyc04g049090 | -----            | -----             | -----             | -----             | ----- 1207               |                 |
| SIMLO1_LEAF         | -----            | -----             | -----             | -----             | ----- 1011               |                 |
| SIMLO1_ROOT         | -----            | -----             | -----             | -----             | ----- 1011               |                 |
| SIMLO1_FLOWER       | -----            | -----             | -----             | -----             | ----- 1011               |                 |
|                     | 4,460            |                   | 4,480             |                   | 4,500                    |                 |
| gDNA_Solyc04g049090 | ACAAACTCCT       | AAC TTGGAAT       | CTCATAATGA        | TTTTTTTTTT        | GGTTTGGCAG 4500          |                 |
| cDNA_Solyc04g049090 | -----            | -----             | -----             | -----             | ----- 1207               |                 |
| SIMLO1_LEAF         | -----            | -----             | -----             | -----             | ----- 1011               |                 |
| SIMLO1_ROOT         | -----            | -----             | -----             | -----             | ----- 1011               |                 |
| SIMLO1_FLOWER       | -----            | -----             | -----             | -----             | ----- 1011               |                 |
|                     |                  | 4,520             |                   | 4,540             |                          |                 |
| gDNA_Solyc04g049090 | AA T GCG T T T C | AAG T T G C T T T | C T T T T T T G G | A G T T G G T A A | G G A G T T G G A T 4550 |                 |
| cDNA_Solyc04g049090 | AA T GCG T T T C | AAG T T G C T T T | C T T T T T T G G | A G T T G G       | ----- 1243               |                 |
| SIMLO1_LEAF         | AA T GCG T T T C | AAG T T G C T T T | C T T T T T T G G | A G T T G G       | ----- 1047               |                 |
| SIMLO1_ROOT         | AA T GCG T T T C | AAG T T G C T T T | C T T T T T T G G | A G T T G G       | ----- 1047               |                 |
| SIMLO1_FLOWER       | AA T GCG T T T C | AAG T T G C T T T | C T T T T T T G G | A G T T G G       | ----- 1047               |                 |
|                     | 4,560            |                   | 4,580             |                   | 4,600                    |                 |
| gDNA_Solyc04g049090 | TTCCATTTTT       | CCTTTTTTTC        | TTTTGGAATG        | AAATTTAAAT        | ATATTGTCCT 4600          |                 |
| cDNA_Solyc04g049090 | -----            | -----             | -----             | -----             | ----- 1243               |                 |
| SIMLO1_LEAF         | -----            | -----             | -----             | -----             | ----- 1047               |                 |
| SIMLO1_ROOT         | -----            | -----             | -----             | -----             | ----- 1047               |                 |
| SIMLO1_FLOWER       | -----            | -----             | -----             | -----             | ----- 1047               |                 |
|                     |                  | 4,620             |                   | 4,640             |                          |                 |
| gDNA_Solyc04g049090 | GAATATTTTT       | TTTTCTTCA         | AATTTTCAGT        | GGAAATTTGG        | TTTCCCATCT 4650          |                 |
| cDNA_Solyc04g049090 | -----            | -----             | -----             | -----T            | GGAAATTTGG               | TTTCCCATCT 1264 |
| SIMLO1_LEAF         | -----            | -----             | -----             | -----T            | GGAAATTTGG               | TTTCCCATCT 1068 |
| SIMLO1_ROOT         | -----            | -----             | -----             | -----T            | GGAAATTTGG               | TTTCCCATCT 1068 |
| SIMLO1_FLOWER       | -----            | -----             | -----             | -----T            | GGAAATTTGG               | TTTCCCATCT 1068 |
|                     | 4,660            |                   | 4,680             |                   | 4,700                    |                 |
| gDNA_Solyc04g049090 | TGCTTTTCATA      | AGAATGCTGC        | AGACCTAGCC        | ATAAGGCTAA        | CCATGGGGTG 4700          |                 |
| cDNA_Solyc04g049090 | TGCTTTTCATA      | AGAATGCTGC        | AGACC TAGCC       | ATAAGGC TAA       | CCATGGGG -- 1312         |                 |
| SIMLO1_LEAF         | TGCTTTTCATA      | AGAATGCTGC        | AGACC TAGCC       | ATAAGGC TAA       | CCATGGGG -- 1116         |                 |
| SIMLO1_ROOT         | TGCTTTTCATA      | AGAATGCTGC        | AGACC TAGCC       | ATAAGGC TAA       | CCATGGGG -- 1116         |                 |
| SIMLO1_FLOWER       | TGCTTTTCATA      | AGAATGCTGC        | AGACC TAGCC       | ATAAGGC TAA       | CCATGGGG -- 1116         |                 |
|                     |                  | 4,720             |                   | 4,740             |                          |                 |
| gDNA_Solyc04g049090 | AGTTTCACTT       | GCAACTAAAA        | AACACAGACA        | CATTACACTT        | TTAAACTCTC 4750          |                 |
| cDNA_Solyc04g049090 | -----            | -----             | -----             | -----             | ----- 1312               |                 |
| SIMLO1_LEAF         | -----            | -----             | -----             | -----             | ----- 1116               |                 |
| SIMLO1_ROOT         | -----            | -----             | -----             | -----             | ----- 1116               |                 |
| SIMLO1_FLOWER       | -----            | -----             | -----             | -----             | ----- 1116               |                 |
|                     | 4,760            |                   | 4,780             |                   | 4,800                    |                 |
| gDNA_Solyc04g049090 | ACCTGTTTCA       | GATAAAAAAT        | TTCAAAAGTC        | TTTCATTGTT        | TCTTAAAGTT 4800          |                 |
| cDNA_Solyc04g049090 | -----            | -----             | -----             | -----             | ----- 1312               |                 |
| SIMLO1_LEAF         | -----            | -----             | -----             | -----             | ----- 1116               |                 |
| SIMLO1_ROOT         | -----            | -----             | -----             | -----             | ----- 1116               |                 |
| SIMLO1_FLOWER       | -----            | -----             | -----             | -----             | ----- 1116               |                 |
|                     |                  | 4,820             |                   | 4,840             |                          |                 |
| gDNA_Solyc04g049090 | TATGTCAAGT       | CAAAACATTA        | TGGAAGTTGA        | TGCATATATA        | TATTCAGGGT 4850          |                 |
| cDNA_Solyc04g049090 | -----            | -----             | -----             | -----             | -----GT 1314             |                 |
| SIMLO1_LEAF         | -----            | -----             | -----             | -----             | -----GT 1118             |                 |
| SIMLO1_ROOT         | -----            | -----             | -----             | -----             | -----GT 1118             |                 |
| SIMLO1_FLOWER       | -----            | -----             | -----             | -----             | -----GT 1118             |                 |
|                     | 4,860            |                   | 4,880             |                   | 4,900                    |                 |
| gDNA_Solyc04g049090 | GATCATACAG       | GTCCATTGCA        | GCTATGTGAC        | TCTCCCTCTT        | TATGCCTTAG 4900          |                 |
| cDNA_Solyc04g049090 | GATCATACAG       | GTCCATTGCA        | GCTATGTGAC        | TCTCCCTCTT        | TATGCCTTAG 1364          |                 |
| SIMLO1_LEAF         | GATCATACAG       | GTCCATTGCA        | GCTATGTGAC        | TCTCCCTCTT        | TATGCCTTAG 1168          |                 |
| SIMLO1_ROOT         | GATCATACAG       | GTCCATTGCA        | GCTATGTGAC        | TCTCCCTCTT        | TATGCCTTAG 1168          |                 |
| SIMLO1_FLOWER       | GATCATACAG       | GTCCATTGCA        | GCTATGTGAC        | TCTCCCTCTT        | TATGCCTTAG 1168          |                 |

|                     |                    |                   |                    |                    |                   |      |
|---------------------|--------------------|-------------------|--------------------|--------------------|-------------------|------|
|                     |                    |                   | 4,920              |                    | 4,940             |      |
| gDNA_Solyc04g049090 | <b>TTACACAGGT</b>  | <b>AGGTACTCTG</b> | <b>ATCTACATTA</b>  | <b>TGAAAATGTT</b>  | <b>ATATATATAT</b> | 4950 |
| cDNA_Solyc04g049090 | <b>TTACACAG</b>    | ---               | ---                | ---                | ---               | 1372 |
| SIMLO1_LEAF         | <b>TTACACAG</b>    | ---               | ---                | ---                | ---               | 1176 |
| SIMLO1_ROOT         | <b>TTACACAG</b>    | ---               | ---                | ---                | ---               | 1176 |
| SIMLO1_FLOWER       | <b>TTACACAG</b>    | ---               | ---                | ---                | ---               | 1176 |
|                     | 4,960              |                   | 4,980              |                    | 5,000             |      |
| gDNA_Solyc04g049090 | <b>ATATATATAT</b>  | <b>ATATATATAT</b> | <b>ATATATATAC</b>  | <b>TTATATAGAG</b>  | <b>AAATTCTGTA</b> | 5000 |
| cDNA_Solyc04g049090 | ---                | ---               | ---                | ---                | ---               | 1372 |
| SIMLO1_LEAF         | ---                | ---               | ---                | ---                | ---               | 1176 |
| SIMLO1_ROOT         | ---                | ---               | ---                | ---                | ---               | 1176 |
| SIMLO1_FLOWER       | ---                | ---               | ---                | ---                | ---               | 1176 |
|                     |                    | 5,020             |                    | 5,040              |                   |      |
| gDNA_Solyc04g049090 | <b>GATGGGTTCA</b>  | <b>TCAATGAAGC</b> | <b>CTATCATCTT</b>  | <b>TGGTGATAAT</b>  | <b>GTGGCAACAG</b> | 5050 |
| cDNA_Solyc04g049090 | <b>-ATGGGTTCA</b>  | <b>TCAATGAAGC</b> | <b>CTATCATCTT</b>  | <b>TGGTGATAAT</b>  | <b>GTGGCAACAG</b> | 1421 |
| SIMLO1_LEAF         | <b>-ATGGGTTCA</b>  | <b>TCAATGAAGC</b> | <b>CTATCATCTT</b>  | <b>TGGTGATAAT</b>  | <b>GTGGCAACAG</b> | 1225 |
| SIMLO1_ROOT         | <b>-ATGGGTTCA</b>  | <b>TCAATGAAGC</b> | <b>CTATCATCTT</b>  | <b>TGGTGATAAT</b>  | <b>GTGGCAACAG</b> | 1225 |
| SIMLO1_FLOWER       | ---                | ---               | ---                | ---                | ---               | 1176 |
|                     | 5,060              |                   | 5,080              |                    | 5,100             |      |
| gDNA_Solyc04g049090 | <b>CTCTTAGAAG</b>  | <b>CTGGCACCAT</b> | <b>ACAGCGAAAA</b>  | <b>AACGGGTGAA</b>  | <b>ACATGGGCTA</b> | 5100 |
| cDNA_Solyc04g049090 | <b>CTCTTAGAAG</b>  | <b>CTGGCACCAT</b> | <b>ACAGCGAAAA</b>  | <b>AACGGGTGAA</b>  | <b>ACATGGGCTA</b> | 1471 |
| SIMLO1_LEAF         | <b>CTCTTAGAAG</b>  | <b>CTGGCACCAT</b> | <b>ACAGCGAAAA</b>  | <b>AACGGGTGAA</b>  | <b>ACATGGGCTA</b> | 1275 |
| SIMLO1_ROOT         | <b>CTCTTAGAAG</b>  | <b>CTGGCACCAT</b> | <b>ACAGCGAAAA</b>  | <b>AACGGGTGAA</b>  | <b>ACATGGGCTA</b> | 1275 |
| SIMLO1_FLOWER       | <b>CTCTTAGAAG</b>  | <b>CTGGCACCAT</b> | <b>ACAGCGAAAA</b>  | <b>AACGGGTGAA</b>  | <b>ACATGGGCTA</b> | 1226 |
|                     |                    | 5,120             |                    | 5,140              |                   |      |
| gDNA_Solyc04g049090 | <b>TCAGGACATA</b>  | <b>CCACCC TGC</b> | <b>AAACAGCAGA</b>  | <b>CCAACCCACAC</b> | <b>CATTGCGTGG</b> | 5150 |
| cDNA_Solyc04g049090 | <b>TCAGGACATA</b>  | <b>CCACCC TGC</b> | <b>AAACAGCAGA</b>  | <b>CCAACCCACAC</b> | <b>CATTGCGTGG</b> | 1521 |
| SIMLO1_LEAF         | <b>TCAGGACATA</b>  | <b>CCACCC TGC</b> | <b>AAACAGCAGA</b>  | <b>CCAACCCACAC</b> | <b>CATTGCGTGG</b> | 1325 |
| SIMLO1_ROOT         | <b>TCAGGACATA</b>  | <b>CCACCC TGC</b> | <b>AAACAGCAGA</b>  | <b>CCAACCCACAC</b> | <b>CATTGCGTGG</b> | 1325 |
| SIMLO1_FLOWER       | <b>TCAGGACATA</b>  | <b>CCACCC TGC</b> | <b>AAACAGCAGA</b>  | <b>CCAACCCACAC</b> | <b>CATTGCGTGG</b> | 1276 |
|                     | 5,160              |                   | 5,180              |                    | 5,200             |      |
| gDNA_Solyc04g049090 | <b>TACCTCCCTT</b>  | <b>GTTCACTTAT</b> | <b>TACGCGGTTA</b>  | <b>TCCACAATAT</b>  | <b>AATGAGGACA</b> | 5200 |
| cDNA_Solyc04g049090 | <b>TACCTCCCTT</b>  | <b>GTTCACTTAT</b> | <b>TACGCGGTTA</b>  | <b>TCCACAATAT</b>  | <b>AATGAGGACA</b> | 1571 |
| SIMLO1_LEAF         | <b>TACCTCCCTT</b>  | <b>GTTCACTTAT</b> | <b>TACGCGGTTA</b>  | <b>TCCACAATAT</b>  | <b>AATGAGGACA</b> | 1375 |
| SIMLO1_ROOT         | <b>TACCTCCCTT</b>  | <b>GTTCACTTCT</b> | <b>TACGCGGTTA</b>  | <b>TCCACAATAT</b>  | <b>AATGAGGACA</b> | 1375 |
| SIMLO1_FLOWER       | <b>TACCTCCCTT</b>  | <b>GTTCACTTAT</b> | <b>TACGCGGTTA</b>  | <b>TCCACAATAT</b>  | <b>AATGAGGACA</b> | 1326 |
|                     |                    | 5,220             |                    | 5,240              |                   |      |
| gDNA_Solyc04g049090 | <b>GTGTTCAAGC</b>  | <b>ATCTCCTCGG</b> | <b>ACATCCAATG</b>  | <b>TCGAAAATGA</b>  | <b>AGGGTGGGCT</b> | 5250 |
| cDNA_Solyc04g049090 | <b>GTGTTCAAGC</b>  | <b>ATCTCCTCGG</b> | <b>ACATCCAATG</b>  | <b>TCGAAAATGA</b>  | <b>AGGGTGGGCT</b> | 1621 |
| SIMLO1_LEAF         | <b>GTGTTCAAGC</b>  | <b>ATCTCCTCGG</b> | <b>ACATCCAATG</b>  | <b>TCGAAAATGA</b>  | <b>AGGGTGGGCT</b> | 1425 |
| SIMLO1_ROOT         | <b>GTGTTCAAGC</b>  | <b>ATCTCCTCGG</b> | <b>ACATCCAATG</b>  | <b>TCGAAAATGA</b>  | <b>AGGGTGGGCT</b> | 1425 |
| SIMLO1_FLOWER       | <b>GTGTTCAAGC</b>  | <b>ATCTCCTCGG</b> | <b>ACATCCAATG</b>  | <b>TCGAAAATGA</b>  | <b>AGGGTGGGCT</b> | 1376 |
|                     | 5,260              |                   | 5,280              |                    | 5,300             |      |
| gDNA_Solyc04g049090 | <b>AATGAAAA TC</b> | <b>AGGAGGGAGA</b> | <b>GATCCTGCAG</b>  | <b>CATGCCTCCA</b>  | <b>CTGATCATAA</b> | 5300 |
| cDNA_Solyc04g049090 | <b>AATGAAAA TC</b> | <b>AGGAGGGAGA</b> | <b>GATCCTGCAG</b>  | <b>CATGCCTCCA</b>  | <b>CTGATCATAA</b> | 1671 |
| SIMLO1_LEAF         | <b>AATGAAAA TC</b> | <b>AGGAGGGAGA</b> | <b>GATCCTGCAG</b>  | <b>CATGCCTCCA</b>  | <b>CTGATCATAA</b> | 1475 |
| SIMLO1_ROOT         | <b>AATGAAAA TC</b> | <b>AGGAGGGAGA</b> | <b>GATCCTGCAG</b>  | <b>CATGCCTCCA</b>  | <b>CTGATCATAA</b> | 1475 |
| SIMLO1_FLOWER       | <b>AATGAAAA TC</b> | <b>AGGAGGGAGA</b> | <b>GATCCTGCAG</b>  | <b>CATGCCTCCA</b>  | <b>CTGATCATAA</b> | 1426 |
|                     |                    | 5,320             |                    | 5,340              |                   |      |
| gDNA_Solyc04g049090 | <b>CAAGCAAA TT</b> | <b>GAGATTACAA</b> | <b>TGTCAGATTT</b>  | <b>TACTTTTGGG</b>  | <b>AACAAA TAA</b> | 5350 |
| cDNA_Solyc04g049090 | <b>CAAGCAAA TT</b> | <b>GAGATTACAA</b> | <b>TGTCAGATTT</b>  | <b>TACTTTTGGG</b>  | <b>AACAAA TAA</b> | 1721 |
| SIMLO1_LEAF         | <b>CAAGCAAA TT</b> | <b>GAGATTACAA</b> | <b>TGTCAGATTT</b>  | <b>TACTTTTGGG</b>  | <b>AACAAA TAA</b> | 1524 |
| SIMLO1_ROOT         | <b>CAAGCAAA TT</b> | <b>GAGATTACAA</b> | <b>TGTCAGATTT</b>  | <b>TACTTTTGGG</b>  | <b>AACAAA TAA</b> | 1524 |
| SIMLO1_FLOWER       | <b>CAAGCAAA TT</b> | <b>GAGATTACAA</b> | <b>TGTCAGATTT</b>  | <b>TACTTTTGGG</b>  | <b>AACAAA TAA</b> | 1475 |
|                     | 5,360              |                   | 5,380              |                    | 5,400             |      |
| gDNA_Solyc04g049090 | <b>TGTAAAAACG</b>  | <b>AATTTTCTTC</b> | <b>TTCATTGTTT</b>  | <b>TAAGTTCATT</b>  | <b>ACTGTAGTTC</b> | 5400 |
| cDNA_Solyc04g049090 | <b>TGTAAAAACG</b>  | <b>AATTTTCTTC</b> | <b>TTCATTGTTT</b>  | <b>TAAGTTCATT</b>  | <b>ACTGTAGTTC</b> | 1771 |
| SIMLO1_LEAF         | ---                | ---               | ---                | ---                | ---               | 1524 |
| SIMLO1_ROOT         | ---                | ---               | ---                | ---                | ---               | 1524 |
| SIMLO1_FLOWER       | ---                | ---               | ---                | ---                | ---               | 1475 |
|                     |                    | 5,420             |                    | 5,440              |                   |      |
| gDNA_Solyc04g049090 | <b>AAATGGCAAT</b>  | <b>GATTTTGTAA</b> | <b>AAATTTTATAC</b> | <b>AGAGGTACTC</b>  | <b>ATGCATGGTG</b> | 5450 |
| cDNA_Solyc04g049090 | <b>AAATGGCAAT</b>  | <b>GATTTTGTAA</b> | <b>AAATTTTATAC</b> | <b>AGAGGTACTC</b>  | <b>ATGCATGGTG</b> | 1821 |
| SIMLO1_LEAF         | ---                | ---               | ---                | ---                | ---               | 1524 |
| SIMLO1_ROOT         | ---                | ---               | ---                | ---                | ---               | 1524 |
| SIMLO1_FLOWER       | ---                | ---               | ---                | ---                | ---               | 1475 |
|                     | 5,460              |                   | 5,480              |                    | 5,500             |      |
| gDNA_Solyc04g049090 | <b>CTCTTCATTT</b>  | <b>CAAGGTAAGA</b> | <b>ACCTTCTTAT</b>  | <b>ATCGATTTAT</b>  | <b>AGCTACTTTA</b> | 5500 |
| cDNA_Solyc04g049090 | <b>CTCTTCATTT</b>  | <b>CAAGGTAAGA</b> | <b>ACCTTCTTAT</b>  | <b>ATCGATTTAT</b>  | <b>AGCTACTTTA</b> | 1871 |
| SIMLO1_LEAF         | ---                | ---               | ---                | ---                | ---               | 1524 |
| SIMLO1_ROOT         | ---                | ---               | ---                | ---                | ---               | 1524 |
| SIMLO1_FLOWER       | ---                | ---               | ---                | ---                | ---               | 1475 |
| gDNA_Solyc04g049090 | <b>CATCTCA</b>     |                   |                    |                    |                   | 5507 |
| cDNA_Solyc04g049090 | <b>CATCTCA</b>     |                   |                    |                    |                   | 1878 |
| SIMLO1_LEAF         | ---                |                   |                    |                    |                   | 1524 |
| SIMLO1_ROOT         | ---                |                   |                    |                    |                   | 1524 |
| SIMLO1_FLOWER       | ---                |                   |                    |                    |                   | 1475 |



```

gDNA_Solyc03g095650 <TATATTTAAA ATATAAAGTC TTTGTTTTTT CTCAAAGAAG TCTCTCACA 50
cDNA_Solyc03g095650 <TATATTTAAA ATATAAAGTC TTTGTTTTTT CTCAAAGAAG TCTCTCACA 50
SIMLO5_LEAF <-----
SIMLO5_FLOWER -----
SIMLO5_FRUIT -----

gDNA_Solyc03g095650 AATTCCTTA TCATTA AAAA CAAAAA GTTGTATAGT ACTGAAGCTT 100
cDNA_Solyc03g095650 AATTCCTTA TCATTA AAAA CAAAAA GTTGTATAGT ACTGAAGCTT 100
SIMLO5_LEAF -----
SIMLO5_FLOWER -----
SIMLO5_FRUIT -----

gDNA_Solyc03g095650 AATGGCTAGC ACAGGCTGTA TTAGAACGTG TGATGAACGT CCTCTAGATG 150
cDNA_Solyc03g095650 AATGGCTAGC ACAGGCTGTA TTAGAACGTG TGATGAACGT CCTCTAGATG 150
SIMLO5_LEAF -ATGGCTAGC ACAGGCTGTA TTAGAACGTG TGATGAACGT CCTCTAGATG 49
SIMLO5_FLOWER -ATGGCTAGC ACAGGCTGTA TTAGAACGTG TGATGAACGT CCTCTAGATG 49
SIMLO5_FRUIT -ATGGCTAGC ACAGGCTGTA TTAGAACGTG TGATGAACGT CCTCTAGATG 49

gDNA_Solyc03g095650 AGACACCAAC ATGGGCTGTA GCCATGGTTT GCTTTGTATT AGTTGTAATC 200
cDNA_Solyc03g095650 AGACACCAAC ATGGGCTGTA GCCATGGTTT GCTTTGTATT AGTTGTAATC 200
SIMLO5_LEAF AGACACCAAC ATGGGCTGTA GCCATGGTTT GCTTTGTATT AGTTGTAATC 99
SIMLO5_FLOWER AGACACCAAC ATGGGCTGTA GCCATGGTTT GCTTTGTATT AGTTGTAATC 99
SIMLO5_FRUIT AGACACCAAC ATGGGCTGTA GCCATGGTTT GCTTTGTATT AGTTGTAATC 99

gDNA_Solyc03g095650 TCCCTTTTCA TTGAACAAC TATTTCATCAT CTTGGAGAGG TAAACATTCA 250
cDNA_Solyc03g095650 TCCCTTTTCA TTGAACAAC TATTTCATCAT CTTGGAGAG - 239
SIMLO5_LEAF TCCCTTTTCA TTGAACAAC TATTTCATCAT CTTGGAGAG - 138
SIMLO5_FLOWER TCCCTTTTCA TTGAACAAC TATTTCATCAT CTTGGAGAG - 138
SIMLO5_FRUIT TCCCTTTTCA TTGAACAAC TATTTCATCAT CTTGGAGAG - 138

gDNA_Solyc03g095650 TTTACCTTTC ATATTTTTAT ATATGTTTGA ATCACAAAT TATATGTTGC 300
cDNA_Solyc03g095650 ----- 239
SIMLO5_LEAF ----- 138
SIMLO5_FLOWER ----- 138
SIMLO5_FRUIT ----- 138

gDNA_Solyc03g095650 CTTTTGATGA TTTGTGTTTA TACAAGTCCA TGCTGCTATC AGTGAGGAAA 350
cDNA_Solyc03g095650 ----- 239
SIMLO5_LEAF ----- 138
SIMLO5_FLOWER ----- 138
SIMLO5_FRUIT ----- 138

gDNA_Solyc03g095650 ACACAAATTT TTAGTGAGG GGGGACCAA ATGTTTTAAG AGGAAAAGTA 400
cDNA_Solyc03g095650 ----- 239
SIMLO5_LEAF ----- 138
SIMLO5_FLOWER ----- 138
SIMLO5_FRUIT ----- 138

gDNA_Solyc03g095650 GCAAGGAGCA AAAC TAAAA ACTTCTATAT GCAATTTTGT TTAGGTAAA 450
cDNA_Solyc03g095650 ----- 239
SIMLO5_LEAF ----- 138
SIMLO5_FLOWER ----- 138
SIMLO5_FRUIT ----- 138

gDNA_Solyc03g095650 TATAGTATAA TATCATATTA ACGTACAGAG TTGTTAATAT GGACCAACTT 500
cDNA_Solyc03g095650 ----- 239
SIMLO5_LEAF ----- 138
SIMLO5_FLOWER ----- 138
SIMLO5_FRUIT ----- 138

gDNA_Solyc03g095650 TCCTCAGCTT ATGCCGTGGC TTTGAAATTT GACGAGCTAA TTGGACCAGC 550
cDNA_Solyc03g095650 ----- 239
SIMLO5_LEAF ----- 138
SIMLO5_FLOWER ----- 138
SIMLO5_FRUIT ----- 138

gDNA_Solyc03g095650 TCACTATTTT AATAGGCCTT AAAATAGTCA ACCCCAGTAT TATGTGGGCA 600
cDNA_Solyc03g095650 ----- 239
SIMLO5_LEAF ----- 138
SIMLO5_FLOWER ----- 138
SIMLO5_FRUIT ----- 138

gDNA_Solyc03g095650 GTGGATTAGG GCTATTGGTT CATCATTTTT TCAAACGTA TTCTTTTAA 650
cDNA_Solyc03g095650 ----- 239
SIMLO5_LEAF ----- 138
SIMLO5_FLOWER ----- 138
SIMLO5_FRUIT ----- 138

gDNA_Solyc03g095650 CTCTTTTCGT TTCACAAAGA ATGACCTGAT TTGACTTGAT GCGGAGTTAA 700
cDNA_Solyc03g095650 ----- 239
SIMLO5_LEAF ----- 138
SIMLO5_FLOWER ----- 138
SIMLO5_FRUIT ----- 138

```

|                     |                    |                   |                   |                   |                   |
|---------------------|--------------------|-------------------|-------------------|-------------------|-------------------|
|                     |                    | 720               |                   | 740               |                   |
| gDNA_Solyc03g095650 | <b>AGAGTATAAA</b>  | <b>TAAGATTTTT</b> | <b>GTATTTTGTG</b> | <b>ATTCTAAATT</b> | <b>AAAGTTGGTT</b> |
| cDNA_Solyc03g095650 | .....              | .....             | .....             | .....             | .....             |
| SIMLO5_LEAF         | .....              | .....             | .....             | .....             | .....             |
| SIMLO5_FLOWER       | .....              | .....             | .....             | .....             | .....             |
| SIMLO5_FRUIT        | .....              | .....             | .....             | .....             | .....             |
|                     |                    | 760               | 780               | 800               |                   |
| gDNA_Solyc03g095650 | <b>AAATGTA AAA</b> | <b>AATTGTTTTT</b> | <b>TGATCTTGTG</b> | <b>GTCTTAAACA</b> | <b>TGTCAGGCAG</b> |
| cDNA_Solyc03g095650 | .....              | .....             | .....             | .....             | .....             |
| SIMLO5_LEAF         | .....              | .....             | .....             | .....             | .....             |
| SIMLO5_FLOWER       | .....              | .....             | .....             | .....             | .....             |
| SIMLO5_FRUIT        | .....              | .....             | .....             | .....             | .....             |
|                     |                    | 820               |                   | 840               |                   |
| gDNA_Solyc03g095650 | <b>AAAGTTGGAA</b>  | <b>TTAAAATATT</b> | <b>ACCAAAAAAG</b> | <b>AAAAAAGTCA</b> | <b>TTATTTTTTA</b> |
| cDNA_Solyc03g095650 | .....              | .....             | .....             | .....             | .....             |
| SIMLO5_LEAF         | .....              | .....             | .....             | .....             | .....             |
| SIMLO5_FLOWER       | .....              | .....             | .....             | .....             | .....             |
| SIMLO5_FRUIT        | .....              | .....             | .....             | .....             | .....             |
|                     |                    | 860               | 880               | 900               |                   |
| gDNA_Solyc03g095650 | <b>TACGAATCAA</b>  | <b>AAAGAAAAGG</b> | <b>AGATCATTCT</b> | <b>TTTTTAATA</b>  | <b>GAGAGAATAT</b> |
| cDNA_Solyc03g095650 | .....              | .....             | .....             | .....             | .....             |
| SIMLO5_LEAF         | .....              | .....             | .....             | .....             | .....             |
| SIMLO5_FLOWER       | .....              | .....             | .....             | .....             | .....             |
| SIMLO5_FRUIT        | .....              | .....             | .....             | .....             | .....             |
|                     |                    | 920               |                   | 940               |                   |
| gDNA_Solyc03g095650 | <b>AATTATTTTA</b>  | <b>ATCCAAACTT</b> | <b>AACATAAAAT</b> | <b>GCAAAAATAT</b> | <b>AAATAATGTA</b> |
| cDNA_Solyc03g095650 | .....              | .....             | .....             | .....             | .....             |
| SIMLO5_LEAF         | .....              | .....             | .....             | .....             | .....             |
| SIMLO5_FLOWER       | .....              | .....             | .....             | .....             | .....             |
| SIMLO5_FRUIT        | .....              | .....             | .....             | .....             | .....             |
|                     |                    | 960               | 980               | 1,000             |                   |
| gDNA_Solyc03g095650 | <b>AGACAATATT</b>  | <b>ACATAACGTA</b> | <b>AAATAAAATA</b> | <b>ATTGAAAAGA</b> | <b>ATACCTTATA</b> |
| cDNA_Solyc03g095650 | .....              | .....             | .....             | .....             | .....             |
| SIMLO5_LEAF         | .....              | .....             | .....             | .....             | .....             |
| SIMLO5_FLOWER       | .....              | .....             | .....             | .....             | .....             |
| SIMLO5_FRUIT        | .....              | .....             | .....             | .....             | .....             |
|                     |                    | 1,020             |                   | 1,040             |                   |
| gDNA_Solyc03g095650 | <b>TTTGTCAATA</b>  | <b>CTTTATGTCC</b> | <b>TTGTCATTGA</b> | <b>CGTCAAGAAT</b> | <b>TTGTTGTCAC</b> |
| cDNA_Solyc03g095650 | .....              | .....             | .....             | .....             | .....             |
| SIMLO5_LEAF         | .....              | .....             | .....             | .....             | .....             |
| SIMLO5_FLOWER       | .....              | .....             | .....             | .....             | .....             |
| SIMLO5_FRUIT        | .....              | .....             | .....             | .....             | .....             |
|                     |                    | 1,060             | 1,080             | 1,100             |                   |
| gDNA_Solyc03g095650 | <b>GTAGTCACAA</b>  | <b>GTAATAAAGT</b> | <b>GGTTAGATTA</b> | <b>TAAGGGTCGT</b> | <b>TTGGTTTGAT</b> |
| cDNA_Solyc03g095650 | .....              | .....             | .....             | .....             | .....             |
| SIMLO5_LEAF         | .....              | .....             | .....             | .....             | .....             |
| SIMLO5_FLOWER       | .....              | .....             | .....             | .....             | .....             |
| SIMLO5_FRUIT        | .....              | .....             | .....             | .....             | .....             |
|                     |                    | 1,120             |                   | 1,140             |                   |
| gDNA_Solyc03g095650 | <b>TAAGAGCAGA</b>  | <b>CTCGAAAGGG</b> | <b>AAGAGCGCGG</b> | <b>TCTTGGGTTT</b> | <b>AGTCTAAAAA</b> |
| cDNA_Solyc03g095650 | .....              | .....             | .....             | .....             | .....             |
| SIMLO5_LEAF         | .....              | .....             | .....             | .....             | .....             |
| SIMLO5_FLOWER       | .....              | .....             | .....             | .....             | .....             |
| SIMLO5_FRUIT        | .....              | .....             | .....             | .....             | .....             |
|                     |                    | 1,160             | 1,180             | 1,200             |                   |
| gDNA_Solyc03g095650 | <b>TTCAATACAT</b>  | <b>CGATAAGGGG</b> | <b>CAGGAATCA</b>  | <b>ATAAACTTT</b>  | <b>GTTTGGTGTT</b> |
| cDNA_Solyc03g095650 | .....              | .....             | .....             | .....             | .....             |
| SIMLO5_LEAF         | .....              | .....             | .....             | .....             | .....             |
| SIMLO5_FLOWER       | .....              | .....             | .....             | .....             | .....             |
| SIMLO5_FRUIT        | .....              | .....             | .....             | .....             | .....             |
|                     |                    | 1,220             |                   | 1,240             |                   |
| gDNA_Solyc03g095650 | <b>TTTTTTAAAT</b>  | <b>TTATGTATAA</b> | <b>CTAATGTATG</b> | <b>CATTAGCATG</b> | <b>TTTAAAGAGG</b> |
| cDNA_Solyc03g095650 | .....              | .....             | .....             | .....             | .....             |
| SIMLO5_LEAF         | .....              | .....             | .....             | .....             | .....             |
| SIMLO5_FLOWER       | .....              | .....             | .....             | .....             | .....             |
| SIMLO5_FRUIT        | .....              | .....             | .....             | .....             | .....             |
|                     |                    | 1,260             | 1,280             | 1,300             |                   |
| gDNA_Solyc03g095650 | <b>TAATTGCCCT</b>  | <b>TAAAACCTTT</b> | <b>TTTTATATCT</b> | <b>TTTGAGGAT</b>  | <b>ATCTTTGTAA</b> |
| cDNA_Solyc03g095650 | .....              | .....             | .....             | .....             | .....             |
| SIMLO5_LEAF         | .....              | .....             | .....             | .....             | .....             |
| SIMLO5_FLOWER       | .....              | .....             | .....             | .....             | .....             |
| SIMLO5_FRUIT        | .....              | .....             | .....             | .....             | .....             |
|                     |                    | 1,320             |                   | 1,340             |                   |
| gDNA_Solyc03g095650 | <b>ATAATTTTTT</b>  | <b>TTATGCAATG</b> | <b>CATGATATTT</b> | <b>TTAATGCATC</b> | <b>AAATCGGACA</b> |
| cDNA_Solyc03g095650 | .....              | .....             | .....             | .....             | .....             |
| SIMLO5_LEAF         | .....              | .....             | .....             | .....             | .....             |
| SIMLO5_FLOWER       | .....              | .....             | .....             | .....             | .....             |
| SIMLO5_FRUIT        | .....              | .....             | .....             | .....             | .....             |
|                     |                    | 1,360             | 1,380             | 1,400             |                   |
| gDNA_Solyc03g095650 | <b>ATATATAAAA</b>  | <b>ATAATCTATG</b> | <b>TAAAATCAAT</b> | <b>ACAAGCATAA</b> | <b>CTAATACATG</b> |
| cDNA_Solyc03g095650 | .....              | .....             | .....             | .....             | .....             |
| SIMLO5_LEAF         | .....              | .....             | .....             | .....             | .....             |
| SIMLO5_FLOWER       | .....              | .....             | .....             | .....             | .....             |
| SIMLO5_FRUIT        | .....              | .....             | .....             | .....             | .....             |

|                     |                   |                   |                   |                    |                    |      |
|---------------------|-------------------|-------------------|-------------------|--------------------|--------------------|------|
|                     |                   | 1,420             |                   | 1,440              |                    |      |
| gDNA_Solyc03g095650 | <b>CATTATTAAG</b> | <b>GCAAACATTA</b> | <b>TTAATACACT</b> | <b>CTATTTAGCA</b>  | <b>TTATTAATCT</b>  | 1450 |
| cDNA_Solyc03g095650 | .....             | .....             | .....             | .....              | .....              | 239  |
| SIMLO5_LEAF         | .....             | .....             | .....             | .....              | .....              | 138  |
| SIMLO5_FLOWER       | .....             | .....             | .....             | .....              | .....              | 138  |
| SIMLO5_FRUIT        | .....             | .....             | .....             | .....              | .....              | 138  |
|                     | 1,460             |                   | 1,480             |                    | 1,500              |      |
| gDNA_Solyc03g095650 | <b>TGTATACTCT</b> | <b>ATTAAGCGAA</b> | <b>CCCTTAAAT</b>  | <b>TGTTACGAGA</b>  | <b>GATATGATAT</b>  | 1500 |
| cDNA_Solyc03g095650 | .....             | .....             | .....             | .....              | .....              | 239  |
| SIMLO5_LEAF         | .....             | .....             | .....             | .....              | .....              | 138  |
| SIMLO5_FLOWER       | .....             | .....             | .....             | .....              | .....              | 138  |
| SIMLO5_FRUIT        | .....             | .....             | .....             | .....              | .....              | 138  |
|                     | 1,520             |                   | 1,540             |                    |                    |      |
| gDNA_Solyc03g095650 | <b>TAAGACCTAA</b> | <b>GGTTATGGCG</b> | <b>CTTGCAATTT</b> | <b>CAATAAAAGT</b>  | <b>GTTATCCCCT</b>  | 1550 |
| cDNA_Solyc03g095650 | .....             | .....             | .....             | .....              | .....              | 239  |
| SIMLO5_LEAF         | .....             | .....             | .....             | .....              | .....              | 138  |
| SIMLO5_FLOWER       | .....             | .....             | .....             | .....              | .....              | 138  |
| SIMLO5_FRUIT        | .....             | .....             | .....             | .....              | .....              | 138  |
|                     | 1,560             |                   | 1,580             |                    | 1,600              |      |
| gDNA_Solyc03g095650 | <b>CTCTCTCTCT</b> | <b>ACAAATATCA</b> | <b>TATGGTTGGC</b> | <b>ATTTTTATAT</b>  | <b>TTCTTAATGT</b>  | 1600 |
| cDNA_Solyc03g095650 | .....             | .....             | .....             | .....              | .....              | 239  |
| SIMLO5_LEAF         | .....             | .....             | .....             | .....              | .....              | 138  |
| SIMLO5_FLOWER       | .....             | .....             | .....             | .....              | .....              | 138  |
| SIMLO5_FRUIT        | .....             | .....             | .....             | .....              | .....              | 138  |
|                     | 1,620             |                   | 1,640             |                    |                    |      |
| gDNA_Solyc03g095650 | <b>TTTTATAGTG</b> | <b>GTTATGGAAG</b> | <b>AAACAAAAGA</b> | <b>GACCATTGTA</b>  | <b>TGAAGCACTT</b>  | 1650 |
| cDNA_Solyc03g095650 | -----TG           | <b>GTTATGGAAG</b> | <b>AAACAAAAGA</b> | <b>GACCA TTGTA</b> | <b>TGAAGCAC TT</b> | 281  |
| SIMLO5_LEAF         | -----TG           | <b>GTTATGGAAG</b> | <b>AAACAAAAGA</b> | <b>GACCA TTGTA</b> | <b>TGAAGCAC TT</b> | 180  |
| SIMLO5_FLOWER       | -----TG           | <b>GTTATGGAAG</b> | <b>AAACAAAAGA</b> | <b>GACCA TTGTA</b> | <b>TGAAGCAC TT</b> | 180  |
| SIMLO5_FRUIT        | -----TG           | <b>GTTATGGAAG</b> | <b>AAACAAAAGA</b> | <b>GACCA TTGTA</b> | <b>TGAAGCAC TT</b> | 180  |
|                     | 1,660             |                   | 1,680             |                    | 1,700              |      |
| gDNA_Solyc03g095650 | <b>GAGAAGATCA</b> | <b>AGTCAGGTAA</b> | <b>AAGAAATTTT</b> | <b>GTTTTTTCAT</b>  | <b>TACAAAATCA</b>  | 1700 |
| cDNA_Solyc03g095650 | <b>GAGAAGATCA</b> | <b>AGTCAG</b>     | -----             | -----              | -----              | 297  |
| SIMLO5_LEAF         | <b>GAGAAGATCA</b> | <b>AGTCAG</b>     | -----             | -----              | -----              | 196  |
| SIMLO5_FLOWER       | <b>GAGAAGATCA</b> | <b>AGTCAG</b>     | -----             | -----              | -----              | 196  |
| SIMLO5_FRUIT        | <b>GAGAAGATCA</b> | <b>AGTCAG</b>     | -----             | -----              | -----              | 196  |
|                     | 1,720             |                   | 1,740             |                    |                    |      |
| gDNA_Solyc03g095650 | <b>TTGATTTTTG</b> | <b>GACTAATAAT</b> | <b>TTTTATTTGT</b> | <b>AAATTTATCG</b>  | <b>TGGTGCAGAA</b>  | 1750 |
| cDNA_Solyc03g095650 | -----             | -----             | -----             | -----              | <b>AA</b>          | 299  |
| SIMLO5_LEAF         | -----             | -----             | -----             | -----              | <b>AA</b>          | 198  |
| SIMLO5_FLOWER       | -----             | -----             | -----             | -----              | <b>AA</b>          | 198  |
| SIMLO5_FRUIT        | -----             | -----             | -----             | -----              | <b>AA</b>          | 198  |
|                     | 1,760             |                   | 1,780             |                    | 1,800              |      |
| gDNA_Solyc03g095650 | <b>CTCATGTTAT</b> | <b>TAGGGTTTAT</b> | <b>ATCCTTATTC</b> | <b>TTGACGGTTG</b>  | <b>TACAGGATCC</b>  | 1800 |
| cDNA_Solyc03g095650 | <b>CTCATGTTAT</b> | <b>TAGGGTTTAT</b> | <b>ATCCTTATTC</b> | <b>TTGACGGTTG</b>  | <b>TACAGGATCC</b>  | 349  |
| SIMLO5_LEAF         | <b>CTCATGTTAT</b> | <b>TAGGGTTTAT</b> | <b>ATCCTTATTC</b> | <b>TTGACGGTTG</b>  | <b>TACAGGATCC</b>  | 248  |
| SIMLO5_FLOWER       | <b>CTCATGTTAT</b> | <b>TAGGGTTTAT</b> | <b>ATCCTTATTC</b> | <b>TTGACGGTTG</b>  | <b>TACAGGATCC</b>  | 248  |
| SIMLO5_FRUIT        | <b>CTCATGTTAT</b> | <b>TAGGGTTTAT</b> | <b>ATCCTTATTC</b> | <b>TTGACGGTTG</b>  | <b>TACAGGATCC</b>  | 248  |
|                     | 1,820             |                   | 1,840             |                    |                    |      |
| gDNA_Solyc03g095650 | <b>TATGTCTAAG</b> | <b>ATATGTATTC</b> | <b>CTAGGAGTGT</b> | <b>TGGACGCTCT</b>  | <b>TGGCATCCAT</b>  | 1850 |
| cDNA_Solyc03g095650 | <b>TATGTCTAAG</b> | <b>ATATGTATTC</b> | <b>CTAGGAGTGT</b> | <b>TGGACGCTCT</b>  | <b>TGGCATCCAT</b>  | 399  |
| SIMLO5_LEAF         | <b>TATGTCTAAG</b> | <b>ATATGTATTC</b> | <b>CTAGGAGTGT</b> | <b>TGGACGCTCT</b>  | <b>TGGCATCCAT</b>  | 298  |
| SIMLO5_FLOWER       | <b>TATGTCTAAG</b> | <b>ATATGTATTC</b> | <b>CTAGGAGTGT</b> | <b>TGGACGCTCT</b>  | <b>TGGCATCCAT</b>  | 298  |
| SIMLO5_FRUIT        | <b>TATGTCTAAG</b> | <b>ATATGTATTC</b> | <b>CTAGGAGTGT</b> | <b>TGGACGCTCT</b>  | <b>TGGCATCCAT</b>  | 298  |
|                     | 1,860             |                   | 1,880             |                    | 1,900              |      |
| gDNA_Solyc03g095650 | <b>GTGACATAAA</b> | <b>CAAACATATT</b> | <b>GATGACCAAT</b> | <b>ATCTCGATCC</b>  | <b>ATGTAGAATT</b>  | 1900 |
| cDNA_Solyc03g095650 | <b>GTGACATAAA</b> | <b>CAAACATATT</b> | <b>GATGACCAAT</b> | <b>ATCTCGATCC</b>  | <b>ATGTAGAATT</b>  | 449  |
| SIMLO5_LEAF         | <b>GTGACATAAA</b> | <b>CAAACATATT</b> | <b>GATGACCAAT</b> | <b>ATCTCGATCC</b>  | <b>ATGTAGAATT</b>  | 348  |
| SIMLO5_FLOWER       | <b>GTGACATAAA</b> | <b>CAAACATATT</b> | <b>GATGACCAAT</b> | <b>ATCTCGATCC</b>  | <b>ATGTAGAATT</b>  | 348  |
| SIMLO5_FRUIT        | <b>GTGACATAAA</b> | <b>CAAACATATT</b> | <b>GATGACCAAT</b> | <b>ATCTCGATCC</b>  | <b>ATGTAGAATT</b>  | 348  |
|                     | 1,920             |                   | 1,940             |                    |                    |      |
| gDNA_Solyc03g095650 | <b>AAGGTATTTT</b> | <b>TTTAAATCGA</b> | <b>AACTCAAAGG</b> | <b>TTACCCCTTT</b>  | <b>CTAAGAGCTT</b>  | 1950 |
| cDNA_Solyc03g095650 | <b>AAGG</b>       | -----             | -----             | -----              | -----              | 453  |
| SIMLO5_LEAF         | <b>AAGG</b>       | -----             | -----             | -----              | -----              | 352  |
| SIMLO5_FLOWER       | <b>AAGG</b>       | -----             | -----             | -----              | -----              | 352  |
| SIMLO5_FRUIT        | <b>AAGG</b>       | -----             | -----             | -----              | -----              | 352  |
|                     | 1,960             |                   | 1,980             |                    | 2,000              |      |
| gDNA_Solyc03g095650 | <b>ACACCCTTTG</b> | <b>TGTTCTCTTG</b> | <b>ATCAAAGACA</b> | <b>TCTCTCTGTC</b>  | <b>AATGGATATA</b>  | 2000 |
| cDNA_Solyc03g095650 | -----             | -----             | -----             | -----              | -----              | 453  |
| SIMLO5_LEAF         | -----             | -----             | -----             | -----              | -----              | 352  |
| SIMLO5_FLOWER       | -----             | -----             | -----             | -----              | -----              | 352  |
| SIMLO5_FRUIT        | -----             | -----             | -----             | -----              | -----              | 352  |
|                     | 2,020             |                   | 2,040             |                    |                    |      |
| gDNA_Solyc03g095650 | <b>ACCCTTTTGG</b> | <b>TATGAATAGT</b> | <b>TTATGGGTTT</b> | <b>GGGCATGGAT</b>  | <b>GTTCTTATTT</b>  | 2050 |
| cDNA_Solyc03g095650 | -----             | -----             | -----             | -----              | -----              | 453  |
| SIMLO5_LEAF         | -----             | -----             | -----             | -----              | -----              | 352  |
| SIMLO5_FLOWER       | -----             | -----             | -----             | -----              | -----              | 352  |
| SIMLO5_FRUIT        | -----             | -----             | -----             | -----              | -----              | 352  |
|                     | 2,060             |                   | 2,080             |                    | 2,100              |      |
| gDNA_Solyc03g095650 | <b>GGACATCTTG</b> | <b>TTTGGGCTAC</b> | <b>TGAATTTATG</b> | <b>TTCTTAATTT</b>  | <b>CTTGGCGTGG</b>  | 2100 |
| cDNA_Solyc03g095650 | -----             | -----             | -----             | -----              | -----              | 453  |
| SIMLO5_LEAF         | -----             | -----             | -----             | -----              | -----              | 352  |
| SIMLO5_FLOWER       | -----             | -----             | -----             | -----              | -----              | 352  |
| SIMLO5_FRUIT        | -----             | -----             | -----             | -----              | -----              | 352  |

|                     |                                                               |       |  |       |      |
|---------------------|---------------------------------------------------------------|-------|--|-------|------|
|                     |                                                               | 2,120 |  | 2,140 |      |
| gDNA_Solyc03g095650 | <b>ATATTGCAG GAATTGTTA TTGAGAATAC TAACCCTCTA GACAACCCAA</b>   |       |  |       | 2150 |
| cDNA_Solyc03g095650 | .....                                                         |       |  |       | 453  |
| SIMLO5_LEAF         | .....                                                         |       |  |       | 352  |
| SIMLO5_FLOWER       | .....                                                         |       |  |       | 352  |
| SIMLO5_FRUIT        | .....                                                         |       |  |       | 352  |
|                     |                                                               | 2,180 |  | 2,200 |      |
| gDNA_Solyc03g095650 | <b>CCTCTAAATT TTACTTACTA TAAAAGTAAA GACACAAATC TAAACTCTAG</b> |       |  |       | 2200 |
| cDNA_Solyc03g095650 | .....                                                         |       |  |       | 453  |
| SIMLO5_LEAF         | .....                                                         |       |  |       | 352  |
| SIMLO5_FLOWER       | .....                                                         |       |  |       | 352  |
| SIMLO5_FRUIT        | .....                                                         |       |  |       | 352  |
|                     |                                                               | 2,220 |  | 2,240 |      |
| gDNA_Solyc03g095650 | <b>CCACTATAAC ATCAAAACCA CTCCACTTTA CTAGAATGTC AAAACATACC</b> |       |  |       | 2250 |
| cDNA_Solyc03g095650 | .....                                                         |       |  |       | 453  |
| SIMLO5_LEAF         | .....                                                         |       |  |       | 352  |
| SIMLO5_FLOWER       | .....                                                         |       |  |       | 352  |
| SIMLO5_FRUIT        | .....                                                         |       |  |       | 352  |
|                     |                                                               | 2,260 |  | 2,280 |      |
| gDNA_Solyc03g095650 | <b>ATTAAGATTG ACTTTATTAT TGTTATAATT GGTGAAGTTT TATAATTTCA</b> |       |  |       | 2300 |
| cDNA_Solyc03g095650 | .....                                                         |       |  |       | 453  |
| SIMLO5_LEAF         | .....                                                         |       |  |       | 352  |
| SIMLO5_FLOWER       | .....                                                         |       |  |       | 352  |
| SIMLO5_FRUIT        | .....                                                         |       |  |       | 352  |
|                     |                                                               | 2,320 |  | 2,340 |      |
| gDNA_Solyc03g095650 | <b>CTTTTATAAT GGATAGTTCA ATTGCTAACA AATATTGATT TTCTTTTTTA</b> |       |  |       | 2350 |
| cDNA_Solyc03g095650 | .....                                                         |       |  |       | 453  |
| SIMLO5_LEAF         | .....                                                         |       |  |       | 352  |
| SIMLO5_FLOWER       | .....                                                         |       |  |       | 352  |
| SIMLO5_FRUIT        | .....                                                         |       |  |       | 352  |
|                     |                                                               | 2,360 |  | 2,400 |      |
| gDNA_Solyc03g095650 | <b>CTATTCTAAG GACAAAGTGT AGTTATTTTA ATAGCAAAAT AATTTAATAG</b> |       |  |       | 2400 |
| cDNA_Solyc03g095650 | .....                                                         |       |  |       | 453  |
| SIMLO5_LEAF         | .....                                                         |       |  |       | 352  |
| SIMLO5_FLOWER       | .....                                                         |       |  |       | 352  |
| SIMLO5_FRUIT        | .....                                                         |       |  |       | 352  |
|                     |                                                               | 2,420 |  | 2,440 |      |
| gDNA_Solyc03g095650 | <b>TTTATAAAGA TCAACTTTA TGAGTAAAAT TAACCAAGAG AAATGTCTTA</b>  |       |  |       | 2450 |
| cDNA_Solyc03g095650 | .....                                                         |       |  |       | 453  |
| SIMLO5_LEAF         | .....                                                         |       |  |       | 352  |
| SIMLO5_FLOWER       | .....                                                         |       |  |       | 352  |
| SIMLO5_FRUIT        | .....                                                         |       |  |       | 352  |
|                     |                                                               | 2,460 |  | 2,500 |      |
| gDNA_Solyc03g095650 | <b>TGTATATTGA TTTAAAAAA TTACTTTTG AATATCTTT TTTTCTACTT</b>    |       |  |       | 2500 |
| cDNA_Solyc03g095650 | .....                                                         |       |  |       | 453  |
| SIMLO5_LEAF         | .....                                                         |       |  |       | 352  |
| SIMLO5_FLOWER       | .....                                                         |       |  |       | 352  |
| SIMLO5_FRUIT        | .....                                                         |       |  |       | 352  |
|                     |                                                               | 2,520 |  | 2,540 |      |
| gDNA_Solyc03g095650 | <b>TGAATACCAA GATAGAGTCT GTTGATCTAA ATAAATCATC CTTCCGGCCT</b> |       |  |       | 2550 |
| cDNA_Solyc03g095650 | .....                                                         |       |  |       | 453  |
| SIMLO5_LEAF         | .....                                                         |       |  |       | 352  |
| SIMLO5_FLOWER       | .....                                                         |       |  |       | 352  |
| SIMLO5_FRUIT        | .....                                                         |       |  |       | 352  |
|                     |                                                               | 2,560 |  | 2,600 |      |
| gDNA_Solyc03g095650 | <b>CTCTCGCTC CACACCCGA AACTGACTCG AGTTCTTAGA CATTGTGTTAA</b>  |       |  |       | 2600 |
| cDNA_Solyc03g095650 | .....                                                         |       |  |       | 453  |
| SIMLO5_LEAF         | .....                                                         |       |  |       | 352  |
| SIMLO5_FLOWER       | .....                                                         |       |  |       | 352  |
| SIMLO5_FRUIT        | .....                                                         |       |  |       | 352  |
|                     |                                                               | 2,620 |  | 2,640 |      |
| gDNA_Solyc03g095650 | <b>TTACTAACGA AAATTTAGAT TAATCAGGTC AAAATTAATG AGTGTGAGTT</b> |       |  |       | 2650 |
| cDNA_Solyc03g095650 | .....                                                         |       |  |       | 453  |
| SIMLO5_LEAF         | .....                                                         |       |  |       | 352  |
| SIMLO5_FLOWER       | .....                                                         |       |  |       | 352  |
| SIMLO5_FRUIT        | .....                                                         |       |  |       | 352  |
|                     |                                                               | 2,660 |  | 2,700 |      |
| gDNA_Solyc03g095650 | <b>AAGAAA TGGT AAACAAAAA AAAATGATTC CTTCTTTTAT TAAAGTCGAA</b> |       |  |       | 2700 |
| cDNA_Solyc03g095650 | .....                                                         |       |  |       | 453  |
| SIMLO5_LEAF         | .....                                                         |       |  |       | 352  |
| SIMLO5_FLOWER       | .....                                                         |       |  |       | 352  |
| SIMLO5_FRUIT        | .....                                                         |       |  |       | 352  |
|                     |                                                               | 2,720 |  | 2,740 |      |
| gDNA_Solyc03g095650 | <b>TACATATATT TGGTATTGAT CTAATATGAC CATAGAATAA ATATGTTGCT</b> |       |  |       | 2750 |
| cDNA_Solyc03g095650 | .....                                                         |       |  |       | 453  |
| SIMLO5_LEAF         | .....                                                         |       |  |       | 352  |
| SIMLO5_FLOWER       | .....                                                         |       |  |       | 352  |
| SIMLO5_FRUIT        | .....                                                         |       |  |       | 352  |
|                     |                                                               | 2,760 |  | 2,800 |      |
| gDNA_Solyc03g095650 | <b>GACTTGCCTT ATATATTCTG ATTGAAATGC AGGGGAAACT CCAATTTGCT</b> |       |  |       | 2800 |
| cDNA_Solyc03g095650 | .....                                                         |       |  |       | 470  |
| SIMLO5_LEAF         | .....                                                         |       |  |       | 369  |
| SIMLO5_FLOWER       | .....                                                         |       |  |       | 369  |
| SIMLO5_FRUIT        | .....                                                         |       |  |       | 369  |

|                     |                                                                                                   |       |       |       |      |
|---------------------|---------------------------------------------------------------------------------------------------|-------|-------|-------|------|
|                     |                                                                                                   | 2,820 |       | 2,840 |      |
| gDNA_Solyc03g095650 | <b>TCAAAA</b> <b>TATG</b> <b>CAATTCACCA</b> <b>ACTCCACATT</b> <b>TTTATCTTTG</b> <b>TGTTAGCCGT</b> |       |       |       | 2850 |
| cDNA_Solyc03g095650 | <b>TCAAAA</b> <b>TATG</b> <b>CAATTCACCA</b> <b>ACTCCACATT</b> <b>TTTATCTTTG</b> <b>TGTTAGCCGT</b> |       |       |       | 520  |
| SIMLO5_LEAF         | <b>TCAAAA</b> <b>TATG</b> <b>CAATTCACCA</b> <b>ACTCCACATT</b> <b>TTTATCTTTG</b> <b>TGTTASCCGT</b> |       |       |       | 419  |
| SIMLO5_FLOWER       | <b>TCAAAA</b> <b>TATG</b> <b>CAATTCACCA</b> <b>ACTCCACATT</b> <b>TTTATCTTTG</b> <b>TGTTAGCCGT</b> |       |       |       | 419  |
| SIMLO5_FRUIT        | <b>TCAAAA</b> <b>TATG</b> <b>CAATTCACCA</b> <b>ACTCCACATT</b> <b>TTTATCTTTG</b> <b>TGTTAGCCGT</b> |       |       |       | 419  |
|                     |                                                                                                   | 2,860 | 2,880 | 2,900 |      |
| gDNA_Solyc03g095650 | <b>TGCACATG</b> <b>TG</b> <b>TTGTATTGTA</b> <b>TTACCAC</b> <b>TTTGGGAATTGGC</b> <b>AAACTAAGG</b>  |       |       |       | 2900 |
| cDNA_Solyc03g095650 | <b>TGCACATG</b> <b>TG</b> <b>TTGTATTGTA</b> <b>TTACCAC</b> <b>TTTGGGAATTGGC</b> <b>AAACTAAGG</b>  |       |       |       | 569  |
| SIMLO5_LEAF         | <b>TGCACATG</b> <b>TG</b> <b>TTGTATTGTA</b> <b>TTACCAC</b> <b>TTTGGGAATTGGC</b> <b>AAACTAAGG</b>  |       |       |       | 468  |
| SIMLO5_FLOWER       | <b>TGCACATG</b> <b>TG</b> <b>TTGTATTGTA</b> <b>TTACCAC</b> <b>TTTGGGAATTGGC</b> <b>AAACTAAGG</b>  |       |       |       | 468  |
| SIMLO5_FRUIT        | <b>TGCACATG</b> <b>TG</b> <b>TTGTATTGTA</b> <b>TTACCAC</b> <b>TTTGGGAATTGGC</b> <b>AAACTAAGG</b>  |       |       |       | 468  |
|                     |                                                                                                   | 2,920 | 2,940 |       |      |
| gDNA_Solyc03g095650 | <b>TAAC</b> <b>TTCTTA</b> <b>AGATATATTT</b> <b>AATACTCCGT</b> <b>TTCTTTTATA</b> <b>TAATAATAAT</b> |       |       |       | 2950 |
| cDNA_Solyc03g095650 | -----                                                                                             |       |       |       | 569  |
| SIMLO5_LEAF         | -----                                                                                             |       |       |       | 468  |
| SIMLO5_FLOWER       | -----                                                                                             |       |       |       | 468  |
| SIMLO5_FRUIT        | -----                                                                                             |       |       |       | 468  |
|                     |                                                                                                   | 2,960 | 2,980 | 3,000 |      |
| gDNA_Solyc03g095650 | <b>TATCCCAAGT</b> <b>ACTCACTCTT</b> <b>TTTTCTAAAA</b> <b>AAAAAATGAA</b> <b>TAAAATTTAT</b>         |       |       |       | 3000 |
| cDNA_Solyc03g095650 | -----                                                                                             |       |       |       | 569  |
| SIMLO5_LEAF         | -----                                                                                             |       |       |       | 468  |
| SIMLO5_FLOWER       | -----                                                                                             |       |       |       | 468  |
| SIMLO5_FRUIT        | -----                                                                                             |       |       |       | 468  |
|                     |                                                                                                   | 3,020 | 3,040 |       |      |
| gDNA_Solyc03g095650 | <b>GATTCTAAAA</b> <b>TACAGTTATG</b> <b>TCCTTAAATA</b> <b>TATCGCGTGA</b> <b>AAAAC</b> <b>TGCAA</b> |       |       |       | 3050 |
| cDNA_Solyc03g095650 | -----                                                                                             |       |       |       | 569  |
| SIMLO5_LEAF         | -----                                                                                             |       |       |       | 468  |
| SIMLO5_FLOWER       | -----                                                                                             |       |       |       | 468  |
| SIMLO5_FRUIT        | -----                                                                                             |       |       |       | 468  |
|                     |                                                                                                   | 3,060 | 3,080 | 3,100 |      |
| gDNA_Solyc03g095650 | <b>TTAAAGT</b> <b>GTT</b> <b>AAAAAAAT</b> <b>AAAAATGGTC</b> <b>ATTCTATTTT</b> <b>AAATAATTTT</b>   |       |       |       | 3100 |
| cDNA_Solyc03g095650 | -----                                                                                             |       |       |       | 569  |
| SIMLO5_LEAF         | -----                                                                                             |       |       |       | 468  |
| SIMLO5_FLOWER       | -----                                                                                             |       |       |       | 468  |
| SIMLO5_FRUIT        | -----                                                                                             |       |       |       | 468  |
|                     |                                                                                                   | 3,120 | 3,140 |       |      |
| gDNA_Solyc03g095650 | <b>TTTTTAAAAA</b> <b>AAAAACGATC</b> <b>ATTCTTTTTG</b> <b>TAACAAAATA</b> <b>GACGGTAATT</b>         |       |       |       | 3150 |
| cDNA_Solyc03g095650 | -----                                                                                             |       |       |       | 569  |
| SIMLO5_LEAF         | -----                                                                                             |       |       |       | 468  |
| SIMLO5_FLOWER       | -----                                                                                             |       |       |       | 468  |
| SIMLO5_FRUIT        | -----                                                                                             |       |       |       | 468  |
|                     |                                                                                                   | 3,160 | 3,180 | 3,200 |      |
| gDNA_Solyc03g095650 | <b>AATGATTGT</b> <b>GTACATTGAA</b> <b>ATGCAGATGA</b> <b>GGACATGGAG</b> <b>AGCTTGGGAG</b>          |       |       |       | 3200 |
| cDNA_Solyc03g095650 | -----                                                                                             |       |       |       | 593  |
| SIMLO5_LEAF         | -----                                                                                             |       |       |       | 492  |
| SIMLO5_FLOWER       | -----                                                                                             |       |       |       | 492  |
| SIMLO5_FRUIT        | -----                                                                                             |       |       |       | 492  |
|                     |                                                                                                   | 3,220 | 3,240 |       |      |
| gDNA_Solyc03g095650 | <b>GATGAATCTA</b> <b>AAACAATTGA</b> <b>ATACCAATTC</b> <b>TATAACGGTT</b> <b>AGTTTTATTG</b>         |       |       |       | 3250 |
| cDNA_Solyc03g095650 | <b>GATGAATCTA</b> <b>AAACAATTGA</b> <b>ATACCAATTC</b> <b>TATAACG</b> -----                        |       |       |       | 630  |
| SIMLO5_LEAF         | <b>GATGAATCTA</b> <b>AAACAATTGA</b> <b>ATACCAATTC</b> <b>TATAACG</b> -----                        |       |       |       | 529  |
| SIMLO5_FLOWER       | <b>GATGAATCTA</b> <b>AAACAATTGA</b> <b>ATACCAATTC</b> <b>TATAACG</b> -----                        |       |       |       | 529  |
| SIMLO5_FRUIT        | <b>GATGAATCTA</b> <b>AAACAATTGA</b> <b>ATACCAATTC</b> <b>TATAACG</b> -----                        |       |       |       | 529  |
|                     |                                                                                                   | 3,260 | 3,280 | 3,300 |      |
| gDNA_Solyc03g095650 | <b>ATCAGGATTC</b> <b>AGAGCAATGT</b> <b>TCTTGTTAAT</b> <b>ATTTAATTAA</b> <b>AATTACTTCT</b>         |       |       |       | 3300 |
| cDNA_Solyc03g095650 | -----                                                                                             |       |       |       | 630  |
| SIMLO5_LEAF         | -----                                                                                             |       |       |       | 529  |
| SIMLO5_FLOWER       | -----                                                                                             |       |       |       | 529  |
| SIMLO5_FRUIT        | -----                                                                                             |       |       |       | 529  |
|                     |                                                                                                   | 3,320 | 3,340 |       |      |
| gDNA_Solyc03g095650 | <b>TAAAATAATT</b> <b>TATTCTAATT</b> <b>AACTTTTTTT</b> <b>GTGTTCAATT</b> <b>ATTTTATAGT</b>         |       |       |       | 3350 |
| cDNA_Solyc03g095650 | -----                                                                                             |       |       |       | 630  |
| SIMLO5_LEAF         | -----                                                                                             |       |       |       | 529  |
| SIMLO5_FLOWER       | -----                                                                                             |       |       |       | 529  |
| SIMLO5_FRUIT        | -----                                                                                             |       |       |       | 529  |
|                     |                                                                                                   | 3,360 | 3,380 | 3,400 |      |
| gDNA_Solyc03g095650 | <b>TCCACATTAC</b> <b>ATATGCTTAA</b> <b>AACATATTTT</b> <b>CACTTTTTCA</b> <b>CTTCATTTT</b>          |       |       |       | 3400 |
| cDNA_Solyc03g095650 | -----                                                                                             |       |       |       | 630  |
| SIMLO5_LEAF         | -----                                                                                             |       |       |       | 529  |
| SIMLO5_FLOWER       | -----                                                                                             |       |       |       | 529  |
| SIMLO5_FRUIT        | -----                                                                                             |       |       |       | 529  |
|                     |                                                                                                   | 3,420 | 3,440 |       |      |
| gDNA_Solyc03g095650 | <b>TGATTGGTGA</b> <b>GTTCATAATA</b> <b>TATACAAAAT</b> <b>AAAAGAGAAA</b> <b>AAAATATCAT</b>         |       |       |       | 3450 |
| cDNA_Solyc03g095650 | -----                                                                                             |       |       |       | 630  |
| SIMLO5_LEAF         | -----                                                                                             |       |       |       | 529  |
| SIMLO5_FLOWER       | -----                                                                                             |       |       |       | 529  |
| SIMLO5_FRUIT        | -----                                                                                             |       |       |       | 529  |
|                     |                                                                                                   | 3,460 | 3,480 | 3,500 |      |
| gDNA_Solyc03g095650 | <b>AATTTTTTTT</b> <b>GTTGTTGTTG</b> <b>CAGATCCTGA</b> <b>GAGATTTAGA</b> <b>TTTGCAAGAG</b>         |       |       |       | 3500 |
| cDNA_Solyc03g095650 | -----                                                                                             |       |       |       | 657  |
| SIMLO5_LEAF         | -----                                                                                             |       |       |       | 556  |
| SIMLO5_FLOWER       | -----                                                                                             |       |       |       | 556  |
| SIMLO5_FRUIT        | -----                                                                                             |       |       |       | 556  |

|                     |                                                            |       |       |       |       |       |
|---------------------|------------------------------------------------------------|-------|-------|-------|-------|-------|
|                     |                                                            |       | 3,520 |       | 3,540 |       |
| gDNA_Solyc03g095650 | AAACA TCAT T TGGACG TAA CA TTTGCATT TCTGGAGCAA CTCTCCAAT T |       |       |       |       | 3550  |
| cDNA_Solyc03g095650 | AAACA TCAT T TGGACG TAA CA TTTGCATT TCTGGAGCAA CTCTCCAAT T |       |       |       |       | 707   |
| SIMLO5_LEAF         | AAACA TCAT T TGGACG TAA CA TTTGCATT TCTGGAGCAA CTCTCCAAT T |       |       |       |       | 606   |
| SIMLO5_FLOWER       | AAACA TCAT T TGGACG TAA CA TTTGCATT TCTGGAGCAA CTCTCCAAT T |       |       |       |       | 606   |
| SIMLO5_FRUIT        | AAACA TCAT T TGGACG TAA CA TTTGCATT TCTGGAGCAA CTCTCCAAT T |       |       |       |       | 606   |
|                     |                                                            | 3,560 |       | 3,580 |       | 3,600 |
| gDNA_Solyc03g095650 | CTTCTCTGGA TAGTATGATT TAATATTTTT TTTCTTTTTT ATTTCTCTTA     |       |       |       |       | 3600  |
| cDNA_Solyc03g095650 | CTTCTCTGGA TAGT-----                                       |       |       |       |       | 721   |
| SIMLO5_LEAF         | CTTCTCTGGA TAGT-----                                       |       |       |       |       | 620   |
| SIMLO5_FLOWER       | CTTCTCTGGA TAGT-----                                       |       |       |       |       | 620   |
| SIMLO5_FRUIT        | CTTCTCTGGA TAGT-----                                       |       |       |       |       | 620   |
|                     |                                                            | 3,620 |       | 3,640 |       |       |
| gDNA_Solyc03g095650 | ATTTAAAAGC TATAAAATTT AAATTTTTTT GTTAATTAAT AATGTTTGT      |       |       |       |       | 3650  |
| cDNA_Solyc03g095650 | -----                                                      |       |       |       |       | 721   |
| SIMLO5_LEAF         | -----                                                      |       |       |       |       | 620   |
| SIMLO5_FLOWER       | -----                                                      |       |       |       |       | 620   |
| SIMLO5_FRUIT        | -----                                                      |       |       |       |       | 620   |
|                     |                                                            | 3,660 |       | 3,680 |       | 3,700 |
| gDNA_Solyc03g095650 | TTTTTAAAAA TATGGTTGAT TTGTTCCAGG TTTGTTTCTT CAGACAGTTC     |       |       |       |       | 3700  |
| cDNA_Solyc03g095650 | -----                                                      |       |       |       |       | 740   |
| SIMLO5_LEAF         | -----                                                      |       |       |       |       | 639   |
| SIMLO5_FLOWER       | -----                                                      |       |       |       |       | 639   |
| SIMLO5_FRUIT        | -----                                                      |       |       |       |       | 639   |
|                     |                                                            | 3,720 |       | 3,740 |       |       |
| gDNA_Solyc03g095650 | TATGCATCAG TTGAAAAAGT AGACTATCTT ACCCTTAGAC ATGGCTTTGC     |       |       |       |       | 3750  |
| cDNA_Solyc03g095650 | TATGCATCAG TTGAAAAAGT AGACTATCTT ACCCTTAGAC ATGGCTTTGC     |       |       |       |       | 790   |
| SIMLO5_LEAF         | TATGCATCAG TTGAAAAAGT AGACTATCTT ACCCTTAGAC ATGGCTTTGC     |       |       |       |       | 689   |
| SIMLO5_FLOWER       | TATGCATCAG TTGAAAAAGT AGACTATCTT ACCCTTAGAC ATGGCTTTGC     |       |       |       |       | 689   |
| SIMLO5_FRUIT        | TATGCATCAG TTGAAAAAGT AGACTATCTT ACCCTTAGAC ATGGCTTTGC     |       |       |       |       | 689   |
|                     |                                                            | 3,760 |       | 3,780 |       | 3,800 |
| gDNA_Solyc03g095650 | TATGGTAATT AATTTTGATA CAACTTATTA AAATTATTAG ATAGTGGGAA     |       |       |       |       | 3800  |
| cDNA_Solyc03g095650 | TATGG-----                                                 |       |       |       |       | 795   |
| SIMLO5_LEAF         | TATGG-----                                                 |       |       |       |       | 694   |
| SIMLO5_FLOWER       | TATGG-----                                                 |       |       |       |       | 694   |
| SIMLO5_FRUIT        | TATGG-----                                                 |       |       |       |       | 694   |
|                     |                                                            | 3,820 |       | 3,840 |       |       |
| gDNA_Solyc03g095650 | ATATTAATTT TAATATTGAT GATATTATTT TGGATGATGA CAGGCACATT     |       |       |       |       | 3850  |
| cDNA_Solyc03g095650 | -----                                                      |       |       |       |       | 801   |
| SIMLO5_LEAF         | -----                                                      |       |       |       |       | 700   |
| SIMLO5_FLOWER       | -----                                                      |       |       |       |       | 700   |
| SIMLO5_FRUIT        | -----                                                      |       |       |       |       | 700   |
|                     |                                                            | 3,860 |       | 3,880 |       | 3,900 |
| gDNA_Solyc03g095650 | TAGCACCTCA GCAAGAAAAG AATTTTGATT TTCAATTGTA TATAAATAGA     |       |       |       |       | 3900  |
| cDNA_Solyc03g095650 | TAGCACCTCA GCAAGAAAAG AATTTTGATT TTCAATTGTA TATAAATAGA     |       |       |       |       | 851   |
| SIMLO5_LEAF         | TAGCACCTCA GCAAGAAAAG AATTTTGATT TTCAATTGTA TATAAATAGA     |       |       |       |       | 750   |
| SIMLO5_FLOWER       | TAGCACCTCA GCAAGAAAAG AATTTTGATT TTCAATTGTA TATAAATAGA     |       |       |       |       | 750   |
| SIMLO5_FRUIT        | TAGCACCTCA GCAAGAAAAG AATTTTGATT TTCAATTGTA TATAAATAGA     |       |       |       |       | 750   |
|                     |                                                            | 3,920 |       | 3,940 |       |       |
| gDNA_Solyc03g095650 | GCAC TTGAAG AAGATTTTAA AGATGTTGTG GGAATAAGG T AGCTAAACA    |       |       |       |       | 3950  |
| cDNA_Solyc03g095650 | GCAC TT GAAG AAGA TTTT AA AGA T GTTGTG GGAA T AAG -----    |       |       |       |       | 889   |
| SIMLO5_LEAF         | GCAC TT GAAG AAGA TTTT AA AGA T GTTGTG GGAA T AAG -----    |       |       |       |       | 788   |
| SIMLO5_FLOWER       | GCAC TT GAAG AAGA TTTT AA AGA T GTTGTG GGAA T AAG -----    |       |       |       |       | 788   |
| SIMLO5_FRUIT        | GCAC TTGAAG AAGA TTTTAA AGATGTTGTG GGAATAAG-----           |       |       |       |       | 788   |
|                     |                                                            | 3,960 |       | 3,980 |       | 4,000 |
| gDNA_Solyc03g095650 | AATCATAATT ATTACTTTTT TTTCTCTTCA AATAGTAAAA AAAATGTAGT     |       |       |       |       | 4000  |
| cDNA_Solyc03g095650 | -----                                                      |       |       |       |       | 890   |
| SIMLO5_LEAF         | -----                                                      |       |       |       |       | 789   |
| SIMLO5_FLOWER       | -----                                                      |       |       |       |       | 789   |
| SIMLO5_FRUIT        | -----                                                      |       |       |       |       | 803   |
|                     |                                                            | 4,020 |       | 4,040 |       |       |
| gDNA_Solyc03g095650 | ATATATTATT CATGAGAATT TCACCCCTCT GTATGTGGCA GTCCACTGTT     |       |       |       |       | 4050  |
| cDNA_Solyc03g095650 | -----                                                      |       |       |       |       | 898   |
| SIMLO5_LEAF         | -----                                                      |       |       |       |       | 797   |
| SIMLO5_FLOWER       | -----                                                      |       |       |       |       | 797   |
| SIMLO5_FRUIT        | ATATATTATT CATGAGAATT TCACCCCTCT GTATGTGGCA GTCCACTGTT     |       |       |       |       | 853   |
|                     |                                                            | 4,060 |       | 4,080 |       | 4,100 |
| gDNA_Solyc03g095650 | ATGGATGTTT GCAGTCCCTCT ACTTCTCAC TACTACCAAT GGTAAAGCTAC    |       |       |       |       | 4100  |
| cDNA_Solyc03g095650 | ATGGATGTTT GCAGTCCCTCT ACTTCTCAC TACTACCAA T G-----        |       |       |       |       | 939   |
| SIMLO5_LEAF         | ATGGATGTTT GCAGCCCTCT ACTTCTCAC TACTACCAA T G-----         |       |       |       |       | 838   |
| SIMLO5_FLOWER       | ATGGATGTTT GCAGY CCTCT ACTTCTCAC TACTACCAA T G-----        |       |       |       |       | 838   |
| SIMLO5_FRUIT        | ATGGATGTTT GCAGY CCTCT ACTTCTCAC TACTACCAA T G-----        |       |       |       |       | 894   |
|                     |                                                            | 4,120 |       | 4,140 |       |       |
| gDNA_Solyc03g095650 | ATTGAGATAA AAAAAAGTTT GGATTTAATT ATATGAATGA AATAAAAATG     |       |       |       |       | 4150  |
| cDNA_Solyc03g095650 | -----                                                      |       |       |       |       | 939   |
| SIMLO5_LEAF         | -----                                                      |       |       |       |       | 838   |
| SIMLO5_FLOWER       | -----                                                      |       |       |       |       | 838   |
| SIMLO5_FRUIT        | -----                                                      |       |       |       |       | 894   |
|                     |                                                            | 4,160 |       | 4,180 |       | 4,200 |
| gDNA_Solyc03g095650 | ATTAATTTTG ATTTGAATCG TTTGATAACT GAGAAGAGTT TTAATGATAT     |       |       |       |       | 4200  |
| cDNA_Solyc03g095650 | -----                                                      |       |       |       |       | 939   |
| SIMLO5_LEAF         | -----                                                      |       |       |       |       | 838   |
| SIMLO5_FLOWER       | -----                                                      |       |       |       |       | 838   |
| SIMLO5_FRUIT        | -----                                                      |       |       |       |       | 894   |

|                     |                                                                |       |  |       |       |
|---------------------|----------------------------------------------------------------|-------|--|-------|-------|
|                     |                                                                | 4,220 |  | 4,240 |       |
| gDNA_Solyc03g095650 | <b>TAGTAATGTA TAAATTAGCT ATGAGGGAAT CTATATCAGT ATTAGTTATT</b>  |       |  |       | 4250  |
| cDNA_Solyc03g095650 | .....                                                          |       |  |       | 939   |
| SIMLO5_LEAF         | .....                                                          |       |  |       | 838   |
| SIMLO5_FLOWER       | .....                                                          |       |  |       | 838   |
| SIMLO5_FRUIT        | .....                                                          |       |  |       | 894   |
|                     |                                                                | 4,260 |  | 4,280 | 4,300 |
| gDNA_Solyc03g095650 | <b>CCACCCTTCA TTCTATCTAT CTATTTTATA ATTGATTAAT AACTTATGGG</b>  |       |  |       | 4300  |
| cDNA_Solyc03g095650 | .....                                                          |       |  |       | 939   |
| SIMLO5_LEAF         | .....                                                          |       |  |       | 838   |
| SIMLO5_FLOWER       | .....                                                          |       |  |       | 838   |
| SIMLO5_FRUIT        | .....                                                          |       |  |       | 894   |
|                     |                                                                | 4,320 |  | 4,340 |       |
| gDNA_Solyc03g095650 | <b>GGTCGTTTAG TAATTGCATA AAATAAACTT TATTCATATA TTCGAGTTTG</b>  |       |  |       | 4350  |
| cDNA_Solyc03g095650 | .....                                                          |       |  |       | 939   |
| SIMLO5_LEAF         | .....                                                          |       |  |       | 838   |
| SIMLO5_FLOWER       | .....                                                          |       |  |       | 838   |
| SIMLO5_FRUIT        | .....                                                          |       |  |       | 894   |
|                     |                                                                | 4,360 |  | 4,380 | 4,400 |
| gDNA_Solyc03g095650 | <b>TATAACTTAT ACGATATTTG GTAGGTAGAT AACAAAAAAG TTATTCATGT</b>  |       |  |       | 4400  |
| cDNA_Solyc03g095650 | .....                                                          |       |  |       | 939   |
| SIMLO5_LEAF         | .....                                                          |       |  |       | 838   |
| SIMLO5_FLOWER       | .....                                                          |       |  |       | 838   |
| SIMLO5_FRUIT        | .....                                                          |       |  |       | 894   |
|                     |                                                                | 4,420 |  | 4,440 |       |
| gDNA_Solyc03g095650 | <b>ATATAGTCGA TACGATGTTT GGTAGATAGA TAAGAAAAAA ATTATTCATG</b>  |       |  |       | 4450  |
| cDNA_Solyc03g095650 | .....                                                          |       |  |       | 939   |
| SIMLO5_LEAF         | .....                                                          |       |  |       | 838   |
| SIMLO5_FLOWER       | .....                                                          |       |  |       | 838   |
| SIMLO5_FRUIT        | .....                                                          |       |  |       | 894   |
|                     |                                                                | 4,460 |  | 4,480 | 4,500 |
| gDNA_Solyc03g095650 | <b>CATAAAATTA ATACGACATT TGATAGATAG ATAAAAAATA ATTCATATAT</b>  |       |  |       | 4500  |
| cDNA_Solyc03g095650 | .....                                                          |       |  |       | 939   |
| SIMLO5_LEAF         | .....                                                          |       |  |       | 838   |
| SIMLO5_FLOWER       | .....                                                          |       |  |       | 838   |
| SIMLO5_FRUIT        | .....                                                          |       |  |       | 894   |
|                     |                                                                | 4,520 |  | 4,540 |       |
| gDNA_Solyc03g095650 | <b>AAAATTAATA CAACGCTTGA TTAACAATTT TTAATAATTA CATACTAAT</b>   |       |  |       | 4550  |
| cDNA_Solyc03g095650 | .....                                                          |       |  |       | 939   |
| SIMLO5_LEAF         | .....                                                          |       |  |       | 838   |
| SIMLO5_FLOWER       | .....                                                          |       |  |       | 838   |
| SIMLO5_FRUIT        | .....                                                          |       |  |       | 894   |
|                     |                                                                | 4,560 |  | 4,580 | 4,600 |
| gDNA_Solyc03g095650 | <b>ATATATATAA GTTACCAGAA AATTTATGTA ATATTTATGC GCAGTAAAAA</b>  |       |  |       | 4600  |
| cDNA_Solyc03g095650 | .....                                                          |       |  |       | 939   |
| SIMLO5_LEAF         | .....                                                          |       |  |       | 838   |
| SIMLO5_FLOWER       | .....                                                          |       |  |       | 838   |
| SIMLO5_FRUIT        | .....                                                          |       |  |       | 894   |
|                     |                                                                | 4,620 |  | 4,640 |       |
| gDNA_Solyc03g095650 | <b>GTGAAATAAT TAATAAGTAC GGCTAACACA TGAATAAAAA GTTAAAAATGA</b> |       |  |       | 4650  |
| cDNA_Solyc03g095650 | .....                                                          |       |  |       | 939   |
| SIMLO5_LEAF         | .....                                                          |       |  |       | 838   |
| SIMLO5_FLOWER       | .....                                                          |       |  |       | 838   |
| SIMLO5_FRUIT        | .....                                                          |       |  |       | 894   |
|                     |                                                                | 4,660 |  | 4,680 | 4,700 |
| gDNA_Solyc03g095650 | <b>CAGATCTTAT CATTCCCACT TGATTACTTT CTTCTTCTAC ATAATTAAG</b>   |       |  |       | 4700  |
| cDNA_Solyc03g095650 | .....                                                          |       |  |       | 939   |
| SIMLO5_LEAF         | .....                                                          |       |  |       | 838   |
| SIMLO5_FLOWER       | .....                                                          |       |  |       | 838   |
| SIMLO5_FRUIT        | .....                                                          |       |  |       | 894   |
|                     |                                                                | 4,720 |  | 4,740 |       |
| gDNA_Solyc03g095650 | <b>AAATGTTTTA ATTTTGATAC AAAGTTAAAG AATGAAAGAA TATAATTGTA</b>  |       |  |       | 4750  |
| cDNA_Solyc03g095650 | .....                                                          |       |  |       | 939   |
| SIMLO5_LEAF         | .....                                                          |       |  |       | 838   |
| SIMLO5_FLOWER       | .....                                                          |       |  |       | 838   |
| SIMLO5_FRUIT        | .....                                                          |       |  |       | 894   |
|                     |                                                                | 4,760 |  | 4,780 | 4,800 |
| gDNA_Solyc03g095650 | <b>AAATAAAATG TTTTAATTTA AAAAAATATA ATTTTACTAA TTTTAAATAT</b>  |       |  |       | 4800  |
| cDNA_Solyc03g095650 | .....                                                          |       |  |       | 939   |
| SIMLO5_LEAF         | .....                                                          |       |  |       | 838   |
| SIMLO5_FLOWER       | .....                                                          |       |  |       | 838   |
| SIMLO5_FRUIT        | .....                                                          |       |  |       | 894   |
|                     |                                                                | 4,820 |  | 4,840 |       |
| gDNA_Solyc03g095650 | <b>ATAAAAACGA CATTCAAACA AATAATTTAT GCATAACTAA ACTCCACATA</b>  |       |  |       | 4850  |
| cDNA_Solyc03g095650 | .....                                                          |       |  |       | 939   |
| SIMLO5_LEAF         | .....                                                          |       |  |       | 838   |
| SIMLO5_FLOWER       | .....                                                          |       |  |       | 838   |
| SIMLO5_FRUIT        | .....                                                          |       |  |       | 894   |
|                     |                                                                | 4,860 |  | 4,880 | 4,900 |
| gDNA_Solyc03g095650 | <b>ATAAACCTAC ATAGCTGATA TTTATATAAC TAATACCTGC ATAACCTAATA</b> |       |  |       | 4900  |
| cDNA_Solyc03g095650 | .....                                                          |       |  |       | 939   |
| SIMLO5_LEAF         | .....                                                          |       |  |       | 838   |
| SIMLO5_FLOWER       | .....                                                          |       |  |       | 838   |
| SIMLO5_FRUIT        | .....                                                          |       |  |       | 894   |

|                     |                                                                   |       |  |       |       |
|---------------------|-------------------------------------------------------------------|-------|--|-------|-------|
|                     |                                                                   | 4,920 |  | 4,940 |       |
| gDNA_Solyc03g095650 | <b>TCTGCACAAC TAGTACAAAC ATAAC TAATA CTTCCATTAT TTATTTGCAT</b>    |       |  |       | 4950  |
| cDNA_Solyc03g095650 | .....                                                             |       |  |       | 939   |
| SIMLO5_LEAF         | .....                                                             |       |  |       | 838   |
| SIMLO5_FLOWER       | .....                                                             |       |  |       | 838   |
| SIMLO5_FRUIT        | .....                                                             |       |  |       | 894   |
|                     |                                                                   | 4,960 |  | 4,980 | 5,000 |
| gDNA_Solyc03g095650 | <b>AACTAGTATT CACATTACTA ATATATGTAT AACTTTATCC AGTCACCAAA</b>     |       |  |       | 5000  |
| cDNA_Solyc03g095650 | .....                                                             |       |  |       | 939   |
| SIMLO5_LEAF         | .....                                                             |       |  |       | 838   |
| SIMLO5_FLOWER       | .....                                                             |       |  |       | 838   |
| SIMLO5_FRUIT        | .....                                                             |       |  |       | 894   |
|                     |                                                                   | 5,020 |  | 5,040 |       |
| gDNA_Solyc03g095650 | <b>CGATACCCTA AACATTTTAA ACAACCATTA AATATGATAT TACTTATACA</b>     |       |  |       | 5050  |
| cDNA_Solyc03g095650 | .....                                                             |       |  |       | 939   |
| SIMLO5_LEAF         | .....                                                             |       |  |       | 838   |
| SIMLO5_FLOWER       | .....                                                             |       |  |       | 838   |
| SIMLO5_FRUIT        | .....                                                             |       |  |       | 894   |
|                     |                                                                   | 5,060 |  | 5,080 | 5,100 |
| gDNA_Solyc03g095650 | <b>TAATTTAATA TCTCCATAAC TAAATGACCC AAAATATTTT GGATCATATA</b>     |       |  |       | 5100  |
| cDNA_Solyc03g095650 | .....                                                             |       |  |       | 939   |
| SIMLO5_LEAF         | .....                                                             |       |  |       | 838   |
| SIMLO5_FLOWER       | .....                                                             |       |  |       | 838   |
| SIMLO5_FRUIT        | .....                                                             |       |  |       | 894   |
|                     |                                                                   | 5,120 |  | 5,140 |       |
| gDNA_Solyc03g095650 | <b>TTTTAATTGT TACTAAATAG ATTTGTGCTT CAGGTTGGTA TTCATACTAT</b>     |       |  |       | 5150  |
| cDNA_Solyc03g095650 | .....                                                             |       |  |       | 956   |
| SIMLO5_LEAF         | .....                                                             |       |  |       | 855   |
| SIMLO5_FLOWER       | .....                                                             |       |  |       | 855   |
| SIMLO5_FRUIT        | .....                                                             |       |  |       | 924   |
|                     |                                                                   | 5,160 |  | 5,180 | 5,200 |
| gDNA_Solyc03g095650 | <b>TGGCTGCCGT TCATTCCTTT AATTGTAAGT CAATCCAGAG TACCACATAT</b>     |       |  |       | 5200  |
| cDNA_Solyc03g095650 | .....                                                             |       |  |       | 980   |
| SIMLO5_LEAF         | .....                                                             |       |  |       | 879   |
| SIMLO5_FLOWER       | .....                                                             |       |  |       | 879   |
| SIMLO5_FRUIT        | .....                                                             |       |  |       | 948   |
|                     |                                                                   | 5,220 |  | 5,240 |       |
| gDNA_Solyc03g095650 | <b>TTTCTATTCT TATATTA AAA TTTCTAATTC TACTATTAAT TAATGTGTTT</b>    |       |  |       | 5250  |
| cDNA_Solyc03g095650 | .....                                                             |       |  |       | 980   |
| SIMLO5_LEAF         | .....                                                             |       |  |       | 879   |
| SIMLO5_FLOWER       | .....                                                             |       |  |       | 879   |
| SIMLO5_FRUIT        | .....                                                             |       |  |       | 948   |
|                     |                                                                   | 5,260 |  | 5,280 | 5,300 |
| gDNA_Solyc03g095650 | <b>CATTATGTAA TTAAGTAAT TTTTTGCAG ATAATATTAC TGGTGGGCAC</b>       |       |  |       | 5300  |
| cDNA_Solyc03g095650 | .....                                                             |       |  |       | 1000  |
| SIMLO5_LEAF         | .....                                                             |       |  |       | 899   |
| SIMLO5_FLOWER       | .....                                                             |       |  |       | 899   |
| SIMLO5_FRUIT        | .....                                                             |       |  |       | 968   |
|                     |                                                                   | 5,320 |  | 5,340 |       |
| gDNA_Solyc03g095650 | <b>AAAA TTACAA GTGATTATAA CAAAA TGGG ATT AAGGA TT AAAGAAAGAG</b>  |       |  |       | 5350  |
| cDNA_Solyc03g095650 | .....                                                             |       |  |       | 1050  |
| SIMLO5_LEAF         | .....                                                             |       |  |       | 949   |
| SIMLO5_FLOWER       | .....                                                             |       |  |       | 949   |
| SIMLO5_FRUIT        | .....                                                             |       |  |       | 1018  |
|                     |                                                                   | 5,360 |  | 5,380 | 5,400 |
| gDNA_Solyc03g095650 | <b>GAGACA TTGT TAAAGGAACA CCATTAGTTG AAC CAGGGGA TGA TCTTTT C</b> |       |  |       | 5400  |
| cDNA_Solyc03g095650 | .....                                                             |       |  |       | 1100  |
| SIMLO5_LEAF         | .....                                                             |       |  |       | 999   |
| SIMLO5_FLOWER       | .....                                                             |       |  |       | 999   |
| SIMLO5_FRUIT        | .....                                                             |       |  |       | 1068  |
|                     |                                                                   | 5,420 |  | 5,440 |       |
| gDNA_Solyc03g095650 | <b>TGGTTTAA TC GTCCTGATCT TTTGCACTTC TTCATTCACT TTGTTCTCTT</b>    |       |  |       | 5450  |
| cDNA_Solyc03g095650 | .....                                                             |       |  |       | 1150  |
| SIMLO5_LEAF         | .....                                                             |       |  |       | 1049  |
| SIMLO5_FLOWER       | .....                                                             |       |  |       | 1049  |
| SIMLO5_FRUIT        | .....                                                             |       |  |       | 1118  |
|                     |                                                                   | 5,460 |  | 5,480 | 5,500 |
| gDNA_Solyc03g095650 | <b>TCAGGTAATA ATTAAGTCAT AATACATAAA TGTGCCTTTT AACTTGGTTT</b>     |       |  |       | 5500  |
| cDNA_Solyc03g095650 | .....                                                             |       |  |       | 1154  |
| SIMLO5_LEAF         | .....                                                             |       |  |       | 1053  |
| SIMLO5_FLOWER       | .....                                                             |       |  |       | 1053  |
| SIMLO5_FRUIT        | .....                                                             |       |  |       | 1122  |
|                     |                                                                   | 5,520 |  | 5,540 |       |
| gDNA_Solyc03g095650 | <b>CAAATTACAT TTATGCCATT TAATTTTGGG TATGCACAAA TGGATATTTA</b>     |       |  |       | 5550  |
| cDNA_Solyc03g095650 | .....                                                             |       |  |       | 1154  |
| SIMLO5_LEAF         | .....                                                             |       |  |       | 1053  |
| SIMLO5_FLOWER       | .....                                                             |       |  |       | 1053  |
| SIMLO5_FRUIT        | .....                                                             |       |  |       | 1122  |
|                     |                                                                   | 5,560 |  | 5,580 | 5,600 |
| gDNA_Solyc03g095650 | <b>AACTTGTATA AAGTTGAACA AATAGATACA CATATCCTAC GTGTCATCTT</b>     |       |  |       | 5600  |
| cDNA_Solyc03g095650 | .....                                                             |       |  |       | 1154  |
| SIMLO5_LEAF         | .....                                                             |       |  |       | 1053  |
| SIMLO5_FLOWER       | .....                                                             |       |  |       | 1053  |
| SIMLO5_FRUIT        | .....                                                             |       |  |       | 1122  |



|                     |                    |                    |                   |                     |                         |      |
|---------------------|--------------------|--------------------|-------------------|---------------------|-------------------------|------|
|                     |                    | 5,620              |                   | 5,640               |                         |      |
| gDNA_Solyc03g095650 | <b>ACATGTCATT</b>  | <b>TTTTGTCCTA</b>  | <b>CGTAATGTCC</b> | <b>TACATGTATT</b>   | <b>GTTACATGTA</b>       | 5650 |
| cDNA_Solyc03g095650 | .....              | .....              | .....             | .....               | .....                   | 1154 |
| SIMLO5_LEAF         | .....              | .....              | .....             | .....               | .....                   | 1053 |
| SIMLO5_FLOWER       | .....              | .....              | .....             | .....               | .....                   | 1053 |
| SIMLO5_FRUIT        | .....              | .....              | .....             | .....               | .....                   | 1122 |
|                     | 5,660              |                    | 5,680             |                     | 5,700                   |      |
| gDNA_Solyc03g095650 | <b>GAACTCATGA</b>  | <b>GTTTATTTAT</b>  | <b>CTAAAAGTTG</b> | <b>GATAGTTAAA</b>   | <b>GTGCTCTGTT</b>       | 5700 |
| cDNA_Solyc03g095650 | .....              | .....              | .....             | .....               | .....                   | 1154 |
| SIMLO5_LEAF         | .....              | .....              | .....             | .....               | .....                   | 1053 |
| SIMLO5_FLOWER       | .....              | .....              | .....             | .....               | .....                   | 1053 |
| SIMLO5_FRUIT        | .....              | .....              | .....             | .....               | .....                   | 1122 |
|                     |                    | 5,720              |                   | 5,740               |                         |      |
| gDNA_Solyc03g095650 | <b>GTGCATTATG</b>  | <b>AAAATTGAAG</b>  | <b>GTCAACGTTA</b> | <b>AAATTTGAAA</b>   | <b>TCAAGTTTAT</b>       | 5750 |
| cDNA_Solyc03g095650 | .....              | .....              | .....             | .....               | .....                   | 1154 |
| SIMLO5_LEAF         | .....              | .....              | .....             | .....               | .....                   | 1053 |
| SIMLO5_FLOWER       | .....              | .....              | .....             | .....               | .....                   | 1053 |
| SIMLO5_FRUIT        | .....              | .....              | .....             | .....               | .....                   | 1122 |
|                     | 5,760              |                    | 5,780             |                     | 5,800                   |      |
| gDNA_Solyc03g095650 | <b>GATCCAATAT</b>  | <b>ATATCTTATG</b>  | <b>TCAATAATTA</b> | <b>ATTACACTTA</b>   | <b>CTAATTAATG</b>       | 5800 |
| cDNA_Solyc03g095650 | .....              | .....              | .....             | .....               | .....                   | 1154 |
| SIMLO5_LEAF         | .....              | .....              | .....             | .....               | .....                   | 1053 |
| SIMLO5_FLOWER       | .....              | .....              | .....             | .....               | .....                   | 1053 |
| SIMLO5_FRUIT        | .....              | .....              | .....             | .....               | .....                   | 1122 |
|                     |                    | 5,820              |                   | 5,840               |                         |      |
| gDNA_Solyc03g095650 | <b>GATCCGAAAT</b>  | <b>CAACGTTTGT</b>  | <b>TTATGATATC</b> | <b>AATCTGTATA</b>   | <b>AATTTCAACT</b>       | 5850 |
| cDNA_Solyc03g095650 | .....              | .....              | .....             | .....               | .....                   | 1154 |
| SIMLO5_LEAF         | .....              | .....              | .....             | .....               | .....                   | 1053 |
| SIMLO5_FLOWER       | .....              | .....              | .....             | .....               | .....                   | 1053 |
| SIMLO5_FRUIT        | .....              | .....              | .....             | .....               | .....                   | 1122 |
|                     | 5,860              |                    | 5,880             |                     | 5,900                   |      |
| gDNA_Solyc03g095650 | <b>TCAAATCCCG</b>  | <b>AATCGAGAAT</b>  | <b>TTGATGATAA</b> | <b>TATGTTTGTC</b>   | <b>TAATAATTAC</b>       | 5900 |
| cDNA_Solyc03g095650 | .....              | .....              | .....             | .....               | .....                   | 1154 |
| SIMLO5_LEAF         | .....              | .....              | .....             | .....               | .....                   | 1053 |
| SIMLO5_FLOWER       | .....              | .....              | .....             | .....               | .....                   | 1053 |
| SIMLO5_FRUIT        | .....              | .....              | .....             | .....               | .....                   | 1122 |
|                     |                    | 5,920              |                   | 5,940               |                         |      |
| gDNA_Solyc03g095650 | <b>TACTACTACT</b>  | <b>ACTTTGTTTG</b>  | <b>GTTTTCCAGA</b> | <b>ATGCATATCA</b>   | <b>ACTTGCTTTC</b>       | 5950 |
| cDNA_Solyc03g095650 | .....              | .....              | .....             | <b>A</b> ATGCATATCA | <b>ACTTGCTTTC</b>       | 1175 |
| SIMLO5_LEAF         | .....              | .....              | .....             | <b>A</b> ATGCATATCA | <b>ACTTGCTTTC</b>       | 1074 |
| SIMLO5_FLOWER       | .....              | .....              | .....             | <b>A</b> ATGCATATCA | <b>ACTTGCTTTC</b>       | 1074 |
| SIMLO5_FRUIT        | .....              | .....              | .....             | <b>A</b> ATGCATATCA | <b>ACTTGCTTTC</b>       | 1143 |
|                     | 5,960              |                    | 5,980             |                     | 6,000                   |      |
| gDNA_Solyc03g095650 | <b>TTTGCTTGGG</b>  | <b>GCTGGGTAAG</b>  | <b>TAGCTTAATT</b> | <b>ATTGAATTTT</b>   | <b>AACTAGTATT</b>       | 6000 |
| cDNA_Solyc03g095650 | .....              | <b>GCTGG</b> ..... | .....             | .....               | .....                   | 1190 |
| SIMLO5_LEAF         | .....              | <b>GCTGG</b> ..... | .....             | .....               | .....                   | 1089 |
| SIMLO5_FLOWER       | .....              | <b>GCTGG</b> ..... | .....             | .....               | .....                   | 1089 |
| SIMLO5_FRUIT        | .....              | <b>GCTGG</b> ..... | .....             | .....               | .....                   | 1158 |
|                     |                    | 6,020              |                   | 6,040               |                         |      |
| gDNA_Solyc03g095650 | <b>ATATATATGT</b>  | <b>ATCATCATT</b>   | <b>TTTTTTTTTG</b> | <b>TGCAGTGGAA</b>   | <b>ATTTAATTTA</b>       | 6050 |
| cDNA_Solyc03g095650 | .....              | .....              | .....             | .....               | <b>TGGAA</b> ATTTAATTTA | 1205 |
| SIMLO5_LEAF         | .....              | .....              | .....             | .....               | <b>TGGAA</b> ATTTAATTTA | 1104 |
| SIMLO5_FLOWER       | .....              | .....              | .....             | .....               | <b>TGGAA</b> ATTTAATTTA | 1104 |
| SIMLO5_FRUIT        | .....              | .....              | .....             | .....               | <b>TGGAA</b> ATTTAATTTA | 1173 |
|                     | 6,060              |                    | 6,080             |                     | 6,100                   |      |
| gDNA_Solyc03g095650 | <b>CCA TCTTGCT</b> | <b>TCCACAAAAA</b>  | <b>TGTAACAGAC</b> | <b>ATAGCCATAA</b>   | <b>CAC TTTCCAT</b>      | 6100 |
| cDNA_Solyc03g095650 | <b>CCA TCTTGCT</b> | <b>TCCACAAAAA</b>  | <b>TGTAACAGAC</b> | <b>ATAGCCATAA</b>   | <b>CAC TTTCCAT</b>      | 1255 |
| SIMLO5_LEAF         | <b>CCA TCTTGCT</b> | <b>TCCACAAAAA</b>  | <b>TGTAACAGAC</b> | <b>ATAGCCATAA</b>   | <b>CAC TTTCCAT</b>      | 1154 |
| SIMLO5_FLOWER       | <b>CCA TCTTGCT</b> | <b>TCCACAAAAA</b>  | <b>TGTAACAGAC</b> | <b>ATAGCCATAA</b>   | <b>CAC TTTCCAT</b>      | 1154 |
| SIMLO5_FRUIT        | <b>CCA TCTTGCT</b> | <b>TCCACAAAAA</b>  | <b>TGTAACAGAC</b> | <b>ATAGCCATAA</b>   | <b>CAC TTTCCAT</b>      | 1223 |
|                     |                    | 6,120              |                   | 6,140               |                         |      |
| gDNA_Solyc03g095650 | <b>GGGGTGAGCA</b>  | <b>TTTTTACTAC</b>  | <b>TCCCTCCGGT</b> | <b>CTCATTTTAT</b>   | <b>ATATGAATTA</b>       | 6150 |
| cDNA_Solyc03g095650 | <b>GGGG</b> .....  | .....              | .....             | .....               | .....                   | 1259 |
| SIMLO5_LEAF         | <b>GGGG</b> .....  | .....              | .....             | .....               | .....                   | 1158 |
| SIMLO5_FLOWER       | <b>GGGG</b> .....  | .....              | .....             | .....               | .....                   | 1158 |
| SIMLO5_FRUIT        | <b>GGGG</b> .....  | .....              | .....             | .....               | .....                   | 1227 |
|                     | 6,160              |                    | 6,180             |                     | 6,200                   |      |
| gDNA_Solyc03g095650 | <b>GTTTAATTTA</b>  | <b>ATGCATGAAA</b>  | <b>GTTTAAAAGG</b> | <b>GAAAGAGCCA</b>   | <b>CTTTTGAGAT</b>       | 6200 |
| cDNA_Solyc03g095650 | .....              | .....              | .....             | .....               | .....                   | 1259 |
| SIMLO5_LEAF         | .....              | .....              | .....             | .....               | .....                   | 1158 |
| SIMLO5_FLOWER       | .....              | .....              | .....             | .....               | .....                   | 1158 |
| SIMLO5_FRUIT        | .....              | .....              | .....             | .....               | .....                   | 1227 |
|                     |                    | 6,220              |                   | 6,240               |                         |      |
| gDNA_Solyc03g095650 | <b>TGTGGTCTAA</b>  | <b>ATAAGGTATA</b>  | <b>GATGATTGTA</b> | <b>TGTGTATAAA</b>   | <b>TCATTTTATT</b>       | 6250 |
| cDNA_Solyc03g095650 | .....              | .....              | .....             | .....               | .....                   | 1259 |
| SIMLO5_LEAF         | .....              | .....              | .....             | .....               | .....                   | 1158 |
| SIMLO5_FLOWER       | .....              | .....              | .....             | .....               | .....                   | 1158 |
| SIMLO5_FRUIT        | .....              | .....              | .....             | .....               | .....                   | 1227 |
|                     | 6,260              |                    | 6,280             |                     | 6,300                   |      |
| gDNA_Solyc03g095650 | <b>AAAAATAAAA</b>  | <b>TAAGCATTTT</b>  | <b>AAAGTTAAAT</b> | <b>TGTTACTTAA</b>   | <b>TATAGAAAAA</b>       | 6300 |
| cDNA_Solyc03g095650 | .....              | .....              | .....             | .....               | .....                   | 1259 |
| SIMLO5_LEAF         | .....              | .....              | .....             | .....               | .....                   | 1158 |
| SIMLO5_FLOWER       | .....              | .....              | .....             | .....               | .....                   | 1158 |
| SIMLO5_FRUIT        | .....              | .....              | .....             | .....               | .....                   | 1227 |

|                     |                   |                   |                   |                    |                   |      |
|---------------------|-------------------|-------------------|-------------------|--------------------|-------------------|------|
|                     |                   | 6,320             |                   | 6,340              |                   |      |
| gDNA_Solyc03g095650 | <b>TATCTCATT</b>  | <b>TTTTTAGAT</b>  | <b>TTATGCGGAA</b> | <b>AAACTCATT</b>   | <b>TCTTTCTTT</b>  | 6350 |
| cDNA_Solyc03g095650 | .....             | .....             | .....             | .....              | .....             | 1259 |
| SIMLO5_LEAF         | .....             | .....             | .....             | .....              | .....             | 1158 |
| SIMLO5_FLOWER       | .....             | .....             | .....             | .....              | .....             | 1158 |
| SIMLO5_FRUIT        | .....             | .....             | .....             | .....              | .....             | 1227 |
|                     | 6,360             |                   | 6,380             |                    | 6,400             |      |
| gDNA_Solyc03g095650 | <b>ATAACTCAA</b>  | <b>TTTTATACT</b>  | <b>TATTACTTTT</b> | <b>ACCTAATTAA</b>  | <b>ACAAAGATTA</b> | 6400 |
| cDNA_Solyc03g095650 | .....             | .....             | .....             | .....              | .....             | 1259 |
| SIMLO5_LEAF         | .....             | .....             | .....             | .....              | .....             | 1158 |
| SIMLO5_FLOWER       | .....             | .....             | .....             | .....              | .....             | 1158 |
| SIMLO5_FRUIT        | .....             | .....             | .....             | .....              | .....             | 1227 |
|                     | 6,420             |                   | 6,440             |                    |                   |      |
| gDNA_Solyc03g095650 | <b>AAACGATAGT</b> | <b>CGTCAATATG</b> | <b>AGCTAGATCT</b> | <b>GTTAGGCTGG</b>  | <b>TGTGGCTTAA</b> | 6450 |
| cDNA_Solyc03g095650 | .....             | .....             | .....             | .....              | .....             | 1259 |
| SIMLO5_LEAF         | .....             | .....             | .....             | .....              | .....             | 1158 |
| SIMLO5_FLOWER       | .....             | .....             | .....             | .....              | .....             | 1158 |
| SIMLO5_FRUIT        | .....             | .....             | .....             | .....              | .....             | 1227 |
|                     | 6,460             |                   | 6,480             |                    | 6,500             |      |
| gDNA_Solyc03g095650 | <b>CCCGTGATT</b>  | <b>GGTAGGGATG</b> | <b>AATTATGATT</b> | <b>TTTAAAGTCC</b>  | <b>ATTTAAGAAA</b> | 6500 |
| cDNA_Solyc03g095650 | .....             | .....             | .....             | .....              | .....             | 1259 |
| SIMLO5_LEAF         | .....             | .....             | .....             | .....              | .....             | 1158 |
| SIMLO5_FLOWER       | .....             | .....             | .....             | .....              | .....             | 1158 |
| SIMLO5_FRUIT        | .....             | .....             | .....             | .....              | .....             | 1227 |
|                     | 6,520             |                   | 6,540             |                    |                   |      |
| gDNA_Solyc03g095650 | <b>AAGGTTTTTC</b> | <b>AGCCTAGCCT</b> | <b>GAATAAGCTT</b> | <b>GTCGATTTGT</b>  | <b>GGAGCTTGAG</b> | 6550 |
| cDNA_Solyc03g095650 | .....             | .....             | .....             | .....              | .....             | 1259 |
| SIMLO5_LEAF         | .....             | .....             | .....             | .....              | .....             | 1158 |
| SIMLO5_FLOWER       | .....             | .....             | .....             | .....              | .....             | 1158 |
| SIMLO5_FRUIT        | .....             | .....             | .....             | .....              | .....             | 1227 |
|                     | 6,560             |                   | 6,580             |                    | 6,600             |      |
| gDNA_Solyc03g095650 | <b>AAATATAGAT</b> | <b>GAGACCGACT</b> | <b>CGTGAGTCTA</b> | <b>AAACAATTAA</b>  | <b>TTAAAATAAA</b> | 6600 |
| cDNA_Solyc03g095650 | .....             | .....             | .....             | .....              | .....             | 1259 |
| SIMLO5_LEAF         | .....             | .....             | .....             | .....              | .....             | 1158 |
| SIMLO5_FLOWER       | .....             | .....             | .....             | .....              | .....             | 1158 |
| SIMLO5_FRUIT        | .....             | .....             | .....             | .....              | .....             | 1227 |
|                     | 6,620             |                   | 6,640             |                    |                   |      |
| gDNA_Solyc03g095650 | <b>AATAAAATAG</b> | <b>AGTATTAATA</b> | <b>ATAACAGACA</b> | <b>CAAAATTG</b>    | <b>TTTTAAGTTT</b> | 6650 |
| cDNA_Solyc03g095650 | .....             | .....             | .....             | .....              | .....             | 1259 |
| SIMLO5_LEAF         | .....             | .....             | .....             | .....              | .....             | 1158 |
| SIMLO5_FLOWER       | .....             | .....             | .....             | .....              | .....             | 1158 |
| SIMLO5_FRUIT        | .....             | .....             | .....             | .....              | .....             | 1227 |
|                     | 6,660             |                   | 6,680             |                    | 6,700             |      |
| gDNA_Solyc03g095650 | <b>AGAATATTAC</b> | <b>AATTTAATA</b>  | <b>CAAACATGTT</b> | <b>TTATAAATA</b>   | <b>TGTAATATAT</b> | 6700 |
| cDNA_Solyc03g095650 | .....             | .....             | .....             | .....              | .....             | 1259 |
| SIMLO5_LEAF         | .....             | .....             | .....             | .....              | .....             | 1158 |
| SIMLO5_FLOWER       | .....             | .....             | .....             | .....              | .....             | 1158 |
| SIMLO5_FRUIT        | .....             | .....             | .....             | .....              | .....             | 1227 |
|                     | 6,720             |                   | 6,740             |                    |                   |      |
| gDNA_Solyc03g095650 | <b>ATAATAAAGT</b> | <b>TCCTAAAATT</b> | <b>TCTAGGGAGT</b> | <b>CACTGCATAG</b>  | <b>GTCTATTTTT</b> | 6750 |
| cDNA_Solyc03g095650 | .....             | .....             | .....             | .....              | .....             | 1259 |
| SIMLO5_LEAF         | .....             | .....             | .....             | .....              | .....             | 1158 |
| SIMLO5_FLOWER       | .....             | .....             | .....             | .....              | .....             | 1158 |
| SIMLO5_FRUIT        | .....             | .....             | .....             | .....              | .....             | 1227 |
|                     | 6,760             |                   | 6,780             |                    | 6,800             |      |
| gDNA_Solyc03g095650 | <b>TTGTGTTTTA</b> | <b>TTATGATCAT</b> | <b>TGAAAACAA</b>  | <b>TTAGATTAAT</b>  | <b>ATTTCTATTT</b> | 6800 |
| cDNA_Solyc03g095650 | .....             | .....             | .....             | .....              | .....             | 1259 |
| SIMLO5_LEAF         | .....             | .....             | .....             | .....              | .....             | 1158 |
| SIMLO5_FLOWER       | .....             | .....             | .....             | .....              | .....             | 1158 |
| SIMLO5_FRUIT        | .....             | .....             | .....             | .....              | .....             | 1227 |
|                     | 6,820             |                   | 6,840             |                    |                   |      |
| gDNA_Solyc03g095650 | <b>AGCTATTTAT</b> | <b>TTTTTACTT</b>  | <b>GAAATCAAAC</b> | <b>TTAATAAATA</b>  | <b>TTATATAGAT</b> | 6850 |
| cDNA_Solyc03g095650 | .....             | .....             | .....             | .....              | .....             | 1259 |
| SIMLO5_LEAF         | .....             | .....             | .....             | .....              | .....             | 1158 |
| SIMLO5_FLOWER       | .....             | .....             | .....             | .....              | .....             | 1158 |
| SIMLO5_FRUIT        | .....             | .....             | .....             | .....              | .....             | 1227 |
|                     | 6,860             |                   | 6,880             |                    | 6,900             |      |
| gDNA_Solyc03g095650 | <b>AATTTTACTT</b> | <b>GTGTAGTTGA</b> | <b>TTAACAAGAT</b> | <b>AATAACACTA</b>  | <b>GTCAATATTT</b> | 6900 |
| cDNA_Solyc03g095650 | .....             | .....             | .....             | .....              | .....             | 1259 |
| SIMLO5_LEAF         | .....             | .....             | .....             | .....              | .....             | 1158 |
| SIMLO5_FLOWER       | .....             | .....             | .....             | .....              | .....             | 1158 |
| SIMLO5_FRUIT        | .....             | .....             | .....             | .....              | .....             | 1227 |
|                     | 6,920             |                   | 6,940             |                    |                   |      |
| gDNA_Solyc03g095650 | <b>ATGAAACTCT</b> | <b>CTCCGTTTAA</b> | <b>AAAAGAATGA</b> | <b>CCTCTTTTCC</b>  | <b>TTTTTAGTCT</b> | 6950 |
| cDNA_Solyc03g095650 | .....             | .....             | .....             | .....              | .....             | 1259 |
| SIMLO5_LEAF         | .....             | .....             | .....             | .....              | .....             | 1158 |
| SIMLO5_FLOWER       | .....             | .....             | .....             | .....              | .....             | 1158 |
| SIMLO5_FRUIT        | .....             | .....             | .....             | .....              | .....             | 1227 |
|                     | 6,960             |                   | 6,980             |                    | 7,000             |      |
| gDNA_Solyc03g095650 | <b>GTTCGGAAAA</b> | <b>AGATGACCTC</b> | <b>TTTCTTTTTT</b> | <b>CGGTAAACAAC</b> | <b>TTTTCACGTG</b> | 7000 |
| cDNA_Solyc03g095650 | .....             | .....             | .....             | .....              | .....             | 1259 |
| SIMLO5_LEAF         | .....             | .....             | .....             | .....              | .....             | 1158 |
| SIMLO5_FLOWER       | .....             | .....             | .....             | .....              | .....             | 1158 |
| SIMLO5_FRUIT        | .....             | .....             | .....             | .....              | .....             | 1227 |

|                     |                    |                    |                     |                    |                    |      |
|---------------------|--------------------|--------------------|---------------------|--------------------|--------------------|------|
|                     |                    | 7,020              |                     | 7,040              |                    |      |
| gDNA_Solyc03g095650 | <b>GCATGTTTAA</b>  | <b>GACTACTAGA</b>  | <b>ATAAAAGACA</b>   | <b>ATTTTGTACA</b>  | <b>TTTGACATAA</b>  | 7050 |
| cDNA_Solyc03g095650 | .....              | .....              | .....               | .....              | .....              | 1259 |
| SIMLO5_LEAF         | .....              | .....              | .....               | .....              | .....              | 1158 |
| SIMLO5_FLOWER       | .....              | .....              | .....               | .....              | .....              | 1158 |
| SIMLO5_FRUIT        | .....              | .....              | .....               | .....              | .....              | 1227 |
|                     | 7,060              |                    | 7,080               |                    | 7,100              |      |
| gDNA_Solyc03g095650 | <b>ATTCAATTTA</b>  | <b>GGATCACATG</b>  | <b>ATTAAGGTC</b>    | <b>TTTTTTATT</b>   | <b>ACTTGAACCT</b>  | 7100 |
| cDNA_Solyc03g095650 | .....              | .....              | .....               | .....              | .....              | 1259 |
| SIMLO5_LEAF         | .....              | .....              | .....               | .....              | .....              | 1158 |
| SIMLO5_FLOWER       | .....              | .....              | .....               | .....              | .....              | 1158 |
| SIMLO5_FRUIT        | .....              | .....              | .....               | .....              | .....              | 1227 |
|                     | 7,120              |                    | 7,140               |                    |                    |      |
| gDNA_Solyc03g095650 | <b>CGTGTCAGT</b>   | <b>CGAACTAGAC</b>  | <b>CATTCTTTGA</b>   | <b>GAAATAGAGA</b>  | <b>GAGTAATATT</b>  | 7150 |
| cDNA_Solyc03g095650 | .....              | .....              | .....               | .....              | .....              | 1259 |
| SIMLO5_LEAF         | .....              | .....              | .....               | .....              | .....              | 1158 |
| SIMLO5_FLOWER       | .....              | .....              | .....               | .....              | .....              | 1158 |
| SIMLO5_FRUIT        | .....              | .....              | .....               | .....              | .....              | 1227 |
|                     | 7,160              |                    | 7,180               |                    | 7,200              |      |
| gDNA_Solyc03g095650 | <b>TTTAAATTAT</b>  | <b>AATTTAATAA</b>  | <b>AAAATTTATA</b>   | <b>AAAATATACT</b>  | <b>TTTAAGAAAA</b>  | 7200 |
| cDNA_Solyc03g095650 | .....              | .....              | .....               | .....              | .....              | 1259 |
| SIMLO5_LEAF         | .....              | .....              | .....               | .....              | .....              | 1158 |
| SIMLO5_FLOWER       | .....              | .....              | .....               | .....              | .....              | 1158 |
| SIMLO5_FRUIT        | .....              | .....              | .....               | .....              | .....              | 1227 |
|                     | 7,220              |                    | 7,240               |                    |                    |      |
| gDNA_Solyc03g095650 | <b>GAGGGCTGAA</b>  | <b>AGTCCATAGC</b>  | <b>CCATACACTT</b>   | <b>GTGGGCTGAG</b>  | <b>CCGATTATTT</b>  | 7250 |
| cDNA_Solyc03g095650 | .....              | .....              | .....               | .....              | .....              | 1259 |
| SIMLO5_LEAF         | .....              | .....              | .....               | .....              | .....              | 1158 |
| SIMLO5_FLOWER       | .....              | .....              | .....               | .....              | .....              | 1158 |
| SIMLO5_FRUIT        | .....              | .....              | .....               | .....              | .....              | 1227 |
|                     | 7,260              |                    | 7,280               |                    | 7,300              |      |
| gDNA_Solyc03g095650 | <b>TCTAACCAC</b>   | <b>ATAAAAAATGG</b> | <b>GCTAACCAG</b>    | <b>CCTAATCCAT</b>  | <b>CAAATTGCAA</b>  | 7300 |
| cDNA_Solyc03g095650 | .....              | .....              | .....               | .....              | .....              | 1259 |
| SIMLO5_LEAF         | .....              | .....              | .....               | .....              | .....              | 1158 |
| SIMLO5_FLOWER       | .....              | .....              | .....               | .....              | .....              | 1158 |
| SIMLO5_FRUIT        | .....              | .....              | .....               | .....              | .....              | 1227 |
|                     | 7,320              |                    | 7,340               |                    |                    |      |
| gDNA_Solyc03g095650 | <b>AGCCCGAAG</b>   | <b>AAAATGAATC</b>  | <b>AACCCATATT</b>   | <b>GACAGCTCTA</b>  | <b>GCTAAAACCC</b>  | 7350 |
| cDNA_Solyc03g095650 | .....              | .....              | .....               | .....              | .....              | 1259 |
| SIMLO5_LEAF         | .....              | .....              | .....               | .....              | .....              | 1158 |
| SIMLO5_FLOWER       | .....              | .....              | .....               | .....              | .....              | 1158 |
| SIMLO5_FRUIT        | .....              | .....              | .....               | .....              | .....              | 1227 |
|                     | 7,360              |                    | 7,380               |                    | 7,400              |      |
| gDNA_Solyc03g095650 | <b>TCTTTGTCTT</b>  | <b>ATATTTCTCT</b>  | <b>TATTTTGTG</b>    | <b>GCCATTATAT</b>  | <b>AAAAAAGCAT</b>  | 7400 |
| cDNA_Solyc03g095650 | .....              | .....              | .....               | .....              | .....              | 1259 |
| SIMLO5_LEAF         | .....              | .....              | .....               | .....              | .....              | 1158 |
| SIMLO5_FLOWER       | .....              | .....              | .....               | .....              | .....              | 1158 |
| SIMLO5_FRUIT        | .....              | .....              | .....               | .....              | .....              | 1227 |
|                     | 7,420              |                    | 7,440               |                    |                    |      |
| gDNA_Solyc03g095650 | <b>ATTTAACTTA</b>  | <b>TTGTTGGATT</b>  | <b>TTGATGTTGC</b>   | <b>TATAATTAGG</b>  | <b>GCTCTCATTC</b>  | 7450 |
| cDNA_Solyc03g095650 | .....              | .....              | .....               | .....              | <b>GCTCTCATTC</b>  | 1269 |
| SIMLO5_LEAF         | .....              | .....              | .....               | .....              | <b>GCTCTCATTC</b>  | 1168 |
| SIMLO5_FLOWER       | .....              | .....              | .....               | .....              | <b>GCTCTCATTC</b>  | 1168 |
| SIMLO5_FRUIT        | .....              | .....              | .....               | .....              | <b>GCTCTCATTC</b>  | 1237 |
|                     | 7,460              |                    | 7,480               |                    | 7,500              |      |
| gDNA_Solyc03g095650 | <b>AAGTTCTTTG</b>  | <b>CAGCTACGTG</b>  | <b>ACACTCCCC</b>    | <b>TATATGCCTT</b>  | <b>AGTTACTCAG</b>  | 7500 |
| cDNA_Solyc03g095650 | <b>AAGTTCTTTG</b>  | <b>CAGCTACGTG</b>  | <b>ACACTCCCC</b>    | <b>TATATGCCTT</b>  | <b>AGTTACTCAG</b>  | 1319 |
| SIMLO5_LEAF         | <b>AAGTTCTTTG</b>  | <b>CAGCTACGTG</b>  | <b>ACACTCCCC</b>    | <b>TATATGCCTT</b>  | <b>AGTTACTCAG</b>  | 1218 |
| SIMLO5_FLOWER       | <b>AAGTTCTTTG</b>  | <b>CAGCTACGTG</b>  | <b>ACACTCCCC</b>    | <b>TATATGCCTT</b>  | <b>AGTTACTCAG</b>  | 1218 |
| SIMLO5_FRUIT        | <b>AAGTTCTTTG</b>  | <b>CAGCTACGTG</b>  | <b>ACACTCCCC</b>    | <b>TATATGCCTT</b>  | <b>AGTTACTCAG</b>  | 1287 |
|                     | 7,520              |                    | 7,540               |                    |                    |      |
| gDNA_Solyc03g095650 | <b>GTATATATTC</b>  | <b>TCTTCATCTG</b>  | <b>TCCTCGATCC</b>   | <b>ATGAATATAC</b>  | <b>AATTAGAAAT</b>  | 7550 |
| cDNA_Solyc03g095650 | .....              | .....              | .....               | .....              | .....              | 1319 |
| SIMLO5_LEAF         | .....              | .....              | .....               | .....              | .....              | 1218 |
| SIMLO5_FLOWER       | .....              | .....              | .....               | .....              | .....              | 1218 |
| SIMLO5_FRUIT        | .....              | .....              | .....               | .....              | .....              | 1287 |
|                     | 7,560              |                    | 7,580               |                    | 7,600              |      |
| gDNA_Solyc03g095650 | <b>ATTTAAGTTA</b>  | <b>TACATACTTA</b>  | <b>CAAAAAAAG</b>    | <b>TGAATATATT</b>  | <b>TAACCTGTTG</b>  | 7600 |
| cDNA_Solyc03g095650 | .....              | .....              | .....               | .....              | .....              | 1319 |
| SIMLO5_LEAF         | .....              | .....              | .....               | .....              | .....              | 1218 |
| SIMLO5_FLOWER       | .....              | .....              | .....               | .....              | .....              | 1218 |
| SIMLO5_FRUIT        | .....              | .....              | .....               | .....              | .....              | 1287 |
|                     | 7,620              |                    | 7,640               |                    |                    |      |
| gDNA_Solyc03g095650 | <b>TAAAATTTTG</b>  | <b>CAGATGGGAT</b>  | <b>CAACAATGAA</b>   | <b>ACCAGTTATC</b>  | <b>TTTGGTGACA</b>  | 7650 |
| cDNA_Solyc03g095650 | .....              | <b>ATGGGAT</b>     | <b>CAACAA TGAA</b>  | <b>ACCAG TTATC</b> | <b>TTTGG TGACA</b> | 1356 |
| SIMLO5_LEAF         | .....              | <b>ATGGGAT</b>     | <b>CAACAA TGAA</b>  | <b>ACCAG TTATC</b> | <b>TTTGG TGACA</b> | 1255 |
| SIMLO5_FLOWER       | .....              | <b>ATGGGAT</b>     | <b>CAACAA TGAA</b>  | <b>ACCAG TTATC</b> | <b>TTTGG TGACA</b> | 1255 |
| SIMLO5_FRUIT        | .....              | <b>ATGGGAT</b>     | <b>CAACAA TGAA</b>  | <b>ACCAG TTATC</b> | <b>TTTGG TGACA</b> | 1324 |
|                     | 7,660              |                    | 7,680               |                    | 7,700              |      |
| gDNA_Solyc03g095650 | <b>ACGTGGCA TA</b> | <b>CGCGA TACGG</b> | <b>ACA TGGCA TC</b> | <b>AGACAGCAAA</b>  | <b>GCAACGGGCA</b>  | 7700 |
| cDNA_Solyc03g095650 | <b>ACGTGGCA TA</b> | <b>CGCGA TACGG</b> | <b>ACA TGGCA TC</b> | <b>AGACAGCAAA</b>  | <b>GCAACGGGCA</b>  | 1406 |
| SIMLO5_LEAF         | <b>ACGTGGCA TA</b> | <b>CGCGA TACGG</b> | <b>ACA TGGCA TC</b> | <b>AGACAGCAAA</b>  | <b>GCAACGGGCA</b>  | 1305 |
| SIMLO5_FLOWER       | <b>ACGTGGCA TA</b> | <b>CGCGA TACGG</b> | <b>ACA TGGCA TC</b> | <b>AGACAGCAAA</b>  | <b>GCAACGGGCA</b>  | 1305 |
| SIMLO5_FRUIT        | <b>ACGTGGCATA</b>  | <b>CGCGATACGG</b>  | <b>ACATGGCATC</b>   | <b>AGACAGCAAA</b>  | <b>GCAACGGGCA</b>  | 1374 |

|                     |            |            |            |            |             |      |
|---------------------|------------|------------|------------|------------|-------------|------|
|                     |            |            | 7,720      |            | 7,740       |      |
| gDNA_Solyc03g095650 | AAAGACGGGC | GTCCGTCGAA | AAATGCGAGT | CCAGTGAGAA | GCAGGGCAGT  | 7750 |
| cDNA_Solyc03g095650 | AAAGACGGGC | GTCCGTCGAA | AAATGCGAGT | CCAGTGAGAA | GCAGGGCAGT  | 1456 |
| SIMLO5_LEAF         | AAAGACGGGC | GTCCGTCGAA | AAATGCGAGT | CCAGTGAGAA | GCAGGGCAGT  | 1355 |
| SIMLO5_FLOWER       | AAAGACGGGC | GTCCGTCGAA | AAATGCGAGT | CCAGTGAGAA | GCAGGGCAGT  | 1355 |
| SIMLO5_FRUIT        | AAAGACGGGC | GTCCGTCGAA | AAATGCGAGT | CCAGTGAGAA | GCAGGGCAGT  | 1424 |
|                     | 7,760      |            | 7,780      |            | 7,800       |      |
| gDNA_Solyc03g095650 | GTCACCATTT | CGTGGAGGTT | CCTCTCCGGT | TCAACAAAAA | CACGGGCAAT  | 7800 |
| cDNA_Solyc03g095650 | GTCACCATTT | CGTGGAGGTT | CCTCTCCGGT | TCAACAAAAA | CACGGGCAAT  | 1506 |
| SIMLO5_LEAF         | GTCACCATTT | CGTGGAGGTT | CCTCTCCGGT | TCAACAAAAA | CACGGGCAAT  | 1405 |
| SIMLO5_FLOWER       | GTCACCATTT | CGTGGAGGTT | CCTCTCCGGT | TCAACAAAAA | CACGGGCAAT  | 1405 |
| SIMLO5_FRUIT        | GTCACCATTT | CGTGGAGGTT | CCTCTCCGGT | TCAACAAAAA | CACGGGCAAT  | 1474 |
|                     |            | 7,820      |            | 7,840      |             |      |
| gDNA_Solyc03g095650 | TATATCCTCC | ATCACCTAAT | CCTTCGCGTA | GGAGGAGTGG | AGGTAATCCA  | 7850 |
| cDNA_Solyc03g095650 | TATATCCTCC | ATCACCTAAT | CCTTCGCGTA | GGAGGAGTGG | AGGTAATCCA  | 1556 |
| SIMLO5_LEAF         | TATATCCTCC | ATCACCTAAT | CCTTCGCGTA | GGAGGAGTGG | AGGTAATCCA  | 1455 |
| SIMLO5_FLOWER       | TATATCCTCC | ATCACCTAAT | CCTTCGCGTA | GGAGGAGTGG | AGGTAATCCA  | 1455 |
| SIMLO5_FRUIT        | TATATCCTCC | ATCACCTAAT | CCTTCGCGTA | GGAGGAGTGG | AGGTAATCCA  | 1524 |
|                     | 7,860      |            | 7,880      |            | 7,900       |      |
| gDNA_Solyc03g095650 | GAATCGAGTT | CTAGGCAAA  | CTTTGATGAT | GGAAGTCATG | AGCAA TCTGA | 7900 |
| cDNA_Solyc03g095650 | GAATCGAGTT | CTAGGCAAA  | CTTTGATGAT | GGAAGTCATG | AGCAA TCTGA | 1606 |
| SIMLO5_LEAF         | GAATCGAGTT | CTAGGCAAA  | CTTTGATGAT | GGAAGTCATG | AGCAA TCTGA | 1505 |
| SIMLO5_FLOWER       | GAATCGAGTT | CTAGGCAAA  | CTTTGATGAT | GGAAGTCATG | AGCAA TCTGA | 1505 |
| SIMLO5_FRUIT        | GAATCGAGTT | CTAGGCAAA  | CTTTGATGAT | GGAAGTCATG | AGCAA TCTGA | 1574 |
|                     |            | 7,920      |            | 7,940      |             |      |
| gDNA_Solyc03g095650 | AATTGAAATT | ACCTTGAATG | ATTTATCACT | TGAAAACAAA | TTAAGTTGAA  | 7950 |
| cDNA_Solyc03g095650 | AATTGAAATT | ACCTTGAATG | ATTTATCACT | TGAAAACAAA | TTAAGTTGAA  | 1656 |
| SIMLO5_LEAF         | AATTGAAATT | ACCTTGAATG | ATTTATCACT | TGAAAACAAA | TTAAGTTGA   | 1554 |
| SIMLO5_FLOWER       | AATTGAAATT | ACCTTGAATG | ATTTATCACT | TGAAAACAAA | TTAAGTTGA   | 1554 |
| SIMLO5_FRUIT        | AATTGAAATT | ACCTTGAATG | ATTTATCACT | TGAAAACAAA | TTAAGTTGA   | 1623 |
|                     | 7,960      |            | 7,980      |            | 8,000       |      |
| gDNA_Solyc03g095650 | CTTGTTAGGG | TCTGATCCAT | GTACGTATAT | AGTTAAGTAG | TGCATCTTGT  | 8000 |
| cDNA_Solyc03g095650 | CTTGTTAGGG | TCTGATCCAT | GTACGTATAT | AGTTAAGTAG | TGCATCTTGT  | 1706 |
| SIMLO5_LEAF         | -----      | -----      | -----      | -----      | -----       | 1554 |
| SIMLO5_FLOWER       | -----      | -----      | -----      | -----      | -----       | 1554 |
| SIMLO5_FRUIT        | -----      | -----      | -----      | -----      | -----       | 1623 |
|                     |            | 8,020      |            | 8,040      |             |      |
| gDNA_Solyc03g095650 | ACGTGTTTAC | CTTTGAAATC | TTTTTGTATA | ATTGTATGTG | GGAAC TGAGC | 8050 |
| cDNA_Solyc03g095650 | ACGTGTTTAC | CTTTGAAATC | TTTTTGTATA | ATTGTATGTG | GGAAC TGAGC | 1756 |
| SIMLO5_LEAF         | -----      | -----      | -----      | -----      | -----       | 1554 |
| SIMLO5_FLOWER       | -----      | -----      | -----      | -----      | -----       | 1554 |
| SIMLO5_FRUIT        | -----      | -----      | -----      | -----      | -----       | 1623 |
|                     | 8,060      |            | 8,080      |            | 8,100       |      |
| gDNA_Solyc03g095650 | TATGAAGCGC | CAAGTGTGTG | AATGTATTTT | TGGTACATTT | ATGGACTTGC  | 8100 |
| cDNA_Solyc03g095650 | TATGAAGCGC | CAAGTGTGTG | AATGTATTTT | TGGTACATTT | ATGGACTTGC  | 1806 |
| SIMLO5_LEAF         | -----      | -----      | -----      | -----      | -----       | 1554 |
| SIMLO5_FLOWER       | -----      | -----      | -----      | -----      | -----       | 1554 |
| SIMLO5_FRUIT        | -----      | -----      | -----      | -----      | -----       | 1623 |
|                     |            | 8,120      |            | 8,140      |             |      |
| gDNA_Solyc03g095650 | AAGTTGCACA | TATATTATGT | TGGTTCCTAT | GTTAAAAGTG | ATCTA       | 8145 |
| cDNA_Solyc03g095650 | AAGTTGCACA | TATATTATGT | TGGTTCCTAT | GTTAAAAGTG | ATCTA       | 1851 |
| SIMLO5_LEAF         | -----      | -----      | -----      | -----      | -----       | 1554 |
| SIMLO5_FLOWER       | -----      | -----      | -----      | -----      | -----       | 1554 |
| SIMLO5_FRUIT        | -----      | -----      | -----      | -----      | -----       | 1623 |

```

                20                               40
gDNA_Solyc02g082430 <GTGAATTGTT CCCTCAACGA CGTGAGAAAT TATACCAACT TGTGTCTAT 50
cDNA_Solyc02g082430 <GTGAATTGTT CCCTCAACGA CGTGAGAAAT TATACCAACT TGTGTCTAT 50
SIMLO6_LEAF -----
SIMLO6_ROOT <-----
SIMLO6_FLOWER <-----
SIMLO6_FRUIT <-----

                60                               80                               100
gDNA_Solyc02g082430 ACATATCTGT GAAATTATAC CTACCAAGTC TGGTCCTAAC TACTGCCAAT 100
cDNA_Solyc02g082430 ACATATCTGT GAAATTATAC CTACCAAGTC TGGTCCTAAC TACTGCCAAT 100
SIMLO6_LEAF -----
SIMLO6_ROOT -----
SIMLO6_FLOWER -----
SIMLO6_FRUIT -----

                120                              140
gDNA_Solyc02g082430 TCTATAAAAT TCCCTTTTAC CACTATAAAT ATTTATGTAC TACTTATTAC 150
cDNA_Solyc02g082430 TCTATAAAAT TCCCTTTTAC CACTATAAAT ATTTATGTAC TACTTATTAC 150
SIMLO6_LEAF -----
SIMLO6_ROOT -----
SIMLO6_FLOWER -----
SIMLO6_FRUIT -----

                160                              180                              200
gDNA_Solyc02g082430 AACTCTGTTT TAGTTGAAAA TGTATGTCTT TTTGGCATT TCTTGATTCT 200
cDNA_Solyc02g082430 AACTCTGTTT TAGTTGAAAA TGTATGTCTT TTTGGCATT TCTTGATTCT 200
SIMLO6_LEAF -----
SIMLO6_ROOT -----
SIMLO6_FLOWER -----
SIMLO6_FRUIT -----

                220                              240
gDNA_Solyc02g082430 TGAGAGTCTT TTGAGGGTTT TAACAAGAAC CCATTTAGTT TTCTTGAAAT 250
cDNA_Solyc02g082430 TGAGAGTCTT TTGAGGGTTT TAACAAGAAC CCATTTAGTT TTCTTGAAAT 250
SIMLO6_LEAF -----
SIMLO6_ROOT -----
SIMLO6_FLOWER -----
SIMLO6_FRUIT -----

                260                              280                              300
gDNA_Solyc02g082430 TCTTGATACA TCTGAAGCTG AAATACTGTG TTTCAAGATA AAGTTTGAAA 300
cDNA_Solyc02g082430 TCTTGATACA TCTGAAGCTG AAATACTGTG TTTCAAGATA AAGTTTGAAA 300
SIMLO6_LEAF -----
SIMLO6_ROOT -----
SIMLO6_FLOWER -----
SIMLO6_FRUIT -----

                320                              340
gDNA_Solyc02g082430 TTTTGTGGG TTGAGGGTTA GTAATGGCAG GTGGGGTGA TGGTACATCA 350
cDNA_Solyc02g082430 TTTTGTGGG TTGAGGGTTA GTAATGGCAG GTGGGGTGA TGGTACATCA 350
SIMLO6_LEAF -----
SIMLO6_ROOT -----
SIMLO6_FLOWER -----
SIMLO6_FRUIT -----
                360                              380                              400
gDNA_Solyc02g082430 AGGCAACTTG ATCAAACACC AACTTGGGCT GTGGCTGGTG TTTGTGCAGT 400
cDNA_Solyc02g082430 AGGCAACTTG ATCAAACACC AACTTGGGCT GTGGCTGGTG TTTGTGCAGT 400
SIMLO6_LEAF -----
SIMLO6_ROOT -----
SIMLO6_FLOWER -----
SIMLO6_FRUIT -----

                420                              440
gDNA_Solyc02g082430 TATTATCCTC ATTTCTATTG CCTTAGAGAA GATATTGCAC AAAC TTGGAA 450
cDNA_Solyc02g082430 TATTATCCTC ATTTCTATTG CCTTAGAGAA GATATTGCAC AAAC TTGGAA 450
SIMLO6_LEAF -----
SIMLO6_ROOT -----
SIMLO6_FLOWER -----
SIMLO6_FRUIT -----

                460                              480                              500
gDNA_Solyc02g082430 CGGTATGATG ACATAAAAC TTAGTCTTTC TTTGTTTCTT TAATGACCC T 500
cDNA_Solyc02g082430 CG----- ACATAAAAC TTAGTCTTTC TTTGTTTCTT TAATGACCC T 452
SIMLO6_LEAF -----
SIMLO6_ROOT -----
SIMLO6_FLOWER -----
SIMLO6_FRUIT -----

                520                              540
gDNA_Solyc02g082430 GTTCGTTGAC CTTCTGTTT TCGCTTTAGG AAGAAGAATT CTTGAATTT 550
cDNA_Solyc02g082430 -----
SIMLO6_LEAF -----
SIMLO6_ROOT -----
SIMLO6_FLOWER -----
SIMLO6_FRUIT -----

                560                              580                              600
gDNA_Solyc02g082430 GTTGTGATG TTTCTTGAAA ATATCTGTT TTTTGTGAAA AAATGTTGT 600
cDNA_Solyc02g082430 -----
SIMLO6_LEAF -----
SIMLO6_ROOT -----
SIMLO6_FLOWER -----
SIMLO6_FRUIT -----

```

|                     |                   |                   |                   |                    |                   |
|---------------------|-------------------|-------------------|-------------------|--------------------|-------------------|
|                     |                   | 620               |                   | 640                |                   |
| gDNA_Solyc02g082430 | <b>CTTTATTTAA</b> | <b>GTTAATTTTC</b> | <b>ACCCTTAATT</b> | <b>GTTCTTGAC</b>   | <b>TTTATCAACA</b> |
| cDNA_Solyc02g082430 | .....             | .....             | .....             | .....              | .....             |
| SIMLO6_LEAF         | .....             | .....             | .....             | .....              | .....             |
| SIMLO6_ROOT         | .....             | .....             | .....             | .....              | .....             |
| SIMLO6_FLOWER       | .....             | .....             | .....             | .....              | .....             |
| SIMLO6_FRUIT        | .....             | .....             | .....             | .....              | .....             |
|                     | 660               |                   | 680               |                    | 700               |
| gDNA_Solyc02g082430 | <b>AGTCTTAGCC</b> | <b>AAGAGCATT</b>  | <b>ATTAAAGTGG</b> | <b>GACCTGTAGT</b>  | <b>AGCTCTCTTT</b> |
| cDNA_Solyc02g082430 | .....             | .....             | .....             | .....              | .....             |
| SIMLO6_LEAF         | .....             | .....             | .....             | .....              | .....             |
| SIMLO6_ROOT         | .....             | .....             | .....             | .....              | .....             |
| SIMLO6_FLOWER       | .....             | .....             | .....             | .....              | .....             |
| SIMLO6_FRUIT        | .....             | .....             | .....             | .....              | .....             |
|                     |                   | 720               |                   | 740                |                   |
| gDNA_Solyc02g082430 | <b>TGTGTTTCCT</b> | <b>AGTTTTGGAA</b> | <b>ATCAAGGGT</b>  | <b>TTAAGTTGCA</b>  | <b>GCTATGTTGA</b> |
| cDNA_Solyc02g082430 | .....             | .....             | .....             | .....              | .....             |
| SIMLO6_LEAF         | .....             | .....             | .....             | .....              | .....             |
| SIMLO6_ROOT         | .....             | .....             | .....             | .....              | .....             |
| SIMLO6_FLOWER       | .....             | .....             | .....             | .....              | .....             |
| SIMLO6_FRUIT        | .....             | .....             | .....             | .....              | .....             |
|                     | 760               |                   | 780               |                    | 800               |
| gDNA_Solyc02g082430 | <b>TAATTGACTT</b> | <b>CTTATTTTGT</b> | <b>AACATCATT</b>  | <b>GACTGTGGAA</b>  | <b>GTCTTGCCTT</b> |
| cDNA_Solyc02g082430 | .....             | .....             | .....             | .....              | .....             |
| SIMLO6_LEAF         | .....             | .....             | .....             | .....              | .....             |
| SIMLO6_ROOT         | .....             | .....             | .....             | .....              | .....             |
| SIMLO6_FLOWER       | .....             | .....             | .....             | .....              | .....             |
| SIMLO6_FRUIT        | .....             | .....             | .....             | .....              | .....             |
|                     |                   | 820               |                   | 840                |                   |
| gDNA_Solyc02g082430 | <b>GCCAAATTGG</b> | <b>AAGTGATATC</b> | <b>ATGTCAACTA</b> | <b>TAAACTCTAG</b>  | <b>AACCTACAAA</b> |
| cDNA_Solyc02g082430 | .....             | .....             | .....             | .....              | .....             |
| SIMLO6_LEAF         | .....             | .....             | .....             | .....              | .....             |
| SIMLO6_ROOT         | .....             | .....             | .....             | .....              | .....             |
| SIMLO6_FLOWER       | .....             | .....             | .....             | .....              | .....             |
| SIMLO6_FRUIT        | .....             | .....             | .....             | .....              | .....             |
|                     | 860               |                   | 880               |                    | 900               |
| gDNA_Solyc02g082430 | <b>ATGTTCTTGA</b> | <b>TTGCTCAGAT</b> | <b>GCTTGTTCG</b>  | <b>TCCTCTATAT</b>  | <b>AATGATGGTG</b> |
| cDNA_Solyc02g082430 | .....             | .....             | .....             | .....              | .....             |
| SIMLO6_LEAF         | .....             | .....             | .....             | .....              | .....             |
| SIMLO6_ROOT         | .....             | .....             | .....             | .....              | .....             |
| SIMLO6_FLOWER       | .....             | .....             | .....             | .....              | .....             |
| SIMLO6_FRUIT        | .....             | .....             | .....             | .....              | .....             |
|                     |                   | 920               |                   | 940                |                   |
| gDNA_Solyc02g082430 | <b>ACCGAGCCTG</b> | <b>CTTGCACGCA</b> | <b>TCTTGATTAT</b> | <b>TACTCTGTGT</b>  | <b>CAGCTATAAG</b> |
| cDNA_Solyc02g082430 | .....             | .....             | .....             | .....              | .....             |
| SIMLO6_LEAF         | .....             | .....             | .....             | .....              | .....             |
| SIMLO6_ROOT         | .....             | .....             | .....             | .....              | .....             |
| SIMLO6_FLOWER       | .....             | .....             | .....             | .....              | .....             |
| SIMLO6_FRUIT        | .....             | .....             | .....             | .....              | .....             |
|                     | 960               |                   | 980               |                    | 1,000             |
| gDNA_Solyc02g082430 | <b>GAAAATGCAC</b> | <b>AATGGAAAAA</b> | <b>ACAAAGTGCT</b> | <b>ATCTGTGGGA</b>  | <b>GTATATGTAT</b> |
| cDNA_Solyc02g082430 | .....             | .....             | .....             | .....              | .....             |
| SIMLO6_LEAF         | .....             | .....             | .....             | .....              | .....             |
| SIMLO6_ROOT         | .....             | .....             | .....             | .....              | .....             |
| SIMLO6_FLOWER       | .....             | .....             | .....             | .....              | .....             |
| SIMLO6_FRUIT        | .....             | .....             | .....             | .....              | .....             |
|                     |                   | 1,020             |                   | 1,040              |                   |
| gDNA_Solyc02g082430 | <b>ATGAGTTCTC</b> | <b>GGTAATCATA</b> | <b>ATTCATAGTT</b> | <b>TTACTATGGC</b>  | <b>TATTCAAGTT</b> |
| cDNA_Solyc02g082430 | .....             | .....             | .....             | .....              | .....             |
| SIMLO6_LEAF         | .....             | .....             | .....             | .....              | .....             |
| SIMLO6_ROOT         | .....             | .....             | .....             | .....              | .....             |
| SIMLO6_FLOWER       | .....             | .....             | .....             | .....              | .....             |
| SIMLO6_FRUIT        | .....             | .....             | .....             | .....              | .....             |
|                     | 1,060             |                   | 1,080             |                    | 1,100             |
| gDNA_Solyc02g082430 | <b>GAGCTCGTGT</b> | <b>TTATTTACAG</b> | <b>TGATCCCTAA</b> | <b>TTTGTGATGG</b>  | <b>AAGTTACATG</b> |
| cDNA_Solyc02g082430 | .....             | .....             | .....             | .....              | .....             |
| SIMLO6_LEAF         | .....             | .....             | .....             | .....              | .....             |
| SIMLO6_ROOT         | .....             | .....             | .....             | .....              | .....             |
| SIMLO6_FLOWER       | .....             | .....             | .....             | .....              | .....             |
| SIMLO6_FRUIT        | .....             | .....             | .....             | .....              | .....             |
|                     |                   | 1,120             |                   | 1,140              |                   |
| gDNA_Solyc02g082430 | <b>ATTGAACAAA</b> | <b>GGAGTGAGTG</b> | <b>GATTCAAATG</b> | <b>AAGCGGCA TT</b> | <b>GGTATTGAGG</b> |
| cDNA_Solyc02g082430 | .....             | .....             | .....             | .....              | .....             |
| SIMLO6_LEAF         | .....             | .....             | .....             | .....              | .....             |
| SIMLO6_ROOT         | .....             | .....             | .....             | .....              | .....             |
| SIMLO6_FLOWER       | .....             | .....             | .....             | .....              | .....             |
| SIMLO6_FRUIT        | .....             | .....             | .....             | .....              | .....             |
|                     | 1,160             |                   | 1,180             |                    | 1,200             |
| gDNA_Solyc02g082430 | <b>ATTCGTATAG</b> | <b>CTAAACCAGT</b> | <b>CTAGAGGGTC</b> | <b>GGTAGTTACT</b>  | <b>GTTTCTGTTG</b> |
| cDNA_Solyc02g082430 | .....             | .....             | .....             | .....              | .....             |
| SIMLO6_LEAF         | .....             | .....             | .....             | .....              | .....             |
| SIMLO6_ROOT         | .....             | .....             | .....             | .....              | .....             |
| SIMLO6_FLOWER       | .....             | .....             | .....             | .....              | .....             |
| SIMLO6_FRUIT        | .....             | .....             | .....             | .....              | .....             |

|                     |                   |                   |                   |                   |                    |
|---------------------|-------------------|-------------------|-------------------|-------------------|--------------------|
|                     |                   | 1,220             |                   | 1,240             |                    |
| gDNA_Solyc02g082430 | <b>TTAATCTGCT</b> | <b>GCTGTAATAT</b> | <b>TAGCTCTCAA</b> | <b>ATCTTTTGCT</b> | <b>TTTAAGAAAG</b>  |
| cDNA_Solyc02g082430 | -----             | -----             | -----             | -----             | -----              |
| SIMLO6_LEAF         | -----             | -----             | -----             | -----             | -----              |
| SIMLO6_ROOT         | -----             | -----             | -----             | -----             | -----              |
| SIMLO6_FLOWER       | -----             | -----             | -----             | -----             | -----              |
| SIMLO6_FRUIT        | -----             | -----             | -----             | -----             | -----              |
|                     | 1,260             |                   | 1,280             |                   | 1,300              |
| gDNA_Solyc02g082430 | <b>CTGTAGTCTT</b> | <b>TATATGTATG</b> | <b>TATCCTGGAT</b> | <b>GATTTGCTTT</b> | <b>AGTACTATTG</b>  |
| cDNA_Solyc02g082430 | -----             | -----             | -----             | -----             | -----              |
| SIMLO6_LEAF         | -----             | -----             | -----             | -----             | -----              |
| SIMLO6_ROOT         | -----             | -----             | -----             | -----             | -----              |
| SIMLO6_FLOWER       | -----             | -----             | -----             | -----             | -----              |
| SIMLO6_FRUIT        | -----             | -----             | -----             | -----             | -----              |
|                     |                   | 1,320             |                   | 1,340             |                    |
| gDNA_Solyc02g082430 | <b>TTTCCTCTGT</b> | <b>TGCATATCGA</b> | <b>GAACAAGGA</b>  | <b>ACTACGACTA</b> | <b>CTGTTTTCTC</b>  |
| cDNA_Solyc02g082430 | -----             | -----             | -----             | -----             | -----              |
| SIMLO6_LEAF         | -----             | -----             | -----             | -----             | -----              |
| SIMLO6_ROOT         | -----             | -----             | -----             | -----             | -----              |
| SIMLO6_FLOWER       | -----             | -----             | -----             | -----             | -----              |
| SIMLO6_FRUIT        | -----             | -----             | -----             | -----             | -----              |
|                     | 1,360             |                   | 1,380             |                   | 1,400              |
| gDNA_Solyc02g082430 | <b>ACTTGGTTGG</b> | <b>TTTATTTGTG</b> | <b>CACTTTTGAG</b> | <b>TTGTTTTACA</b> | <b>CATATTGGTT</b>  |
| cDNA_Solyc02g082430 | -----             | -----             | -----             | -----             | -----              |
| SIMLO6_LEAF         | -----             | -----             | -----             | -----             | -----              |
| SIMLO6_ROOT         | -----             | -----             | -----             | -----             | -----              |
| SIMLO6_FLOWER       | -----             | -----             | -----             | -----             | -----              |
| SIMLO6_FRUIT        | -----             | -----             | -----             | -----             | -----              |
|                     |                   | 1,420             |                   | 1,440             |                    |
| gDNA_Solyc02g082430 | <b>CTTTGGACAA</b> | <b>CATAACTTCT</b> | <b>GATTGTTGTA</b> | <b>ATTGGTTCTT</b> | <b>TCTGCATCTT</b>  |
| cDNA_Solyc02g082430 | -----             | -----             | -----             | -----             | -----              |
| SIMLO6_LEAF         | -----             | -----             | -----             | -----             | -----              |
| SIMLO6_ROOT         | -----             | -----             | -----             | -----             | -----              |
| SIMLO6_FLOWER       | -----             | -----             | -----             | -----             | -----              |
| SIMLO6_FRUIT        | -----             | -----             | -----             | -----             | -----              |
|                     | 1,460             |                   | 1,480             |                   | 1,500              |
| gDNA_Solyc02g082430 | <b>ATTTAATTTT</b> | <b>GACCAGTAAA</b> | <b>CCAGGGATAA</b> | <b>GAGTGAAAAA</b> | <b>TAGTTCAATG</b>  |
| cDNA_Solyc02g082430 | -----             | -----             | -----             | -----             | -----              |
| SIMLO6_LEAF         | -----             | -----             | -----             | -----             | -----              |
| SIMLO6_ROOT         | -----             | -----             | -----             | -----             | -----              |
| SIMLO6_FLOWER       | -----             | -----             | -----             | -----             | -----              |
| SIMLO6_FRUIT        | -----             | -----             | -----             | -----             | -----              |
|                     |                   | 1,520             |                   | 1,540             |                    |
| gDNA_Solyc02g082430 | <b>TTTGTGTTGT</b> | <b>TCCTTGTGAA</b> | <b>CTTATTCCTT</b> | <b>TGTGCTGCAG</b> | <b>AAAATATCAA</b>  |
| cDNA_Solyc02g082430 | -----             | -----             | -----             | -----             | -----              |
| SIMLO6_LEAF         | -----             | -----             | -----             | -----             | -----              |
| SIMLO6_ROOT         | -----             | -----             | -----             | -----             | -----              |
| SIMLO6_FLOWER       | -----             | -----             | -----             | -----             | -----              |
| SIMLO6_FRUIT        | -----             | -----             | -----             | -----             | -----              |
|                     | 1,560             |                   | 1,580             |                   | 1,600              |
| gDNA_Solyc02g082430 | <b>TAACATTGAG</b> | <b>TTCGGATTCA</b> | <b>TTTTTCGTCC</b> | <b>TTTCATTTAA</b> | <b>TTGTAATAAC</b>  |
| cDNA_Solyc02g082430 | -----             | -----             | -----             | -----             | -----              |
| SIMLO6_LEAF         | -----             | -----             | -----             | -----             | -----              |
| SIMLO6_ROOT         | -----             | -----             | -----             | -----             | -----              |
| SIMLO6_FLOWER       | -----             | -----             | -----             | -----             | -----              |
| SIMLO6_FRUIT        | -----             | -----             | -----             | -----             | -----              |
|                     |                   | 1,620             |                   | 1,640             |                    |
| gDNA_Solyc02g082430 | <b>TTGCTTCTTT</b> | <b>TTATTTTCTT</b> | <b>CATTTTCCC</b>  | <b>CTTTTGGCT</b>  | <b>TTTGGTCAGC</b>  |
| cDNA_Solyc02g082430 | -----             | -----             | -----             | -----             | -----              |
| SIMLO6_LEAF         | -----             | -----             | -----             | -----             | -----              |
| SIMLO6_ROOT         | -----             | -----             | -----             | -----             | -----              |
| SIMLO6_FLOWER       | -----             | -----             | -----             | -----             | -----              |
| SIMLO6_FRUIT        | -----             | -----             | -----             | -----             | -----              |
|                     | 1,660             |                   | 1,680             |                   | 1,700              |
| gDNA_Solyc02g082430 | <b>ATTTTATAAC</b> | <b>CAAGTTTGCT</b> | <b>CCGCTATTGC</b> | <b>ACTGATATTG</b> | <b>AAGTTTGTG</b>   |
| cDNA_Solyc02g082430 | -----             | -----             | -----             | -----             | -----              |
| SIMLO6_LEAF         | -----             | -----             | -----             | -----             | -----              |
| SIMLO6_ROOT         | -----             | -----             | -----             | -----             | -----              |
| SIMLO6_FLOWER       | -----             | -----             | -----             | -----             | -----              |
| SIMLO6_FRUIT        | -----             | -----             | -----             | -----             | -----              |
|                     |                   | 1,720             |                   | 1,740             |                    |
| gDNA_Solyc02g082430 | <b>TCTTAAAGTT</b> | <b>TTTFACTTTT</b> | <b>CAAACTTAT</b>  | <b>TTTAATTGCA</b> | <b>TGAGTTGATG</b>  |
| cDNA_Solyc02g082430 | -----             | -----             | -----             | -----             | -----              |
| SIMLO6_LEAF         | -----             | -----             | -----             | -----             | -----              |
| SIMLO6_ROOT         | -----             | -----             | -----             | -----             | -----              |
| SIMLO6_FLOWER       | -----             | -----             | -----             | -----             | -----              |
| SIMLO6_FRUIT        | -----             | -----             | -----             | -----             | -----              |
|                     | 1,760             |                   | 1,780             |                   | 1,800              |
| gDNA_Solyc02g082430 | <b>TACTCAGCTC</b> | <b>ATTTGTTGGT</b> | <b>TCCTTGAATT</b> | <b>ACTACTACTA</b> | <b>TAGAAAAATAT</b> |
| cDNA_Solyc02g082430 | -----             | -----             | -----             | -----             | -----              |
| SIMLO6_LEAF         | -----             | -----             | -----             | -----             | -----              |
| SIMLO6_ROOT         | -----             | -----             | -----             | -----             | -----              |
| SIMLO6_FLOWER       | -----             | -----             | -----             | -----             | -----              |
| SIMLO6_FRUIT        | -----             | -----             | -----             | -----             | -----              |

|                     |                      |                   |                   |                   |                   |      |
|---------------------|----------------------|-------------------|-------------------|-------------------|-------------------|------|
|                     |                      | 1,820             |                   | 1,840             |                   |      |
| gDNA_Solyc02g082430 | <b>GAATAACTGA</b>    | <b>CACAATGAAA</b> | <b>TCTTTGCTCA</b> | <b>GTGGTTGACT</b> | <b>GACAGGCATA</b> | 1850 |
| cDNA_Solyc02g082430 | -----                | -----             | -----             | -TGGTTGACT        | GACAGGCATA        | 471  |
| SIMLO6_LEAF         | -----                | -----             | -----             | -TGGTTGACT        | GACAGGCATA        | 148  |
| SIMLO6_ROOT         | -----                | -----             | -----             | -TGGTTGACT        | GACAGGCATA        | 148  |
| SIMLO6_FLOWER       | -----                | -----             | -----             | -TGGTTGACT        | GACAGGCATA        | 148  |
| SIMLO6_FRUIT        | -----                | -----             | -----             | -TGGTTGACT        | GACAGGCATA        | 148  |
|                     | 1,860                |                   | 1,880             |                   | 1,900             |      |
| gDNA_Solyc02g082430 | <b>AAAAAGC T C T</b> | <b>CTTTGAGGCC</b> | <b>TTGGAGAAGG</b> | <b>TTAAGGCCGG</b> | <b>TAAGATTTT</b>  | 1900 |
| cDNA_Solyc02g082430 | AAAAAGC T C T        | CTTTGAGGCC        | TTGGAGAAGG        | TTAAGGCCG         | -----             | 510  |
| SIMLO6_LEAF         | AAAAAGC T C T        | CTTTGAGGCC        | TTGGAGAAGG        | TTAAGGCCG         | -----             | 187  |
| SIMLO6_ROOT         | AAAAAGC T C T        | CTTTGAGGCC        | TTGGAGAAGG        | TTAAGGCCG         | -----             | 187  |
| SIMLO6_FLOWER       | AAAAAGC T C T        | CTTTGAGGCC        | TTGGAGAAGG        | TTAAGGCCG         | -----             | 187  |
| SIMLO6_FRUIT        | AAAAAGC T C T        | CTTTGAGGCC        | TTGGAGAAGG        | TTAAGGCCG         | -----             | 187  |
|                     | 1,920                |                   | 1,940             |                   |                   |      |
| gDNA_Solyc02g082430 | <b>TCTTTCTCCT</b>    | <b>CTTGTTATCA</b> | <b>TTTTTTTATT</b> | <b>AGAGGTGACG</b> | <b>TGTTTCATT</b>  | 1950 |
| cDNA_Solyc02g082430 | -----                | -----             | -----             | -----             | -----             | 510  |
| SIMLO6_LEAF         | -----                | -----             | -----             | -----             | -----             | 187  |
| SIMLO6_ROOT         | -----                | -----             | -----             | -----             | -----             | 187  |
| SIMLO6_FLOWER       | -----                | -----             | -----             | -----             | -----             | 187  |
| SIMLO6_FRUIT        | -----                | -----             | -----             | -----             | -----             | 187  |
|                     | 1,960                |                   | 1,980             |                   | 2,000             |      |
| gDNA_Solyc02g082430 | <b>TTGATTGAAT</b>    | <b>CATCTAATTC</b> | <b>TTGCAGAGTT</b> | <b>GATGATTCTC</b> | <b>GGTTTCATCT</b> | 2000 |
| cDNA_Solyc02g082430 | -----                | -----             | -----AGTT         | GATGATTCTC        | GGTTTCATCT        | 534  |
| SIMLO6_LEAF         | -----                | -----             | -----AGTT         | GATGATTCTC        | GGTTTCATCT        | 211  |
| SIMLO6_ROOT         | -----                | -----             | -----AGTT         | GATGATTCTC        | GGTTTCATCT        | 211  |
| SIMLO6_FLOWER       | -----                | -----             | -----AGTT         | GATGATTCTC        | GGTTTCATCT        | 211  |
| SIMLO6_FRUIT        | -----                | -----             | -----AGTT         | GATGATTCTC        | GGTTTCATCT        | 211  |
|                     | 2,020                |                   | 2,040             |                   |                   |      |
| gDNA_Solyc02g082430 | <b>CGTTAACCCT</b>    | <b>TGTATTTAGT</b> | <b>CAATATTACA</b> | <b>TTGCTGGAAT</b> | <b>TTGTATCCCC</b> | 2050 |
| cDNA_Solyc02g082430 | CGTTAACCCT           | TGTATTTAGT        | CAATATTACA        | TTGCTGGAAT        | TTGTATCCCC        | 584  |
| SIMLO6_LEAF         | CGTTAACCCT           | TGTATTTAGT        | CAATATTACA        | TTGCTGGAAT        | TTGTATCCCC        | 261  |
| SIMLO6_ROOT         | CGTTAACCCT           | TGTATTTAGT        | CAATATTACA        | TTGCTGGAAT        | TTGTATCCCC        | 261  |
| SIMLO6_FLOWER       | CGTTAACCCT           | TGTATTTAGT        | CAATATTACA        | TTGCTGGAAT        | TTGTATCCCC        | 261  |
| SIMLO6_FRUIT        | CGTTAACCCT           | TGTATTTAGT        | CAATATTACA        | TTGCTGGAAT        | TTGTATCCCC        | 261  |
|                     | 2,060                |                   | 2,080             |                   | 2,100             |      |
| gDNA_Solyc02g082430 | <b>CCAAGTGTTG</b>    | <b>CTGATACAA</b>  | <b>GTTGCCATGC</b> | <b>CCTGCAAACA</b> | <b>ACAAAGATGC</b> | 2100 |
| cDNA_Solyc02g082430 | CCAAGTGTTG           | CTGATACAA         | GTTGCCATGC        | CCTGCAAACA        | ACAAAGATGC        | 634  |
| SIMLO6_LEAF         | CCAAGTGTTG           | CTGATACAA         | GTTGCCATGC        | CCTGCAAACA        | ACAAAGATGC        | 311  |
| SIMLO6_ROOT         | CCAAGTGTTG           | CTGATACAA         | GTTGCCATGC        | CCTGCAAACA        | ACAAAGATGC        | 311  |
| SIMLO6_FLOWER       | CCAAGTGTTG           | CTGATACAA         | GTTGCCATGC        | CCTGCAAACA        | ACAAAGATGC        | 311  |
| SIMLO6_FRUIT        | CCAAGTGTTG           | CTGATACAA         | GTTGCCATGC        | CCTGCAAACA        | ACAAAGATGC        | 311  |
|                     | 2,120                |                   | 2,140             |                   |                   |      |
| gDNA_Solyc02g082430 | <b>AGCAAAGGAG</b>    | <b>GAGGAACACC</b> | <b>GTAGGAAGC</b>  | <b>TTTATGGTAT</b> | <b>GAGCGTAGAA</b> | 2150 |
| cDNA_Solyc02g082430 | AGCAAAGGAG           | GAGGAACACC        | GTAGGAAGC         | TTTATGGTAT        | GAGCGTAGAA        | 684  |
| SIMLO6_LEAF         | AGCAAAGGAG           | GAGGAACACC        | GTAGGAAGC         | TTTATGGTAT        | GAGCGTAGAA        | 361  |
| SIMLO6_ROOT         | AGCAAAGGAG           | GAGGAACACC        | GTAGGAAGC         | TTTATGGTAT        | GAGCGTAGAA        | 361  |
| SIMLO6_FLOWER       | AGCAAAGGAG           | GAGGAACACC        | GTAGGAAGC         | TTTATGGTAT        | GAGCGTAGAA        | 361  |
| SIMLO6_FRUIT        | AGCAAAGGAG           | GAGGAACACC        | GTAGGAAGC         | TTTATGGTAT        | GAGCGTAGAA        | 361  |
|                     | 2,160                |                   | 2,180             |                   | 2,200             |      |
| gDNA_Solyc02g082430 | <b>TTTTGGCAGG</b>    | <b>TGCAGAGCCT</b> | <b>AAATGCAAAG</b> | <b>AGGTAACGTG</b> | <b>TAGATGGCCC</b> | 2200 |
| cDNA_Solyc02g082430 | TTTTGGCAGG           | TGCAGAGCCT        | AAATGCAAAG        | -----             | -----             | 714  |
| SIMLO6_LEAF         | TTTTGGCAGG           | TGCAGAGCCT        | AAATGCAAAG        | -----             | -----             | 391  |
| SIMLO6_ROOT         | TTTTGGCAGG           | TGCAGAGCCT        | AAATGCAAAG        | -----             | -----             | 391  |
| SIMLO6_FLOWER       | TTTTGGCAGG           | TGCAGAGCCT        | AAATGCAAAG        | -----             | -----             | 391  |
| SIMLO6_FRUIT        | TTTTGGCAGG           | TGCAGAGCCT        | AAATGCAAAG        | -----             | -----             | 391  |
|                     | 2,220                |                   | 2,240             |                   |                   |      |
| gDNA_Solyc02g082430 | <b>TTGACAATAT</b>    | <b>GGGTCAGACT</b> | <b>TCACTGATGT</b> | <b>ATTTAGTTGT</b> | <b>ATTAATGAGT</b> | 2250 |
| cDNA_Solyc02g082430 | -----                | -----             | -----             | -----             | -----             | 714  |
| SIMLO6_LEAF         | -----                | -----             | -----             | -----             | -----             | 391  |
| SIMLO6_ROOT         | -----                | -----             | -----             | -----             | -----             | 391  |
| SIMLO6_FLOWER       | -----                | -----             | -----             | -----             | -----             | 391  |
| SIMLO6_FRUIT        | -----                | -----             | -----             | -----             | -----             | 391  |
|                     | 2,260                |                   | 2,280             |                   | 2,300             |      |
| gDNA_Solyc02g082430 | <b>ACTGATAGCA</b>    | <b>AAAATGGCTC</b> | <b>TGGGAGAGTT</b> | <b>GTGCTTTTGG</b> | <b>TAAATTTACT</b> | 2300 |
| cDNA_Solyc02g082430 | -----                | -----             | -----             | -----             | -----             | 714  |
| SIMLO6_LEAF         | -----                | -----             | -----             | -----             | -----             | 391  |
| SIMLO6_ROOT         | -----                | -----             | -----             | -----             | -----             | 391  |
| SIMLO6_FLOWER       | -----                | -----             | -----             | -----             | -----             | 391  |
| SIMLO6_FRUIT        | -----                | -----             | -----             | -----             | -----             | 391  |
|                     | 2,320                |                   | 2,340             |                   |                   |      |
| gDNA_Solyc02g082430 | <b>AATCCTATCT</b>    | <b>TGAATTACAA</b> | <b>ATGGAGACAT</b> | <b>TACTAAGAGG</b> | <b>GTGTTAGGAT</b> | 2350 |
| cDNA_Solyc02g082430 | -----                | -----             | -----             | -----             | -----             | 714  |
| SIMLO6_LEAF         | -----                | -----             | -----             | -----             | -----             | 391  |
| SIMLO6_ROOT         | -----                | -----             | -----             | -----             | -----             | 391  |
| SIMLO6_FLOWER       | -----                | -----             | -----             | -----             | -----             | 391  |
| SIMLO6_FRUIT        | -----                | -----             | -----             | -----             | -----             | 391  |
|                     | 2,360                |                   | 2,380             |                   | 2,400             |      |
| gDNA_Solyc02g082430 | <b>TGGCTTAAAA</b>    | <b>GTTGGTCAAA</b> | <b>CCTACTTTTA</b> | <b>AGTTAGTTTT</b> | <b>TGACTTATAG</b> | 2400 |
| cDNA_Solyc02g082430 | -----                | -----             | -----             | -----             | -----             | 714  |
| SIMLO6_LEAF         | -----                | -----             | -----             | -----             | -----             | 391  |
| SIMLO6_ROOT         | -----                | -----             | -----             | -----             | -----             | 391  |
| SIMLO6_FLOWER       | -----                | -----             | -----             | -----             | -----             | 391  |
| SIMLO6_FRUIT        | -----                | -----             | -----             | -----             | -----             | 391  |



|                     |                   |                    |                   |                   |                    |      |
|---------------------|-------------------|--------------------|-------------------|-------------------|--------------------|------|
|                     |                   | 2,420              |                   | 2,440             |                    |      |
| gDNA_Solyc02g082430 | <b>AAGTGCCTGA</b> | <b>AAAGCATAAA</b>  | <b>AAATAACTTA</b> | <b>AAATAAGTCA</b> | <b>AAAATGACTT</b>  | 2450 |
| cDNA_Solyc02g082430 | -----             | -----              | -----             | -----             | -----              | 714  |
| SIMLO6_LEAF         | -----             | -----              | -----             | -----             | -----              | 391  |
| SIMLO6_ROOT         | -----             | -----              | -----             | -----             | -----              | 391  |
| SIMLO6_FLOWER       | -----             | -----              | -----             | -----             | -----              | 391  |
| SIMLO6_FRUIT        | -----             | -----              | -----             | -----             | -----              | 391  |
|                     | 2,460             |                    | 2,480             |                   | 2,500              |      |
| gDNA_Solyc02g082430 | <b>AAGATTAGTT</b> | <b>GAGAAGTGTT</b>  | <b>TGGCAATGTC</b> | <b>AAGAATGACT</b> | <b>TAAAATAAGT</b>  | 2500 |
| cDNA_Solyc02g082430 | -----             | -----              | -----             | -----             | -----              | 714  |
| SIMLO6_LEAF         | -----             | -----              | -----             | -----             | -----              | 391  |
| SIMLO6_ROOT         | -----             | -----              | -----             | -----             | -----              | 391  |
| SIMLO6_FLOWER       | -----             | -----              | -----             | -----             | -----              | 391  |
| SIMLO6_FRUIT        | -----             | -----              | -----             | -----             | -----              | 391  |
|                     |                   | 2,520              |                   | 2,540             |                    |      |
| gDNA_Solyc02g082430 | <b>TTAAAATGAC</b> | <b>TTAGAATAAG</b>  | <b>TCAAAAATCA</b> | <b>AAAGTAGGTC</b> | <b>TCCCCCTACT</b>  | 2550 |
| cDNA_Solyc02g082430 | -----             | -----              | -----             | -----             | -----              | 714  |
| SIMLO6_LEAF         | -----             | -----              | -----             | -----             | -----              | 391  |
| SIMLO6_ROOT         | -----             | -----              | -----             | -----             | -----              | 391  |
| SIMLO6_FLOWER       | -----             | -----              | -----             | -----             | -----              | 391  |
| SIMLO6_FRUIT        | -----             | -----              | -----             | -----             | -----              | 391  |
|                     | 2,560             |                    | 2,580             |                   | 2,600              |      |
| gDNA_Solyc02g082430 | <b>TTTTATTTTT</b> | <b>TAACATAAAA</b>  | <b>TTTCAGTTTG</b> | <b>ACTTTTTATT</b> | <b>TTTGACTTAA</b>  | 2600 |
| cDNA_Solyc02g082430 | -----             | -----              | -----             | -----             | -----              | 714  |
| SIMLO6_LEAF         | -----             | -----              | -----             | -----             | -----              | 391  |
| SIMLO6_ROOT         | -----             | -----              | -----             | -----             | -----              | 391  |
| SIMLO6_FLOWER       | -----             | -----              | -----             | -----             | -----              | 391  |
| SIMLO6_FRUIT        | -----             | -----              | -----             | -----             | -----              | 391  |
|                     |                   | 2,620              |                   | 2,640             |                    |      |
| gDNA_Solyc02g082430 | <b>AAGTTACTTT</b> | <b>TTTTTTTAAAG</b> | <b>CCAATCCAAA</b> | <b>CAGGCCCAA</b>  | <b>ATGTTTTTTC</b>  | 2650 |
| cDNA_Solyc02g082430 | -----             | -----              | -----             | -----             | -----              | 714  |
| SIMLO6_LEAF         | -----             | -----              | -----             | -----             | -----              | 391  |
| SIMLO6_ROOT         | -----             | -----              | -----             | -----             | -----              | 391  |
| SIMLO6_FLOWER       | -----             | -----              | -----             | -----             | -----              | 391  |
| SIMLO6_FRUIT        | -----             | -----              | -----             | -----             | -----              | 391  |
|                     | 2,660             |                    | 2,680             |                   | 2,700              |      |
| gDNA_Solyc02g082430 | <b>GCTTCTATCA</b> | <b>ATTGGCCTAG</b>  | <b>ACAATGAGAT</b> | <b>ATTTTGAGCA</b> | <b>AACCTACTAA</b>  | 2700 |
| cDNA_Solyc02g082430 | -----             | -----              | -----             | -----             | -----              | 714  |
| SIMLO6_LEAF         | -----             | -----              | -----             | -----             | -----              | 391  |
| SIMLO6_ROOT         | -----             | -----              | -----             | -----             | -----              | 391  |
| SIMLO6_FLOWER       | -----             | -----              | -----             | -----             | -----              | 391  |
| SIMLO6_FRUIT        | -----             | -----              | -----             | -----             | -----              | 391  |
|                     |                   | 2,720              |                   | 2,740             |                    |      |
| gDNA_Solyc02g082430 | <b>AAATTATTGC</b> | <b>AAACTGTCTT</b>  | <b>AGGATTTTCG</b> | <b>ACTCTTCAAT</b> | <b>TCAAATGAAT</b>  | 2750 |
| cDNA_Solyc02g082430 | -----             | -----              | -----             | -----             | -----              | 714  |
| SIMLO6_LEAF         | -----             | -----              | -----             | -----             | -----              | 391  |
| SIMLO6_ROOT         | -----             | -----              | -----             | -----             | -----              | 391  |
| SIMLO6_FLOWER       | -----             | -----              | -----             | -----             | -----              | 391  |
| SIMLO6_FRUIT        | -----             | -----              | -----             | -----             | -----              | 391  |
|                     | 2,760             |                    | 2,780             |                   | 2,800              |      |
| gDNA_Solyc02g082430 | <b>GGACATTTCA</b> | <b>AATAACATGG</b>  | <b>TGTCATCACA</b> | <b>AAAAAGGAAC</b> | <b>TGCAAAAGAA</b>  | 2800 |
| cDNA_Solyc02g082430 | -----             | -----              | -----             | -----             | -----              | 714  |
| SIMLO6_LEAF         | -----             | -----              | -----             | -----             | -----              | 391  |
| SIMLO6_ROOT         | -----             | -----              | -----             | -----             | -----              | 391  |
| SIMLO6_FLOWER       | -----             | -----              | -----             | -----             | -----              | 391  |
| SIMLO6_FRUIT        | -----             | -----              | -----             | -----             | -----              | 391  |
|                     |                   | 2,820              |                   | 2,840             |                    |      |
| gDNA_Solyc02g082430 | <b>ATTTTACACA</b> | <b>AAGCACCTTC</b>  | <b>ATTCCATTAG</b> | <b>GGTGTATGCC</b> | <b>AAGTGATGGA</b>  | 2850 |
| cDNA_Solyc02g082430 | -----             | -----              | -----             | -----             | -----              | 714  |
| SIMLO6_LEAF         | -----             | -----              | -----             | -----             | -----              | 391  |
| SIMLO6_ROOT         | -----             | -----              | -----             | -----             | -----              | 391  |
| SIMLO6_FLOWER       | -----             | -----              | -----             | -----             | -----              | 391  |
| SIMLO6_FRUIT        | -----             | -----              | -----             | -----             | -----              | 391  |
|                     | 2,860             |                    | 2,880             |                   | 2,900              |      |
| gDNA_Solyc02g082430 | <b>CTCATGTAGT</b> | <b>GTAGCCTAAT</b>  | <b>TGAGGATTAG</b> | <b>GAAACACTTA</b> | <b>GCTTTTTACC</b>  | 2900 |
| cDNA_Solyc02g082430 | -----             | -----              | -----             | -----             | -----              | 714  |
| SIMLO6_LEAF         | -----             | -----              | -----             | -----             | -----              | 391  |
| SIMLO6_ROOT         | -----             | -----              | -----             | -----             | -----              | 391  |
| SIMLO6_FLOWER       | -----             | -----              | -----             | -----             | -----              | 391  |
| SIMLO6_FRUIT        | -----             | -----              | -----             | -----             | -----              | 391  |
|                     |                   | 2,920              |                   | 2,940             |                    |      |
| gDNA_Solyc02g082430 | <b>ATCACTGTTT</b> | <b>TATTCTTACG</b>  | <b>CTATCCTGTC</b> | <b>TGACATAGGA</b> | <b>AGAAGGAA TT</b> | 2950 |
| cDNA_Solyc02g082430 | -----             | -----              | -----             | -----             | -----              | 714  |
| SIMLO6_LEAF         | -----             | -----              | -----             | -----             | -----              | 391  |
| SIMLO6_ROOT         | -----             | -----              | -----             | -----             | -----              | 391  |
| SIMLO6_FLOWER       | -----             | -----              | -----             | -----             | -----              | 391  |
| SIMLO6_FRUIT        | -----             | -----              | -----             | -----             | -----              | 391  |
|                     | 2,960             |                    | 2,980             |                   | 3,000              |      |
| gDNA_Solyc02g082430 | <b>GATGACTAAA</b> | <b>AAAGCACCAT</b>  | <b>GTATGCGCTT</b> | <b>CAACTGTCTT</b> | <b>TAGACTATGA</b>  | 3000 |
| cDNA_Solyc02g082430 | -----             | -----              | -----             | -----             | -----              | 714  |
| SIMLO6_LEAF         | -----             | -----              | -----             | -----             | -----              | 391  |
| SIMLO6_ROOT         | -----             | -----              | -----             | -----             | -----              | 391  |
| SIMLO6_FLOWER       | -----             | -----              | -----             | -----             | -----              | 391  |
| SIMLO6_FRUIT        | -----             | -----              | -----             | -----             | -----              | 391  |

|                     |                    |                    |                   |                    |                   |      |
|---------------------|--------------------|--------------------|-------------------|--------------------|-------------------|------|
|                     |                    |                    | 3,020             |                    | 3,040             |      |
| gDNA_Solyc02g082430 | <b>GCTTCAAAA</b>   | <b>TTTGTGGTCG</b>  | <b>GCTTAGGTTT</b> | <b>TGGGTA AATT</b> | <b>TTTCATGTAA</b> | 3050 |
| cDNA_Solyc02g082430 | -----              | -----              | -----             | -----              | -----             | 714  |
| SIMLO6_LEAF         | -----              | -----              | -----             | -----              | -----             | 391  |
| SIMLO6_ROOT         | -----              | -----              | -----             | -----              | -----             | 391  |
| SIMLO6_FLOWER       | -----              | -----              | -----             | -----              | -----             | 391  |
| SIMLO6_FRUIT        | -----              | -----              | -----             | -----              | -----             | 391  |
|                     | 3,060              |                    | 3,080             |                    | 3,100             |      |
| gDNA_Solyc02g082430 | <b>AGTTAATATT</b>  | <b>TGAAGGTAAA</b>  | <b>GTTGTTCTAC</b> | <b>CAGATGCAGC</b>  | <b>ATCCTTGCAT</b> | 3100 |
| cDNA_Solyc02g082430 | -----              | -----              | -----             | -----              | -----             | 714  |
| SIMLO6_LEAF         | -----              | -----              | -----             | -----              | -----             | 391  |
| SIMLO6_ROOT         | -----              | -----              | -----             | -----              | -----             | 391  |
| SIMLO6_FLOWER       | -----              | -----              | -----             | -----              | -----             | 391  |
| SIMLO6_FRUIT        | -----              | -----              | -----             | -----              | -----             | 391  |
|                     |                    | 3,120              |                   | 3,140              |                   |      |
| gDNA_Solyc02g082430 | <b>TCCGTTAGCA</b>  | <b>CTGTGTTCTG</b>  | <b>GCCCATCTTT</b> | <b>TTCAGCTATA</b>  | <b>TTTTGGACCT</b> | 3150 |
| cDNA_Solyc02g082430 | -----              | -----              | -----             | -----              | -----             | 714  |
| SIMLO6_LEAF         | -----              | -----              | -----             | -----              | -----             | 391  |
| SIMLO6_ROOT         | -----              | -----              | -----             | -----              | -----             | 391  |
| SIMLO6_FLOWER       | -----              | -----              | -----             | -----              | -----             | 391  |
| SIMLO6_FRUIT        | -----              | -----              | -----             | -----              | -----             | 391  |
|                     | 3,160              |                    | 3,180             |                    | 3,200             |      |
| gDNA_Solyc02g082430 | <b>TTTATGTGGT</b>  | <b>ACTTATTATT</b>  | <b>AGCATCAACA</b> | <b>GCAAGCTTTC</b>  | <b>CTTCTTTCAT</b> | 3200 |
| cDNA_Solyc02g082430 | -----              | -----              | -----             | -----              | -----             | 714  |
| SIMLO6_LEAF         | -----              | -----              | -----             | -----              | -----             | 391  |
| SIMLO6_ROOT         | -----              | -----              | -----             | -----              | -----             | 391  |
| SIMLO6_FLOWER       | -----              | -----              | -----             | -----              | -----             | 391  |
| SIMLO6_FRUIT        | -----              | -----              | -----             | -----              | -----             | 391  |
|                     |                    | 3,220              |                   | 3,240              |                   |      |
| gDNA_Solyc02g082430 | <b>CAAAC TAATC</b> | <b>TAAAGTATTC</b>  | <b>CTATCAGGGA</b> | <b>CGTGTACCGC</b>  | <b>TTGTTACTGT</b> | 3250 |
| cDNA_Solyc02g082430 | -----              | -----              | -----AGGGA        | <b>CGTGTACCGC</b>  | <b>TTGTTACTGT</b> | 739  |
| SIMLO6_LEAF         | -----              | -----              | -----AGGGA        | <b>CGTGTACCGC</b>  | <b>TTGTTACTGT</b> | 416  |
| SIMLO6_ROOT         | -----              | -----              | -----AGGGA        | <b>CGTGTACCGC</b>  | <b>TTGTTACTGT</b> | 416  |
| SIMLO6_FLOWER       | -----              | -----              | -----AGGGA        | <b>CGTGTACCGC</b>  | <b>TTGTTACTGT</b> | 416  |
| SIMLO6_FRUIT        | -----              | -----              | -----AGGGA        | <b>CGTGTACCGC</b>  | <b>TTGTTACTGT</b> | 416  |
|                     | 3,260              |                    | 3,280             |                    | 3,300             |      |
| gDNA_Solyc02g082430 | <b>TGAAGCAGTG</b>  | <b>CATCAAA TAC</b> | <b>ACATCCTCAT</b> | <b>TTTCTTTTTG</b>  | <b>GCAGTCCTTC</b> | 3300 |
| cDNA_Solyc02g082430 | <b>TGAAGCAGTG</b>  | <b>CATCAAA TAC</b> | <b>ACATCCTCAT</b> | <b>TTTCTTTTTG</b>  | <b>GCAGTCCTTC</b> | 789  |
| SIMLO6_LEAF         | <b>TGAAGCAGTG</b>  | <b>CATCAAA TAC</b> | <b>ACATCCTCAT</b> | <b>TTTCTTTTTG</b>  | <b>GCAGTCCTTC</b> | 466  |
| SIMLO6_ROOT         | <b>TGAAGCAGTG</b>  | <b>CATCAAA TAC</b> | <b>ACATCCTCAT</b> | <b>TTTCTTTTTG</b>  | <b>GCAGTCCTTC</b> | 466  |
| SIMLO6_FLOWER       | <b>TGAAGCAGTG</b>  | <b>CATCAAA TAC</b> | <b>ACATCCTCAT</b> | <b>TTTCTTTTTG</b>  | <b>GCAGTCCTTC</b> | 466  |
| SIMLO6_FRUIT        | <b>TGAAGCAGTG</b>  | <b>CATCAAA TAC</b> | <b>ACATCCTCAT</b> | <b>TTTCTTTTTG</b>  | <b>GCAGTCCTTC</b> | 466  |
|                     |                    | 3,320              |                   | 3,340              |                   |      |
| gDNA_Solyc02g082430 | <b>ATGTGTTATA</b>  | <b>CAGTGCGATT</b>  | <b>ACCATGTGGT</b> | <b>TGGGAAGACT</b>  | <b>TAAGTAATT</b>  | 3350 |
| cDNA_Solyc02g082430 | <b>ATGTGTTATA</b>  | <b>CAGTGCGATT</b>  | <b>ACCATGTGGT</b> | <b>TGGGAAGACT</b>  | <b>TAAG-----</b>  | 833  |
| SIMLO6_LEAF         | <b>ATGTGTTATA</b>  | <b>CAGTGCGATT</b>  | <b>ACCATGTGGT</b> | <b>TGGGAAGACT</b>  | <b>TAAG-----</b>  | 510  |
| SIMLO6_ROOT         | <b>ATGTGTTATA</b>  | <b>CAGTGCGATT</b>  | <b>ACCATGTGGT</b> | <b>TGGGAAGACT</b>  | <b>TAAG-----</b>  | 510  |
| SIMLO6_FLOWER       | <b>ATGTGTTATA</b>  | <b>CAGTGCGATT</b>  | <b>ACCATGTGGT</b> | <b>TGGGAAGACT</b>  | <b>TAAG-----</b>  | 510  |
| SIMLO6_FRUIT        | <b>ATGTGTTATA</b>  | <b>CAGTGCGATT</b>  | <b>ACCATGTGGT</b> | <b>TGGGAAGACT</b>  | <b>TAAG-----</b>  | 510  |
|                     | 3,360              |                    | 3,380             |                    | 3,400             |      |
| gDNA_Solyc02g082430 | <b>CATAATATAC</b>  | <b>TTTATTTAGT</b>  | <b>TATTCCTCTA</b> | <b>CTATGCTTTA</b>  | <b>GTTGCCATCT</b> | 3400 |
| cDNA_Solyc02g082430 | -----              | -----              | -----             | -----              | -----             | 833  |
| SIMLO6_LEAF         | -----              | -----              | -----             | -----              | -----             | 510  |
| SIMLO6_ROOT         | -----              | -----              | -----             | -----              | -----             | 510  |
| SIMLO6_FLOWER       | -----              | -----              | -----             | -----              | -----             | 510  |
| SIMLO6_FRUIT        | -----              | -----              | -----             | -----              | -----             | 510  |
|                     |                    | 3,420              |                   | 3,440              |                   |      |
| gDNA_Solyc02g082430 | <b>ATACTGCTTC</b>  | <b>TTAGGTAATC</b>  | <b>CAGGAAGGTT</b> | <b>GTAGGTCCCA</b>  | <b>ATTATTGACT</b> | 3450 |
| cDNA_Solyc02g082430 | -----              | -----              | -----             | -----              | -----             | 833  |
| SIMLO6_LEAF         | -----              | -----              | -----             | -----              | -----             | 510  |
| SIMLO6_ROOT         | -----              | -----              | -----             | -----              | -----             | 510  |
| SIMLO6_FLOWER       | -----              | -----              | -----             | -----              | -----             | 510  |
| SIMLO6_FRUIT        | -----              | -----              | -----             | -----              | -----             | 510  |
|                     | 3,460              |                    | 3,480             |                    | 3,500             |      |
| gDNA_Solyc02g082430 | <b>GCATTTT TAG</b> | <b>TAGATTTTCA</b>  | <b>ATTAAC TAC</b> | <b>AAGATCAGTC</b>  | <b>AAATTTTCAT</b> | 3500 |
| cDNA_Solyc02g082430 | -----              | -----              | -----             | -----              | -----             | 833  |
| SIMLO6_LEAF         | -----              | -----              | -----             | -----              | -----             | 510  |
| SIMLO6_ROOT         | -----              | -----              | -----             | -----              | -----             | 510  |
| SIMLO6_FLOWER       | -----              | -----              | -----             | -----              | -----             | 510  |
| SIMLO6_FRUIT        | -----              | -----              | -----             | -----              | -----             | 510  |
|                     |                    | 3,520              |                   | 3,540              |                   |      |
| gDNA_Solyc02g082430 | <b>GGTGATCCAA</b>  | <b>TACTCTGGTG</b>  | <b>GTACTAATGG</b> | <b>GAGGATGCAA</b>  | <b>AAAGCTATAT</b> | 3550 |
| cDNA_Solyc02g082430 | -----              | -----              | -----             | -----              | -----             | 833  |
| SIMLO6_LEAF         | -----              | -----              | -----             | -----              | -----             | 510  |
| SIMLO6_ROOT         | -----              | -----              | -----             | -----              | -----             | 510  |
| SIMLO6_FLOWER       | -----              | -----              | -----             | -----              | -----             | 510  |
| SIMLO6_FRUIT        | -----              | -----              | -----             | -----              | -----             | 510  |
|                     | 3,560              |                    | 3,580             |                    | 3,600             |      |
| gDNA_Solyc02g082430 | <b>GCTTTATGCT</b>  | <b>TCATTTTGG A</b> | <b>TTGTTTCTCT</b> | <b>ATCTTACTTG</b>  | <b>GTTGACACAT</b> | 3600 |
| cDNA_Solyc02g082430 | -----              | -----              | -----             | -----              | -----             | 833  |
| SIMLO6_LEAF         | -----              | -----              | -----             | -----              | -----             | 510  |
| SIMLO6_ROOT         | -----              | -----              | -----             | -----              | -----             | 510  |
| SIMLO6_FLOWER       | -----              | -----              | -----             | -----              | -----             | 510  |
| SIMLO6_FRUIT        | -----              | -----              | -----             | -----              | -----             | 510  |

|                     |                      |                      |                       |                    |                   |      |
|---------------------|----------------------|----------------------|-----------------------|--------------------|-------------------|------|
|                     |                      |                      | 3,620                 |                    | 3,640             |      |
| gDNA_Solyc02g082430 | <b>TCAAACAAGT</b>    | <b>TAGGAAACTA</b>    | <b>AGTTGCATGA</b>     | <b>CAAAC TGGTC</b> | <b>TTGGTATGAT</b> | 3650 |
| cDNA_Solyc02g082430 | -----                | -----                | -----                 | -----              | -----             | 833  |
| SIMLO6_LEAF         | -----                | -----                | -----                 | -----              | -----             | 510  |
| SIMLO6_ROOT         | -----                | -----                | -----                 | -----              | -----             | 510  |
| SIMLO6_FLOWER       | -----                | -----                | -----                 | -----              | -----             | 510  |
| SIMLO6_FRUIT        | -----                | -----                | -----                 | -----              | -----             | 510  |
|                     | 3,660                |                      | 3,680                 |                    | 3,700             |      |
| gDNA_Solyc02g082430 | <b>AGGAAGTGTT</b>    | <b>CAACTTCAA</b>     | <b>TAATTTTATG</b>     | <b>GCAGTTAAGT</b>  | <b>GTTGGATCAT</b> | 3700 |
| cDNA_Solyc02g082430 | -----                | -----                | -----                 | -----              | -----             | 833  |
| SIMLO6_LEAF         | -----                | -----                | -----                 | -----              | -----             | 510  |
| SIMLO6_ROOT         | -----                | -----                | -----                 | -----              | -----             | 510  |
| SIMLO6_FLOWER       | -----                | -----                | -----                 | -----              | -----             | 510  |
| SIMLO6_FRUIT        | -----                | -----                | -----                 | -----              | -----             | 510  |
|                     |                      | 3,720                |                       | 3,740              |                   |      |
| gDNA_Solyc02g082430 | <b>TCAAAC TGT</b>    | <b>TTCCCTAAA</b>     | <b>ATCGCTGCTG</b>     | <b>TTATACTCCT</b>  | <b>AGCTATAATT</b> | 3750 |
| cDNA_Solyc02g082430 | -----                | -----                | -----                 | -----              | -----             | 833  |
| SIMLO6_LEAF         | -----                | -----                | -----                 | -----              | -----             | 510  |
| SIMLO6_ROOT         | -----                | -----                | -----                 | -----              | -----             | 510  |
| SIMLO6_FLOWER       | -----                | -----                | -----                 | -----              | -----             | 510  |
| SIMLO6_FRUIT        | -----                | -----                | -----                 | -----              | -----             | 510  |
|                     | 3,760                |                      | 3,780                 |                    | 3,800             |      |
| gDNA_Solyc02g082430 | <b>GACTAGCTAC</b>    | <b>CAAGGCTCAA</b>    | <b>AATTGTTACT</b>     | <b>GGAATTTACC</b>  | <b>ACTTGTCTAG</b> | 3800 |
| cDNA_Solyc02g082430 | -----                | -----                | -----                 | -----              | -----             | 833  |
| SIMLO6_LEAF         | -----                | -----                | -----                 | -----              | -----             | 510  |
| SIMLO6_ROOT         | -----                | -----                | -----                 | -----              | -----             | 510  |
| SIMLO6_FLOWER       | -----                | -----                | -----                 | -----              | -----             | 510  |
| SIMLO6_FRUIT        | -----                | -----                | -----                 | -----              | -----             | 510  |
|                     |                      | 3,820                |                       | 3,840              |                   |      |
| gDNA_Solyc02g082430 | <b>AGTGATAAAC</b>    | <b>TATTAGGATG</b>    | <b>CTTTTATGGT</b>     | <b>ATTAATCCAT</b>  | <b>TTGCTAAATG</b> | 3850 |
| cDNA_Solyc02g082430 | -----                | -----                | -----                 | -----              | -----             | 833  |
| SIMLO6_LEAF         | -----                | -----                | -----                 | -----              | -----             | 510  |
| SIMLO6_ROOT         | -----                | -----                | -----                 | -----              | -----             | 510  |
| SIMLO6_FLOWER       | -----                | -----                | -----                 | -----              | -----             | 510  |
| SIMLO6_FRUIT        | -----                | -----                | -----                 | -----              | -----             | 510  |
|                     | 3,860                |                      | 3,880                 |                    | 3,900             |      |
| gDNA_Solyc02g082430 | <b>CCTGAAACTT</b>    | <b>TATTCTTCAG</b>    | <b>ATTCGTGGCT</b>     | <b>GGAAAGGTTG</b>  | <b>GGAGCAAGAG</b> | 3900 |
| cDNA_Solyc02g082430 | -----                | -----                | <b>ATTCG TGGC T</b>   | <b>GGAAAGG TTG</b> | <b>GGAGCAAGAG</b> | 863  |
| SIMLO6_LEAF         | -----                | -----                | <b>ATTCG TGGC T</b>   | <b>GGAAAGG TTG</b> | <b>GGAGCAAGAG</b> | 540  |
| SIMLO6_ROOT         | -----                | -----                | <b>ATTCG TGGC T</b>   | <b>GGAAAGG TTG</b> | <b>GGAGCAAGAG</b> | 540  |
| SIMLO6_FLOWER       | -----                | -----                | <b>ATTCG TGGC T</b>   | <b>GGAAAGG TTG</b> | <b>GGAGCAAGAG</b> | 540  |
| SIMLO6_FRUIT        | -----                | -----                | <b>ATTCG TGGC T</b>   | <b>GGAAAGG TTG</b> | <b>GGAGCAAGAG</b> | 540  |
|                     |                      | 3,920                |                       | 3,940              |                   |      |
| gDNA_Solyc02g082430 | <b>ACTTCAACCC</b>    | <b>ATAGTTACGA</b>    | <b>GTTTACAAAT</b>     | <b>GGTATAAATT</b>  | <b>TGCTTGCTGT</b> | 3950 |
| cDNA_Solyc02g082430 | <b>AC T T CAACCC</b> | <b>ATAG T T ACGA</b> | <b>G T T T ACAAAT</b> | <b>G</b>           | -----             | 894  |
| SIMLO6_LEAF         | <b>AC T T CAACCC</b> | <b>ATAG T T ACGA</b> | <b>G T T T ACAAAT</b> | <b>G</b>           | -----             | 571  |
| SIMLO6_ROOT         | <b>AC T T CAACCC</b> | <b>ATAG T T ACGA</b> | <b>G T T T ACAAAT</b> | <b>G</b>           | -----             | 571  |
| SIMLO6_FLOWER       | <b>ACTTCAACCC</b>    | <b>ATAGTTACGA</b>    | <b>GTTTACAAAT</b>     | <b>G</b>           | -----             | 571  |
| SIMLO6_FRUIT        | <b>AC T T CAACCC</b> | <b>ATAG T T ACGA</b> | <b>G T T T ACAAAT</b> | <b>G</b>           | -----             | 571  |
|                     | 3,960                |                      | 3,980                 |                    | 4,000             |      |
| gDNA_Solyc02g082430 | <b>AAAGCCAGAA</b>    | <b>CTTTGGATTG</b>    | <b>TTGCTTGCTC</b>     | <b>TCTGTTTATT</b>  | <b>TGCTCATTTG</b> | 4000 |
| cDNA_Solyc02g082430 | -----                | -----                | -----                 | -----              | -----             | 894  |
| SIMLO6_LEAF         | -----                | -----                | -----                 | -----              | -----             | 571  |
| SIMLO6_ROOT         | -----                | -----                | -----                 | -----              | -----             | 571  |
| SIMLO6_FLOWER       | -----                | -----                | -----                 | -----              | -----             | 571  |
| SIMLO6_FRUIT        | -----                | -----                | -----                 | -----              | -----             | 571  |
|                     |                      | 4,020                |                       | 4,040              |                   |      |
| gDNA_Solyc02g082430 | <b>GTTTTGACTC</b>    | <b>TCTCACTATG</b>    | <b>TTTCTAACTT</b>     | <b>GGGTCTTGCA</b>  | <b>GATCCTTCAA</b> | 4050 |
| cDNA_Solyc02g082430 | -----                | -----                | -----                 | -----              | <b>-ATCCTTCAA</b> | 903  |
| SIMLO6_LEAF         | -----                | -----                | -----                 | -----              | <b>-ATCCTTCAA</b> | 580  |
| SIMLO6_ROOT         | -----                | -----                | -----                 | -----              | <b>-ATCCTTCAA</b> | 580  |
| SIMLO6_FLOWER       | -----                | -----                | -----                 | -----              | <b>-ATCCTTCAA</b> | 580  |
| SIMLO6_FRUIT        | -----                | -----                | -----                 | -----              | <b>-ATCCTTCAA</b> | 580  |
|                     | 4,060                |                      | 4,080                 |                    | 4,100             |      |
| gDNA_Solyc02g082430 | <b>GATTTAGACT</b>    | <b>TACTCATGAG</b>    | <b>ACATCTTTTG</b>     | <b>TCCGAGCGCA</b>  | <b>TACTAGTTTC</b> | 4100 |
| cDNA_Solyc02g082430 | <b>GATTTAGACT</b>    | <b>TACTCATGAG</b>    | <b>ACATCTTTTG</b>     | <b>TCCGAGCGCA</b>  | <b>TACTAGTTTC</b> | 953  |
| SIMLO6_LEAF         | <b>GATTTAGACT</b>    | <b>TACTCATGAG</b>    | <b>ACATCTTTTG</b>     | <b>TCCGAGCGCA</b>  | <b>TACTAGTTTC</b> | 630  |
| SIMLO6_ROOT         | <b>GATTTAGACT</b>    | <b>TACTCATGAG</b>    | <b>ACATCTTTTG</b>     | <b>TCCGAGCGCA</b>  | <b>TACTAGTTTC</b> | 630  |
| SIMLO6_FLOWER       | <b>GATTTAGACT</b>    | <b>TACTCATGAG</b>    | <b>ACATCTTTTG</b>     | <b>TCCGAGCGCA</b>  | <b>TACTAGTTTC</b> | 630  |
| SIMLO6_FRUIT        | <b>GATTTAGACT</b>    | <b>TACTCATGAG</b>    | <b>ACATCTTTTG</b>     | <b>TCCGAGCGCA</b>  | <b>TACTAGTTTC</b> | 630  |
|                     |                      | 4,120                |                       | 4,140              |                   |      |
| gDNA_Solyc02g082430 | <b>TGGACAAGGA</b>    | <b>TCCCGATCTT</b>    | <b>CTTTTACATT</b>     | <b>GTGAGGAATT</b>  | <b>AATACAATGT</b> | 4150 |
| cDNA_Solyc02g082430 | <b>TGGACAAGGA</b>    | <b>TCCCGA TCTT</b>   | <b>CTTTTACA TT</b>    | <b>G</b>           | -----             | 984  |
| SIMLO6_LEAF         | <b>TGGACAAGGA</b>    | <b>TCCCGATCTT</b>    | <b>CTTT</b>           | <b>G</b>           | -----             | 655  |
| SIMLO6_ROOT         | <b>TGGACAAGGA</b>    | <b>TCCCGA TCTT</b>   | <b>CTTTTACA TT</b>    | <b>G</b>           | -----             | 661  |
| SIMLO6_FLOWER       | <b>TGGACAAGGA</b>    | <b>TCCCGA TCTT</b>   | <b>CTTTTACA TT</b>    | <b>G</b>           | -----             | 661  |
| SIMLO6_FRUIT        | <b>TGGACAAGGA</b>    | <b>TCCCGA TCTT</b>   | <b>CTTTTACA TT</b>    | <b>G</b>           | -----             | 661  |
|                     | 4,160                |                      | 4,180                 |                    | 4,200             |      |
| gDNA_Solyc02g082430 | <b>GCATTATAG</b>     | <b>TTTTGTACCA</b>    | <b>GAAGGT CAAA</b>    | <b>CTAGTGCTAA</b>  | <b>GGTGACTGAC</b> | 4200 |
| cDNA_Solyc02g082430 | -----                | -----                | -----                 | -----              | -----             | 984  |
| SIMLO6_LEAF         | -----                | -----                | -----                 | -----              | -----             | 655  |
| SIMLO6_ROOT         | -----                | -----                | -----                 | -----              | -----             | 661  |
| SIMLO6_FLOWER       | -----                | -----                | -----                 | -----              | -----             | 661  |
| SIMLO6_FRUIT        | -----                | -----                | -----                 | -----              | -----             | 661  |

|                     |                   |                   |                    |                   |                   |      |
|---------------------|-------------------|-------------------|--------------------|-------------------|-------------------|------|
|                     |                   |                   | 4,220              |                   | 4,240             |      |
| gDNA_Solyc02g082430 | <b>TGTCGAAAC</b>  | <b>TTACATCATG</b> | <b>CAGGGATGCT</b>  | <b>TCTTCAGACA</b> | <b>ATTTTTCAAG</b> | 4250 |
| cDNA_Solyc02g082430 | -----             | -----             | ----GATGCT         | TCTTCAGACA        | ATTTTTCAAG        | 1010 |
| SIMLO6_LEAF         | -----             | -----             | ----GATGCT         | TCTTCAGACA        | ATTTTTCAAG        | 681  |
| SIMLO6_ROOT         | -----             | -----             | ----GATGCT         | TCTTCAGACA        | ATTTTTCAAG        | 687  |
| SIMLO6_FLOWER       | -----             | -----             | ----GATGCT         | TCTTCAGACA        | ATTTTTCAAG        | 687  |
| SIMLO6_FRUIT        | -----             | -----             | ----GATGCT         | TCTTCAGACA        | ATTTTTCAAG        | 687  |
|                     | 4,260             |                   | 4,280              |                   | 4,300             |      |
| gDNA_Solyc02g082430 | <b>TCTGTCAGTA</b> | <b>AGTCAGACTA</b> | <b>CTTGGCTCTG</b>  | <b>CGCAATGGTT</b> | <b>TCATAAGTGT</b> | 4300 |
| cDNA_Solyc02g082430 | TCTGTCAGTA        | AGTCAGACTA        | CTTGGCTCTG         | CGCAATGGTT        | TCATAAGTGT        | 1060 |
| SIMLO6_LEAF         | TCTGTCAGTA        | AGTCAGACTA        | CTTGGCTCTG         | CGCAATGGTT        | TCATAAGTGT        | 731  |
| SIMLO6_ROOT         | TCTGTCAGTA        | AGTCAGACTA        | CTTGGCTCTG         | CGCAATGGTT        | TCATAAGTGT        | 737  |
| SIMLO6_FLOWER       | TCTGTCAGTA        | AGTCAGACTA        | CTTGGCTCTG         | CGCAATGGTT        | TCATAAGTGT        | 737  |
| SIMLO6_FRUIT        | TCTGTCAGTA        | AGTCAGACTA        | CTTGGCTCTG         | CGCAATGGTT        | TCATAAGTGT        | 737  |
|                     |                   | 4,320             |                    | 4,340             |                   |      |
| gDNA_Solyc02g082430 | <b>GAGTGTTTCA</b> | <b>TGTGATTGT</b>  | <b>TCTTCCTTGG</b>  | <b>TAATTCCTTG</b> | <b>TTACCCATGA</b> | 4350 |
| cDNA_Solyc02g082430 | -----             | -----             | -----              | -----             | -----             | 1060 |
| SIMLO6_LEAF         | -----             | -----             | -----              | -----             | -----             | 731  |
| SIMLO6_ROOT         | -----             | -----             | -----              | -----             | -----             | 737  |
| SIMLO6_FLOWER       | -----             | -----             | -----              | -----             | -----             | 737  |
| SIMLO6_FRUIT        | -----             | -----             | -----              | -----             | -----             | 737  |
|                     | 4,360             |                   | 4,380              |                   | 4,400             |      |
| gDNA_Solyc02g082430 | <b>AACTAAAATT</b> | <b>CCTCCTTTCG</b> | <b>CAGGTTTCATC</b> | <b>TGGCTCCTGG</b> | <b>AAGTAAATTT</b> | 4400 |
| cDNA_Solyc02g082430 | -----             | -----             | ----TCA TC         | TGGC TCC TGG      | AAG TAAA TTT      | 1085 |
| SIMLO6_LEAF         | -----             | -----             | ----GCATC          | TGGCTCCTGG        | AAGTAAATTT        | 756  |
| SIMLO6_ROOT         | -----             | -----             | ----TCA TC         | TGGC TCC TGG      | AAG TAAA TTT      | 762  |
| SIMLO6_FLOWER       | -----             | -----             | ----TCA TC         | TGGC TCC TGG      | AAG TAAA TTT      | 762  |
| SIMLO6_FRUIT        | -----             | -----             | ----TCA TC         | TGGC TCC TGG      | AAG TAAA TTT      | 762  |
|                     |                   | 4,420             |                    | 4,440             |                   |      |
| gDNA_Solyc02g082430 | <b>AACTTCCAAA</b> | <b>AGTACATCAA</b> | <b>GAGGTCATTA</b>  | <b>GAGGATGACT</b> | <b>TCAAGGTAGT</b> | 4450 |
| cDNA_Solyc02g082430 | AACTTCCAAA        | AGTACATCAA        | GAGGTCATTA         | GAGGATGACT        | TCAAGGTAGT        | 1135 |
| SIMLO6_LEAF         | AACTTCCAAA        | AGTACATCAA        | GAGGTCATTA         | GAGGATGACT        | TCAAGGTAGT        | 806  |
| SIMLO6_ROOT         | AACTTCCAAA        | AGTACATCAA        | GAGGACATTA         | GAGGATGACT        | TCAAGGTAGT        | 812  |
| SIMLO6_FLOWER       | AACTTCCAAA        | AGTACATCAA        | GAGGACATTA         | GAGGATGACT        | TCAAGGTAGT        | 812  |
| SIMLO6_FRUIT        | AACTTCCAAA        | AGTACATCAA        | GAGGACATTA         | GAGGATGACT        | TCAAGGTAGT        | 812  |
|                     | 4,460             |                   | 4,480              |                   | 4,500             |      |
| gDNA_Solyc02g082430 | <b>TGTCGGTGTG</b> | <b>AGGTAGCTAG</b> | <b>ATGCTCTATT</b>  | <b>TGCTCTCTCA</b> | <b>ATTTTTTCAG</b> | 4500 |
| cDNA_Solyc02g082430 | TGTCGGTGTG        | AG                | -----              | -----             | -----             | 1147 |
| SIMLO6_LEAF         | TGTCGGTGTG        | AG                | -----              | -----             | -----             | 818  |
| SIMLO6_ROOT         | TGTCGGTGTG        | AG                | -----              | -----             | -----             | 824  |
| SIMLO6_FLOWER       | TGTCGGTGTG        | AG                | -----              | -----             | -----             | 824  |
| SIMLO6_FRUIT        | TGTCGGTGTG        | AG                | -----              | -----             | -----             | 824  |
|                     |                   | 4,520             |                    | 4,540             |                   |      |
| gDNA_Solyc02g082430 | <b>CATATTTATG</b> | <b>TGTGCATATG</b> | <b>TGCCTAATTA</b>  | <b>CCATATATAT</b> | <b>CCTTGATCTC</b> | 4550 |
| cDNA_Solyc02g082430 | -----             | -----             | -----              | -----             | -----             | 1147 |
| SIMLO6_LEAF         | -----             | -----             | -----              | -----             | -----             | 818  |
| SIMLO6_ROOT         | -----             | -----             | -----              | -----             | -----             | 824  |
| SIMLO6_FLOWER       | -----             | -----             | -----              | -----             | -----             | 824  |
| SIMLO6_FRUIT        | -----             | -----             | -----              | -----             | -----             | 824  |
|                     | 4,560             |                   | 4,580              |                   | 4,600             |      |
| gDNA_Solyc02g082430 | <b>TGATTGGCTT</b> | <b>TTTACTTGTG</b> | <b>TTTTTTTTCC</b>  | <b>GGGCAGTCCA</b> | <b>GTTTTATGGG</b> | 4600 |
| cDNA_Solyc02g082430 | -----             | -----             | -----              | ----TCCA          | GTTTTATGGG        | 1161 |
| SIMLO6_LEAF         | -----             | -----             | -----              | ----CAGTCCA       | GTTTTATGGG        | 835  |
| SIMLO6_ROOT         | -----             | -----             | -----              | ----TCCA          | GTTTTATGGG        | 838  |
| SIMLO6_FLOWER       | -----             | -----             | -----              | ----TCCA          | GTTTTATGGG        | 838  |
| SIMLO6_FRUIT        | -----             | -----             | -----              | ----TCCA          | GTTTTATGGG        | 838  |
|                     |                   | 4,620             |                    | 4,640             |                   |      |
| gDNA_Solyc02g082430 | <b>CATCATTTGT</b> | <b>GCTTTTCTTG</b> | <b>CTTCTGAATG</b>  | <b>TTAGCGGTAA</b> | <b>GTTATGTTCT</b> | 4650 |
| cDNA_Solyc02g082430 | CATCATTTGT        | GC TTTTCTTG       | CTTCTGAATG         | TTAGCGG           | -----             | 1198 |
| SIMLO6_LEAF         | CATCATTTGT        | GC TTTTCTTG       | CTTCTGAATG         | TTAGCGG           | -----             | 872  |
| SIMLO6_ROOT         | CATCATTTGT        | GC TTTTCTTG       | CTTCTGAATG         | TTAGCGG           | -----             | 875  |
| SIMLO6_FLOWER       | CATCATTTGT        | GC TTTTCTTG       | CTTCTGAATG         | TTAGCGG           | -----             | 875  |
| SIMLO6_FRUIT        | CATCATTTGT        | GC TTTTCTTG       | CTTCTGAATG         | TTAGCGG           | -----             | 875  |
|                     | 4,660             |                   | 4,680              |                   | 4,700             |      |
| gDNA_Solyc02g082430 | <b>GAGGTCTGAT</b> | <b>CCATTTCTGG</b> | <b>AAATTGTTTA</b>  | <b>GTTCTTCCGT</b> | <b>TTTAGTCACC</b> | 4700 |
| cDNA_Solyc02g082430 | -----             | -----             | -----              | -----             | -----             | 1198 |
| SIMLO6_LEAF         | -----             | -----             | -----              | -----             | -----             | 872  |
| SIMLO6_ROOT         | -----             | -----             | -----              | -----             | -----             | 875  |
| SIMLO6_FLOWER       | -----             | -----             | -----              | -----             | -----             | 875  |
| SIMLO6_FRUIT        | -----             | -----             | -----              | -----             | -----             | 875  |
|                     |                   | 4,720             |                    | 4,740             |                   |      |
| gDNA_Solyc02g082430 | <b>ATCTACTACA</b> | <b>TGTTTTCATA</b> | <b>TATTCTGAAT</b>  | <b>TATTTGACCC</b> | <b>ATTGCAGGGT</b> | 4750 |
| cDNA_Solyc02g082430 | -----             | -----             | -----              | -----             | ----GT            | 1200 |
| SIMLO6_LEAF         | -----             | -----             | -----              | -----             | ----GT            | 874  |
| SIMLO6_ROOT         | -----             | -----             | -----              | -----             | ----GT            | 877  |
| SIMLO6_FLOWER       | -----             | -----             | -----              | -----             | ----GT            | 877  |
| SIMLO6_FRUIT        | -----             | -----             | -----              | -----             | ----GT            | 877  |
|                     | 4,760             |                   | 4,780              |                   | 4,800             |      |
| gDNA_Solyc02g082430 | <b>GGCAAGCATT</b> | <b>GTTCTGGGCA</b> | <b>TCCTTAATTC</b>  | <b>CTCTAATTGT</b> | <b>AAGATTCTTT</b> | 4800 |
| cDNA_Solyc02g082430 | GGCAAGCA          | TT GTTCTGGGCA     | TCCTTAATTC         | CTCTAATT          | -----             | 1238 |
| SIMLO6_LEAF         | GGCAAGCA          | TT GTTCTGGGCA     | TCCTTAATTC         | CTCTAATT          | -----             | 912  |
| SIMLO6_ROOT         | GGCAAGCA          | TT GTTCTGGGCA     | TCCTTAATTC         | CTCTAATT          | -----             | 915  |
| SIMLO6_FLOWER       | GGCAAGCA          | TT GTTCTGGGCA     | TCCTTAATTC         | CTCTAATT          | -----             | 915  |
| SIMLO6_FRUIT        | GGCAAGCA          | TT GTTCTGGGCA     | TCCTTAATTC         | CTCTAATT          | -----             | 915  |

|                     |                                                                      |       |  |       |       |
|---------------------|----------------------------------------------------------------------|-------|--|-------|-------|
|                     |                                                                      | 4,820 |  | 4,840 |       |
| gDNA_Solyc02g082430 | <b>TCCATTG TTC ATCTTCTGAA ACTACTTTAT GGGGAAATTC TAATTAATGA</b>       |       |  |       | 4850  |
| cDNA_Solyc02g082430 | -----                                                                |       |  |       | 1238  |
| SIMLO6_LEAF         | -----                                                                |       |  |       | 912   |
| SIMLO6_ROOT         | -----                                                                |       |  |       | 915   |
| SIMLO6_FLOWER       | -----                                                                |       |  |       | 915   |
| SIMLO6_FRUIT        | -----                                                                |       |  |       | 915   |
|                     |                                                                      | 4,860 |  | 4,880 | 4,900 |
| gDNA_Solyc02g082430 | <b>AATCTTCTCA GATCATT TTA GCTGTTGGAA CAAAGCTTCA AGCTGTTT T</b>       |       |  |       | 4900  |
| cDNA_Solyc02g082430 | ----- <b>-ATCA TTTTA GC TGT TGGAA CAAAGC T TCA AGCTGTTT T</b>        |       |  |       | 1277  |
| SIMLO6_LEAF         | ----- <b>-ATCA TTTTA GC TGT TGGAA CAAAGC T TCA AGCTGTTT T</b>        |       |  |       | 951   |
| SIMLO6_ROOT         | ----- <b>-ATCA TTTTA GC TGT TGGAA CAAAGC T TCA AGCTGTTT T</b>        |       |  |       | 954   |
| SIMLO6_FLOWER       | ----- <b>-ATCA TTTTA GC TGT TGGAA CAAAGC T TCA AGCTGTTT T</b>        |       |  |       | 954   |
| SIMLO6_FRUIT        | ----- <b>-ATCA TTTTA GC TGT TGGAA CAAAGC T TCA AGCTGTTT T</b>        |       |  |       | 954   |
|                     |                                                                      | 4,920 |  | 4,940 |       |
| gDNA_Solyc02g082430 | <b>ACTAGGA TGG CCCTTGACAT TAAAGAGAGA CATGCAGTAG TTCAAGGAAT</b>       |       |  |       | 4950  |
| cDNA_Solyc02g082430 | ----- <b>ACTAGGA TGG CCCTTGACAT TAAAGAGAGA CATGCAGTAG TTCAAGGAAT</b> |       |  |       | 1327  |
| SIMLO6_LEAF         | ----- <b>ACTAGGA TGG CCCTTGACAT TAAAGAGAGA CATGCAGTAG TTCAAGGAAT</b> |       |  |       | 1001  |
| SIMLO6_ROOT         | ----- <b>ACTAGGA TGG CCCTTGACAT TAAAGAGAGA CATGCAGTAG TTCAAGGAAT</b> |       |  |       | 1004  |
| SIMLO6_FLOWER       | ----- <b>ACTAGGA TGG CCCTTGACAT TAAAGAGAGA CATGCAGTAG TTCAAGGAAT</b> |       |  |       | 1004  |
| SIMLO6_FRUIT        | ----- <b>ACTAGGA TGG CCCTTGACAT TAAAGAGAGA CATGCAGTAG TTCAAGGAAT</b> |       |  |       | 1004  |
|                     |                                                                      | 4,960 |  | 4,980 | 5,000 |
| gDNA_Solyc02g082430 | <b>CCCTCTTGTA CAAGCCTCAG ACAAATATTT TTGGTTTGGT CGACCACGAC</b>        |       |  |       | 5000  |
| cDNA_Solyc02g082430 | ----- <b>CCCTCTTGTA CAAGCCTCAG ACAAATATTT TTGGTTTGGT CGACCACGAC</b>  |       |  |       | 1377  |
| SIMLO6_LEAF         | ----- <b>CCCTCTTGTA CAAGCCTCAG ACAAATATTT TTGGTTTGGT CGACCACGAC</b>  |       |  |       | 1051  |
| SIMLO6_ROOT         | ----- <b>CCCTCTTGTA CAAGCCTCAG ACAAATATTT TTGGTTTGGT CGACCACGAC</b>  |       |  |       | 1054  |
| SIMLO6_FLOWER       | ----- <b>CCCTCTTGTA CAAGCCTCAG ACAAATATTT TTGGTTTGGT CGACCACGAC</b>  |       |  |       | 1054  |
| SIMLO6_FRUIT        | ----- <b>CCCTCTTGTA CAAGCCTCAG ACAAATATTT TTGGTTTGGT CGACCACGAC</b>  |       |  |       | 1054  |
|                     |                                                                      | 5,020 |  | 5,040 |       |
| gDNA_Solyc02g082430 | <b>TGGTTCTTCA CCTCATT CAT TTTGCC TTGT TTCAGGTTTG CATTTC CAAT</b>     |       |  |       | 5050  |
| cDNA_Solyc02g082430 | ----- <b>TGGTTCTTCA CCTCATT CAT TTTGCC TTGT TTCAG -----</b>          |       |  |       | 1412  |
| SIMLO6_LEAF         | ----- <b>TGGTTCTTCA CCTCATT CAT TTTGCC TTGT TTCAG -----</b>          |       |  |       | 1086  |
| SIMLO6_ROOT         | ----- <b>TGGTTCTTCA CCTCATT CAT TTTGCC TTGT TTCAG -----</b>          |       |  |       | 1089  |
| SIMLO6_FLOWER       | ----- <b>TGGTTCTTCA CCTCATT CAT TTTGCC TTGT TTCAG -----</b>          |       |  |       | 1089  |
| SIMLO6_FRUIT        | ----- <b>TGGTTCTTCA CCTCATT CAT TTTGCC TTGT TTCAG -----</b>          |       |  |       | 1089  |
|                     |                                                                      | 5,060 |  | 5,080 | 5,100 |
| gDNA_Solyc02g082430 | <b>TTGCAGAATT TTAAGAAGT ATTATTAGTA AACCAGTCGT TTGGGCTCAA</b>         |       |  |       | 5100  |
| cDNA_Solyc02g082430 | -----                                                                |       |  |       | 1412  |
| SIMLO6_LEAF         | -----                                                                |       |  |       | 1086  |
| SIMLO6_ROOT         | -----                                                                |       |  |       | 1089  |
| SIMLO6_FLOWER       | -----                                                                |       |  |       | 1089  |
| SIMLO6_FRUIT        | -----                                                                |       |  |       | 1089  |
|                     |                                                                      | 5,120 |  | 5,140 |       |
| gDNA_Solyc02g082430 | <b>CTTTGCAAGT ACTATAGTTT CCATAAGACA AATCACAAAT ATGGTG CATG</b>       |       |  |       | 5150  |
| cDNA_Solyc02g082430 | -----                                                                |       |  |       | 1412  |
| SIMLO6_LEAF         | -----                                                                |       |  |       | 1086  |
| SIMLO6_ROOT         | -----                                                                |       |  |       | 1089  |
| SIMLO6_FLOWER       | -----                                                                |       |  |       | 1089  |
| SIMLO6_FRUIT        | -----                                                                |       |  |       | 1089  |
|                     |                                                                      | 5,160 |  | 5,180 | 5,200 |
| gDNA_Solyc02g082430 | <b>GAGTAGTTTG CTTTTCATAT CTATATATTC CTTGGCTAA ACTCTTTTT</b>          |       |  |       | 5200  |
| cDNA_Solyc02g082430 | -----                                                                |       |  |       | 1412  |
| SIMLO6_LEAF         | -----                                                                |       |  |       | 1086  |
| SIMLO6_ROOT         | -----                                                                |       |  |       | 1089  |
| SIMLO6_FLOWER       | -----                                                                |       |  |       | 1089  |
| SIMLO6_FRUIT        | -----                                                                |       |  |       | 1089  |
|                     |                                                                      | 5,220 |  | 5,240 |       |
| gDNA_Solyc02g082430 | <b>TGCAC TTATC AAAC TTTGCA GAATGCATTC CAGATAACAT ATTTTCTGTG</b>      |       |  |       | 5250  |
| cDNA_Solyc02g082430 | ----- <b>-AATGCA TTC CAGA TAACAT ATTTTCTGTG</b>                      |       |  |       | 1441  |
| SIMLO6_LEAF         | ----- <b>CA GAATGCA TTC CAGA TAACAT ATTTTCTGTG</b>                   |       |  |       | 1118  |
| SIMLO6_ROOT         | ----- <b>-AATGCA TTC CAGA TAACAT ATTTTCTGTG</b>                      |       |  |       | 1118  |
| SIMLO6_FLOWER       | ----- <b>-AATGCA TTC CAGA TAACAT ATTTTCTGTG</b>                      |       |  |       | 1118  |
| SIMLO6_FRUIT        | ----- <b>-AATGCA TTC CAGA TAACAT ATTTTCTGTG</b>                      |       |  |       | 1118  |
|                     |                                                                      | 5,260 |  | 5,280 | 5,300 |
| gDNA_Solyc02g082430 | <b>GATATGGTA ATAAC TCTTC TCCCTGTATC AAGATCAAAT TCTGATATTG</b>        |       |  |       | 5300  |
| cDNA_Solyc02g082430 | ----- <b>GATATGG -----</b>                                           |       |  |       | 1448  |
| SIMLO6_LEAF         | ----- <b>GATATGG -----</b>                                           |       |  |       | 1125  |
| SIMLO6_ROOT         | ----- <b>GATATGG -----</b>                                           |       |  |       | 1125  |
| SIMLO6_FLOWER       | ----- <b>GATATGG -----</b>                                           |       |  |       | 1125  |
| SIMLO6_FRUIT        | ----- <b>GATATGG -----</b>                                           |       |  |       | 1125  |
|                     |                                                                      | 5,320 |  | 5,340 |       |
| gDNA_Solyc02g082430 | <b>CAAGATATTC TTTTTCTTT TATTTAATGT CCATAAAACT ATGATAGAGA</b>         |       |  |       | 5350  |
| cDNA_Solyc02g082430 | -----                                                                |       |  |       | 1448  |
| SIMLO6_LEAF         | -----                                                                |       |  |       | 1125  |
| SIMLO6_ROOT         | -----                                                                |       |  |       | 1125  |
| SIMLO6_FLOWER       | -----                                                                |       |  |       | 1125  |
| SIMLO6_FRUIT        | -----                                                                |       |  |       | 1125  |
|                     |                                                                      | 5,360 |  | 5,380 | 5,400 |
| gDNA_Solyc02g082430 | <b>TGAGGATTCT ACTTTTTCTG TAGTATGAGT ATGGGCTAAA ATCTTGCTTC</b>        |       |  |       | 5400  |
| cDNA_Solyc02g082430 | ----- <b>---TATGAG T ATGGGCTAAA ATCTTGCTTC</b>                       |       |  |       | 1475  |
| SIMLO6_LEAF         | ----- <b>---TATGAG T ATGGGCTAAA ATCTTGCTTC</b>                       |       |  |       | 1152  |
| SIMLO6_ROOT         | ----- <b>---TATGAG T ATGGGCTAAA ATCTTGCTTC</b>                       |       |  |       | 1152  |
| SIMLO6_FLOWER       | ----- <b>---TATGAG T ATGGGCTAAA ATCTTGCTTC</b>                       |       |  |       | 1152  |
| SIMLO6_FRUIT        | ----- <b>---TATGAG T ATGGGCTAAA ATCTTGCTTC</b>                       |       |  |       | 1152  |

|                     |                                                                             |       |       |       |       |       |
|---------------------|-----------------------------------------------------------------------------|-------|-------|-------|-------|-------|
|                     |                                                                             |       | 5,420 |       | 5,440 |       |
| gDNA_Solyc02g082430 | <b>CACGAGGCGT T T GAGC TGG T CATTGCAAAA ATTGTTATAG GGTATGTTTC</b>           |       |       |       |       | 5450  |
| cDNA_Solyc02g082430 | <b>CACGAGGCG T T T GAGC T GG T CA TT GCAAAA A T T G T T A T A G G</b> ----- |       |       |       |       | 1516  |
| SIMLO6_LEAF         | <b>CACGAGGCG T T T GAGC T GG T CA TT GCAAAA A T T G T T A T A G G</b> ----- |       |       |       |       | 1193  |
| SIMLO6_ROOT         | <b>CACGAGGCG T T T GAGC T GG T CA TT GCAAAA A T T G T T A T A G G</b> ----- |       |       |       |       | 1193  |
| SIMLO6_FLOWER       | <b>CACGAGGCG T T T GAGC T GG T CA TT GCAAAA A T T G T T A T A G G</b> ----- |       |       |       |       | 1193  |
| SIMLO6_FRUIT        | <b>CACGAGGCG T T T GAGC TGG T CATTGCAAAA ATTGTTATAG G</b> -----             |       |       |       |       | 1193  |
|                     |                                                                             | 5,460 |       | 5,480 |       | 5,500 |
| gDNA_Solyc02g082430 | <b>GTGCTACAGA AACTCACTTT AAAATATCCA TTATCTTAGT TCCTAAGCTT</b>               |       |       |       |       | 5500  |
| cDNA_Solyc02g082430 | -----                                                                       |       |       |       |       | 1516  |
| SIMLO6_LEAF         | -----                                                                       |       |       |       |       | 1193  |
| SIMLO6_ROOT         | -----                                                                       |       |       |       |       | 1193  |
| SIMLO6_FLOWER       | -----                                                                       |       |       |       |       | 1193  |
| SIMLO6_FRUIT        | -----                                                                       |       |       |       |       | 1193  |
|                     |                                                                             | 5,520 |       | 5,540 |       |       |
| gDNA_Solyc02g082430 | <b>CACAATTTCA GCTTGCTCTC GCTAAATCAA TTTTTTTCAT TGTATTACAG</b>               |       |       |       |       | 5550  |
| cDNA_Solyc02g082430 | -----                                                                       |       |       |       |       | 1516  |
| SIMLO6_LEAF         | -----                                                                       |       |       |       |       | 1193  |
| SIMLO6_ROOT         | -----                                                                       |       |       |       |       | 1193  |
| SIMLO6_FLOWER       | -----                                                                       |       |       |       |       | 1193  |
| SIMLO6_FRUIT        | -----                                                                       |       |       |       |       | 1193  |
|                     |                                                                             | 5,560 |       | 5,580 |       | 5,600 |
| gDNA_Solyc02g082430 | <b>AGTGGGAGTC TTATTCCTAT GCAGTTATAT CACTCTTCCG CTTTATGCCC</b>               |       |       |       |       | 5600  |
| cDNA_Solyc02g082430 | <b>AGTGGGAGTC TTATTCCTAT GCAGTTATAT CACTCTTCCG CTTTATGCCC</b>               |       |       |       |       | 1566  |
| SIMLO6_LEAF         | <b>G</b> ----- <b>TTCC TAT GCAG TT AT AT CAC TCTTCCG CTTTATGCCC</b>         |       |       |       |       | 1231  |
| SIMLO6_ROOT         | <b>AGTGGGAGTC TTATTCCTAT GCAGTTATAT CACTCTTCCG CTTTATGCCC</b>               |       |       |       |       | 1243  |
| SIMLO6_FLOWER       | <b>AGTGGGAGTC TTATTCCTAT GCAGTTATAT CACTCTTCCG CTTTATGCCC</b>               |       |       |       |       | 1243  |
| SIMLO6_FRUIT        | <b>AGTGGGAGTC TTATTCCTAT ACAGTTATAT CACTCTTCCG CTTTATGCCC</b>               |       |       |       |       | 1243  |
|                     |                                                                             | 5,620 |       | 5,640 |       |       |
| gDNA_Solyc02g082430 | <b>TTATAACTCA GGTACTATCA TAGGCTCGTC TCTCAAACCA ATAGTATAAT</b>               |       |       |       |       | 5650  |
| cDNA_Solyc02g082430 | <b>TTATAACTCA G</b> -----                                                   |       |       |       |       | 1577  |
| SIMLO6_LEAF         | <b>TTATAACTCA G</b> -----                                                   |       |       |       |       | 1242  |
| SIMLO6_ROOT         | <b>TTATAACTCA G</b> -----                                                   |       |       |       |       | 1254  |
| SIMLO6_FLOWER       | <b>TTATAACTCA G</b> -----                                                   |       |       |       |       | 1254  |
| SIMLO6_FRUIT        | <b>TTATAACTCA G</b> -----                                                   |       |       |       |       | 1254  |
|                     |                                                                             | 5,660 |       | 5,680 |       | 5,700 |
| gDNA_Solyc02g082430 | <b>TGTATCTAGG TTTTATTTCG TGCCATATTA CCTTAGACAT TTGCTATTGC</b>               |       |       |       |       | 5700  |
| cDNA_Solyc02g082430 | -----                                                                       |       |       |       |       | 1577  |
| SIMLO6_LEAF         | -----                                                                       |       |       |       |       | 1242  |
| SIMLO6_ROOT         | -----                                                                       |       |       |       |       | 1254  |
| SIMLO6_FLOWER       | -----                                                                       |       |       |       |       | 1254  |
| SIMLO6_FRUIT        | -----                                                                       |       |       |       |       | 1254  |
|                     |                                                                             | 5,720 |       | 5,740 |       |       |
| gDNA_Solyc02g082430 | <b>TCACTTCGTT GAACAATGTA AGCTCACTAC ATAAACTAC TGAAATTTCT</b>                |       |       |       |       | 5750  |
| cDNA_Solyc02g082430 | -----                                                                       |       |       |       |       | 1577  |
| SIMLO6_LEAF         | -----                                                                       |       |       |       |       | 1242  |
| SIMLO6_ROOT         | -----                                                                       |       |       |       |       | 1254  |
| SIMLO6_FLOWER       | -----                                                                       |       |       |       |       | 1254  |
| SIMLO6_FRUIT        | -----                                                                       |       |       |       |       | 1254  |
|                     |                                                                             | 5,760 |       | 5,780 |       | 5,800 |
| gDNA_Solyc02g082430 | <b>AGCCTTTTTA GCATGATCTA TTGTTGTTAA GTTAGATAAA GCATTGGCCT</b>               |       |       |       |       | 5800  |
| cDNA_Solyc02g082430 | -----                                                                       |       |       |       |       | 1577  |
| SIMLO6_LEAF         | -----                                                                       |       |       |       |       | 1242  |
| SIMLO6_ROOT         | -----                                                                       |       |       |       |       | 1254  |
| SIMLO6_FLOWER       | -----                                                                       |       |       |       |       | 1254  |
| SIMLO6_FRUIT        | -----                                                                       |       |       |       |       | 1254  |
|                     |                                                                             | 5,820 |       | 5,840 |       |       |
| gDNA_Solyc02g082430 | <b>TTCTGCAGAT GGGATCCCAT ATGAAAAAAT CCATCTTTGA TGAGCAAACC</b>               |       |       |       |       | 5850  |
| cDNA_Solyc02g082430 | ----- <b>AT GGGATCCCA T ATGAAAAA T CCA TCTTTGA T GAGCAAACC</b>              |       |       |       |       | 1619  |
| SIMLO6_LEAF         | ----- <b>AT GGGATCCCA T ATGAAAAA T CCA TCTTTGA T GAGCAAACC</b>              |       |       |       |       | 1284  |
| SIMLO6_ROOT         | ----- <b>AT GGGATCCCA T ATGAAAAA T CCA TCTTTGA T GAGCAAACC</b>              |       |       |       |       | 1296  |
| SIMLO6_FLOWER       | ----- <b>AT GGGATCCCA T ATGAAAAA T CCA TCTTTGA T GAGCAAACC</b>              |       |       |       |       | 1296  |
| SIMLO6_FRUIT        | ----- <b>AT GGGATCCCA T ATGAAAAA T CCA TCTTTGA T GAGCAAACC</b>              |       |       |       |       | 1296  |
|                     |                                                                             | 5,860 |       | 5,880 |       | 5,900 |
| gDNA_Solyc02g082430 | <b>TCCAAGGCAC TAAAGAAGTG GCATATGGCT GTGAAGAAGC GGACAGGAGC</b>               |       |       |       |       | 5900  |
| cDNA_Solyc02g082430 | <b>TCCAAGGCAC TAAAGAAGTG GCATATGGCT GTGAAGAAGC GGACAGGAGC</b>               |       |       |       |       | 1669  |
| SIMLO6_LEAF         | <b>TCCAAGGCAC TAAAGAAGTG GCATATGGCT GTGAAGAAGC GGACAGGAGC</b>               |       |       |       |       | 1334  |
| SIMLO6_ROOT         | <b>TCCAAGGCAC TAAAGAAGTG GCATATGGCT GTGAAGAAGC GGACAGGAGC</b>               |       |       |       |       | 1346  |
| SIMLO6_FLOWER       | <b>TCCAAGGCAC TAAAGAAGTG GCATATGGCT GTGAAGAAGC GGACAGGAGC</b>               |       |       |       |       | 1346  |
| SIMLO6_FRUIT        | <b>TCCAAGGCAC TAAAGAAGTG GCATATGGCT GTGAAGAAGC GGACAGGAGC</b>               |       |       |       |       | 1346  |
|                     |                                                                             | 5,920 |       | 5,940 |       |       |
| gDNA_Solyc02g082430 | <b>GAGGGG TGAC AGG TCCCC TA CCCGAACAC T GGG T AA T GCA AGT CCAAGG T</b>     |       |       |       |       | 5950  |
| cDNA_Solyc02g082430 | <b>GAGGGG TGAC AGG TCCCC TA CCCGAACAC T GGG T AA T GCA AGT CCAAGG T</b>     |       |       |       |       | 1719  |
| SIMLO6_LEAF         | <b>GAGGGG TGAC AGG TCCCC TA CCCGAACAC T GGG T AA T GCA AGT CCAAGG T</b>     |       |       |       |       | 1384  |
| SIMLO6_ROOT         | <b>GAGGGG TGAC AGG TCCCC TA CCCGAACAC T GGG T AA T GCA AGT CCAAGG T</b>     |       |       |       |       | 1396  |
| SIMLO6_FLOWER       | <b>GAGGGG TGAC AGG TCCCC TA CCCGAACAC T GGG T AA T GCA AGT CCAAGG T</b>     |       |       |       |       | 1396  |
| SIMLO6_FRUIT        | <b>GAGGGG TGAC AGG TCCCC TA CCCGAACAC T GGG T AA T GCA AGT CCAAGG T</b>     |       |       |       |       | 1396  |
|                     |                                                                             | 5,960 |       | 5,980 |       | 6,000 |
| gDNA_Solyc02g082430 | <b>CTGCAA TGAG CTCACCTGTG CACCCATCAG GCCCTGGTCT TCATCGATAC</b>              |       |       |       |       | 6000  |
| cDNA_Solyc02g082430 | <b>CTGCAA TGAG CTCACCTGTG CACCCATCAG GCCCTGGTCT TCATCGATAC</b>              |       |       |       |       | 1769  |
| SIMLO6_LEAF         | <b>CTGCAA TGAG CTCACCTGTG CACCCATCAG GCCCTGGTCT TCATCGATAC</b>              |       |       |       |       | 1434  |
| SIMLO6_ROOT         | <b>CTGCAA TGAG CTCACCTGTG CACCCATCAG GCCCTGGTCT TCATCGATAC</b>              |       |       |       |       | 1446  |
| SIMLO6_FLOWER       | <b>CTGCAA TGAG CTCACCTGTG CACCCATCAG GCCCTGGTCT TCATCGATAC</b>              |       |       |       |       | 1446  |
| SIMLO6_FRUIT        | <b>CTGCAA TGAG CTCACCTGTG CACCCATCAG GCCCTGGTCT TCATCGATAC</b>              |       |       |       |       | 1446  |

|                     |             |              |              |              |             |      |
|---------------------|-------------|--------------|--------------|--------------|-------------|------|
|                     |             | 6,020        |              | 6,040        |             |      |
| gDNA_Solyc02g082430 | AAAACCAC TG | GTCAC TCA TC | GCG TTT CCAG | GGC TACAG TG | ATCAAGAAGC  | 6050 |
| cDNA_Solyc02g082430 | AAAACCAC TG | GTCAC TCA TC | GCG TTT CCAG | GGC TACAG TG | ATCAAGAAGC  | 1819 |
| SIMLO6_LEAF         | AAAACCAC TG | GTCAC TCA TC | GCG TTT CCAG | GGC TACAG TG | ATCAAGAAGC  | 1484 |
| SIMLO6_ROOT         | AAAACCAC TG | GTCAC TCA TC | GCG TTT CCAG | GGC TACAG TG | ATCAAGAAGC  | 1496 |
| SIMLO6_FLOWER       | AAAACCAC TG | GTCAC TCA TC | GCG TTT CCAG | GGC TACAG TG | ATCAAGAAGC  | 1496 |
| SIMLO6_FRUIT        | AAAACCAC TG | GTCAC TCA TC | GCG TTT CCAG | GGC TACAG TG | ATCAAGAAGC  | 1496 |
|                     |             | 6,060        |              | 6,080        | 6,100       |      |
| gDNA_Solyc02g082430 | ATCCGACCT T | GAAAA TGAT C | CAACAACACC   | GATGACTCGT   | GCAGAGATAG  | 6100 |
| cDNA_Solyc02g082430 | ATCCGACCT T | GAAAA TGAT C | CAACAACACC   | GATGACTCGT   | GCAGAGATAG  | 1869 |
| SIMLO6_LEAF         | ATCCGACCT T | GAAAA TGAT C | CAACAACACC   | GATGACTCGT   | GCAGAGATAG  | 1534 |
| SIMLO6_ROOT         | ATCCGACCT T | GAAAA TGAT C | CAACAACACC   | GATGACTCGT   | GCAGAGATAG  | 1546 |
| SIMLO6_FLOWER       | ATCCGACCT T | GAAAA TGAT C | CAACAACACC   | GATGACTCGT   | GCAGAGATAG  | 1546 |
| SIMLO6_FRUIT        | ATCCGACCT T | GAAAA TGAT C | CAACAACACC   | GATGACTCGT   | GCAGAGATAG  | 1546 |
|                     |             | 6,120        |              | 6,140        |             |      |
| gDNA_Solyc02g082430 | CAACTACACA  | TATTGATCAT   | GATGACACAG   | AAATTCATGT   | GCATATTCCCT | 6150 |
| cDNA_Solyc02g082430 | CAACTACACA  | TATTGATCAT   | GATGACACAG   | AAATTCATGT   | GCATATTCCCT | 1919 |
| SIMLO6_LEAF         | CAACTACACA  | TATTGATCAT   | GATGACACAG   | AAATTCATGT   | GCATATTCCCT | 1584 |
| SIMLO6_ROOT         | CAACTACACA  | TATTGATCAT   | GATGACACAG   | AAATTCATGT   | GCATATTCCCT | 1596 |
| SIMLO6_FLOWER       | CAACTACACA  | TATTGATCAT   | GATGACACAG   | AAATTCATGT   | GCATATTCCCT | 1596 |
| SIMLO6_FRUIT        | CAACTACACA  | TATTGATCAT   | GATGACACAG   | AAATTCATGT   | GCATATTCCCT | 1596 |
|                     |             | 6,160        |              | 6,180        | 6,200       |      |
| gDNA_Solyc02g082430 | CAAAA TGGAG | AA TCTACTAG  | GAATGAAGAT   | GACTTCTCAT   | TTGTGAAGCC  | 6200 |
| cDNA_Solyc02g082430 | CAAAA TGGAG | AA TCTACTAG  | GAATGAAGAT   | GACTTCTCAT   | TTGTGAAGCC  | 1969 |
| SIMLO6_LEAF         | CAAAA TGGAG | AA TCTACTAG  | GAATGAAGAT   | GACTTCTCAT   | TTGTGAAGCC  | 1634 |
| SIMLO6_ROOT         | CAAAA TGGAG | AA TCTACTAG  | GAATGAAGAT   | GACTTCTCAT   | TTGTGAAGCC  | 1646 |
| SIMLO6_FLOWER       | CAAAA TGGAG | AA TCTACTAG  | GAATGAAGAT   | GACTTCTCAT   | TTGTGAAGCC  | 1646 |
| SIMLO6_FRUIT        | CAAAA TGGAG | AA TCTACTAG  | GAATGAAGAT   | GACTTCTCAT   | TTGTGAAGCC  | 1646 |
|                     |             | 6,220        |              | 6,240        |             |      |
| gDNA_Solyc02g082430 | TGCTCCTCAA  | AGGTGAAAAG   | GAAGTAGGTA   | GCCAAC TTGT  | TACCTTTTTT  | 6250 |
| cDNA_Solyc02g082430 | TGCTCCTCAA  | AGGTGAAAAG   | GAAGTAGGTA   | GCCAAC TTGT  | TACCTTTTTT  | 2019 |
| SIMLO6_LEAF         | TGCTCCTCAA  | AGGTGA-----  | -----        | -----        | -----       | 1650 |
| SIMLO6_ROOT         | TGCTCCTCAA  | AGGTGA-----  | -----        | -----        | -----       | 1662 |
| SIMLO6_FLOWER       | TGCTCCTCAA  | AGGTGA-----  | -----        | -----        | -----       | 1662 |
| SIMLO6_FRUIT        | TGCTCCTCAA  | AGGTGA-----  | -----        | -----        | -----       | 1662 |
|                     |             | 6,260        |              | 6,280        | 6,300       |      |
| gDNA_Solyc02g082430 | TTTTTTTAA T | CTTTTTCCT T  | TTCCCTCAAG   | TCATATCAAT   | GTGCTTATAC  | 6300 |
| cDNA_Solyc02g082430 | TTTTTTTAA T | CTTTTTCCT T  | TTCCCTCAAG   | TCATATCAAT   | GTGCTTATAC  | 2069 |
| SIMLO6_LEAF         | -----       | -----        | -----        | -----        | -----       | 1650 |
| SIMLO6_ROOT         | -----       | -----        | -----        | -----        | -----       | 1662 |
| SIMLO6_FLOWER       | -----       | -----        | -----        | -----        | -----       | 1662 |
| SIMLO6_FRUIT        | -----       | -----        | -----        | -----        | -----       | 1662 |
|                     |             | 6,320        |              | 6,340        |             |      |
| gDNA_Solyc02g082430 | ATTTTAGGTA  | CATCATATAA   | GCAGTTTGGC   | ACATATAGGT   | GAATTCCTTG  | 6350 |
| cDNA_Solyc02g082430 | ATTTTAGGTA  | CATCATATAA   | GCAGTTTGGC   | ACATATAGGT   | GAATTCCTTG  | 2119 |
| SIMLO6_LEAF         | -----       | -----        | -----        | -----        | -----       | 1650 |
| SIMLO6_ROOT         | -----       | -----        | -----        | -----        | -----       | 1662 |
| SIMLO6_FLOWER       | -----       | -----        | -----        | -----        | -----       | 1662 |
| SIMLO6_FRUIT        | -----       | -----        | -----        | -----        | -----       | 1662 |
|                     |             | 6,360        |              | 6,380        |             |      |
| gDNA_Solyc02g082430 | TACTATATTT  | TTACTCTCTA   | ATTGTTTGGC   | TTAATAAG     | »6388       |      |
| cDNA_Solyc02g082430 | TACTATATTT  | TTACTCTCTA   | ATTGTTTGGC   | TTAATAAG     | »2157       |      |
| SIMLO6_LEAF         | -----       | -----        | -----        | -----        | »1650       |      |
| SIMLO6_ROOT         | -----       | -----        | -----        | -----        | »1662       |      |
| SIMLO6_FLOWER       | -----       | -----        | -----        | -----        | »1662       |      |
| SIMLO6_FRUIT        | -----       | -----        | -----        | -----        | »1662       |      |

```

gDNA_Solyc09g018830+Solyc09g018840 20 40
SIMLO7_FGENESH ATGAGTGGCG GAGAAGGAGA AGCAGAAGGG TCAACA TTGG AATTTACCCC 50
SIMLO7_LEAF ATGAGTGGCG GAGAAGGAGA AGCAGAAGGG TCAACA TTGG AATTTACCCC 50
SIMLO7_LEAF ATGAGTGGCG GAGAAGGAGA AGCAGAAGGG TCAACA TTGG AATTTACCCC 50
60 80 100
gDNA_Solyc09g018830+Solyc09g018840 TACTTGGGTG GTGGCCACCG TCTGCACCGT CATCGCTGCC ATTTCTCTTG 100
SIMLO7_FGENESH TACTTGGGTG GTGGCCACCG TCTGCACCGT CATCGCTGCC ATTTCTCTTG 100
SIMLO7_LEAF TACTTGGGTG GTGGCCACCG TCTGCACCGT CATCGCTGCC ATTTCTCTTG 100
120 140
gDNA_Solyc09g018830+Solyc09g018840 CCGTTGAGCG TCTCGTCCAT TATACTGGAA AGGTATGTAT ATAAATTATT 150
SIMLO7_FGENESH CCGTTGAGCG TCTCGTCCAT TATACTGGAA AG----- ----- 132
SIMLO7_LEAF CCGTTGAGCG TCTCGTCCAT TATACTGGAA AG----- ----- 132
160 180 200
gDNA_Solyc09g018830+Solyc09g018840 CTTTTTTTAA TTCAATTTCA TATTCAACTC ACATACTATC TCTTCACAGT 200
SIMLO7_FGENESH -----T 133
SIMLO7_LEAF -----T 133
220 240
gDNA_Solyc09g018830+Solyc09g018840 ATCTGAAGAA GAAGAATCAG AAGCCTTTAT ATGAAGCGCT ACAGAAAGTT 250
SIMLO7_FGENESH ATCTGAAGAA GAAGAATCAG AAGCCTTTAT ATGAAGCGCT ACAGAAAGTT 183
SIMLO7_LEAF ATCTGAAGAA GAAGAATCAG AAGCCTTTAT ATGAAGCGCT ACAGAAA --- 180
260 280 300
gDNA_Solyc09g018830+Solyc09g018840 AAAGAAGGTC CATACCAAGA TCTGTA AATT TTTAATTCTA GTTATAATTA 300
SIMLO7_FGENESH AAAGAAG --- ----- 190
SIMLO7_LEAF ----- 180
320 340
gDNA_Solyc09g018830+Solyc09g018840 ATTTGTAATG TTGAATATGC AGAGTTGATG CTTTGGGGT TTATATCCCT 350
SIMLO7_FGENESH -----AGTTGATG CTTTGGGGT TTATATCCCT 218
SIMLO7_LEAF -----AGTTGATG CTTTGGGGT TTATATCCCT 208
360 380 400
gDNA_Solyc09g018830+Solyc09g018840 TTTACTGACG GTTCTTCAAA GTAGCATAAT CAAGATTGT GTGCCTAACC 400
SIMLO7_FGENESH TTTACTGACG GTTCTTCAAA GTAGCATAAT CAAGATTGT GTGCCTAACC 268
SIMLO7_LEAF TTTACTGACG GTTCTTCAAA GTAGCATAAT CAAGATTGT GTGCCTAACC 258
420 440
gDNA_Solyc09g018830+Solyc09g018840 ATGTGGTCTT GCACCTTGCTA CTTGTTTCAT TATCTCATGA GTCACAACAT 450
SIMLO7_FGENESH ATGTGGTCTT GCACCTTGCTA CTTGTTTCAT TATCTCATGA GTCACAACAT 318
SIMLO7_LEAF ATGTGGTCTT GCACCTTGCTA CTTGTTTCAT TATCTCATGA GTCACAACAT 308
460 480 500
gDNA_Solyc09g018830+Solyc09g018840 CTTGCGCGTC TGTTAGCTGA AGAAGAAGCA GTTGTGGCG ATTGCATTGC 500
SIMLO7_FGENESH CTTGCGCGTC TGTTAGCTGA AGAAGAAGCA GTTGTGGCG ATTGCATTGC 368
SIMLO7_LEAF CTTGCGCGTC TGTTAGCTGA AGAAGAAGCA GTTGTGGCG ATTGCATTGC 358
520 540
gDNA_Solyc09g018830+Solyc09g018840 TAAAGTAATC AATTTGTTTT ACTTGAATTA TTTTCTTAAG TATCCTGACT 550
SIMLO7_FGENESH TAAA----- 372
SIMLO7_LEAF TAAA----- 362
560 580 600
gDNA_Solyc09g018830+Solyc09g018840 CTTGAGTTGA ATTCCAGTAT CTCATTCTCG TCATTTTTCG TTAGTTAGAT 600
SIMLO7_FGENESH ----- 372
SIMLO7_LEAF ----- 362
620 640
gDNA_Solyc09g018830+Solyc09g018840 TACTCTACTT CACTACATAC TGACTTCTAA TATCATTATT CCTTTTTTTT 650
SIMLO7_FGENESH ----- 372
SIMLO7_LEAF ----- 362
660 680 700
gDNA_Solyc09g018830+Solyc09g018840 TTGTTTCAGC ATAAGGTACC ATTACTCTCT CTTGAAGCCT TGCATCACCT 700
SIMLO7_FGENESH -----C ATAAGGTACC ATTACTCTCT CTTGAAGCCT TGCATCACCT 413
SIMLO7_LEAF -----C ATAAGGTACC ATTACTCTCT CTTGAAGCCT TGCATCACCT 403
720 740
gDNA_Solyc09g018830+Solyc09g018840 TCACATTTTC ATCTTTGTCC TTGCAATTGT TCACGTGACT TTCTCTCTTC 750
SIMLO7_FGENESH TCACATTTTC ATCTTTGTCC TTGCAATTGT TCACGTGACT TTCTCTCTTC 463
SIMLO7_LEAF TCACATTTTC ATCTTTGTCC TTGCAATTGT TCACGTGACT TTCTCTCTTC 453
760 780 800
gDNA_Solyc09g018830+Solyc09g018840 TGACTATTGT ATTTGGAGGA GCCAAGGCTCT CTACTTTATT AACTTGTTC 800
SIMLO7_FGENESH TGACTATTGT ATTTGGAGGA GCCAAG----- 489
SIMLO7_LEAF TGACTATTGT ATTTGGAGGA GCCAAG----- 479
820 840
gDNA_Solyc09g018830+Solyc09g018840 TCGTTTCTTC TCTTCAACTT TGTTTGTGTG TTGAATTGAG TGTTTGTAA 850
SIMLO7_FGENESH ----- 489
SIMLO7_LEAF ----- 479
860 880 900
gDNA_Solyc09g018830+Solyc09g018840 TTACTGATGG TTCAGATACG TCAACGGAAG CACTGTGAGG ACAGTATTGC 900
SIMLO7_FGENESH -----ATACG TCAACGGAAG CACTGTGAGG ACAGTATTGC 524
SIMLO7_LEAF -----ATACG TCAACGGAAG CACTGTGAGG ACAGTATTGC 514
920 940
gDNA_Solyc09g018830+Solyc09g018840 AAAAGCTAAT TATGAGACTG CACAAGGTAT GTATGATTGA TTACCTGTGA 950
SIMLO7_FGENESH AAAAGCTAAT TATGAGACTG CACAAG----- 550
SIMLO7_LEAF AAAAGCTAAT TATGAGACTG CACAAG----- 540
960 980 1,000
gDNA_Solyc09g018830+Solyc09g018840 GGTCCTTTTAT CAAACTCTTT GATCCATATC GCCAAAAAAA CAGATATAAT 1000
SIMLO7_FGENESH ----- 550
SIMLO7_LEAF ----- 540

```



|                                    |            |             |             |             |            |      |
|------------------------------------|------------|-------------|-------------|-------------|------------|------|
| gDNA_Solyc09g018830+Solyc09g018840 | TTGATTTATT | TTCTCTATAA  | GGAGCTTAAT  | TTTACATGAT  | AATTGGAGCC | 1050 |
| SIMLO7_FGENESH                     | -----      | -----       | -----       | -----       | -----      | 550  |
| SIMLO7_LEAF                        | -----      | -----       | -----       | -----       | -----      | 540  |
|                                    | 1,060      |             | 1,080       |             | 1,100      |      |
| gDNA_Solyc09g018830+Solyc09g018840 | GCTTAACACT | GTTCTAAAATG | ACGATTAGCA  | AAGAAGAAAT  | AAAGTAAATG | 1100 |
| SIMLO7_FGENESH                     | -----      | -----       | -----       | -----       | -----      | 550  |
| SIMLO7_LEAF                        | -----      | -----       | -----       | -----       | -----      | 540  |
|                                    | 1,120      |             | 1,140       |             |            |      |
| gDNA_Solyc09g018830+Solyc09g018840 | ACCTAATGAA | AAGCTTATGT  | GGAAAAC TTT | AATTTTACAT  | AACAATTGGG | 1150 |
| SIMLO7_FGENESH                     | -----      | -----       | -----       | -----       | -----      | 550  |
| SIMLO7_LEAF                        | -----      | -----       | -----       | -----       | -----      | 540  |
|                                    | 1,160      |             | 1,180       |             | 1,200      |      |
| gDNA_Solyc09g018830+Solyc09g018840 | AACCGCTTTA | CACGGTTCGA  | AATGATAATA  | ATCAAAGATG  | AAAGAAATTA | 1200 |
| SIMLO7_FGENESH                     | -----      | -----       | -----       | -----       | -----      | 550  |
| SIMLO7_LEAF                        | -----      | -----       | -----       | -----       | -----      | 540  |
|                                    | 1,220      |             | 1,240       |             |            |      |
| gDNA_Solyc09g018830+Solyc09g018840 | AATGGCCGAT | ATAAAAGTTT  | ATGTCGTCCC  | TGTAGTTAAT  | GTGCTCCCTA | 1250 |
| SIMLO7_FGENESH                     | -----      | -----       | -----       | -----       | -----      | 550  |
| SIMLO7_LEAF                        | -----      | -----       | -----       | -----       | -----      | 540  |
|                                    | 1,260      |             | 1,280       |             | 1,300      |      |
| gDNA_Solyc09g018830+Solyc09g018840 | TAAACTAGT  | TACTATCTTA  | ACCAAGTCTT  | TAAGGTAGTG  | AACTGTTCTC | 1300 |
| SIMLO7_FGENESH                     | -----      | -----       | -----       | -----       | -----      | 550  |
| SIMLO7_LEAF                        | -----      | -----       | -----       | -----       | -----      | 540  |
|                                    | 1,320      |             | 1,340       |             |            |      |
| gDNA_Solyc09g018830+Solyc09g018840 | ATACTGCAAC | CAATGAGAGG  | AAAGATAAGT  | AAGAAGCAAT  | ATGGAGTTAC | 1350 |
| SIMLO7_FGENESH                     | -----      | -----       | -----       | -----       | -----      | 550  |
| SIMLO7_LEAF                        | -----      | -----       | -----       | -----       | -----      | 540  |
|                                    | 1,360      |             | 1,380       |             | 1,400      |      |
| gDNA_Solyc09g018830+Solyc09g018840 | TCCCCTCATG | CATTATATCT  | AGATCAAGCT  | GATCTTAAAA  | CTAAAATAGT | 1400 |
| SIMLO7_FGENESH                     | -----      | -----       | -----       | -----       | -----      | 550  |
| SIMLO7_LEAF                        | -----      | -----       | -----       | -----       | -----      | 540  |
|                                    | 1,420      |             | 1,440       |             |            |      |
| gDNA_Solyc09g018830+Solyc09g018840 | TTGATGCTTT | CTTTTGCAGT  | TTTAAAACCA  | CGGGTTACAC  | ATGTCCAGCA | 1450 |
| SIMLO7_FGENESH                     | -----      | -----       | -----       | -----       | -----      | 581  |
| SIMLO7_LEAF                        | -----      | -----       | -----       | -----       | -----      | 571  |
|                                    | 1,460      |             | 1,480       |             | 1,500      |      |
| gDNA_Solyc09g018830+Solyc09g018840 | ACACGATTTT | ATCAGGGATC  | GATTTGTGGG  | TATGGGCAAA  | TGCTCAGCCA | 1500 |
| SIMLO7_FGENESH                     | -----      | -----       | -----       | -----       | -----      | 631  |
| SIMLO7_LEAF                        | -----      | -----       | -----       | -----       | -----      | 621  |
|                                    | 1,520      |             | 1,540       |             |            |      |
| gDNA_Solyc09g018830+Solyc09g018840 | TTTTTGGTTG | GTTGGTAAGC  | AGTTTCTTTC  | CTCAATAAGC  | AATCATTCTT | 1550 |
| SIMLO7_FGENESH                     | -----      | -----       | -----       | -----       | -----      | 644  |
| SIMLO7_LEAF                        | -----      | -----       | -----       | -----       | -----      | 634  |
|                                    | 1,560      |             | 1,580       |             | 1,600      |      |
| gDNA_Solyc09g018830+Solyc09g018840 | TCCCATCAT  | ATATTTCTCC  | TATGTATGGT  | AAAAC TTACC | TTGGGAACTG | 1600 |
| SIMLO7_FGENESH                     | -----      | -----       | -----       | -----       | -----      | 644  |
| SIMLO7_LEAF                        | -----      | -----       | -----       | -----       | -----      | 634  |
|                                    | 1,620      |             | 1,640       |             |            |      |
| gDNA_Solyc09g018830+Solyc09g018840 | CTCTTACAAC | ACATTTATGT  | GGAAAGAAAA  | GAAAGATCAT  | TAAATTTAAG | 1650 |
| SIMLO7_FGENESH                     | -----      | -----       | -----       | -----       | -----      | 644  |
| SIMLO7_LEAF                        | -----      | -----       | -----       | -----       | -----      | 634  |
|                                    | 1,660      |             | 1,680       |             | 1,700      |      |
| gDNA_Solyc09g018830+Solyc09g018840 | CTATTAAGA  | TGGGAAGGT   | GCATACGCTT  | TCAAATGACA  | GGGGAATATG | 1700 |
| SIMLO7_FGENESH                     | -----      | -----       | -----       | -----       | -----      | 644  |
| SIMLO7_LEAF                        | -----      | -----       | -----       | -----       | -----      | 634  |
|                                    | 1,720      |             | 1,740       |             |            |      |
| gDNA_Solyc09g018830+Solyc09g018840 | TGATGGACAT | ATATGATCAC  | TTTCTTTTAT  | CCGTTTATGT  | TGTGAGAAAG | 1750 |
| SIMLO7_FGENESH                     | -----      | -----       | -----       | -----       | -----      | 644  |
| SIMLO7_LEAF                        | -----      | -----       | -----       | -----       | -----      | 634  |
|                                    | 1,760      |             | 1,780       |             | 1,800      |      |
| gDNA_Solyc09g018830+Solyc09g018840 | GCAAATGTTG | GATCCTGTCT  | CCAGTAACTC  | CATCATATAT  | CTAGTTTATG | 1800 |
| SIMLO7_FGENESH                     | -----      | -----       | -----       | -----       | -----      | 644  |
| SIMLO7_LEAF                        | -----      | -----       | -----       | -----       | -----      | 634  |
|                                    | 1,820      |             | 1,840       |             |            |      |
| gDNA_Solyc09g018830+Solyc09g018840 | TAATATATGG | TTCACTACTT  | AAGTGC GTTG | AAAGAATTTA  | TATTATTAGC | 1850 |
| SIMLO7_FGENESH                     | -----      | -----       | -----       | -----       | -----      | 644  |
| SIMLO7_LEAF                        | -----      | -----       | -----       | -----       | -----      | 634  |
|                                    | 1,860      |             | 1,880       |             | 1,900      |      |
| gDNA_Solyc09g018830+Solyc09g018840 | AAGTTTTATT | TACTGTTGTG  | TTAGGGCCCT  | GTTACCTGAG  | AATTCTATAC | 1900 |
| SIMLO7_FGENESH                     | -----      | -----       | -----       | -----       | -----      | 644  |
| SIMLO7_LEAF                        | -----      | -----       | -----       | -----       | -----      | 634  |
|                                    | 1,920      |             | 1,940       |             |            |      |
| gDNA_Solyc09g018830+Solyc09g018840 | AAGCAAGTAC | TAGTTCTTAT  | TCTCAACAAA  | TATGATAAGT  | TGGCACTAAC | 1950 |
| SIMLO7_FGENESH                     | -----      | -----       | -----       | -----       | -----      | 644  |
| SIMLO7_LEAF                        | -----      | -----       | -----       | -----       | -----      | 634  |
|                                    | 1,960      |             | 1,980       |             | 2,000      |      |
| gDNA_Solyc09g018830+Solyc09g018840 | AAAAATTTGA | AAAACATGCT  | GAACAAACAT  | CAATTTATTT  | ATGAGTAAGA | 2000 |
| SIMLO7_FGENESH                     | -----      | -----       | -----       | -----       | -----      | 644  |
| SIMLO7_LEAF                        | -----      | -----       | -----       | -----       | -----      | 634  |

```

                2,020                2,040
gDNA_Solyc09g018830+Solyc09g018840  CAGAAAA TGT  AGAAATGGGG  AATTTATAGT  AGAGTAATCA  CGTGGTTTTA  2050
SIMLO7_FGENESH                      .....
SIMLO7_LEAF                          .....
                2,060                2,080                2,100
gDNA_Solyc09g018830+Solyc09g018840  TAGTGCCTTT  ACATTAACAT  AAGCATCTCA  TACTTTTTATT  TGGTTTTCCAC  2100
SIMLO7_FGENESH                      .....
SIMLO7_LEAF                          .....
                2,120                2,140
gDNA_Solyc09g018830+Solyc09g018840  AAAACTTGCA  GCACTCTTTC  TTTAAGCAAT  TTTATGGTTC  TGTGAGCAAG  2150
SIMLO7_FGENESH                      .....
SIMLO7_LEAF                          .....
                2,160                2,180                2,200
gDNA_Solyc09g018830+Solyc09g018840  TTAGATTATG  CTACTCTGTG  TTTGGGGTTC  ATTATGGTAA  CTTCACTACG  2200
SIMLO7_FGENESH                      TTAGATTATG  CTACTCTGTG  TTTGGGGTTC  ATTATG-----  720
SIMLO7_LEAF                          .....
                2,220                2,240
gDNA_Solyc09g018830+Solyc09g018840  TTAAGTTGCT  GAGATAATTG  TTTAGTGTTC  TCCCATCTTT  AGGTGTTTAA  2250
SIMLO7_FGENESH                      .....
SIMLO7_LEAF                          .....
                2,260                2,280                2,300
gDNA_Solyc09g018830+Solyc09g018840  TTGCTCATT  AGTATTAAGT  TTCTTCTCT  TGGCAGACAC  ATTGCAAACA  2300
SIMLO7_FGENESH                      .....
SIMLO7_LEAF                          .....
                2,320                2,340
gDNA_Solyc09g018830+Solyc09g018840  AAACCCAAA  TTTAATTTTC  ACAAGTACAT  GATTCGTGCT  CTGGAAGATG  2350
SIMLO7_FGENESH                      AAACCCAAA  TTTAATTTTC  ACAAGTACAT  GATTCGTGCT  CTGGAAGATG  784
SIMLO7_LEAF                          AAACCCAAA  TTTAATTTTC  ACAAGTACAT  GATTCGTGCT  CTGGAAGATG  699
                2,360                2,380                2,400
gDNA_Solyc09g018830+Solyc09g018840  ATTTTAAGAC  TGTCGTTGGT  ATCAGGTTAG  TGTCCATTCT  CCTTACCTCC  2400
SIMLO7_FGENESH                      ATTTTAAGAC  TGTCGTTGGT  ATCAG-----  .....
SIMLO7_LEAF                          ATTTTAAGAC  TGTCGTTGGT  ATCAG-----  .....
                2,420                2,440
gDNA_Solyc09g018830+Solyc09g018840  TCTGCCACAT  CCGAGATTTC  TCTATGAGAA  ATATGAATCG  GAGTTTGAAG  2450
SIMLO7_FGENESH                      .....
SIMLO7_LEAF                          .....
                2,460                2,480                2,500
gDNA_Solyc09g018830+Solyc09g018840  AAGGTGAGGG  ATAAGGAGCC  CATCCCACCG  GGAAGAATTT  GCGGTGTTTT  2500
SIMLO7_FGENESH                      .....
SIMLO7_LEAF                          .....
                2,520                2,540
gDNA_Solyc09g018830+Solyc09g018840  TCTTACTTGT  TGCCATTTTC  CTGTGTTTT  TTTTGCAGTT  AGTATCTCTG  2550
SIMLO7_FGENESH                      .....
SIMLO7_LEAF                          .....
                2,560                2,580                2,600
gDNA_Solyc09g018830+Solyc09g018840  GGTATTTGTT  GTCCTCTTCT  TGTTTCTGAA  TGTTAATGGT  ATGCCAACTC  2600
SIMLO7_FGENESH                      .....
SIMLO7_LEAF                          .....
                2,620                2,640
gDNA_Solyc09g018830+Solyc09g018840  AAAC TTGGAA  TAGTCATTT  TACCTTGCAG  CTGCTTTGAA  ATGTTTCAAT  2650
SIMLO7_FGENESH                      .....
SIMLO7_LEAF                          .....
                2,660                2,680                2,700
gDNA_Solyc09g018830+Solyc09g018840  GGTATACTTA  TGCAGAACAA  ATGAAAAAGG  GTTGTCTTGG  CAAGTAATAA  2700
SIMLO7_FGENESH                      .....
SIMLO7_LEAF                          .....
                2,720                2,740
gDNA_Solyc09g018830+Solyc09g018840  TTGGCTACCA  GCAATCTTAG  TGTTGTACAT  GCTATAGTTG  TAATTTGATA  2750
SIMLO7_FGENESH                      AC-----  -----  TTCTGATT  GCGG TTGGCA  CGAAG TTGGA  866
SIMLO7_LEAF                      TC-----  -----  TTCTGATT  GCGG TTGGCA  CGAAG TTGGA  844
                2,760                2,780                2,800
gDNA_Solyc09g018830+Solyc09g018840  ACATCTCCTT  ATGCATCCCC  AAGTTATGAT  TCAATAAAGC  CACGTGTTAG  2800
SIMLO7_FGENESH                      GCATGTAATT  ATACAGTT -  AGCTCATGAG  GTAGCAGAGA  AACA TGTGCG  914
SIMLO7_LEAF                      GCATGTAATT  ATACAGTT -  AGCTCATGAG  GTAGCAGAGA  AACA TGTGCG  892
                2,820                2,840
gDNA_Solyc09g018830+Solyc09g018840  AATTCT -GTT  GGTTTTGTGT  TACTATTTTC  ATTTTTCAGC  ACTCTTTTAG  2849
SIMLO7_FGENESH                      GATAGAAGG T  GAA TTGGTGG  TCCAACC TTC  T-----  -----G  946
SIMLO7_LEAF                      GATAGAAGG T  GAA TTGGTGG  TCCAACC TTC  T-----  -----G  924
                2,860                2,880                2,900
gDNA_Solyc09g018830+Solyc09g018840  ATGATTTATT  CAGACAC TGC  TTTTAAACAGT  GTTTCCTGCA  TAACTTTCAC  2899
SIMLO7_FGENESH                      ATGATCACTT  C-----  .....
SIMLO7_LEAF                      ATGATCACTT  C-----  .....
                2,920                2,940
gDNA_Solyc09g018830+Solyc09g018840  TTGGCTTTGA  TATTTACAA  GTTTCATTGA  TTTTTCAGTT  TGGTCATTTG  2949
SIMLO7_FGENESH                      -TGG TT CAAG  CGCC TCAA  TTGTCC TTG T CTT-----  .....
SIMLO7_LEAF                      -TGG TT CAAG  CGCC TCAA  TTGTCC TTG T CTT-----  .....
                2,960                2,980                3,000
gDNA_Solyc09g018830+Solyc09g018840  GTAGTGGTTT  ATATATGAAA  GCTGATTAAT  TCATTTTATA  CTCTCCAGGT  2999
SIMLO7_FGENESH                      .....
SIMLO7_LEAF                      .....

```

```

                                3,020                                3,040
gDNA_Solyc09g018830+Solyc09g018840 TGGCATACAT ACTTCTG-GA TTGCGTTCAT TCCTTTTGTG GTGAGTTGTA 3048
SIMLO7_FGENESH -----AAAT GCTTTTGAGA TAGCATTTCTT TTTTCAGGAT ATTGG----- 1049
SIMLO7_LEAF -----AAAT GCTTTTGAGA TAGCATTCTT TTTTCAGGAT ATTGGTCAA 1032
                                3,060                                3,080                                3,100
gDNA_Solyc09g018830+Solyc09g018840 TCTTTACTAA GCCTTCTGCT AGATCTAATT CAAATTTTAA GAATAGCCAT 3098
SIMLO7_FGENESH --------------- 1049
SIMLO7_LEAF TATGGGTTTG ATTCTTGCAT AATGGGACAA GTTGGTTTCA TTGTTCCACG 1082
                                3,120                                3,140
gDNA_Solyc09g018830+Solyc09g018840 TCAAACAAA CAATCACTCC CTCTGTCCA GTTTATGTA CACACTTTTT 3148
SIMLO7_FGENESH ------------------CACG TTGC 1057
SIMLO7_LEAF ACTTGTATA GGGTAATAA TTCAAGTGT ATGAAGCTAT AGCACGTTGC 1132
                                3,160                                3,180                                3,200
gDNA_Solyc09g018830+Solyc09g018840 CTGTTTAGTT TGTCGCCAA AAAATG--A CACGTTTCTT TATTTGTCAA 3195
SIMLO7_FGENESH CAC TTTATGC TCTTTGTTACA CAGATGGGTA CCA TTTC----- 1095
SIMLO7_LEAF CAC TTTATGC TCTTTGTTACA CAGATGGGTA CCA TTTC----- 1170
                                3,220                                3,240
gDNA_Solyc09g018830+Solyc09g018840 ATGTTTAGTG GCAGAATCAA TATTTAACT ATGTTGATC CCACCTATTT 3245
SIMLO7_FGENESH -----AAGAAG TCAA TATTTGAT-------GAGC CCA TTC----- 1124
SIMLO7_LEAF -----AAGAAG TCAA TATTTGAT-------GAGC CCA TTC----- 1199
                                3,260                                3,280                                3,300
gDNA_Solyc09g018830+Solyc09g018840 AGTAAAAAG AAAGTCCACA AAAGTGACC ATTCTATTTA AAAGTCAATT 3295
SIMLO7_FGENESH -----AG TTGGTCTTCT TGGTTGGGC-----TTTG AAAGCGA----- 1156
SIMLO7_LEAF -----AG TTGGTCTTCT TGGTTGGGC-----TTTG AAAGCGA----- 1231
                                3,320                                3,340
gDNA_Solyc09g018830+Solyc09g018840 AA TTTAAGGG TAGCCTGGAG CATTCTAGA TTCCTATCAA CTTTCTCATG 3345
SIMLO7_FGENESH AAATGAAGAG GGGACTCAAG--------------- 1176
SIMLO7_LEAF AAATGAAGAG GGGACTCAAG--------------- 1251
                                3,360                                3,380                                3,400
gDNA_Solyc09g018830+Solyc09g018840 AGTTAAGATG CATGTTGAAT GTGGGTGTTT CCTTCTCAC ACATTC AATT 3395
SIMLO7_FGENESH -GCTGCTACA GATGCTGGAA CT------------------TCAACT 1203
SIMLO7_LEAF -GCTGCTACA GATGCTGGAA CT------------------TCAACT 1278
                                3,420                                3,440
gDNA_Solyc09g018830+Solyc09g018840 ACTTTTCTTT CTTAATTACT CTTAATATTT TTTTAAACA CGAGGCTCCT 3445
SIMLO7_FGENESH --------------------------GAGGGTTCT 1212
SIMLO7_LEAF --------------------------GAGGGTTCT 1287
                                3,460                                3,480                                3,500
gDNA_Solyc09g018830+Solyc09g018840 TTAGCAACAA CCTCATCTTC TTCCACTTAA ACTTCTTTT TTTTGGTTTA 3495
SIMLO7_FGENESH ACAGTAA------------------------- 1219
SIMLO7_LEAF ACAGTAA------------------------- 1294
                                3,520                                3,540
gDNA_Solyc09g018830+Solyc09g018840 TATCAGCTTC TGATTGCGGT TGGCACAAG TTGGAGCATG TAATTATACA 3545
SIMLO7_FGENESH ------GATTACAGA TGTC----------G CAATCAACCA 1244
SIMLO7_LEAF ------GATTACAGA TGTC----------G CAATCAACCA 1319
                                3,560                                3,580                                3,600
gDNA_Solyc09g018830+Solyc09g018840 GTTAGCTCAT GAGGTAGCAG AGAAACATGT CGCGATAGAA GGTGAATTGG 3595
SIMLO7_FGENESH G-----AA GGAAACAA--------------- 1255
SIMLO7_LEAF G-----AA GGAA -CAC--------------- 1329
                                3,620                                3,640
gDNA_Solyc09g018830+Solyc09g018840 TGGTCCAACC TTCTGATGAT CACTTCTGGT TCAAGCGCCC TCAAATTGTC 3645
SIMLO7_FGENESH -----CCCA TCT TAA TTGGGAA CACAA TTATA ATCAAC----- 1288
SIMLO7_LEAF -----CCCATCT--------------- 1336
                                3,660
gDNA_Solyc09g018830+Solyc09g018840 CTTGTCTTGA TACAC 3660
SIMLO7_FGENESH -----TATAG 1293
SIMLO7_LEAF -----AA 1338

```

|                     |                      |                    |                       |                     |                     |      |
|---------------------|----------------------|--------------------|-----------------------|---------------------|---------------------|------|
| gDNA_Solyc11g069220 | <b>A T GGC</b> GGGAG | <b>GAGG</b> AGGAGG | <b>AAGA T CG TT G</b> | <b>GAGCAA</b> ACGC  | <b>CGACG T GGGC</b> | 50   |
| cDNA_Solyc11g069220 | <b>A T GGC</b> GGGAG | <b>GAGG</b> AGGAGG | <b>AAGA T CG TT G</b> | <b>GAGCAA</b> ACGC  | <b>CGACG T GGGC</b> | 50   |
| SIMLO8_LEAF         | <b>A T GGC</b> GGGAG | <b>GAGG</b> AGGAGG | <b>AAGA T CG TT G</b> | <b>GAGCAA</b> ACGC  | <b>CGACG T GGGC</b> | 50   |
|                     | 60                   | 80                 | 100                   |                     |                     |      |
| gDNA_Solyc11g069220 | <b>GGTTG</b> CCCTA   | <b>GTTTGT</b> TTTG | <b>CATTG</b> GTTGC    | <b>CATTTCC</b> ATT  | <b>GTAATAG</b> AGC  | 100  |
| cDNA_Solyc11g069220 | <b>GGTTG</b> CCCTA   | <b>GTTTGT</b> TTTG | <b>CATTG</b> GTTGC    | <b>CATTTCC</b> ATT  | <b>GTAATAG</b> AGC  | 100  |
| SIMLO8_LEAF         | <b>GGTTG</b> CCCTA   | <b>GTTTGT</b> TTTG | <b>CATTG</b> GTTGC    | <b>CATTTCC</b> ATT  | <b>GTAATAG</b> AGC  | 100  |
|                     | 120                  | 140                |                       |                     |                     |      |
| gDNA_Solyc11g069220 | <b>TCATCAT</b> CCA   | <b>TCTTATT</b> GGC | <b>AAGGT</b> AGGCC    | <b>ACTAAC</b> CATG  | <b>CAATAT</b> TTTG  | 150  |
| cDNA_Solyc11g069220 | <b>TCATCAT</b> CCA   | <b>TCTTATT</b> GGC | <b>AAG</b> -----      | <b>-----</b> ACATG  | <b>-----</b> TTTG   | 123  |
| SIMLO8_LEAF         | <b>TCATCAT</b> CCA   | <b>TCTTATT</b> GGC | <b>AAG</b> -----      | <b>-----</b> ACATG  | <b>-----</b> TTTG   | 123  |
|                     | 160                  | 180                | 200                   |                     |                     |      |
| gDNA_Solyc11g069220 | <b>ATAGAG</b> TTTA   | <b>AGTTATA</b> TAT | <b>ATATATA</b> CGT    | <b>ATTATT</b> TATA  | <b>TTATGT</b> TATA  | 200  |
| cDNA_Solyc11g069220 | -----                | -----              | -----                 | -----               | -----               | 123  |
| SIMLO8_LEAF         | -----                | -----              | -----                 | -----               | -----               | 123  |
|                     | 220                  | 240                |                       |                     |                     |      |
| gDNA_Solyc11g069220 | <b>TTCAA</b> AAGAT   | <b>ATCTACT</b> AAG | <b>TCTGAT</b> CATT    | <b>GAATTAT</b> GAG  | <b>ATTTATA</b> AATT | 250  |
| cDNA_Solyc11g069220 | -----                | -----              | -----                 | -----               | -----               | 123  |
| SIMLO8_LEAF         | -----                | -----              | -----                 | -----               | -----               | 123  |
|                     | 260                  | 280                | 300                   |                     |                     |      |
| gDNA_Solyc11g069220 | <b>TTATA</b> ATTAA   | <b>TATAT</b> TTTAC | <b>TTGTT</b> CCAAC    | <b>AAGTGA</b> ACAT  | <b>GTCTG</b> TTTAT  | 300  |
| cDNA_Solyc11g069220 | -----                | -----              | -----                 | -----               | -----               | 123  |
| SIMLO8_LEAF         | -----                | -----              | -----                 | -----               | -----               | 123  |
|                     | 320                  | 340                |                       |                     |                     |      |
| gDNA_Solyc11g069220 | <b>ATAA</b> AAAAATT  | <b>CTTAC</b> ACTAA | <b>AAAGG</b> TAAAA    | <b>AGTAT</b> TTTATA | <b>TAATT</b> GGGTC  | 350  |
| cDNA_Solyc11g069220 | -----                | -----              | -----                 | -----               | -----               | 123  |
| SIMLO8_LEAF         | -----                | -----              | -----                 | -----               | -----               | 123  |
|                     | 360                  | 380                | 400                   |                     |                     |      |
| gDNA_Solyc11g069220 | <b>ATAA</b> ATTCAT   | <b>GAAT</b> ATTTAT | <b>AGTGT</b> ACGAT    | <b>ATAAC</b> ATAGA  | <b>TATAT</b> TTCAA  | 400  |
| cDNA_Solyc11g069220 | -----                | -----              | -----                 | -----               | -----               | 123  |
| SIMLO8_LEAF         | -----                | -----              | -----                 | -----               | -----               | 123  |
|                     | 420                  | 440                |                       |                     |                     |      |
| gDNA_Solyc11g069220 | <b>TAAAT</b> TCACA   | <b>AATATA</b> ATTT | <b>TATCAT</b> TAAAT   | <b>ATTCT</b> TTTGC  | <b>CCTTG</b> CATGT  | 450  |
| cDNA_Solyc11g069220 | -----                | -----              | -----                 | -----               | -----               | 123  |
| SIMLO8_LEAF         | -----                | -----              | -----                 | -----               | -----               | 123  |
|                     | 460                  | 480                | 500                   |                     |                     |      |
| gDNA_Solyc11g069220 | <b>ATAG</b> TGGTTG   | <b>AAGTCT</b> AAAC | <b>ATAAA</b> AGAGC    | <b>ATTAT</b> ATGAA  | <b>GCACT</b> TGAGA  | 500  |
| cDNA_Solyc11g069220 | ---TGTTG             | <b>AAGTCT</b> AAAC | <b>ATAAA</b> AGAGC    | <b>ATTAT</b> ATGAA  | <b>GCACT</b> TGAGA  | 169  |
| SIMLO8_LEAF         | ---TGTTG             | <b>AAGTCT</b> AAAC | <b>ATAAA</b> AGAGC    | <b>ATTAT</b> ATGAA  | <b>GCACT</b> TGAGA  | 169  |
|                     | 520                  | 540                |                       |                     |                     |      |
| gDNA_Solyc11g069220 | <b>AGAT</b> AAAAGC   | <b>AGGTAC</b> ACTT | <b>TAAAT</b> TCGTA    | <b>TTATT</b> CGGAT  | <b>CTTTC</b> AAATA  | 550  |
| cDNA_Solyc11g069220 | <b>AGATA</b> AAAAGC  | <b>AG</b> -----    | -----                 | -----               | -----               | 181  |
| SIMLO8_LEAF         | <b>AGATA</b> AAAAGC  | <b>AG</b> -----    | -----                 | -----               | -----               | 181  |
|                     | 560                  | 580                | 600                   |                     |                     |      |
| gDNA_Solyc11g069220 | <b>TATTG</b> TTGTT   | <b>GTTGT</b> TCTGT | <b>TATTAT</b> CTGA    | <b>TTCTT</b> CATAA  | <b>TTATA</b> TAACT  | 600  |
| cDNA_Solyc11g069220 | -----                | -----              | -----                 | -----               | -----               | 181  |
| SIMLO8_LEAF         | -----                | -----              | -----                 | -----               | -----               | 181  |
|                     | 620                  | 640                |                       |                     |                     |      |
| gDNA_Solyc11g069220 | <b>TTTGA</b> AGGAT   | <b>TGATC</b> TGATC | <b>AATATA</b> CACC    | <b>AAATG</b> ATATT  | <b>TTTATA</b> AATAC | 650  |
| cDNA_Solyc11g069220 | -----                | -----              | -----                 | -----               | -----               | 181  |
| SIMLO8_LEAF         | -----                | -----              | -----                 | -----               | -----               | 181  |
|                     | 660                  | 680                | 700                   |                     |                     |      |
| gDNA_Solyc11g069220 | <b>ACTTT</b> AAATT   | <b>CATAT</b> TATCC | <b>GGACC</b> TTTCA    | <b>AATAT</b> ATTGT  | <b>CGTTG</b> TTATT  | 700  |
| cDNA_Solyc11g069220 | -----                | -----              | -----                 | -----               | -----               | 181  |
| SIMLO8_LEAF         | -----                | -----              | -----                 | -----               | -----               | 181  |
|                     | 720                  | 740                |                       |                     |                     |      |
| gDNA_Solyc11g069220 | <b>CTGTT</b> ATTAT   | <b>TTGAT</b> TCTTC | <b>ATAAT</b> TATAT    | <b>AACTT</b> TTGAA  | <b>GGATT</b> GATCT  | 750  |
| cDNA_Solyc11g069220 | -----                | -----              | -----                 | -----               | -----               | 181  |
| SIMLO8_LEAF         | -----                | -----              | -----                 | -----               | -----               | 181  |
|                     | 760                  | 780                | 800                   |                     |                     |      |
| gDNA_Solyc11g069220 | <b>GATCA</b> ATATA   | <b>CACTAA</b> TGA  | <b>TATTT</b> TTGTA    | <b>ATACA</b> TTTTA  | <b>AATTC</b> ATATT  | 800  |
| cDNA_Solyc11g069220 | -----                | -----              | -----                 | -----               | -----               | 181  |
| SIMLO8_LEAF         | -----                | -----              | -----                 | -----               | -----               | 181  |
|                     | 820                  | 840                |                       |                     |                     |      |
| gDNA_Solyc11g069220 | <b>GTTCG</b> AATCT   | <b>TTCAA</b> ATATA | <b>TTGTC</b> ATTTT    | <b>TGTTCT</b> GTTA  | <b>TTATC</b> TGATT  | 850  |
| cDNA_Solyc11g069220 | -----                | -----              | -----                 | -----               | -----               | 181  |
| SIMLO8_LEAF         | -----                | -----              | -----                 | -----               | -----               | 181  |
|                     | 860                  | 880                | 900                   |                     |                     |      |
| gDNA_Solyc11g069220 | <b>CTTC</b> AATAAT   | <b>TACATA</b> ACTT | <b>TTGA</b> AGGATT    | <b>GGTCT</b> GATCA  | <b>ACATA</b> CACTG  | 900  |
| cDNA_Solyc11g069220 | -----                | -----              | -----                 | -----               | -----               | 181  |
| SIMLO8_LEAF         | -----                | -----              | -----                 | -----               | -----               | 181  |
|                     | 920                  | 940                |                       |                     |                     |      |
| gDNA_Solyc11g069220 | <b>CAACG</b> ATATT   | <b>TTTGT</b> AGAAT | <b>TTGA</b> ACAACA    | <b>TACAT</b> ATACT  | <b>CGTTA</b> ATTTT  | 950  |
| cDNA_Solyc11g069220 | -----                | -----              | -----                 | -----               | -----               | 181  |
| SIMLO8_LEAF         | -----                | -----              | -----                 | -----               | -----               | 181  |
|                     | 960                  | 980                | 1,000                 |                     |                     |      |
| gDNA_Solyc11g069220 | <b>CTAAC</b> GAACA   | <b>TATTT</b> TATT  | <b>TATTT</b> CACT     | <b>AATAT</b> TTTAT  | <b>TTTTA</b> ATTTT  | 1000 |
| cDNA_Solyc11g069220 | -----                | -----              | -----                 | -----               | -----               | 181  |
| SIMLO8_LEAF         | -----                | -----              | -----                 | -----               | -----               | 181  |

|                     |                     |                     |                    |                     |                    |      |
|---------------------|---------------------|---------------------|--------------------|---------------------|--------------------|------|
|                     |                     | 1,020               |                    | 1,040               |                    |      |
| gDNA_Solyc11g069220 | <b>TTTTATAGAG</b>   | <b>TTAATGTTGT</b>   | <b>TGGGATTTAT</b>  | <b>ATCCTTACTA</b>   | <b>TTAACAGTAG</b>  | 1050 |
| cDNA_Solyc11g069220 | -----               | -----               | -----              | -----               | -----TAG           | 184  |
| SIMLO8_LEAF         | -----AG             | <b>TTAATGTTGT</b>   | <b>TGGGATTTAT</b>  | <b>ATCCTTACTA</b>   | <b>TTAACAGTAG</b>  | 223  |
|                     | 1,060               |                     | 1,080              |                     | 1,100              |      |
| gDNA_Solyc11g069220 | <b>GGCAAGA TCC</b>  | <b>AA TTT CAAAT</b> | <b>ATTTGTGTAT</b>  | <b>CTGAAAAAT</b>    | <b>TGCAAG TACG</b> | 1100 |
| cDNA_Solyc11g069220 | <b>GGCAAGA TCC</b>  | <b>AA TTT CAAAT</b> | <b>ATTTGTGTAT</b>  | <b>CTGAAAAAT</b>    | <b>TGCAAG TACG</b> | 234  |
| SIMLO8_LEAF         | <b>GGCAAGATCC</b>   | <b>AA TTT CAAAT</b> | <b>ATTTGTGTAT</b>  | <b>CTGAAAAAT</b>    | <b>TGCAAG TACG</b> | 273  |
|                     | 1,120               |                     | 1,140              |                     |                    |      |
| gDNA_Solyc11g069220 | <b>TGGCATCCAT</b>   | <b>GTAGTAAACA</b>   | <b>AAAAGAAGCT</b>  | <b>GAAATGAACA</b>   | <b>AATATATTTT</b>  | 1150 |
| cDNA_Solyc11g069220 | <b>TGGCATCCAT</b>   | <b>GTAGTAAACA</b>   | <b>AAAAGAAGCT</b>  | <b>GAAATGAACA</b>   | <b>AATATATTTT</b>  | 284  |
| SIMLO8_LEAF         | <b>TGGCATCCAT</b>   | <b>GTAGTAAACA</b>   | <b>AAAAGAAGCT</b>  | <b>GAAATGAACA</b>   | <b>AATATATTTT</b>  | 323  |
|                     | 1,160               |                     | 1,180              |                     | 1,200              |      |
| gDNA_Solyc11g069220 | <b>CGGT GAC TTA</b> | <b>GAGGGT CATC</b>  | <b>GCCGGCGAC T</b> | <b>TTT CACGGC T</b> | <b>GACGA TGGCG</b> | 1200 |
| cDNA_Solyc11g069220 | <b>CGGT GAC TTA</b> | <b>GAGGGT CATC</b>  | <b>GCCGGCGAC T</b> | <b>TTT CACGGC T</b> | <b>GACGA TGGCG</b> | 334  |
| SIMLO8_LEAF         | <b>CGGTGAC TTA</b>  | <b>GAGGGT CATC</b>  | <b>GCCGGCGAC T</b> | <b>TTT CACGGC T</b> | <b>GACGA TGGCG</b> | 373  |
|                     | 1,220               |                     | 1,240              |                     |                    |      |
| gDNA_Solyc11g069220 | <b>GAGT CCGGCG</b>  | <b>AG TTTT GGCG</b> | <b>GCTGCCGGAA</b>  | <b>CTGACAAA TG</b>  | <b>TGCAGACAAG</b>  | 1250 |
| cDNA_Solyc11g069220 | <b>GAGT CCGGCG</b>  | <b>AG TTTT GGCG</b> | <b>GCTGCCGGAA</b>  | <b>CTGACAAA TG</b>  | <b>TGCAGACAAG</b>  | 384  |
| SIMLO8_LEAF         | <b>GAGTCCGGCG</b>   | <b>AG TTTT GGCG</b> | <b>GCTGCCGGAA</b>  | <b>CTGACAAA TG</b>  | <b>TGCAGACAAG</b>  | 423  |
|                     | 1,260               |                     | 1,280              |                     | 1,300              |      |
| gDNA_Solyc11g069220 | <b>GCATGTTATT</b>   | <b>CGTATTTTATT</b>  | <b>ATTTTTTTCT</b>  | <b>TAATAAAAA</b>    | <b>GATAGTTAAT</b>  | 1300 |
| cDNA_Solyc11g069220 | <b>G</b> -----      | -----               | -----              | -----               | -----              | 385  |
| SIMLO8_LEAF         | <b>G</b> -----      | -----               | -----              | -----               | -----              | 424  |
|                     | 1,320               |                     | 1,340              |                     |                    |      |
| gDNA_Solyc11g069220 | <b>ATTAACGAA</b>    | <b>GAAAA TGTTA</b>  | <b>TATATACTCT</b>  | <b>AGAATAATAA</b>   | <b>AATATATTTA</b>  | 1350 |
| cDNA_Solyc11g069220 | -----               | -----               | -----              | -----               | -----              | 385  |
| SIMLO8_LEAF         | -----               | -----               | -----              | -----               | -----              | 424  |
|                     | 1,360               |                     | 1,380              |                     | 1,400              |      |
| gDNA_Solyc11g069220 | <b>TATATTTTAT</b>   | <b>AAGTAAATAA</b>   | <b>CATACTATAC</b>  | <b>TGTAATAA</b>     | <b>AAAAACTT</b>    | 1400 |
| cDNA_Solyc11g069220 | -----               | -----               | -----              | -----               | -----              | 385  |
| SIMLO8_LEAF         | -----               | -----               | -----              | -----               | -----              | 424  |
|                     | 1,420               |                     | 1,440              |                     |                    |      |
| gDNA_Solyc11g069220 | <b>ATAAGCTAAT</b>   | <b>TTGATCGACT</b>   | <b>TAAAATTAGC</b>  | <b>CAAAACGCAC</b>   | <b>GTTAACTTTA</b>  | 1450 |
| cDNA_Solyc11g069220 | -----               | -----               | -----              | -----               | -----              | 385  |
| SIMLO8_LEAF         | -----               | -----               | -----              | -----               | -----              | 424  |
|                     | 1,460               |                     | 1,480              |                     | 1,500              |      |
| gDNA_Solyc11g069220 | <b>TAAGTCAATG</b>   | <b>CCAATGCTTA</b>   | <b>TAAATCAAAA</b>  | <b>TATGTCAAAA</b>   | <b>GTCATAACTT</b>  | 1500 |
| cDNA_Solyc11g069220 | -----               | -----               | -----              | -----               | -----              | 385  |
| SIMLO8_LEAF         | -----               | -----               | -----              | -----               | -----              | 424  |
|                     | 1,520               |                     | 1,540              |                     |                    |      |
| gDNA_Solyc11g069220 | <b>AGTTATTACT</b>   | <b>TATATATTAC</b>   | <b>TCCTAATTAA</b>  | <b>TTTAAGCCTA</b>   | <b>TAGTATTAAG</b>  | 1550 |
| cDNA_Solyc11g069220 | -----               | -----               | -----              | -----               | -----              | 385  |
| SIMLO8_LEAF         | -----               | -----               | -----              | -----               | -----              | 424  |
|                     | 1,560               |                     | 1,580              |                     | 1,600              |      |
| gDNA_Solyc11g069220 | <b>TATTTTAAAGT</b>  | <b>TTGACTATTT</b>   | <b>TTATTTTATT</b>  | <b>ACTTTATCCT</b>   | <b>TATTTATTTG</b>  | 1600 |
| cDNA_Solyc11g069220 | -----               | -----               | -----              | -----               | -----              | 385  |
| SIMLO8_LEAF         | -----               | -----               | -----              | -----               | -----              | 424  |
|                     | 1,620               |                     | 1,640              |                     |                    |      |
| gDNA_Solyc11g069220 | <b>AAATATTTTT</b>   | <b>AGCTAAACAA</b>   | <b>AAATCTTAAC</b>  | <b>TTTCTCTTCT</b>   | <b>TTTGTATATA</b>  | 1650 |
| cDNA_Solyc11g069220 | -----               | -----               | -----              | -----               | -----              | 385  |
| SIMLO8_LEAF         | -----               | -----               | -----              | -----               | -----              | 424  |
|                     | 1,660               |                     | 1,680              |                     | 1,700              |      |
| gDNA_Solyc11g069220 | <b>TGTTTTTTGT</b>   | <b>TTTTTCTAAA</b>   | <b>ATAAATAATA</b>  | <b>AAAAAATAAA</b>   | <b>ATTACCAGTT</b>  | 1700 |
| cDNA_Solyc11g069220 | -----               | -----               | -----              | -----               | -----              | 385  |
| SIMLO8_LEAF         | -----               | -----               | -----              | -----               | -----              | 424  |
|                     | 1,720               |                     | 1,740              |                     |                    |      |
| gDNA_Solyc11g069220 | <b>TAACATAATG</b>   | <b>ATAAATTGAT</b>   | <b>ACTTTTAAAT</b>  | <b>TTATCAAGAT</b>   | <b>TTTTTCTTAA</b>  | 1750 |
| cDNA_Solyc11g069220 | -----               | -----               | -----              | -----               | -----              | 385  |
| SIMLO8_LEAF         | -----               | -----               | -----              | -----               | -----              | 424  |
|                     | 1,760               |                     | 1,780              |                     | 1,800              |      |
| gDNA_Solyc11g069220 | <b>CAACATGCCC</b>   | <b>AATTGTTTCA</b>   | <b>ATTTATTTAT</b>  | <b>AAAATTAATT</b>   | <b>TCAACGCTTG</b>  | 1800 |
| cDNA_Solyc11g069220 | -----               | -----               | -----              | -----               | -----              | 385  |
| SIMLO8_LEAF         | -----               | -----               | -----              | -----               | -----              | 424  |
|                     | 1,820               |                     | 1,840              |                     |                    |      |
| gDNA_Solyc11g069220 | <b>GATATATTTT</b>   | <b>TTTATATTTA</b>   | <b>AATTTATCAA</b>  | <b>CTATTTACGA</b>   | <b>TCATCTAATC</b>  | 1850 |
| cDNA_Solyc11g069220 | -----               | -----               | -----              | -----               | -----              | 385  |
| SIMLO8_LEAF         | -----               | -----               | -----              | -----               | -----              | 424  |
|                     | 1,860               |                     | 1,880              |                     | 1,900              |      |
| gDNA_Solyc11g069220 | <b>AAAACGAGGC</b>   | <b>GTGAATTAAT</b>   | <b>TTTTTTTTTT</b>  | <b>TGGATTTGTA</b>   | <b>ATTTGCAGGG</b>  | 1900 |
| cDNA_Solyc11g069220 | -----               | -----               | -----              | -----               | -----G             | 386  |
| SIMLO8_LEAF         | -----               | -----               | -----              | -----               | -----G             | 425  |
|                     | 1,920               |                     | 1,940              |                     |                    |      |
| gDNA_Solyc11g069220 | <b>AAAAGTAGCA</b>   | <b>TTTGTGCTCG</b>   | <b>CTGATGGTAT</b>  | <b>TCATCAATTA</b>   | <b>CATATTTTCA</b>  | 1950 |
| cDNA_Solyc11g069220 | <b>AAAAGTAGCA</b>   | <b>TTTGTGCTCG</b>   | <b>CTGATGGTAT</b>  | <b>TCATCAATTA</b>   | <b>CATATTTTCA</b>  | 436  |
| SIMLO8_LEAF         | <b>AAAAGTAGCA</b>   | <b>TTTGTGCTCG</b>   | <b>CTGATGGTAT</b>  | <b>TCATCAATTA</b>   | <b>CATATTTTCA</b>  | 475  |
|                     | 1,960               |                     | 1,980              |                     | 2,000              |      |
| gDNA_Solyc11g069220 | <b>TTTTTGTGCT</b>   | <b>GGCTATTTTT</b>   | <b>CATGTATTTT</b>  | <b>ATTGTGTTAC</b>   | <b>CACATTGGCA</b>  | 2000 |
| cDNA_Solyc11g069220 | <b>TTTTTGTGCT</b>   | <b>GGCTATTTTT</b>   | <b>CATGTATTTT</b>  | <b>ATTGTGTTAC</b>   | <b>CACATTGGCA</b>  | 486  |
| SIMLO8_LEAF         | <b>TTTTTGTGCT</b>   | <b>GGCTATTTTT</b>   | <b>CATGTATTTT</b>  | <b>ATTGTGTTAC</b>   | <b>CACATTGGCA</b>  | 525  |

|                     |                   |                    |                    |                   |                   |      |
|---------------------|-------------------|--------------------|--------------------|-------------------|-------------------|------|
|                     |                   |                    | 2,020              |                   | 2,040             |      |
| gDNA_Solyc11g069220 | <b>TTGGGAAGAG</b> | <b>CTAAGGTATT</b>  | <b>TTAATCAAAC</b>  | <b>AATATATAAA</b> | <b>TAAATATTTA</b> | 2050 |
| cDNA_Solyc11g069220 | <b>TTGGGAAGAG</b> | <b>CTAAG</b>       | -----              | -----             | -----             | 501  |
| SIMLO8_LEAF         | <b>TTGGGAAGAG</b> | <b>CTAAG</b>       | -----              | -----             | -----             | 540  |
|                     | 2,060             |                    | 2,080              |                   | 2,100             |      |
| gDNA_Solyc11g069220 | <b>TTTACTTATT</b> | <b>TTTCCTTTTT</b>  | <b>TTAAAAAAA</b>   | <b>ATAGAAAATA</b> | <b>CTATAGAAGT</b> | 2100 |
| cDNA_Solyc11g069220 | -----             | -----              | -----              | -----             | -----             | 501  |
| SIMLO8_LEAF         | -----             | -----              | -----              | -----             | -----             | 540  |
|                     |                   | 2,120              |                    | 2,140             |                   |      |
| gDNA_Solyc11g069220 | <b>ATTCAAATA</b>  | <b>GGTCAAGTTA</b>  | <b>TTTTTTAATT</b>  | <b>TATTATTAAT</b> | <b>TTGGTTGTAT</b> | 2150 |
| cDNA_Solyc11g069220 | -----             | -----              | -----              | -----             | -----             | 501  |
| SIMLO8_LEAF         | -----             | -----              | -----              | -----             | -----             | 540  |
|                     | 2,160             |                    | 2,180              |                   | 2,200             |      |
| gDNA_Solyc11g069220 | <b>TTTATTAATT</b> | <b>TCAGATGAGT</b>  | <b>CGTTGGAAGA</b>  | <b>TATGGGAAAA</b> | <b>GGAAACAAGA</b> | 2200 |
| cDNA_Solyc11g069220 | -----             | <b>ATGAGT</b>      | <b>CGTTGGAAGA</b>  | <b>TATGGGAAAA</b> | <b>GGAAACAAGA</b> | 537  |
| SIMLO8_LEAF         | -----             | <b>ATGAGT</b>      | <b>CGTTGGAAGA</b>  | <b>TATGGGAAAA</b> | <b>GGAAACAAGA</b> | 576  |
|                     |                   | 2,220              |                    | 2,240             |                   |      |
| gDNA_Solyc11g069220 | <b>ACAGCTGAGT</b> | <b>ACCAAATTTTC</b> | <b>TCATGGTAAA</b>  | <b>AATCATCCTA</b> | <b>AAAAATAAAT</b> | 2250 |
| cDNA_Solyc11g069220 | <b>ACAGCTGAGT</b> | <b>ACCAAATTTTC</b> | <b>TCATG</b>       | -----             | -----             | 562  |
| SIMLO8_LEAF         | <b>ACAGCTGAGT</b> | <b>ACCAAATTTTC</b> | <b>TCATG</b>       | -----             | -----             | 601  |
|                     | 2,260             |                    | 2,280              |                   | 2,300             |      |
| gDNA_Solyc11g069220 | <b>TCGATCGAA</b>  | <b>AATTATCTCG</b>  | <b>TAAATATAG</b>   | <b>AGCATGTTAT</b> | <b>CAATGTCTAA</b> | 2300 |
| cDNA_Solyc11g069220 | -----             | -----              | -----              | -----             | -----             | 562  |
| SIMLO8_LEAF         | -----             | -----              | -----              | -----             | -----             | 601  |
|                     |                   | 2,320              |                    | 2,340             |                   |      |
| gDNA_Solyc11g069220 | <b>AATTTTTATT</b> | <b>TTTTTAGTAG</b>  | <b>TGTAAGAAAT</b>  | <b>TAAGAGTCAT</b> | <b>TATATTAACG</b> | 2350 |
| cDNA_Solyc11g069220 | -----             | -----              | -----              | -----             | -----             | 562  |
| SIMLO8_LEAF         | -----             | -----              | -----              | -----             | -----             | 601  |
|                     | 2,360             |                    | 2,380              |                   | 2,400             |      |
| gDNA_Solyc11g069220 | <b>TGTTAATAA</b>  | <b>TTTAACAGAT</b>  | <b>CCAGAGAGAT</b>  | <b>TTCGATTTGC</b> | <b>TAGAGATACA</b> | 2400 |
| cDNA_Solyc11g069220 | -----             | -----              | <b>ATCCAGAGAGA</b> | <b>TTCGATTTGC</b> | <b>TAGAGATACA</b> | 594  |
| SIMLO8_LEAF         | -----             | -----              | <b>ATCCAGAGAGA</b> | <b>TTCGATTTGC</b> | <b>TAGAGATACA</b> | 633  |
|                     |                   | 2,420              |                    | 2,440             |                   |      |
| gDNA_Solyc11g069220 | <b>TCATTTGGAA</b> | <b>GAAGACATTT</b>  | <b>GAGTTTTTGG</b>  | <b>ACTAAAAAT</b>  | <b>CAGTTCTTCT</b> | 2450 |
| cDNA_Solyc11g069220 | <b>TCATTTGGAA</b> | <b>GAAGACATTT</b>  | <b>GAGTTTTTGG</b>  | <b>ACTAAAAAT</b>  | <b>CAGTTCTTCT</b> | 644  |
| SIMLO8_LEAF         | <b>TCATTTGGAA</b> | <b>GAAGACATTT</b>  | <b>GAGTTTTTGG</b>  | <b>ACTAAAAAT</b>  | <b>CAGTTCTTCT</b> | 683  |
|                     | 2,460             |                    | 2,480              |                   | 2,500             |      |
| gDNA_Solyc11g069220 | <b>ATGGATTGTA</b> | <b>AGTATCCTTG</b>  | <b>ATCTCAAATT</b>  | <b>TATTATAAAA</b> | <b>ATAAATTTTG</b> | 2500 |
| cDNA_Solyc11g069220 | <b>ATGGATTGT</b>  | -----              | -----              | -----             | -----             | 653  |
| SIMLO8_LEAF         | <b>ATGGATTGT</b>  | -----              | -----              | -----             | -----             | 692  |
|                     |                   | 2,520              |                    | 2,540             |                   |      |
| gDNA_Solyc11g069220 | <b>AGTTAAAAA</b>  | <b>GTCTATTATA</b>  | <b>ATTGAAAAA</b>   | <b>ATATATTATG</b> | <b>TTATATTTTT</b> | 2550 |
| cDNA_Solyc11g069220 | -----             | -----              | -----              | -----             | -----             | 653  |
| SIMLO8_LEAF         | -----             | -----              | -----              | -----             | -----             | 692  |
|                     | 2,560             |                    | 2,580              |                   | 2,600             |      |
| gDNA_Solyc11g069220 | <b>ACATTTAACT</b> | <b>ATTTTATTTG</b>  | <b>TAATTTAATT</b>  | <b>TGCAGGTTTG</b> | <b>TTTCTTCAGG</b> | 2600 |
| cDNA_Solyc11g069220 | -----             | -----              | -----              | <b>TTG</b>        | <b>TTTCTTCAGG</b> | 666  |
| SIMLO8_LEAF         | -----             | -----              | -----              | <b>TTG</b>        | <b>TTTCTTCAGG</b> | 705  |
|                     |                   | 2,620              |                    | 2,640             |                   |      |
| gDNA_Solyc11g069220 | <b>CAATTTGTAA</b> | <b>GATCTGTTCC</b>  | <b>AAAAGTTGAT</b>  | <b>TATTTGACCC</b> | <b>TACGACATGG</b> | 2650 |
| cDNA_Solyc11g069220 | <b>CAATTTGTAA</b> | <b>GATCTGTTCC</b>  | <b>AAAAGTTGAT</b>  | <b>TATTTGACCC</b> | <b>TACGACATGG</b> | 716  |
| SIMLO8_LEAF         | <b>CAATTTGTAA</b> | <b>GATCTGTTCC</b>  | <b>AAAAGTTGAT</b>  | <b>TATTTGACCC</b> | <b>TACGACATGG</b> | 755  |
|                     | 2,660             |                    | 2,680              |                   | 2,700             |      |
| gDNA_Solyc11g069220 | <b>TTTTATCAGG</b> | <b>GTAACACAT</b>   | <b>AATAAATAAT</b>  | <b>TAATATAAAT</b> | <b>GATATAACTA</b> | 2700 |
| cDNA_Solyc11g069220 | <b>TTTTATCAGG</b> | -----              | -----              | -----             | -----             | 726  |
| SIMLO8_LEAF         | <b>TTTTATCAGG</b> | <b>GCACA</b>       | <b>TTTGG</b>       | <b>CACCTCAGAG</b> | <b>CAACA</b>      | 795  |
|                     |                   | 2,720              |                    | 2,740             |                   |      |
| gDNA_Solyc11g069220 | <b>ATTAATCTTG</b> | <b>AAAATTTAAT</b>  | <b>GATAATTCAG</b>  | <b>TTCATTAAT</b>  | <b>AAATATATGA</b> | 2750 |
| cDNA_Solyc11g069220 | -----             | -----              | -----              | -----             | -----             | 726  |
| SIMLO8_LEAF         | -----             | -----              | -----              | -----             | -----             | 795  |
|                     | 2,760             |                    | 2,780              |                   | 2,800             |      |
| gDNA_Solyc11g069220 | <b>AAATGGAAAA</b> | <b>TGACAATTTA</b>  | <b>TGAGTTTCTT</b>  | <b>TCAATATATA</b> | <b>ATTTTTTTAA</b> | 2800 |
| cDNA_Solyc11g069220 | -----             | -----              | -----              | -----             | -----             | 726  |
| SIMLO8_LEAF         | -----             | -----              | -----              | -----             | -----             | 795  |
|                     |                   | 2,820              |                    | 2,840             |                   |      |
| gDNA_Solyc11g069220 | <b>AAAAATCAT</b>  | <b>ATATTTTTTA</b>  | <b>AAGCACAGAT</b>  | <b>GAATGATGTA</b> | <b>CAGACTCAAT</b> | 2850 |
| cDNA_Solyc11g069220 | -----             | -----              | -----              | -----             | -----             | 726  |
| SIMLO8_LEAF         | -----             | -----              | -----              | -----             | -----             | 795  |
|                     | 2,860             |                    | 2,880              |                   | 2,900             |      |
| gDNA_Solyc11g069220 | <b>GAATTCAAAA</b> | <b>AAACTGACGC</b>  | <b>AAGCCATAAA</b>  | <b>TATATAGATA</b> | <b>TAACTAAAA</b>  | 2900 |
| cDNA_Solyc11g069220 | -----             | -----              | -----              | -----             | -----             | 726  |
| SIMLO8_LEAF         | -----             | -----              | -----              | -----             | -----             | 795  |
|                     |                   | 2,920              |                    | 2,940             |                   |      |
| gDNA_Solyc11g069220 | <b>TTATAAAGGT</b> | <b>CTGAATTCAT</b>  | <b>TACCTTTAAT</b>  | <b>CGGAGTATAT</b> | <b>TTATTTAAAA</b> | 2950 |
| cDNA_Solyc11g069220 | -----             | -----              | -----              | -----             | -----             | 726  |
| SIMLO8_LEAF         | -----             | -----              | -----              | -----             | -----             | 795  |
|                     | 2,960             |                    | 2,980              |                   | 3,000             |      |
| gDNA_Solyc11g069220 | <b>TTATATATAT</b> | <b>ATATATATAT</b>  | <b>ATATATATAT</b>  | <b>ATATATATAT</b> | <b>ATATATANN</b>  | 3000 |
| cDNA_Solyc11g069220 | -----             | -----              | -----              | -----             | -----             | 726  |
| SIMLO8_LEAF         | -----             | -----              | -----              | -----             | -----             | 795  |

|                     |             |              |             |                            |               |      |
|---------------------|-------------|--------------|-------------|----------------------------|---------------|------|
|                     |             |              | 3,020       |                            | 3,040         |      |
| gDNA_Solyc11g069220 | NNNNNNNNNN  | NNNNNNNNNN   | NNNNNNNNNN  | NNNNNNNNNN                 | NNNNNNNNNN    | 3050 |
| cDNA_Solyc11g069220 | -----       | -----        | -----       | -----                      | -----         | 726  |
| SIMLO8_LEAF         | -----       | -----        | -----       | -----                      | -----         | 795  |
|                     | 3,060       |              | 3,080       |                            | 3,100         |      |
| gDNA_Solyc11g069220 | NNNNNNNNNN  | NNNNNNNNNN   | NNNNNNNNNN  | NNNNNNNNNN                 | NNNNNNNNNN    | 3100 |
| cDNA_Solyc11g069220 | -----       | -----        | -----       | -----                      | -----         | 726  |
| SIMLO8_LEAF         | -----       | -----        | -----       | -----                      | -----         | 795  |
|                     |             | 3,120        |             | 3,140                      |               |      |
| gDNA_Solyc11g069220 | NNNNNNNNNN  | NNNNNNNNNN   | NNNNNNNNNN  | NNNNNNNNNN                 | NNNNNNNNNN    | 3150 |
| cDNA_Solyc11g069220 | -----       | -----        | -----       | -----                      | -----         | 726  |
| SIMLO8_LEAF         | -----       | -----        | -----       | -----                      | -----         | 795  |
|                     | 3,160       |              | 3,180       |                            | 3,200         |      |
| gDNA_Solyc11g069220 | NNNNNNNNNN  | NNNNNNNNNN   | NNNNNNNNNN  | NNNNNNNNNN                 | NNNNNNNNNN    | 3200 |
| cDNA_Solyc11g069220 | -----       | -----        | -----       | -----                      | -----         | 726  |
| SIMLO8_LEAF         | -----       | -----        | -----       | -----                      | -----         | 795  |
|                     |             | 3,220        |             | 3,240                      |               |      |
| gDNA_Solyc11g069220 | NNNNNNNNNN  | NNNNNNNNNN   | NNNNNNNNNN  | NNNNNNNNNN                 | NNNNNNNNNN    | 3250 |
| cDNA_Solyc11g069220 | -----       | -----        | -----       | -----                      | -----         | 726  |
| SIMLO8_LEAF         | -----       | -----        | -----       | -----                      | -----         | 795  |
|                     | 3,260       |              | 3,280       |                            | 3,300         |      |
| gDNA_Solyc11g069220 | NNNNNNNNNN  | NNNNNNNNNN   | NNNNNNNNNN  | NNNNNNNNNN                 | NNNNNNNNNN    | 3300 |
| cDNA_Solyc11g069220 | -----       | -----        | -----       | -----                      | -----         | 726  |
| SIMLO8_LEAF         | -----       | -----        | -----       | -----                      | -----         | 795  |
|                     |             | 3,320        |             | 3,340                      |               |      |
| gDNA_Solyc11g069220 | NNNNNNNNNN  | NNNNNNNNNN   | NNNNNNNNNN  | NNNNNNNNNN                 | NNNNNNNNNN    | 3350 |
| cDNA_Solyc11g069220 | -----       | -----        | -----       | -----                      | -----         | 726  |
| SIMLO8_LEAF         | -----       | -----        | -----       | -----                      | -----         | 795  |
|                     | 3,360       |              | 3,380       |                            | 3,400         |      |
| gDNA_Solyc11g069220 | NNNNNNNNNN  | NNNNNNNNNN   | NNNNNNNNNN  | NNNNNNNNNN                 | NNNNNNNNNN    | 3400 |
| cDNA_Solyc11g069220 | -----       | -----        | -----       | -----                      | -----         | 726  |
| SIMLO8_LEAF         | -----       | -----        | -----       | -----                      | -----         | 795  |
|                     |             | 3,420        |             | 3,440                      |               |      |
| gDNA_Solyc11g069220 | NNNNNNNNNN  | NNNNNNNNNN   | NNNNNNNNNN  | NNNNNNNNNN                 | NNNNNNNNNN    | 3450 |
| cDNA_Solyc11g069220 | -----       | -----        | -----       | -----                      | -----         | 726  |
| SIMLO8_LEAF         | -----       | -----        | -----       | -----                      | -----         | 795  |
|                     | 3,460       |              | 3,480       |                            | 3,500         |      |
| gDNA_Solyc11g069220 | NNNNNNNNNN  | NNNNNNNNNN   | NNNNNNNNNN  | NNNNNNNNNN                 | NNNNNNNNNN    | 3500 |
| cDNA_Solyc11g069220 | -----       | -----        | -----       | -----                      | -----         | 726  |
| SIMLO8_LEAF         | -----       | -----        | -----       | -----                      | -----         | 795  |
|                     |             | 3,520        |             | 3,540                      |               |      |
| gDNA_Solyc11g069220 | NNNNNNNNNN  | NNNNNNNNNN   | NNNNNNNNNN  | NNNNNNNNNN                 | NNNNNNNNNN    | 3550 |
| cDNA_Solyc11g069220 | -----       | -----        | -----       | -----                      | -----         | 726  |
| SIMLO8_LEAF         | -----       | -----        | -----       | -----                      | -----         | 795  |
|                     | 3,560       |              | 3,580       |                            | 3,600         |      |
| gDNA_Solyc11g069220 | NNNNNNNNNN  | NNNNNNNNNN   | NNNNNNNNNN  | NNNNNNNNNN                 | NNNNNNNNNN    | 3600 |
| cDNA_Solyc11g069220 | -----       | -----        | -----       | -----                      | -----         | 726  |
| SIMLO8_LEAF         | -----       | -----        | -----       | -----                      | -----         | 795  |
|                     |             | 3,620        |             | 3,640                      |               |      |
| gDNA_Solyc11g069220 | NNNNNNNNNN  | NNNNNNNNNN   | NNNNNNNNNN  | NNNNNNNNNN                 | NNNNNNNNNN    | 3650 |
| cDNA_Solyc11g069220 | -----       | -----        | -----       | -----                      | -----         | 726  |
| SIMLO8_LEAF         | -----       | -----        | -----       | -----                      | -----         | 795  |
|                     | 3,660       |              | 3,680       |                            | 3,700         |      |
| gDNA_Solyc11g069220 | NNNNNNNNNN  | NNNNNNNNNN   | NNNNNNNNNN  | NNNNA TTAAG                | AGG TCA TT AG | 3700 |
| cDNA_Solyc11g069220 | -----       | -----        | -----       | -----                      | -----         | 726  |
| SIMLO8_LEAF         | -----       | -----        | -----       | TTT G ATTTCAAAA ATATATTAAG | AGG TCA TT AG | 829  |
|                     |             | 3,720        |             | 3,740                      |               |      |
| gDNA_Solyc11g069220 | AAGAAGACTT  | CAAAGTAGTT   | GTTAGCATAA  | GGTATTTTTT                 | GACCTTCAAA    | 3750 |
| cDNA_Solyc11g069220 | -----       | -----        | -----       | -----                      | -----         | 726  |
| SIMLO8_LEAF         | AAGAAGAC TT | CAAAG TAG TT | GTTAGCA TAA | G-----                     | -----         | 860  |
|                     | 3,760       |              | 3,780       |                            | 3,800         |      |
| gDNA_Solyc11g069220 | CTTATAATTA  | TTATTTCTAA   | ATTTAAATAA  | TTAAATATAC                 | TTTGATCCTT    | 3800 |
| cDNA_Solyc11g069220 | -----       | -----        | -----       | -----                      | -----         | 726  |
| SIMLO8_LEAF         | -----       | -----        | -----       | -----                      | -----         | 860  |
|                     |             | 3,820        |             | 3,840                      |               |      |
| gDNA_Solyc11g069220 | TTTTTTTTTG  | GCAAAAATAT   | TGTGTTTATT  | CCATATATAG                 | CCAAAATTGA    | 3850 |
| cDNA_Solyc11g069220 | -----       | -----        | -----       | -----                      | -----         | 726  |
| SIMLO8_LEAF         | -----       | -----        | -----       | -----                      | -----         | 860  |
|                     | 3,860       |              | 3,880       |                            | 3,900         |      |
| gDNA_Solyc11g069220 | TCTTCTTTT   | TTGTTGTATT   | TTTTTGCAG   | TCCACCAATT                 | TGGTTCCTTG    | 3900 |
| cDNA_Solyc11g069220 | -----       | -----        | -----       | TCCACCAATT                 | TGGTTCCTTG    | 746  |
| SIMLO8_LEAF         | -----       | -----        | -----       | TCCACCAATT                 | TGGTTCCTTG    | 880  |
|                     |             | 3,920        |             | 3,940                      |               |      |
| gDNA_Solyc11g069220 | CTGTATTATT  | CCTACTCTTC   | AATACTCATG  | GTAATAAAT                  | ACTGAAATTA    | 3950 |
| cDNA_Solyc11g069220 | CTG-----    | -----        | -----       | -----                      | -----         | 749  |
| SIMLO8_LEAF         | CTGTATTATT  | CCTACTCTTC   | AATACTCATG  | G-----                     | -----         | 911  |
|                     | 3,960       |              | 3,980       |                            | 4,000         |      |
| gDNA_Solyc11g069220 | ACTTTCAATT  | AATTAAAATA   | TACGTTTTTG  | ATATCATATC                 | AATATTATAT    | 4000 |
| cDNA_Solyc11g069220 | -----       | -----        | -----       | -----                      | -----         | 749  |
| SIMLO8_LEAF         | -----       | -----        | -----       | -----                      | -----         | 911  |

|                     |                    |                   |                    |                    |                       |      |
|---------------------|--------------------|-------------------|--------------------|--------------------|-----------------------|------|
|                     |                    |                   | 4,020              |                    | 4,040                 |      |
| gDNA_Solyc11g069220 | <b>TATATTCTAA</b>  | <b>CTATTTATAA</b> | <b>AAGTGTGTCA</b>  | <b>CACTCAAATA</b>  | <b>TGAAGTGAAA</b>     | 4050 |
| cDNA_Solyc11g069220 | -----              | -----             | -----              | -----              | -----                 | 749  |
| SIMLO8_LEAF         | -----              | -----             | -----              | -----              | -----                 | 911  |
|                     | 4,060              |                   | 4,080              |                    | 4,100                 |      |
| gDNA_Solyc11g069220 | <b>ATAAAGTTTA</b>  | <b>ATTTAGTACA</b> | <b>CATATATATT</b>  | <b>CAAAATAGTAA</b> | <b>AACGATTGAT</b>     | 4100 |
| cDNA_Solyc11g069220 | -----              | -----             | -----              | -----              | -----                 | 749  |
| SIMLO8_LEAF         | -----              | -----             | -----              | -----              | -----                 | 911  |
|                     |                    | 4,120             |                    | 4,140              |                       |      |
| gDNA_Solyc11g069220 | <b>ACTTCAAGTA</b>  | <b>AACATTTTTT</b> | <b>TAAATTTTTA</b>  | <b>ATCAAATATT</b>  | <b>TCGAGTTTAA</b>     | 4150 |
| cDNA_Solyc11g069220 | -----              | -----             | -----              | -----              | -----                 | 749  |
| SIMLO8_LEAF         | -----              | -----             | -----              | -----              | -----                 | 911  |
|                     | 4,160              |                   | 4,180              |                    | 4,200                 |      |
| gDNA_Solyc11g069220 | <b>ATTTTAAATA</b>  | <b>TGTAAAATTA</b> | <b>ATCAATTTTA</b>  | <b>TTACGGAATG</b>  | <b>CTTTGTCTTT</b>     | 4200 |
| cDNA_Solyc11g069220 | -----              | -----             | -----              | -----              | -----                 | 749  |
| SIMLO8_LEAF         | -----              | -----             | -----              | -----              | -----                 | 911  |
|                     |                    | 4,220             |                    | 4,240              |                       |      |
| gDNA_Solyc11g069220 | <b>TGATTTGAAC</b>  | <b>TTTCCAATAT</b> | <b>GAATCTAAAT</b>  | <b>GTCCTTACCT</b>  | <b>TTTGGTATAA</b>     | 4250 |
| cDNA_Solyc11g069220 | -----              | -----             | -----              | -----              | -----                 | 749  |
| SIMLO8_LEAF         | -----              | -----             | -----              | -----              | -----                 | 911  |
|                     | 4,260              |                   | 4,280              |                    | 4,300                 |      |
| gDNA_Solyc11g069220 | <b>ATTTTTTTAA</b>  | <b>TATAAATTTA</b> | <b>AATTTAATCA</b>  | <b>AATTTTAATA</b>  | <b>TAATTATCGA</b>     | 4300 |
| cDNA_Solyc11g069220 | -----              | -----             | -----              | -----              | -----                 | 749  |
| SIMLO8_LEAF         | -----              | -----             | -----              | -----              | -----                 | 911  |
|                     |                    | 4,320             |                    | 4,340              |                       |      |
| gDNA_Solyc11g069220 | <b>AATTTATTAA</b>  | <b>GTAATTTTCA</b> | <b>TGTCATTTGT</b>  | <b>GGACAGGCTG</b>  | <b>GTATTCTTAT</b>     | 4350 |
| cDNA_Solyc11g069220 | -----              | -----             | -----              | -----              | <b>GTATTCTTAT</b>     | 759  |
| SIMLO8_LEAF         | -----              | -----             | -----              | -----              | <b>CTG GTATTCTTAT</b> | 924  |
|                     | 4,360              |                   | 4,380              |                    | 4,400                 |      |
| gDNA_Solyc11g069220 | <b>CTGTGGCTAC</b>  | <b>CGTTCATTCC</b> | <b>GTTACTTGT</b>   | <b>AGTATTTCCA</b>  | <b>AAATCATTTC</b>     | 4400 |
| cDNA_Solyc11g069220 | <b>CTGTGGCTAC</b>  | <b>CGTTCATTCC</b> | <b>GTTACTTGT</b>   | -----              | -----                 | 788  |
| SIMLO8_LEAF         | <b>CTGTGGCTAC</b>  | <b>CGTTCATTCC</b> | <b>GTTACTTGT</b>   | -----              | -----                 | 953  |
|                     |                    | 4,420             |                    | 4,440              |                       |      |
| gDNA_Solyc11g069220 | <b>GCAATTTGACT</b> | <b>TTTATTCATT</b> | <b>TATTTCTATT</b>  | <b>TTTCATATTT</b>  | <b>TATATATATA</b>     | 4450 |
| cDNA_Solyc11g069220 | -----              | -----             | -----              | -----              | -----                 | 788  |
| SIMLO8_LEAF         | -----              | -----             | -----              | -----              | -----                 | 953  |
|                     | 4,460              |                   | 4,480              |                    | 4,500                 |      |
| gDNA_Solyc11g069220 | <b>TCCATCTTCC</b>  | <b>CATAGTCATA</b> | <b>TACAATAATT</b>  | <b>TTTAATAATT</b>  | <b>CTTTATGTAC</b>     | 4500 |
| cDNA_Solyc11g069220 | -----              | -----             | -----              | -----              | -----                 | 788  |
| SIMLO8_LEAF         | -----              | -----             | -----              | -----              | -----                 | 953  |
|                     |                    | 4,520             |                    | 4,540              |                       |      |
| gDNA_Solyc11g069220 | <b>TAAAAAATTA</b>  | <b>TTTATTACAT</b> | <b>CTCTCTATTT</b>  | <b>TAATTTATGT</b>  | <b>TGTATTTTTT</b>     | 4550 |
| cDNA_Solyc11g069220 | -----              | -----             | -----              | -----              | -----                 | 788  |
| SIMLO8_LEAF         | -----              | -----             | -----              | -----              | -----                 | 953  |
|                     | 4,560              |                   | 4,580              |                    | 4,600                 |      |
| gDNA_Solyc11g069220 | <b>ATTTTTCGAG</b>  | <b>AGCTAATAAA</b> | <b>TAATTTAAAGC</b> | <b>ATGACTGAGA</b>  | <b>ATTTACACAT</b>     | 4600 |
| cDNA_Solyc11g069220 | -----              | -----             | -----              | -----              | -----                 | 788  |
| SIMLO8_LEAF         | -----              | -----             | -----              | -----              | -----                 | 953  |
|                     |                    | 4,620             |                    | 4,640              |                       |      |
| gDNA_Solyc11g069220 | <b>GAATTATAAT</b>  | <b>ATTTTTTTAA</b> | <b>AAATGAAATT</b>  | <b>TATACATATG</b>  | <b>TAAACTATGT</b>     | 4650 |
| cDNA_Solyc11g069220 | -----              | -----             | -----              | -----              | -----                 | 788  |
| SIMLO8_LEAF         | -----              | -----             | -----              | -----              | -----                 | 953  |
|                     | 4,660              |                   | 4,680              |                    | 4,700                 |      |
| gDNA_Solyc11g069220 | <b>AATTTAAAGAG</b> | <b>TATTATAATT</b> | <b>CACAATAATT</b>  | <b>GACAATTCAA</b>  | <b>AATATTTAAA</b>     | 4700 |
| cDNA_Solyc11g069220 | -----              | -----             | -----              | -----              | -----                 | 788  |
| SIMLO8_LEAF         | -----              | -----             | -----              | -----              | -----                 | 953  |
|                     |                    | 4,720             |                    | 4,740              |                       |      |
| gDNA_Solyc11g069220 | <b>AGATATACGG</b>  | <b>AAAAATTTAC</b> | <b>AGTCTTGTTT</b>  | <b>GAATCTCAAA</b>  | <b>ATTTAAAAAA</b>     | 4750 |
| cDNA_Solyc11g069220 | -----              | -----             | -----              | -----              | -----                 | 788  |
| SIMLO8_LEAF         | -----              | -----             | -----              | -----              | -----                 | 953  |
|                     | 4,760              |                   | 4,780              |                    | 4,800                 |      |
| gDNA_Solyc11g069220 | <b>TACCACATAA</b>  | <b>ATTAAGATGG</b> | <b>AAAGAATATT</b>  | <b>AATTACACAG</b>  | <b>TATTATATAT</b>     | 4800 |
| cDNA_Solyc11g069220 | -----              | -----             | -----              | -----              | -----                 | 788  |
| SIMLO8_LEAF         | -----              | -----             | -----              | -----              | -----                 | 953  |
|                     |                    | 4,820             |                    | 4,840              |                       |      |
| gDNA_Solyc11g069220 | <b>TAAC TTGAGA</b> | <b>TTGTTAATCG</b> | <b>TATAACAAC T</b> | <b>CATCATAATT</b>  | <b>TTTGAATTCC</b>     | 4850 |
| cDNA_Solyc11g069220 | -----              | -----             | -----              | -----              | -----                 | 788  |
| SIMLO8_LEAF         | -----              | -----             | -----              | -----              | -----                 | 953  |
|                     | 4,860              |                   | 4,880              |                    | 4,900                 |      |
| gDNA_Solyc11g069220 | <b>GAATTTTGTC</b>  | <b>TATGTTTTTT</b> | <b>GATGCTTTTA</b>  | <b>ATATTCGTAA</b>  | <b>AAATTCGTAC</b>     | 4900 |
| cDNA_Solyc11g069220 | -----              | -----             | -----              | -----              | -----                 | 788  |
| SIMLO8_LEAF         | -----              | -----             | -----              | -----              | -----                 | 953  |
|                     |                    | 4,920             |                    | 4,940              |                       |      |
| gDNA_Solyc11g069220 | <b>TTGTCATCG</b>   | <b>ATCGATACAG</b> | <b>GTGATATTAT</b>  | <b>TAGTAGGGAC</b>  | <b>TAAACTACAA</b>     | 4950 |
| cDNA_Solyc11g069220 | -----              | -----             | <b>GA TATTAT</b>   | <b>TAGTAGGGAC</b>  | <b>TAAAC TACAA</b>    | 816  |
| SIMLO8_LEAF         | -----              | -----             | <b>GA TATTAT</b>   | <b>TAGTAGGGAC</b>  | <b>TAAAC TACAA</b>    | 981  |
|                     | 4,960              |                   | 4,980              |                    | 5,000                 |      |
| gDNA_Solyc11g069220 | <b>GTGATTATAA</b>  | <b>CAAAAATGGG</b> | <b>ATTAAGAATT</b>  | <b>CAAGAAAGGG</b>  | <b>GAGAAGTAGT</b>     | 5000 |
| cDNA_Solyc11g069220 | <b>GTGATTATAA</b>  | <b>CAAAAATGGG</b> | <b>ATTAAGAATT</b>  | <b>CAAGAAAGGG</b>  | <b>GAGAAGTAGT</b>     | 866  |
| SIMLO8_LEAF         | <b>GTGATTATAA</b>  | <b>CAAAAATGGG</b> | <b>ATTAAGAATT</b>  | <b>CAAGAAAGGG</b>  | <b>GAGAAGTAGT</b>     | 1031 |



|                     |                   |                   |                    |                   |                    |
|---------------------|-------------------|-------------------|--------------------|-------------------|--------------------|
|                     |                   | 5,020             |                    | 5,040             |                    |
| gDNA_Solyc11g069220 | <b>GAAGGGGT</b>   | <b>CCTGTGGTTC</b> | <b>AACCTGGAGA</b>  | <b>TGATTTATTT</b> | <b>TGGTTTAAATC</b> |
| cDNA_Solyc11g069220 | <b>GAAGGGGT</b>   | <b>CCTGTGGTTC</b> | <b>AACCTGGAGA</b>  | <b>TGATTTATTT</b> | <b>TGGTTTAAATC</b> |
| SIMLO8_LEAF         | <b>GAAGGGGT</b>   | <b>CCTGTGGTTC</b> | <b>AACCTGGAGA</b>  | <b>TGATTTATTT</b> | <b>TGGTTTAAATC</b> |
|                     | 5,060             |                   | 5,080              |                   | 5,100              |
| gDNA_Solyc11g069220 | <b>GTCTCGTCT</b>  | <b>ACTACTTTTT</b> | <b>TTAATTAATT</b>  | <b>TTGTTCTTTT</b> | <b>TCAGGTATTT</b>  |
| cDNA_Solyc11g069220 | <b>GTCTCGTCT</b>  | <b>ACTACTTTTT</b> | <b>TTAATTAATT</b>  | <b>TTGTTCTTTT</b> | <b>TCAG-----</b>   |
| SIMLO8_LEAF         | <b>GTCTCGTCT</b>  | <b>ACTACTTTTT</b> | <b>TTAATTAATT</b>  | <b>TTGTTCTTTT</b> | <b>TCAG-----</b>   |
|                     | 5,120             |                   | 5,140              |                   |                    |
| gDNA_Solyc11g069220 | <b>TTTAAATATT</b> | <b>TATTTTTAAG</b> | <b>AAAAGTCATT</b>  | <b>TTTTAAAATT</b> | <b>TAAATAATTT</b>  |
| cDNA_Solyc11g069220 | -----             | -----             | -----              | -----             | -----              |
| SIMLO8_LEAF         | -----             | -----             | -----              | -----             | -----              |
|                     | 5,160             |                   | 5,180              |                   | 5,200              |
| gDNA_Solyc11g069220 | <b>AATTTTTATT</b> | <b>TTTGATCTTG</b> | <b>TTAATATATA</b>  | <b>TATATATATA</b> | <b>TATATATTAT</b>  |
| cDNA_Solyc11g069220 | -----             | -----             | -----              | -----             | -----              |
| SIMLO8_LEAF         | -----             | -----             | -----              | -----             | -----              |
|                     | 5,220             |                   | 5,240              |                   |                    |
| gDNA_Solyc11g069220 | <b>TTTTTTTTTT</b> | <b>TTTGATTTTA</b> | <b>TTGCAGAATG</b>  | <b>CTTTTCAATT</b> | <b>GGCTTTCTTT</b>  |
| cDNA_Solyc11g069220 | -----             | -----             | -----AATG          | <b>CTTTTCAATT</b> | <b>GGCTTTCTTT</b>  |
| SIMLO8_LEAF         | -----             | -----             | -----AATG          | <b>CTTTTCAATT</b> | <b>GGCTTTCTTT</b>  |
|                     | 5,260             |                   | 5,280              |                   | 5,300              |
| gDNA_Solyc11g069220 | <b>GCTTGGACTT</b> | <b>GGGTAAGTCC</b> | <b>ACCAATTAAC</b>  | <b>TCTACTAGTA</b> | <b>ATATCAACTT</b>  |
| cDNA_Solyc11g069220 | <b>GCTTGGACTT</b> | <b>GG-----</b>    | -----              | -----             | -----              |
| SIMLO8_LEAF         | <b>GCTTGGACTT</b> | <b>GG-----</b>    | -----              | -----             | -----              |
|                     | 5,320             |                   | 5,340              |                   |                    |
| gDNA_Solyc11g069220 | <b>TCGAAAATCG</b> | <b>ATAAAATAGT</b> | <b>TATTGGCGTG</b>  | <b>GAGTTTCGAA</b> | <b>TTTCATTGTG</b>  |
| cDNA_Solyc11g069220 | -----             | -----             | -----              | -----             | -----              |
| SIMLO8_LEAF         | -----             | -----             | -----              | -----             | -----              |
|                     | 5,360             |                   | 5,380              |                   | 5,400              |
| gDNA_Solyc11g069220 | <b>GAAAATATTT</b> | <b>TGGATTCTAT</b> | <b>TTGTTATAAT</b>  | <b>AATAACGGTA</b> | <b>TAATGTATTA</b>  |
| cDNA_Solyc11g069220 | -----             | -----             | -----              | -----             | -----              |
| SIMLO8_LEAF         | -----             | -----             | -----              | -----             | -----              |
|                     | 5,420             |                   | 5,440              |                   |                    |
| gDNA_Solyc11g069220 | <b>AGTATAATTT</b> | <b>TATAAGTGAG</b> | <b>GTCTGAAGGG</b>  | <b>TAGTTTGGTC</b> | <b>GGTTAGTGGT</b>  |
| cDNA_Solyc11g069220 | -----             | -----             | -----              | -----             | -----              |
| SIMLO8_LEAF         | -----             | -----             | -----              | -----             | -----              |
|                     | 5,460             |                   | 5,480              |                   | 5,500              |
| gDNA_Solyc11g069220 | <b>GGAGCCACCT</b> | <b>TATATTCAGG</b> | <b>TGTTCATCTG</b>  | <b>AATTTTTTTT</b> | <b>TGGCAGAAAA</b>  |
| cDNA_Solyc11g069220 | -----             | -----             | -----              | -----             | -----              |
| SIMLO8_LEAF         | -----             | -----             | -----              | -----             | -----              |
|                     | 5,520             |                   | 5,540              |                   |                    |
| gDNA_Solyc11g069220 | <b>TTATATTATT</b> | <b>TATTCATGCT</b> | <b>TAAAATCACT</b>  | <b>TTTAGGTATA</b> | <b>TATAGTAGAT</b>  |
| cDNA_Solyc11g069220 | -----             | -----             | -----              | -----             | -----              |
| SIMLO8_LEAF         | -----             | -----             | -----              | -----             | -----              |
|                     | 5,560             |                   | 5,580              |                   | 5,600              |
| gDNA_Solyc11g069220 | <b>GTCGAATTCT</b> | <b>CTTCGGCTAT</b> | <b>TTCGTGTGTC</b>  | <b>TATTTCCTTA</b> | <b>AATTTTAAAT</b>  |
| cDNA_Solyc11g069220 | -----             | -----             | -----              | -----             | -----              |
| SIMLO8_LEAF         | -----             | -----             | -----              | -----             | -----              |
|                     | 5,620             |                   | 5,640              |                   |                    |
| gDNA_Solyc11g069220 | <b>TCTTTTATTG</b> | <b>AAAATTTTGA</b> | <b>CTTAGCCGTT</b>  | <b>GCAGTCAGTA</b> | <b>TACTAAGCTT</b>  |
| cDNA_Solyc11g069220 | -----             | -----             | -----              | -----             | -----              |
| SIMLO8_LEAF         | -----             | -----             | -----              | -----             | -----              |
|                     | 5,660             |                   | 5,680              |                   | 5,700              |
| gDNA_Solyc11g069220 | <b>CCGCAATATA</b> | <b>GGTTCCTATT</b> | <b>ATAAAAACAA</b>  | <b>TTATCACGTA</b> | <b>TCTTTATAAG</b>  |
| cDNA_Solyc11g069220 | -----             | -----             | -----              | -----             | -----              |
| SIMLO8_LEAF         | -----             | -----             | -----              | -----             | -----              |
|                     | 5,720             |                   | 5,740              |                   |                    |
| gDNA_Solyc11g069220 | <b>AGACTGTTTT</b> | <b>CACATTCTGT</b> | <b>ATATTACGGG</b>  | <b>ACAACAATTT</b> | <b>ATAAACATAT</b>  |
| cDNA_Solyc11g069220 | -----             | -----             | -----              | -----             | -----              |
| SIMLO8_LEAF         | -----             | -----             | -----              | -----             | -----              |
|                     | 5,760             |                   | 5,780              |                   | 5,800              |
| gDNA_Solyc11g069220 | <b>AATAGTATTT</b> | <b>TGAAATTTCA</b> | <b>TGATAACAAC</b>  | <b>TATTTGTCAA</b> | <b>TTATAAGGAC</b>  |
| cDNA_Solyc11g069220 | -----             | -----             | -----              | -----             | -----              |
| SIMLO8_LEAF         | -----             | -----             | -----              | -----             | -----              |
|                     | 5,820             |                   | 5,840              |                   |                    |
| gDNA_Solyc11g069220 | <b>CGAAAAGTGA</b> | <b>TTATTTGCGA</b> | <b>ATTATATCTC</b>  | <b>ATAATTAATT</b> | <b>CTTATTTTGT</b>  |
| cDNA_Solyc11g069220 | -----             | -----             | -----              | -----             | -----              |
| SIMLO8_LEAF         | -----             | -----             | -----              | -----             | -----              |
|                     | 5,860             |                   | 5,880              |                   | 5,900              |
| gDNA_Solyc11g069220 | <b>TTGATTTCTC</b> | <b>TTGTAATTTA</b> | <b>AAAAAAAACA</b>  | <b>GTATGAATTT</b> | <b>GGGCTGAAAT</b>  |
| cDNA_Solyc11g069220 | -----             | -----             | -----              | -----TATGAATTT    | <b>GGGCTGAAAT</b>  |
| SIMLO8_LEAF         | -----             | -----             | -----              | -----TATGAATTT    | <b>GGGCTGAAAT</b>  |
|                     | 5,920             |                   | 5,940              |                   |                    |
| gDNA_Solyc11g069220 | <b>CTTGTTTCCA</b> | <b>TGACCAAAC</b>  | <b>TGAGGACATCG</b> | <b>TAATTAGAAT</b> | <b>GACAATGGGG</b>  |
| cDNA_Solyc11g069220 | <b>CTTGTTTCCA</b> | <b>TGACCAAAC</b>  | <b>TGAGGACATCG</b> | <b>TAATTAGAAT</b> | <b>GACAATGGGG</b>  |
| SIMLO8_LEAF         | <b>CTTGTTTCCA</b> | <b>TGACCAAAC</b>  | <b>TGAGGACATCG</b> | <b>TAATTAGAAT</b> | <b>GACAA TGGGG</b> |
|                     | 5,960             |                   | 5,980              |                   | 6,000              |
| gDNA_Solyc11g069220 | <b>TTAGTATTAA</b> | <b>TTATTTTCTA</b> | <b>ATTTATAAAT</b>  | <b>AAAAATTTAT</b> | <b>TAATTTGATC</b>  |
| cDNA_Solyc11g069220 | -----             | -----             | -----              | -----             | -----              |
| SIMLO8_LEAF         | -----             | -----             | -----              | -----             | -----              |

|                     |                    |                    |                    |                   |                     |      |
|---------------------|--------------------|--------------------|--------------------|-------------------|---------------------|------|
|                     |                    |                    | 6,020              |                   | 6,040               |      |
| gDNA_Solyc11g069220 | <b>CAATTTACTT</b>  | <b>ACATATAAAA</b>  | <b>ATGGTTTGAT</b>  | <b>TTAATTTTTG</b> | <b>GTGCAGGGTT</b>   | 6050 |
| cDNA_Solyc11g069220 | -----              | -----              | -----              | -----             | ----- <b>GTT</b>    | 1068 |
| SIMLO8_LEAF         | -----              | -----              | -----              | -----             | ----- <b>GTT</b>    | 1233 |
|                     | 6,060              |                    | 6,080              |                   | 6,100               |      |
| gDNA_Solyc11g069220 | <b>CTTATTCAGA</b>  | <b>TTCTTTGCAG</b>  | <b>CTATGTTACT</b>  | <b>CTTCCATTAT</b> | <b>ATGCTCTTGT</b>   | 6100 |
| cDNA_Solyc11g069220 | <b>CTTATTCAGA</b>  | <b>TTCTTTGCAG</b>  | <b>CTATGTTACT</b>  | <b>CTTCCATTAT</b> | <b>ATGCTCTTGT</b>   | 1118 |
| SIMLO8_LEAF         | <b>CTTATTCAGA</b>  | <b>TTCTTTGCAG</b>  | <b>CTATGTTACT</b>  | <b>CTTCCATTAT</b> | <b>ATGCTCTTGT</b>   | 1283 |
|                     |                    | 6,120              |                    | 6,140             |                     |      |
| gDNA_Solyc11g069220 | <b>AACACAGGTA</b>  | <b>AATTAAGTTA</b>  | <b>TATATATCGT</b>  | <b>CAACGTAAAT</b> | <b>TTTTGTTTTT</b>   | 6150 |
| cDNA_Solyc11g069220 | <b>AACACAG</b>     | -----              | -----              | -----             | -----               | 1125 |
| SIMLO8_LEAF         | <b>AACACAG</b>     | -----              | -----              | -----             | -----               | 1290 |
|                     | 6,160              |                    | 6,180              |                   | 6,200               |      |
| gDNA_Solyc11g069220 | <b>ATCTCATAAG</b>  | <b>ATTACATTTG</b>  | <b>AATATACATC</b>  | <b>TCGTTTTATT</b> | <b>TTTAAGATTA</b>   | 6200 |
| cDNA_Solyc11g069220 | -----              | -----              | -----              | -----             | -----               | 1125 |
| SIMLO8_LEAF         | -----              | -----              | -----              | -----             | -----               | 1290 |
|                     |                    | 6,220              |                    | 6,240             |                     |      |
| gDNA_Solyc11g069220 | <b>TTAATCTCGC</b>  | <b>ATTTTAAGTT</b>  | <b>TCAAGTCACA</b>  | <b>AAAACAATAA</b> | <b>CATAATAATA</b>   | 6250 |
| cDNA_Solyc11g069220 | -----              | -----              | -----              | -----             | -----               | 1125 |
| SIMLO8_LEAF         | -----              | -----              | -----              | -----             | -----               | 1290 |
|                     | 6,260              |                    | 6,280              |                   | 6,300               |      |
| gDNA_Solyc11g069220 | <b>ACGAATATTA</b>  | <b>ACAACCTCCTA</b> | <b>GATATTACGT</b>  | <b>GGGCGTTTGG</b> | <b>ACATAAGAAT</b>   | 6300 |
| cDNA_Solyc11g069220 | -----              | -----              | -----              | -----             | -----               | 1125 |
| SIMLO8_LEAF         | -----              | -----              | -----              | -----             | -----               | 1290 |
|                     |                    | 6,320              |                    | 6,340             |                     |      |
| gDNA_Solyc11g069220 | <b>TTATGTGAAT</b>  | <b>TTTGAAGAA</b>   | <b>AGTAGAATGT</b>  | <b>TTTATTTTCA</b> | <b>AGTTAAAAAT</b>   | 6350 |
| cDNA_Solyc11g069220 | -----              | -----              | -----              | -----             | -----               | 1125 |
| SIMLO8_LEAF         | -----              | -----              | -----              | -----             | -----               | 1290 |
|                     | 6,360              |                    | 6,380              |                   | 6,400               |      |
| gDNA_Solyc11g069220 | <b>AATGTTAAGA</b>  | <b>AATTA AAAAT</b> | <b>TGA AATTGTG</b> | <b>TTTGGACACG</b> | <b>AATACAAATT</b>   | 6400 |
| cDNA_Solyc11g069220 | -----              | -----              | -----              | -----             | -----               | 1125 |
| SIMLO8_LEAF         | -----              | -----              | -----              | -----             | -----               | 1290 |
|                     |                    | 6,420              |                    | 6,440             |                     |      |
| gDNA_Solyc11g069220 | <b>GAAGTTGTTT</b>  | <b>CTTTAAACGT</b>  | <b>TCGCGAATGA</b>  | <b>TTTGTAGTGA</b> | <b>AAAATTGTGA</b>   | 6450 |
| cDNA_Solyc11g069220 | -----              | -----              | -----              | -----             | -----               | 1125 |
| SIMLO8_LEAF         | -----              | -----              | -----              | -----             | -----               | 1290 |
|                     | 6,460              |                    | 6,480              |                   | 6,500               |      |
| gDNA_Solyc11g069220 | <b>AAAAATGGAGT</b> | <b>TTCTTTGGAT</b>  | <b>TTCGAAAAAT</b>  | <b>TAAAACAATT</b> | <b>CTACGTTCAA</b>   | 6500 |
| cDNA_Solyc11g069220 | -----              | -----              | -----              | -----             | -----               | 1125 |
| SIMLO8_LEAF         | -----              | -----              | -----              | -----             | -----               | 1290 |
|                     |                    | 6,520              |                    | 6,540             |                     |      |
| gDNA_Solyc11g069220 | <b>ATAATTTTCT</b>  | <b>TCCGAAAAAA</b>  | <b>ATGAAAAC TA</b> | <b>TCCATGGTTA</b> | <b>ACAAACGGAC</b>   | 6550 |
| cDNA_Solyc11g069220 | -----              | -----              | -----              | -----             | -----               | 1125 |
| SIMLO8_LEAF         | -----              | -----              | -----              | -----             | -----               | 1290 |
|                     | 6,560              |                    | 6,580              |                   | 6,600               |      |
| gDNA_Solyc11g069220 | <b>ACTAAAAATT</b>  | <b>CTATCCTTCA</b>  | <b>CTAGAATTTT</b>  | <b>TTTTCCCCAC</b> | <b>ACCTTTATAG</b>   | 6600 |
| cDNA_Solyc11g069220 | -----              | -----              | -----              | -----             | -----               | 1125 |
| SIMLO8_LEAF         | -----              | -----              | -----              | -----             | -----               | 1290 |
|                     |                    | 6,620              |                    | 6,640             |                     |      |
| gDNA_Solyc11g069220 | <b>GAATGAAAAT</b>  | <b>ACTGATAGGA</b>  | <b>TTTTACTTAT</b>  | <b>ATATACTGTC</b> | <b>AGTACTAACT</b>   | 6650 |
| cDNA_Solyc11g069220 | -----              | -----              | -----              | -----             | -----               | 1125 |
| SIMLO8_LEAF         | -----              | -----              | -----              | -----             | -----               | 1290 |
|                     | 6,660              |                    | 6,680              |                   | 6,700               |      |
| gDNA_Solyc11g069220 | <b>ATCTTACCTT</b>  | <b>TCATGTTTTC</b>  | <b>AATTTCAATT</b>  | <b>ATTATGAAAA</b> | <b>TACTGTAAAT</b>   | 6700 |
| cDNA_Solyc11g069220 | -----              | -----              | -----              | -----             | -----               | 1125 |
| SIMLO8_LEAF         | -----              | -----              | -----              | -----             | -----               | 1290 |
|                     |                    | 6,720              |                    | 6,740             |                     |      |
| gDNA_Solyc11g069220 | <b>ATTTAAGTCT</b>  | <b>TGCGATAGCA</b>  | <b>TAAAAATTCT</b>  | <b>TTTACGTTGT</b> | <b>TAGTTCGTAG</b>   | 6750 |
| cDNA_Solyc11g069220 | -----              | -----              | -----              | -----             | -----               | 1125 |
| SIMLO8_LEAF         | -----              | -----              | -----              | -----             | -----               | 1290 |
|                     | 6,760              |                    | 6,780              |                   | 6,800               |      |
| gDNA_Solyc11g069220 | <b>AAATTA AACT</b> | <b>CATTCTCTCA</b>  | <b>AAATGTTTGC</b>  | <b>ACATTTTTTT</b> | <b>TAAAATAGAT</b>   | 6800 |
| cDNA_Solyc11g069220 | -----              | -----              | -----              | -----             | ----- <b>AT</b>     | 1127 |
| SIMLO8_LEAF         | -----              | -----              | -----              | -----             | ----- <b>AT</b>     | 1292 |
|                     |                    | 6,820              |                    | 6,840             |                     |      |
| gDNA_Solyc11g069220 | <b>GGGATCAACA</b>  | <b>ATGAAACCAA</b>  | <b>CAATCTTCAA</b>  | <b>TGAAAGAGTA</b> | <b>GCAA TGGCAT</b>  | 6850 |
| cDNA_Solyc11g069220 | <b>GGGATCAACA</b>  | <b>ATGAAACCAA</b>  | <b>CAATCTTCAA</b>  | <b>TGAAAGAGTA</b> | <b>GCAA TGGCAT</b>  | 1177 |
| SIMLO8_LEAF         | <b>GGGATCAACA</b>  | <b>ATGAAACCAA</b>  | <b>CAATCTTCAA</b>  | <b>TGAAAGAGTA</b> | <b>GCAATGGCAT</b>   | 1342 |
|                     | 6,860              |                    | 6,880              |                   | 6,900               |      |
| gDNA_Solyc11g069220 | <b>TGAGAAAA TG</b> | <b>GCACCA TAGT</b> | <b>GCCAAAAAAC</b>  | <b>ACATCAAAGA</b> | <b>GATCAACAAG</b>   | 6900 |
| cDNA_Solyc11g069220 | <b>TGAGAAAA TG</b> | <b>GCACCA TAGT</b> | <b>GCCAAAAAAC</b>  | <b>ACATCAAAGA</b> | <b>GATCAACAAG</b>   | 1227 |
| SIMLO8_LEAF         | <b>TGAGAAAA TG</b> | <b>GCACCA TAGT</b> | <b>GCCAAAAAAC</b>  | <b>ACATCAAAGA</b> | <b>GATCAACAAG</b>   | 1392 |
|                     |                    | 6,920              |                    | 6,940             |                     |      |
| gDNA_Solyc11g069220 | <b>CAACAC TCAA</b> | <b>ATCCAACAAC</b>  | <b>ACCAA TGTCA</b> | <b>AGTAGGCCAC</b> | <b>CAAC TCCG TC</b> | 6950 |
| cDNA_Solyc11g069220 | <b>CAACAC TCAA</b> | <b>ATCCAACAAC</b>  | <b>ACCAA TGTCA</b> | <b>AGTAGGCCAC</b> | <b>CAAC TCCG TC</b> | 1277 |
| SIMLO8_LEAF         | <b>CAACAC TCAA</b> | <b>ATCCAACAAC</b>  | <b>ACCAA TGTCA</b> | <b>AGTAGGCCAC</b> | <b>CAAC TCCG TC</b> | 1442 |
|                     | 6,960              |                    | 6,980              |                   | 7,000               |      |
| gDNA_Solyc11g069220 | <b>TCACGGCATG</b>  | <b>TCACCCGTCC</b>  | <b>ATCTCCTACG</b>  | <b>CGGTATCAGG</b> | <b>ACGAGTGACA</b>   | 7000 |
| cDNA_Solyc11g069220 | <b>TCACGGCATG</b>  | <b>TCACCCGTCC</b>  | <b>ATCTCCTACG</b>  | <b>CGGTATCAGG</b> | <b>ACGAGTGACA</b>   | 1327 |
| SIMLO8_LEAF         | <b>TCACGGCATG</b>  | <b>TCACCCGTCC</b>  | <b>ATCTCCTACG</b>  | <b>CGGTATCAGG</b> | <b>ACGAGTGACA</b>   | 1492 |

|                     |                    |                   |                   |                   |                        |
|---------------------|--------------------|-------------------|-------------------|-------------------|------------------------|
|                     |                    | 7,020             |                   | 7,040             |                        |
|                     |                    |                   |                   |                   |                        |
| gDNA_Solyc11g069220 | <b>TGGACG TGGG</b> | <b>TCCACGAAGA</b> | <b>TCGAGTTATA</b> | <b>ATAATATAGA</b> | <b>CCATTGGGAT</b> 7050 |
| cDNA_Solyc11g069220 | <b>TGGACG TGGG</b> | <b>TCCACGAAGA</b> | <b>TCGAGTTATA</b> | <b>ATAATATAGA</b> | <b>CCATTGGGAT</b> 1377 |
| SIMLO8_LEAF         | <b>TGGACG TGGG</b> | <b>TCCACGAAGA</b> | <b>TCGAGTTATA</b> | <b>ATAATATAGA</b> | <b>CCATTGGGAT</b> 1542 |
|                     | 7,060              |                   | 7,080             |                   | 7,100                  |
|                     |                    |                   |                   |                   |                        |
| gDNA_Solyc11g069220 | <b>ATTGAGGGCT</b>  | <b>CACCATCTCC</b> | <b>AAATCGTCAC</b> | <b>GACTCTGAAG</b> | <b>TTCACGAGCC</b> 7100 |
| cDNA_Solyc11g069220 | <b>ATTGAGGGCT</b>  | <b>CACCATCTCC</b> | <b>AAATCGTCAC</b> | <b>GACTCTGAAG</b> | <b>TTCACGAGCC</b> 1427 |
| SIMLO8_LEAF         | <b>ATTGAGGGCT</b>  | <b>CACCATCTCC</b> | <b>AAATCGTCAC</b> | <b>GACTCTGAAG</b> | <b>TTCACGAGCC</b> 1592 |
|                     |                    | 7,120             |                   | 7,140             |                        |
|                     |                    |                   |                   |                   |                        |
| gDNA_Solyc11g069220 | <b>TAATTTGTCA</b>  | <b>GAAATTGAGG</b> | <b>CTCGTGAACA</b> | <b>ATACGAGATT</b> | <b>AATATTGCTC</b> 7150 |
| cDNA_Solyc11g069220 | <b>TAATTTGTCA</b>  | <b>GAAATTGAGG</b> | <b>CTCGTGAACA</b> | <b>ATACGAGATT</b> | <b>AATATTGCTC</b> 1477 |
| SIMLO8_LEAF         | <b>TAATTTGTCA</b>  | <b>GAAATTGAGG</b> | <b>CTCGTGAACA</b> | <b>ATACGAGATT</b> | <b>AATATTGCTC</b> 1642 |
|                     | 7,160              |                   | 7,180             |                   |                        |
|                     |                    |                   |                   |                   |                        |
| gDNA_Solyc11g069220 | <b>GTTCAAGGGA</b>  | <b>TTTTTCTTTT</b> | <b>GATAAAAGAA</b> | <b>CGACTAGTGT</b> | <b>ATAA</b> » 7194     |
| cDNA_Solyc11g069220 | <b>GTTCAAGGGA</b>  | <b>TTTTTCTTTT</b> | <b>GATAAAAGAA</b> | <b>CGACTAGTGT</b> | <b>ATAA</b> » 1521     |
| SIMLO8_LEAF         | <b>GTTCAAGGGA</b>  | <b>TTTTTCTTTT</b> | <b>GATAAAAGAA</b> | <b>CGACTAGTGT</b> | <b>ATAA</b> » 1686     |

|                     |                    |                   |                   |                   |                   |     |
|---------------------|--------------------|-------------------|-------------------|-------------------|-------------------|-----|
|                     |                    |                   | 20                |                   | 40                |     |
| gDNA_Solyc06g082820 | <b>«CATTTTTCTC</b> | <b>TGTTTCATT</b>  | <b>CATTAATTAA</b> | <b>TTTTATCATA</b> | <b>TTTGCCTAAT</b> | 50  |
| cDNA_Solyc06g082820 | «-----             | -----             | -----             | -----             | -----             | -   |
| SIMLO9_LEAF         | «-----             | -----             | -----             | -----             | -----             | -   |
| SIMLO9_FLOWER       | «-----             | -----             | -----             | -----             | -----             | -   |
| SIMLO9_FRUIT        | «-----             | -----             | -----             | -----             | -----             | -   |
|                     | 60                 |                   | 80                |                   | 100               |     |
| gDNA_Solyc06g082820 | <b>CCATGAAATA</b>  | <b>ATTTACCAA</b>  | <b>ACTTAAACAG</b> | <b>GAGAAAATAA</b> | <b>TAATAATAAT</b> | 100 |
| cDNA_Solyc06g082820 | -----              | -----             | -----             | -----             | -----             | -   |
| SIMLO9_LEAF         | -----              | -----             | -----             | -----             | -----             | -   |
| SIMLO9_FLOWER       | -----              | -----             | -----             | -----             | -----             | -   |
| SIMLO9_FRUIT        | -----              | -----             | -----             | -----             | -----             | -   |
|                     | 120                |                   | 140               |                   |                   |     |
| gDNA_Solyc06g082820 | <b>ATATGGAGGG</b>  | <b>AGGTGGAGAG</b> | <b>GAAGAAGGGT</b> | <b>CATTGGAATA</b> | <b>TACACCAACA</b> | 150 |
| cDNA_Solyc06g082820 | --ATGGAGGG         | AGGTGGAGAG        | GAAGAAGGGT        | CATTGGAATA        | TACACCAACA        | 48  |
| SIMLO9_LEAF         | --A-----           | -----             | -----             | -----             | -----             | 1   |
| SIMLO9_FLOWER       | --ATGGAGGG         | AGGTGGAGAG        | GAAGAAGGGT        | CATTGGAATA        | TACACCAACA        | 48  |
| SIMLO9_FRUIT        | --ATGGAGGG         | AGGTGGAGAG        | GAAGAAGGGT        | CATTGGAATA        | TACACCAACA        | 48  |
|                     | 160                |                   | 180               |                   | 200               |     |
| gDNA_Solyc06g082820 | <b>TGGGTGGTTG</b>  | <b>CTGCTGTATG</b> | <b>CACAGTCATT</b> | <b>GTTTCTATT</b>  | <b>CTCTTCTTGT</b> | 200 |
| cDNA_Solyc06g082820 | TGGGTGGTTG         | CTGCTGTATG        | CACAGTCATT        | GTTTCTATT         | CTCTTCTTGT        | 98  |
| SIMLO9_LEAF         | -----              | -----             | -----             | -----             | -----             | 1   |
| SIMLO9_FLOWER       | TGGGTGGTTG         | CTGCTGTATG        | CACAGTCATT        | GTTTCTATT         | CTCTTCTTGT        | 98  |
| SIMLO9_FRUIT        | TGGGTGGTTG         | CTGCTGTATG        | CACAGTCATT        | GTTTCTATT         | CTCTTCTTGT        | 98  |
|                     | 220                |                   | 240               |                   |                   |     |
| gDNA_Solyc06g082820 | <b>TGAACGTCTC</b>  | <b>ATCCATTACG</b> | <b>CTGGCAAGGT</b> | <b>ATATATATAT</b> | <b>ATATATATAT</b> | 250 |
| cDNA_Solyc06g082820 | TGAACGTCTC         | ATCCA TTACG       | CTGGCAAG          | -----             | -----             | 126 |
| SIMLO9_LEAF         | -----              | -----             | -----             | -----             | -----             | 2   |
| SIMLO9_FLOWER       | TGAACGTCTC         | ATCCA TTACG       | CTGGCAAG          | -----             | -----             | 126 |
| SIMLO9_FRUIT        | TGAACGTCTC         | ATCCA TTACG       | CTGGCAAG          | -----             | -----             | 126 |
|                     | 260                |                   | 280               |                   | 300               |     |
| gDNA_Solyc06g082820 | <b>ATTTTTTTTT</b>  | <b>TTTTCTGTTT</b> | <b>TTTAAAAAAA</b> | <b>TTATAATTAT</b> | <b>TTATCATATG</b> | 300 |
| cDNA_Solyc06g082820 | -----              | -----             | -----             | -----             | -----             | 126 |
| SIMLO9_LEAF         | -----              | -----             | -----             | -----             | -----             | 2   |
| SIMLO9_FLOWER       | -----              | -----             | -----             | -----             | -----             | 126 |
| SIMLO9_FRUIT        | -----              | -----             | -----             | -----             | -----             | 126 |
|                     | 320                |                   | 340               |                   |                   |     |
| gDNA_Solyc06g082820 | <b>AATGTGCAAT</b>  | <b>ATGGTTATAT</b> | <b>AAAAGATTTT</b> | <b>CTCGAAAATG</b> | <b>CAGGATAAGA</b> | 350 |
| cDNA_Solyc06g082820 | -----              | -----             | -----             | -----             | -----             | 126 |
| SIMLO9_LEAF         | -----              | -----             | -----             | -----             | -----             | 2   |
| SIMLO9_FLOWER       | -----              | -----             | -----             | -----             | -----             | 126 |
| SIMLO9_FRUIT        | -----              | -----             | -----             | -----             | -----             | 126 |
|                     | 360                |                   | 380               |                   | 400               |     |
| gDNA_Solyc06g082820 | <b>TTTTGTACTT</b>  | <b>GTAATGTGCG</b> | <b>TAGCTGAAGC</b> | <b>TTAGTGCACG</b> | <b>TAGTTTTTTT</b> | 400 |
| cDNA_Solyc06g082820 | -----              | -----             | -----             | -----             | -----             | 126 |
| SIMLO9_LEAF         | -----              | -----             | -----             | -----             | -----             | 2   |
| SIMLO9_FLOWER       | -----              | -----             | -----             | -----             | -----             | 126 |
| SIMLO9_FRUIT        | -----              | -----             | -----             | -----             | -----             | 126 |
|                     | 420                |                   | 440               |                   |                   |     |
| gDNA_Solyc06g082820 | <b>TTCTTAAAG</b>   | <b>AGTTTATTGG</b> | <b>TATTTCTATG</b> | <b>AAAACAACAA</b> | <b>ATAAATAACA</b> | 450 |
| cDNA_Solyc06g082820 | -----              | -----             | -----             | -----             | -----             | 126 |
| SIMLO9_LEAF         | -----              | -----             | -----             | -----             | -----             | 2   |
| SIMLO9_FLOWER       | -----              | -----             | -----             | -----             | -----             | 126 |
| SIMLO9_FRUIT        | -----              | -----             | -----             | -----             | -----             | 126 |
|                     | 460                |                   | 480               |                   | 500               |     |
| gDNA_Solyc06g082820 | <b>TGCATTTTAT</b>  | <b>TGTCATGTTT</b> | <b>GAATCTGTCT</b> | <b>ATTGTTAAGA</b> | <b>AATCAATGTC</b> | 500 |
| cDNA_Solyc06g082820 | -----              | -----             | -----             | -----             | -----             | 126 |
| SIMLO9_LEAF         | -----              | -----             | -----             | -----             | -----             | 2   |
| SIMLO9_FLOWER       | -----              | -----             | -----             | -----             | -----             | 126 |
| SIMLO9_FRUIT        | -----              | -----             | -----             | -----             | -----             | 126 |
|                     | 520                |                   | 540               |                   |                   |     |
| gDNA_Solyc06g082820 | <b>TTATGAAAT</b>   | <b>ATAATGTCTT</b> | <b>TGTTTTCTCT</b> | <b>CTATTTCTGG</b> | <b>ATGACAGTTG</b> | 550 |
| cDNA_Solyc06g082820 | -----              | -----             | -----             | -----             | -----             | 126 |
| SIMLO9_LEAF         | -----              | -----             | -----             | -----             | -----             | 2   |
| SIMLO9_FLOWER       | -----              | -----             | -----             | -----             | -----             | 126 |
| SIMLO9_FRUIT        | -----              | -----             | -----             | -----             | -----             | 126 |
|                     | 560                |                   | 580               |                   | 600               |     |
| gDNA_Solyc06g082820 | <b>GTTTGGAGGA</b>  | <b>TGGTTATCCA</b> | <b>CCTGGGATCG</b> | <b>ATCCTTCTCA</b> | <b>ATGACTTCTG</b> | 600 |
| cDNA_Solyc06g082820 | -----              | -----             | -----             | -----             | -----             | 126 |
| SIMLO9_LEAF         | -----              | -----             | -----             | -----             | -----             | 2   |
| SIMLO9_FLOWER       | -----              | -----             | -----             | -----             | -----             | 126 |
| SIMLO9_FRUIT        | -----              | -----             | -----             | -----             | -----             | 126 |
|                     | 620                |                   | 640               |                   |                   |     |
| gDNA_Solyc06g082820 | <b>AGTTGAATTT</b>  | <b>GTCGCATAGG</b> | <b>ACAAGCCTGA</b> | <b>TACGGTTTTT</b> | <b>TACATATAGT</b> | 650 |
| cDNA_Solyc06g082820 | -----              | -----             | -----             | -----             | -----             | 126 |
| SIMLO9_LEAF         | -----              | -----             | -----             | -----             | -----             | 2   |
| SIMLO9_FLOWER       | -----              | -----             | -----             | -----             | -----             | 126 |
| SIMLO9_FRUIT        | -----              | -----             | -----             | -----             | -----             | 126 |
|                     | 660                |                   | 680               |                   | 700               |     |
| gDNA_Solyc06g082820 | <b>GTTTCATCACA</b> | <b>AGGGCAGAGA</b> | <b>GAAAAAATAA</b> | <b>ATTGATTTTC</b> | <b>AACATTTGAC</b> | 700 |
| cDNA_Solyc06g082820 | -----              | -----             | -----             | -----             | -----             | 126 |
| SIMLO9_LEAF         | -----              | -----             | -----             | -----             | -----             | 2   |
| SIMLO9_FLOWER       | -----              | -----             | -----             | -----             | -----             | 126 |
| SIMLO9_FRUIT        | -----              | -----             | -----             | -----             | -----             | 126 |

|                     |                                                                |       |  |       |      |
|---------------------|----------------------------------------------------------------|-------|--|-------|------|
|                     |                                                                | 720   |  | 740   |      |
| gDNA_Solyc06g082820 | <b>TAAGATTCCA TCATTTTATT TTTCTTTTC AATTCGCCA TGTTATGAA</b>     |       |  |       | 750  |
| cDNA_Solyc06g082820 | -----                                                          |       |  |       | 126  |
| SIMLO9_LEAF         | -----                                                          |       |  |       | 2    |
| SIMLO9_FLOWER       | -----                                                          |       |  |       | 126  |
| SIMLO9_FRUIT        | -----                                                          |       |  |       | 126  |
|                     |                                                                | 760   |  | 800   |      |
| gDNA_Solyc06g082820 | <b>CGGTTTACAA GTGGAATGGT ATAAGGAATT CATATAGCGG ATCTGAACTT</b>  |       |  |       | 800  |
| cDNA_Solyc06g082820 | -----                                                          |       |  |       | 126  |
| SIMLO9_LEAF         | -----                                                          |       |  |       | 2    |
| SIMLO9_FLOWER       | -----                                                          |       |  |       | 126  |
| SIMLO9_FRUIT        | -----                                                          |       |  |       | 126  |
|                     |                                                                | 820   |  | 840   |      |
| gDNA_Solyc06g082820 | <b>GTTATTATTG ATCGTTGTTG GTTTGTTCAA GTTTCATTAT TTTATTATAG</b>  |       |  |       | 850  |
| cDNA_Solyc06g082820 | -----                                                          |       |  |       | 126  |
| SIMLO9_LEAF         | -----                                                          |       |  |       | 2    |
| SIMLO9_FLOWER       | -----                                                          |       |  |       | 126  |
| SIMLO9_FRUIT        | -----                                                          |       |  |       | 126  |
|                     |                                                                | 860   |  | 900   |      |
| gDNA_Solyc06g082820 | <b>ATGCAACCAA TACGTAGCTT AGCAACATAG AGTGAAGGT GGTCCGTTAA</b>   |       |  |       | 900  |
| cDNA_Solyc06g082820 | -----                                                          |       |  |       | 126  |
| SIMLO9_LEAF         | -----                                                          |       |  |       | 2    |
| SIMLO9_FLOWER       | -----                                                          |       |  |       | 126  |
| SIMLO9_FRUIT        | -----                                                          |       |  |       | 126  |
|                     |                                                                | 920   |  | 940   |      |
| gDNA_Solyc06g082820 | <b>ACATACTTCA TAGGAAAATC ATACTATATT AATTAGGTAT ATAGGTCAAT</b>  |       |  |       | 950  |
| cDNA_Solyc06g082820 | -----                                                          |       |  |       | 126  |
| SIMLO9_LEAF         | -----                                                          |       |  |       | 2    |
| SIMLO9_FLOWER       | -----                                                          |       |  |       | 126  |
| SIMLO9_FRUIT        | -----                                                          |       |  |       | 126  |
|                     |                                                                | 960   |  | 1,000 |      |
| gDNA_Solyc06g082820 | <b>TATTTTCATA CATGTATATG TATATATATG TATTGAACTT TGAACATTCT</b>  |       |  |       | 1000 |
| cDNA_Solyc06g082820 | -----                                                          |       |  |       | 126  |
| SIMLO9_LEAF         | -----                                                          |       |  |       | 2    |
| SIMLO9_FLOWER       | -----                                                          |       |  |       | 126  |
| SIMLO9_FRUIT        | -----                                                          |       |  |       | 126  |
|                     |                                                                | 1,020 |  | 1,040 |      |
| gDNA_Solyc06g082820 | <b>TAACGAAATC TCTGGCTCTG CTA CTGTTG CAGCGTCTGA AGAAGAAGAA</b>  |       |  |       | 1050 |
| cDNA_Solyc06g082820 | -----                                                          |       |  |       | 143  |
| SIMLO9_LEAF         | -----                                                          |       |  |       | 19   |
| SIMLO9_FLOWER       | -----                                                          |       |  |       | 143  |
| SIMLO9_FRUIT        | -----                                                          |       |  |       | 143  |
|                     |                                                                | 1,060 |  | 1,100 |      |
| gDNA_Solyc06g082820 | <b>ACAAAAGCA T CTGTATGAAG CCC TACAGAA AGTTAAAGAA GGTTCAAAA</b> |       |  |       | 1100 |
| cDNA_Solyc06g082820 | -----                                                          |       |  |       | 184  |
| SIMLO9_LEAF         | -----                                                          |       |  |       | 60   |
| SIMLO9_FLOWER       | -----                                                          |       |  |       | 184  |
| SIMLO9_FRUIT        | -----                                                          |       |  |       | 184  |
|                     |                                                                | 1,120 |  | 1,140 |      |
| gDNA_Solyc06g082820 | <b>TATAACAAT TGATCAATTA AGGTTGTATT TATATATGAA CTATTTTGTG</b>   |       |  |       | 1150 |
| cDNA_Solyc06g082820 | -----                                                          |       |  |       | 184  |
| SIMLO9_LEAF         | -----                                                          |       |  |       | 60   |
| SIMLO9_FLOWER       | -----                                                          |       |  |       | 184  |
| SIMLO9_FRUIT        | -----                                                          |       |  |       | 184  |
|                     |                                                                | 1,160 |  | 1,200 |      |
| gDNA_Solyc06g082820 | <b>AATGTGTATT ATGTGCAGAG TTGATGCTGT TGGGGTTTAT TTCTCTGCTG</b>  |       |  |       | 1200 |
| cDNA_Solyc06g082820 | -----                                                          |       |  |       | 216  |
| SIMLO9_LEAF         | -----                                                          |       |  |       | 92   |
| SIMLO9_FLOWER       | -----                                                          |       |  |       | 216  |
| SIMLO9_FRUIT        | -----                                                          |       |  |       | 216  |
|                     |                                                                | 1,220 |  | 1,240 |      |
| gDNA_Solyc06g082820 | <b>TAAACAGTAT TTCAAAGTCG TATTGTTGAA ATCTGTGTGC CTCCTCATGT</b>  |       |  |       | 1250 |
| cDNA_Solyc06g082820 | -----                                                          |       |  |       | 266  |
| SIMLO9_LEAF         | -----                                                          |       |  |       | 142  |
| SIMLO9_FLOWER       | -----                                                          |       |  |       | 266  |
| SIMLO9_FRUIT        | -----                                                          |       |  |       | 266  |
|                     |                                                                | 1,260 |  | 1,300 |      |
| gDNA_Solyc06g082820 | <b>TGTAACACAC TTGCTTCCCT GTGCGTTACC GTTGGAGCAT ACTTCATTTT</b>  |       |  |       | 1300 |
| cDNA_Solyc06g082820 | -----                                                          |       |  |       | 316  |
| SIMLO9_LEAF         | -----                                                          |       |  |       | 192  |
| SIMLO9_FLOWER       | -----                                                          |       |  |       | 316  |
| SIMLO9_FRUIT        | -----                                                          |       |  |       | 316  |
|                     |                                                                | 1,320 |  | 1,340 |      |
| gDNA_Solyc06g082820 | <b>CACCTCCAAC TCCAAC TCCA ACTCTAACTC CACCTCCGCC TCACAAAGAG</b> |       |  |       | 1350 |
| cDNA_Solyc06g082820 | -----                                                          |       |  |       | 366  |
| SIMLO9_LEAF         | -----                                                          |       |  |       | 242  |
| SIMLO9_FLOWER       | -----                                                          |       |  |       | 366  |
| SIMLO9_FRUIT        | -----                                                          |       |  |       | 366  |
|                     |                                                                | 1,360 |  | 1,400 |      |
| gDNA_Solyc06g082820 | <b>CCTCAGGTTA ACAATCAGGC GGTTCACTAT CATGCTGGTC CTCACCATCA</b>  |       |  |       | 1400 |
| cDNA_Solyc06g082820 | -----                                                          |       |  |       | 416  |
| SIMLO9_LEAF         | -----                                                          |       |  |       | 292  |
| SIMLO9_FLOWER       | -----                                                          |       |  |       | 416  |
| SIMLO9_FRUIT        | -----                                                          |       |  |       | 416  |

|                     |                        |             |             |             |               |      |
|---------------------|------------------------|-------------|-------------|-------------|---------------|------|
|                     |                        | 1,420       |             | 1,440       |               |      |
| gDNA_Solyc06g082820 | ACGGCA TTTG CTTGAAGAAG | AAACAA TGTC | AGCTGAGGGT  | TACTGCCGTC  | 1450          |      |
| cDNA_Solyc06g082820 | ACGGCA TTTG CTTGAAGAAG | AAACAA TGTC | AGCTGAGGGT  | TACTGCCGTC  | 466           |      |
| SIMLO9_LEAF         | ACGGCA TTTG CTTGAAGAAG | AAACAA TGTC | AGCTGAGGGT  | TACTGCCGTC  | 342           |      |
| SIMLO9_FLOWER       | ACGGCA TTTG CTTGAAGAAG | AAACAA TGTC | AGCTGAGGGT  | TACTGCCGTC  | 466           |      |
| SIMLO9_FRUIT        | ACGGCA TTTG CTTGAAGAAG | AAACAA TGTC | AGCTGAGGGT  | TACTGCCGTC  | 466           |      |
|                     | 1,460                  | 1,480       | 1,500       |             |               |      |
| gDNA_Solyc06g082820 | ATAAAGTACT TAAGTCATTG  | CTCTTAACCT  | CCAGCTATAT  | ACTTTGTGTT  | 1500          |      |
| cDNA_Solyc06g082820 | ATAAA-----             | -----       | -----       | -----       | 471           |      |
| SIMLO9_LEAF         | ATAAA-----             | -----       | -----       | -----       | 347           |      |
| SIMLO9_FLOWER       | ATAAA-----             | -----       | -----       | -----       | 471           |      |
| SIMLO9_FRUIT        | ATAAA-----             | -----       | -----       | -----       | 471           |      |
|                     | 1,520                  | 1,540       |             |             |               |      |
| gDNA_Solyc06g082820 | GCGGATGTTT             | TGTTATATCT  | GTTTCTTGTT  | AGTTTGCAAG  | TTACGAGTTT    | 1550 |
| cDNA_Solyc06g082820 | -----                  | -----       | -----       | -----       | -----         | 471  |
| SIMLO9_LEAF         | -----                  | -----       | -----       | -----       | -----         | 347  |
| SIMLO9_FLOWER       | -----                  | -----       | -----       | -----       | -----         | 471  |
| SIMLO9_FRUIT        | -----                  | -----       | -----       | -----       | -----         | 471  |
|                     | 1,560                  | 1,580       | 1,600       |             |               |      |
| gDNA_Solyc06g082820 | GCGAGAATCC             | AGTAACTTTG  | GCTGCACCTT  | TTTCCTTTTA  | TGTTTGACAA    | 1600 |
| cDNA_Solyc06g082820 | -----                  | -----       | -----       | -----       | -----         | 471  |
| SIMLO9_LEAF         | -----                  | -----       | -----       | -----       | -----         | 347  |
| SIMLO9_FLOWER       | -----                  | -----       | -----       | -----       | -----         | 471  |
| SIMLO9_FRUIT        | -----                  | -----       | -----       | -----       | -----         | 471  |
|                     | 1,620                  | 1,640       |             |             |               |      |
| gDNA_Solyc06g082820 | TATGACTTCA             | AACATTGGTG  | TTTACTTCTT  | ATATAATACT  | TTCCGTTGTT    | 1650 |
| cDNA_Solyc06g082820 | -----                  | -----       | -----       | -----       | -----         | 471  |
| SIMLO9_LEAF         | -----                  | -----       | -----       | -----       | -----         | 347  |
| SIMLO9_FLOWER       | -----                  | -----       | -----       | -----       | -----         | 471  |
| SIMLO9_FRUIT        | -----                  | -----       | -----       | -----       | -----         | 471  |
|                     | 1,660                  | 1,680       | 1,700       |             |               |      |
| gDNA_Solyc06g082820 | TTTACAGAAC             | AAGGTTCCGT  | TACTATCTCT  | TGAGGCGTTG  | CATCACCTTC    | 1700 |
| cDNA_Solyc06g082820 | -----AAC               | AAGGTTCCGT  | TACTATCTCT  | TGAGGCGTTG  | CATCACCTTC    | 514  |
| SIMLO9_LEAF         | -----AAC               | AAGGTTCCGT  | TACTATCTCT  | TGAGGCGTTG  | CATCACCTTC    | 390  |
| SIMLO9_FLOWER       | -----AAC               | AAGGTTCCGT  | TACTATCTCT  | TGAGGCGTTG  | CATCACCTTC    | 514  |
| SIMLO9_FRUIT        | -----AAC               | AAGGTTCCGT  | TACTATCTCT  | TGAGGCGTTG  | CATCACCTTC    | 514  |
|                     | 1,720                  | 1,740       |             |             |               |      |
| gDNA_Solyc06g082820 | ATGTTTTTAT             | ATTTGTCCTA  | GCTATTGTGC  | ATGTGACATT  | CTCTGTTTTG    | 1750 |
| cDNA_Solyc06g082820 | ATGTTTTTAT             | ATTTGTCCTA  | GCTATTGTGC  | ATGTGACATT  | CTCTGTTTTG    | 564  |
| SIMLO9_LEAF         | ATGTTTTTAT             | ATTTGTCCTA  | GCTATTGTGC  | ATGTGACATT  | CTCTGTTTTG    | 440  |
| SIMLO9_FLOWER       | ATGTTTTTAT             | ATTTGTCCTA  | GCTATTGTGC  | ATGTGACATT  | CTCTGTTTTG    | 564  |
| SIMLO9_FRUIT        | ATGTTTTTAT             | ATTTGTCCTA  | GCTATTGTGC  | ATGTGACATT  | CTCTGTTTTG    | 564  |
|                     | 1,760                  | 1,780       | 1,800       |             |               |      |
| gDNA_Solyc06g082820 | ACTATTGTAT             | TTGGAGGAGC  | AAAGGTGAGA  | GTTACTAAGC  | TTTTCTGCTT    | 1800 |
| cDNA_Solyc06g082820 | ACTATTGTAT             | TTGGAGGAGC  | AAAG-----   | -----       | -----         | 588  |
| SIMLO9_LEAF         | ACTATTGTAT             | TTGGAGGAGC  | AAAG-----   | -----       | -----         | 464  |
| SIMLO9_FLOWER       | ACTATTGTAT             | TTGGAGGAGC  | AAAG-----   | -----       | -----         | 588  |
| SIMLO9_FRUIT        | ACTATTGTAT             | TTGGAGGAGC  | AAAG-----   | -----       | -----         | 588  |
|                     | 1,820                  | 1,840       |             |             |               |      |
| gDNA_Solyc06g082820 | GAGTTTCTTT             | TACTTTGTCT  | TTCCGGCTGA  | TTCATTGTTT  | GTGAATGTTT    | 1850 |
| cDNA_Solyc06g082820 | -----                  | -----       | -----       | -----       | -----         | 588  |
| SIMLO9_LEAF         | -----                  | -----       | -----       | -----       | -----         | 464  |
| SIMLO9_FLOWER       | -----                  | -----       | -----       | -----       | -----         | 588  |
| SIMLO9_FRUIT        | -----                  | -----       | -----       | -----       | -----         | 588  |
|                     | 1,860                  | 1,880       | 1,900       |             |               |      |
| gDNA_Solyc06g082820 | TAATAATGGC             | CTAGATACGT  | CAATGGAAGC  | AATGGGAGGA  | TGCAATCGTA    | 1900 |
| cDNA_Solyc06g082820 | -----                  | ATACGT      | CAATGGAAGC  | AA TGGGAGGA | TGCAATCGTA    | 624  |
| SIMLO9_LEAF         | -----                  | ATACGT      | CAATGGAAGC  | AA TGGGAGGA | TGCAATCGTA    | 500  |
| SIMLO9_FLOWER       | -----                  | ATACGT      | CAATGGAAGC  | AA TGGGAGGA | TGCAATCGTA    | 624  |
| SIMLO9_FRUIT        | -----                  | ATACGT      | CAATGGAAGC  | AA TGGGAGGA | TGCAATCGTA    | 624  |
|                     | 1,920                  | 1,940       |             |             |               |      |
| gDNA_Solyc06g082820 | AAAGATGATT             | ATGAATCCGA  | AGA TGGTATG | ACTAAA TAGG | AAAGGAA TTA   | 1950 |
| cDNA_Solyc06g082820 | AAAGATGATT             | ATGAATCCGA  | AGATG-----  | -----       | -----         | 649  |
| SIMLO9_LEAF         | AAAGATGATT             | ATGAATCCGA  | AGATG-----  | -----       | -----         | 525  |
| SIMLO9_FLOWER       | AAAGATGATT             | ATGAATCCGA  | AGATG-----  | -----       | -----         | 649  |
| SIMLO9_FRUIT        | AAAGATGATT             | ATGAATCCGA  | AGATG-----  | -----       | -----         | 649  |
|                     | 1,960                  | 1,980       | 2,000       |             |               |      |
| gDNA_Solyc06g082820 | AGTAAACGGT             | TGAAATGTAA  | AGCTACTAGT  | AATATTGGTA  | TTCCATTTTG    | 2000 |
| cDNA_Solyc06g082820 | -----                  | -----       | -----       | -----       | -----         | 649  |
| SIMLO9_LEAF         | -----                  | -----       | -----       | -----       | -----         | 525  |
| SIMLO9_FLOWER       | -----                  | -----       | -----       | -----       | -----         | 649  |
| SIMLO9_FRUIT        | -----                  | -----       | -----       | -----       | -----         | 649  |
|                     | 2,020                  | 2,040       |             |             |               |      |
| gDNA_Solyc06g082820 | CAGCTCATT              | GAAGCCAACA  | GTTACTCATG  | TCTTTGAACA  | TGATTTTCATC   | 2050 |
| cDNA_Solyc06g082820 | ---CTCATT              | GAAGCCAACA  | GTTACTCATG  | TCTTTGAACA  | TGATTTTCATC   | 696  |
| SIMLO9_LEAF         | ---CTCATT              | GAAGCCAACA  | GTTACTCATG  | TCTTTGAACA  | TGATTTTCATC   | 572  |
| SIMLO9_FLOWER       | ---CTCATT              | GAAGCCAACA  | GTTACTCATG  | TCTTTGAACA  | TGATTTTCATC   | 696  |
| SIMLO9_FRUIT        | ---CTCATT              | GAAGCCAACA  | GTTACTCATG  | TCTTTGAACA  | TGATTTTCATC   | 696  |
|                     | 2,060                  | 2,080       | 2,100       |             |               |      |
| gDNA_Solyc06g082820 | AGGAA TCGT             | TTCAGGGTAT  | GGGTACACAA  | TCAGCCA TTT | TGGG T TGGG T | 2100 |
| cDNA_Solyc06g082820 | AGGAA TCGT             | TTCAGGGTAT  | GGGTACACAA  | TCAGCCA TTT | TGGG T TGGG T | 746  |
| SIMLO9_LEAF         | AGGAA TCGT             | TTCAGGGTAT  | GGGTACACAA  | TCAGCCA TTT | TGGG T TGGG T | 622  |
| SIMLO9_FLOWER       | AGGAA TCGT             | TTCAGGGTAT  | GGGTACACAA  | TCAGCCA TTT | TGGG T TGGG T | 746  |
| SIMLO9_FRUIT        | AGGAA TCGT             | TTCAGGGTAT  | GGGTACACAA  | TCAGCCA TTT | TGGG T TGGG T | 746  |

|                     |                    |                    |                    |                      |                     |
|---------------------|--------------------|--------------------|--------------------|----------------------|---------------------|
|                     |                    | 2,120              |                    | 2,140                |                     |
| gDNA_Solyc06g082820 | <b>GGTAAGCACC</b>  | <b>CCCATTCTCC</b>  | <b>GCGAACAAATA</b> | <b>TGGAATCTTT</b>    | <b>GTATTTCCAT</b>   |
| cDNA_Solyc06g082820 | -----              | -----              | -----              | -----                | -----               |
| SIMLO9_LEAF         | -----              | -----              | -----              | -----                | -----               |
| SIMLO9_FLOWER       | -----              | -----              | -----              | -----                | -----               |
| SIMLO9_FRUIT        | -----              | -----              | -----              | -----                | -----               |
|                     | 2,160              |                    | 2,180              |                      | 2,200               |
| gDNA_Solyc06g082820 | <b>ATGTGCCAAA</b>  | <b>AAACAAAAAA</b>  | <b>ACTTCTGTTG</b>  | <b>TGTGATTGTT</b>    | <b>TTGACATATG</b>   |
| cDNA_Solyc06g082820 | -----              | -----              | -----              | -----                | -----               |
| SIMLO9_LEAF         | -----              | -----              | -----              | -----                | -----               |
| SIMLO9_FLOWER       | -----              | -----              | -----              | -----                | -----               |
| SIMLO9_FRUIT        | -----              | -----              | -----              | -----                | -----               |
|                     | 2,220              |                    | 2,240              |                      |                     |
| gDNA_Solyc06g082820 | <b>TTCTCAAATG</b>  | <b>ACTCGCGATA</b>  | <b>GACTCATATG</b>  | <b>ATCACCTTCT</b>    | <b>TTCTCTGATT</b>   |
| cDNA_Solyc06g082820 | -----              | -----              | -----              | -----                | -----               |
| SIMLO9_LEAF         | -----              | -----              | -----              | -----                | -----               |
| SIMLO9_FLOWER       | -----              | -----              | -----              | -----                | -----               |
| SIMLO9_FRUIT        | -----              | -----              | -----              | -----                | -----               |
|                     | 2,260              |                    | 2,280              |                      | 2,300               |
| gDNA_Solyc06g082820 | <b>CGTATTGGTA</b>  | <b>TTAATCAACT</b>  | <b>AACTTACTGT</b>  | <b>ATTTTGGTGA</b>    | <b>AAATTTGCAG</b>   |
| cDNA_Solyc06g082820 | -----              | -----              | -----              | -----                | -----G              |
| SIMLO9_LEAF         | -----              | -----              | -----              | -----                | -----G              |
| SIMLO9_FLOWER       | -----              | -----              | -----              | -----                | -----G              |
| SIMLO9_FRUIT        | -----              | -----              | -----              | -----                | -----G              |
|                     | 2,320              |                    | 2,340              |                      |                     |
| gDNA_Solyc06g082820 | <b>CGTTCTTTCT</b>  | <b>TCAAGCAATT</b>  | <b>TTATGCTTCT</b>  | <b>GTCAACGAAT</b>    | <b>CAGACTACAG</b>   |
| cDNA_Solyc06g082820 | CGTTCTTTCT         | TCAAGCAATT         | TTATGCTTCT         | GTCAACGAAT           | CAGACTACAG          |
| SIMLO9_LEAF         | CGTTCTTTCT         | TCAAGCAATT         | TTATGCTTCT         | GTCAACGAAT           | CAGACTACAG          |
| SIMLO9_FLOWER       | CGTTCTTTCT         | TCAAGCAATT         | TTATGCTTCT         | GTCAACGAAT           | CAGACTACAG          |
| SIMLO9_FRUIT        | CGTTCTTTCT         | TCAAGCAATT         | TTATGCTTCT         | GTCAACGAAT           | CAGACTACAG          |
|                     | 2,360              |                    | 2,380              |                      | 2,400               |
| gDNA_Solyc06g082820 | <b>AGCGCTTCGT</b>  | <b>TTGGGATTCA</b>  | <b>TTATGGTAAC</b>  | <b>TATGTTCAAT</b>    | <b>TGCCATAGTT</b>   |
| cDNA_Solyc06g082820 | AGCGCTTCGT         | TTGGGATTCA         | TTATG-----         | -----                | -----               |
| SIMLO9_LEAF         | AGCGCTTCGT         | TTGGGATTCA         | TTATG-----         | -----                | -----               |
| SIMLO9_FLOWER       | AGCGCTTCGT         | TTGGGATTCA         | TTATG-----         | -----                | -----               |
| SIMLO9_FRUIT        | AGCGCTTCGT         | TTGGGATTCA         | TTATG-----         | -----                | -----               |
|                     | 2,420              |                    | 2,440              |                      |                     |
| gDNA_Solyc06g082820 | <b>GTTAGATAGA</b>  | <b>AACTGTTTTA</b>  | <b>CAATGTAGTG</b>  | <b>ATTTTACTT</b>     | <b>GGCTTATACA</b>   |
| cDNA_Solyc06g082820 | -----              | -----              | -----              | -----                | -----               |
| SIMLO9_LEAF         | -----              | -----              | -----              | -----                | -----               |
| SIMLO9_FLOWER       | -----              | -----              | -----              | -----                | -----               |
| SIMLO9_FRUIT        | -----              | -----              | -----              | -----                | -----               |
|                     | 2,460              |                    | 2,480              |                      | 2,500               |
| gDNA_Solyc06g082820 | <b>TAATATTAGT</b>  | <b>AAAAGCATAT</b>  | <b>TCCTTGTGTA</b>  | <b>GACACATTGC</b>    | <b>AAGGGAAATC</b>   |
| cDNA_Solyc06g082820 | -----              | -----              | -----              | -----ACACATTGC       | -----AAGGGAAATC     |
| SIMLO9_LEAF         | -----              | -----              | -----              | -----ACACATTGC       | -----AAGGGAAATC     |
| SIMLO9_FLOWER       | -----              | -----              | -----              | -----ACACATTGC       | -----AAGGGAAATC     |
| SIMLO9_FRUIT        | -----              | -----              | -----              | -----ACACATTGC       | -----AAGGGAAATC     |
|                     | 2,520              |                    | 2,540              |                      |                     |
| gDNA_Solyc06g082820 | <b>CAAGATTCAA</b>  | <b>TTTTCATAGG</b>  | <b>TACATGATAC</b>  | <b>GTGCAC T GGA</b>  | <b>AGACGATTTT</b>   |
| cDNA_Solyc06g082820 | CAAGATTCAA         | TTTTCATAGG         | TACATGATAC         | GTGCAC T GGA         | AGACGATTTT          |
| SIMLO9_LEAF         | CAAGATTCAA         | TTTTCATAGG         | TACATGATAC         | GTGCAC T GGA         | AGACGATTTT          |
| SIMLO9_FLOWER       | CAAGATTCAA         | TTTTCATAGG         | TACATGATAC         | GTGCAC T GGA         | AGACGATTTT          |
| SIMLO9_FRUIT        | CAAGATTCAA         | TTTTCATAGG         | TACATGATAC         | GTGCAC T GGA         | AGACGATTTT          |
|                     | 2,560              |                    | 2,580              |                      | 2,600               |
| gDNA_Solyc06g082820 | <b>AGGACAG TTG</b> | <b>TTGGTATCAG</b>  | <b>GCAAGT GATA</b> | <b>GAA T GAT GCT</b> | <b>AAAGC TCTT A</b> |
| cDNA_Solyc06g082820 | AGGACAG TTG        | TTGGTATCAG         | -----              | -----                | -----               |
| SIMLO9_LEAF         | AGGACAG TTG        | TTGGTATCAG         | -----              | -----                | -----               |
| SIMLO9_FLOWER       | AGGACAG TTG        | TTGGTATCAG         | -----              | -----                | -----               |
| SIMLO9_FRUIT        | AGGACAG TTG        | TTGGTATCAG         | -----              | -----                | -----               |
|                     | 2,620              |                    | 2,640              |                      |                     |
| gDNA_Solyc06g082820 | <b>GAATGTAGTT</b>  | <b>TCTCACTGCT</b>  | <b>GTTTCTTCAA</b>  | <b>ATGAACTTGT</b>    | <b>CGCTCTTTGT</b>   |
| cDNA_Solyc06g082820 | -----              | -----              | -----              | -----                | -----               |
| SIMLO9_LEAF         | -----              | -----              | -----              | -----                | -----               |
| SIMLO9_FLOWER       | -----              | -----              | -----              | -----                | -----               |
| SIMLO9_FRUIT        | -----              | -----              | -----              | -----                | -----               |
|                     | 2,660              |                    | 2,680              |                      | 2,700               |
| gDNA_Solyc06g082820 | <b>TTTTTGTGTTG</b> | <b>TTTTGCAGTT</b>  | <b>GGTATCTCTG</b>  | <b>GATATTTCGTA</b>   | <b>ATCCTCTTCT</b>   |
| cDNA_Solyc06g082820 | -----              | -----TT            | GGTATCTCTG         | GATATTTCGTA          | ATCCTCTTCT          |
| SIMLO9_LEAF         | -----              | -----TT            | GGTATCTCTG         | GATATTTCGTA          | ATCCTCTTCT          |
| SIMLO9_FLOWER       | -----              | -----TT            | GGTATCTCTG         | GATATTTCGTA          | ATCCTCTTCT          |
| SIMLO9_FRUIT        | -----              | -----TT            | GGTATCTCTG         | GATATTTCGTA          | ATCCTCTTCT          |
|                     | 2,720              |                    | 2,740              |                      |                     |
| gDNA_Solyc06g082820 | <b>TGTTGCCTAA</b>  | <b>CATTAACGGT</b>  | <b>ATATCCCAGC</b>  | <b>TCAAAC TTGT</b>   | <b>TCACCTTGCC</b>   |
| cDNA_Solyc06g082820 | TGTTGCCTAA         | CATTAACGGT         | -----              | -----                | -----               |
| SIMLO9_LEAF         | TGTTGCCTAA         | CATTAACGGT         | -----              | -----                | -----               |
| SIMLO9_FLOWER       | TGTTGCCTAA         | CATTAACGGT         | -----              | -----                | -----               |
| SIMLO9_FRUIT        | TGTTGCCTAA         | CATTAACGGT         | -----              | -----                | -----               |
|                     | 2,760              |                    | 2,780              |                      | 2,800               |
| gDNA_Solyc06g082820 | <b>ACACTGCTAC</b>  | <b>GATTTTCATGC</b> | <b>TACAGCCTAC</b>  | <b>TACAA TGCTA</b>   | <b>TTGTGCTTTG</b>   |
| cDNA_Solyc06g082820 | -----              | -----              | -----              | -----                | -----               |
| SIMLO9_LEAF         | -----              | -----              | -----              | -----                | -----               |
| SIMLO9_FLOWER       | -----              | -----              | -----              | -----                | -----               |
| SIMLO9_FRUIT        | -----              | -----              | -----              | -----                | -----               |

|                     |                                                                      |       |       |       |      |
|---------------------|----------------------------------------------------------------------|-------|-------|-------|------|
|                     |                                                                      | 2,820 |       | 2,840 |      |
| gDNA_Solyc06g082820 | <b>TGCTTTCGTT TAGAGGATAG TTTCTGTTTAT TGTGATGTGA AGATTGATAC</b>       |       |       |       | 2850 |
| cDNA_Solyc06g082820 | -----                                                                |       |       |       | 963  |
| SIMLO9_LEAF         | -----                                                                |       |       |       | 839  |
| SIMLO9_FLOWER       | -----                                                                |       |       |       | 963  |
| SIMLO9_FRUIT        | -----                                                                |       |       |       | 963  |
|                     |                                                                      | 2,860 | 2,880 | 2,900 |      |
| gDNA_Solyc06g082820 | <b>ATCACTGTGC TTGTGCAGGT TGGCATACAT ATTTCTGGAT TGCTTTCTTT</b>        |       |       |       | 2900 |
| cDNA_Solyc06g082820 | ----- <b>TGGCA TACA T ATTTCTGGAT TGCTTTCTTT</b>                      |       |       |       | 993  |
| SIMLO9_LEAF         | ----- <b>TGGCA TACA T ATTTCTGGAT TGCTTTCTTT</b>                      |       |       |       | 869  |
| SIMLO9_FLOWER       | ----- <b>TGGCA TACA T ATTTCTGGAT TGCTTTCTTT</b>                      |       |       |       | 993  |
| SIMLO9_FRUIT        | ----- <b>TGGCA TACA T ATTTCTGGAT TGCTTTCTTT</b>                      |       |       |       | 993  |
|                     |                                                                      | 2,920 | 2,940 |       |      |
| gDNA_Solyc06g082820 | <b>CCTTTTATTG TGAGTGACCC CGTCATGAAT TTCACTCGTA TAGTTTTCAT</b>        |       |       |       | 2950 |
| cDNA_Solyc06g082820 | -----                                                                |       |       |       | 1002 |
| SIMLO9_LEAF         | -----                                                                |       |       |       | 878  |
| SIMLO9_FLOWER       | -----                                                                |       |       |       | 1002 |
| SIMLO9_FRUIT        | -----                                                                |       |       |       | 1002 |
|                     |                                                                      | 2,960 | 2,980 | 3,000 |      |
| gDNA_Solyc06g082820 | <b>TCTTTCAGTC TCCTATCTAT GAATTAACGT TCAGCACACG ATCACGAGAG</b>        |       |       |       | 3000 |
| cDNA_Solyc06g082820 | -----                                                                |       |       |       | 1002 |
| SIMLO9_LEAF         | -----                                                                |       |       |       | 878  |
| SIMLO9_FLOWER       | -----                                                                |       |       |       | 1002 |
| SIMLO9_FRUIT        | -----                                                                |       |       |       | 1002 |
|                     |                                                                      | 3,020 | 3,040 |       |      |
| gDNA_Solyc06g082820 | <b>CTATCAATTT AGGCTCTTTT TTTTGTTAAT AAAAATAGTT CAAGGGTAAT</b>        |       |       |       | 3050 |
| cDNA_Solyc06g082820 | -----                                                                |       |       |       | 1002 |
| SIMLO9_LEAF         | -----                                                                |       |       |       | 878  |
| SIMLO9_FLOWER       | -----                                                                |       |       |       | 1002 |
| SIMLO9_FRUIT        | -----                                                                |       |       |       | 1002 |
|                     |                                                                      | 3,060 | 3,080 | 3,100 |      |
| gDNA_Solyc06g082820 | <b>CTGCACTGCT ACTCTACTCA TATTC AAGTC ATAATAAAAT GGTAGCCAAC</b>       |       |       |       | 3100 |
| cDNA_Solyc06g082820 | -----                                                                |       |       |       | 1002 |
| SIMLO9_LEAF         | -----                                                                |       |       |       | 878  |
| SIMLO9_FLOWER       | -----                                                                |       |       |       | 1002 |
| SIMLO9_FRUIT        | -----                                                                |       |       |       | 1002 |
|                     |                                                                      | 3,120 | 3,140 |       |      |
| gDNA_Solyc06g082820 | <b>ATGATCAAGG CTTAAAAGCA GCAGGAAGCT AAGTTGATT TATGTTGCT</b>          |       |       |       | 3150 |
| cDNA_Solyc06g082820 | -----                                                                |       |       |       | 1002 |
| SIMLO9_LEAF         | -----                                                                |       |       |       | 878  |
| SIMLO9_FLOWER       | -----                                                                |       |       |       | 1002 |
| SIMLO9_FRUIT        | -----                                                                |       |       |       | 1002 |
|                     |                                                                      | 3,160 | 3,180 | 3,200 |      |
| gDNA_Solyc06g082820 | <b>TTTTGGTTCT TCATTTTTTC AGCTTCTGCT CTCTGTGGGA ACAAGTTGG</b>         |       |       |       | 3200 |
| cDNA_Solyc06g082820 | ----- <b>CTTCTGCT CTCTGTGGGA ACAAGTTGG</b>                           |       |       |       | 1030 |
| SIMLO9_LEAF         | ----- <b>CTTCTGCT CTCTGTGGGA ACAAGTTGG</b>                           |       |       |       | 906  |
| SIMLO9_FLOWER       | ----- <b>CTTCTGCT CTCTGTGGGA ACAAGTTGG</b>                           |       |       |       | 1030 |
| SIMLO9_FRUIT        | ----- <b>CTTCTGCT CTCTGTGGGA ACAAGTTGG</b>                           |       |       |       | 1030 |
|                     |                                                                      | 3,220 | 3,240 |       |      |
| gDNA_Solyc06g082820 | <b>AGCATGTGAT TCTACAGTTA GCTCATGAAA TTGCTGAGAA ACATGTAGCT</b>        |       |       |       | 3250 |
| cDNA_Solyc06g082820 | ----- <b>AGCATGTGAT TCTACAGTTA GCTCATGAAA TTGCTGAGAA ACATGTAGCT</b>  |       |       |       | 1080 |
| SIMLO9_LEAF         | ----- <b>AGCATGTGAT TCTACAGTTA GCTCATGAAA TTGCTGAGAA ACATGTAGCT</b>  |       |       |       | 956  |
| SIMLO9_FLOWER       | ----- <b>AGCATGTGAT TCTACAGTTA GCTCATGAAA TTGCTGAGAA ACATGTAGCT</b>  |       |       |       | 1080 |
| SIMLO9_FRUIT        | ----- <b>AGCATGTGAT TCTACAGTTA GCTCATGAAA TTGCTGAGAA ACATGTAGCT</b>  |       |       |       | 1080 |
|                     |                                                                      | 3,260 | 3,280 | 3,300 |      |
| gDNA_Solyc06g082820 | <b>ATAGAAGGCG AATTGGTTGT AACACCATCT GATAATCACT TTTGGTTCGA</b>        |       |       |       | 3300 |
| cDNA_Solyc06g082820 | ----- <b>ATAGAAGGCG AATTGGTTGT AACACCATCT GATAATCACT TTTGGTTCGA</b>  |       |       |       | 1130 |
| SIMLO9_LEAF         | ----- <b>ATAGAAGGCG AATTGGTTGT AACACCATCT GATAATCACT TTTGGTTCGA</b>  |       |       |       | 1006 |
| SIMLO9_FLOWER       | ----- <b>ATAGAAGGCG AATTGGTTGT AACACCATCT GATAATCACT TTTGGTTCGA</b>  |       |       |       | 1130 |
| SIMLO9_FRUIT        | ----- <b>ATAGAAGGCG AATTGGTTGT AACACCATCT GATAATCACT TTTGGTTCGA</b>  |       |       |       | 1130 |
|                     |                                                                      | 3,320 | 3,340 |       |      |
| gDNA_Solyc06g082820 | <b>TAACCC TCAA ATCATCCTCC TCTTGATACA TTTTATTCTC TTCCAAAATG</b>       |       |       |       | 3350 |
| cDNA_Solyc06g082820 | ----- <b>TAACCC TCAA ATCATCCTCC TCTTGATACA TTTTATTCTC TTCCAAAATG</b> |       |       |       | 1180 |
| SIMLO9_LEAF         | ----- <b>TAACCC TCAA ATCATCCTCC TCTTGATACA TTTTATTCTC TTCCAAAATG</b> |       |       |       | 1056 |
| SIMLO9_FLOWER       | ----- <b>TAACCC TCAA ATCATCCTCC TCTTGATACA TTTTATTCTC TTCCAAAATG</b> |       |       |       | 1180 |
| SIMLO9_FRUIT        | ----- <b>TAACCC TCAA ATCATCCTCC TCTTGATACA TTTTATTCTC TTCCAAAATG</b> |       |       |       | 1180 |
|                     |                                                                      | 3,360 | 3,380 | 3,400 |      |
| gDNA_Solyc06g082820 | <b>CTTTTGAAT AGCATTTTTT TTCTGGATT TGTAAGTCA TTAATCAACA</b>           |       |       |       | 3400 |
| cDNA_Solyc06g082820 | ----- <b>CTTTT GAAA T AGCA TTTTTT TTCTGGATT TG-----</b>              |       |       |       | 1212 |
| SIMLO9_LEAF         | ----- <b>CTTTT GAAA T AGCA TTTTTT TTCTGGATT TG-----</b>              |       |       |       | 1088 |
| SIMLO9_FLOWER       | ----- <b>CTTTT GAAA T AGCA TTTTTT TTCTGGATT TG-----</b>              |       |       |       | 1212 |
| SIMLO9_FRUIT        | ----- <b>CTTTT GAAA T AGCA TTTTTT TTCTGGATT TG-----</b>              |       |       |       | 1212 |
|                     |                                                                      | 3,420 | 3,440 |       |      |
| gDNA_Solyc06g082820 | <b>CCATTCTAAT TCAGTGTTCA ATACAATTTT TTCAATGTTT CTTTCCTAAA</b>        |       |       |       | 3450 |
| cDNA_Solyc06g082820 | -----                                                                |       |       |       | 1212 |
| SIMLO9_LEAF         | -----                                                                |       |       |       | 1088 |
| SIMLO9_FLOWER       | -----                                                                |       |       |       | 1212 |
| SIMLO9_FRUIT        | -----                                                                |       |       |       | 1212 |
|                     |                                                                      | 3,460 | 3,480 | 3,500 |      |
| gDNA_Solyc06g082820 | <b>TTTCATGTTT TTTTAAAAAT AATCTTTGTA GTTCCAATAT GGCTTTCACT</b>        |       |       |       | 3500 |
| cDNA_Solyc06g082820 | ----- <b>TTTCCAATAT GGCTTTCACT</b>                                   |       |       |       | 1231 |
| SIMLO9_LEAF         | ----- <b>TTTCCAATAT GGCTTTCACT</b>                                   |       |       |       | 1107 |
| SIMLO9_FLOWER       | ----- <b>TTTCCAATAT GGCTTTCACT</b>                                   |       |       |       | 1231 |
| SIMLO9_FRUIT        | ----- <b>TTTCCAATAT GGCTTTCACT</b>                                   |       |       |       | 1231 |



|                     |                   |                   |                   |                   |                    |                   |       |
|---------------------|-------------------|-------------------|-------------------|-------------------|--------------------|-------------------|-------|
|                     |                   |                   | 3,520             |                   | 3,540              |                   |       |
| gDNA_Solyc06g082820 | <b>CCTGCATTAT</b> | <b>GGGAAAATAT</b> | <b>GTC</b>        | <b>TTTGTGA</b>    | <b>TTCCACGGCT</b>  | <b>CGTCATAGGG</b> | 3550  |
| cDNA_Solyc06g082820 | <b>CCTGCATTAT</b> | <b>GGGAAAATAT</b> | <b>GTC</b>        | <b>TTTGTGA</b>    | <b>TTCCACGGCT</b>  | <b>CGTCATAGGG</b> | 1281  |
| SIMLO9_LEAF         | <b>CCTGCATTAT</b> | <b>GGGAAAATAT</b> | <b>GTC</b>        | <b>TTTGTGA</b>    | <b>TTCCACGGCT</b>  | <b>CGTCATAGGG</b> | 1157  |
| SIMLO9_FLOWER       | <b>CCTGCATTAT</b> | <b>GGGAAAATAT</b> | <b>GTC</b>        | <b>TTTGTGA</b>    | <b>TTCCACGGCT</b>  | <b>CGTCATAGGG</b> | 1281  |
| SIMLO9_FRUIT        | <b>CCTGCATTAT</b> | <b>GGGAAAATAT</b> | <b>GTC</b>        | <b>TTTGTGA</b>    | <b>TTCCACGGCT</b>  | <b>CGTCATANGG</b> | 1281  |
|                     | 3,560             |                   | 3,580             |                   | 3,600              |                   |       |
| gDNA_Solyc06g082820 | <b>TAGAGTTTAC</b> | <b>TACTCCTTCC</b> | <b>TCTATT</b>     | <b>CATATA</b>     | <b>ACTTCATATA</b>  | <b>TATATATATA</b> | 3600  |
| cDNA_Solyc06g082820 | -----             | -----             | -----             | -----             | -----              | -----             | 1281  |
| SIMLO9_LEAF         | -----             | -----             | -----             | -----             | -----              | -----             | 1157  |
| SIMLO9_FLOWER       | -----             | -----             | -----             | -----             | -----              | -----             | 1281  |
| SIMLO9_FRUIT        | -----             | -----             | -----             | -----             | -----              | -----             | 1281  |
|                     |                   | 3,620             |                   | 3,640             |                    |                   |       |
| gDNA_Solyc06g082820 | <b>TACGGTGTGA</b> | <b>TTTTTCAGCG</b> | <b>AAAGGAATTC</b> | <b>AAATAAACCA</b> | <b>ACCCCTTAT</b>   |                   | 3650  |
| cDNA_Solyc06g082820 | -----             | -----             | -----             | -----             | -----              |                   | 1281  |
| SIMLO9_LEAF         | -----             | -----             | -----             | -----             | -----              |                   | 1157  |
| SIMLO9_FLOWER       | -----             | -----             | -----             | -----             | -----              |                   | 1281  |
| SIMLO9_FRUIT        | -----             | -----             | -----             | -----             | -----              |                   | 1281  |
|                     | 3,660             |                   | 3,680             |                   | 3,700              |                   |       |
| gDNA_Solyc06g082820 | <b>TGCAAATTC</b>  | <b>TTGACCCTTA</b> | <b>ACATT</b>      | <b>CATAT</b>      | <b>ATGAAGGTGG</b>  | <b>TTTTCATCTT</b> | 3700  |
| cDNA_Solyc06g082820 | -----             | -----             | -----             | -----             | -----              | -----             | 1281  |
| SIMLO9_LEAF         | -----             | -----             | -----             | -----             | -----              | -----             | 1157  |
| SIMLO9_FLOWER       | -----             | -----             | -----             | -----             | -----              | -----             | 1281  |
| SIMLO9_FRUIT        | -----             | -----             | -----             | -----             | -----              | -----             | 1281  |
|                     |                   | 3,720             |                   | 3,740             |                    |                   |       |
| gDNA_Solyc06g082820 | <b>TTTCAGGGT</b>  | <b>AATCATTCAA</b> | <b>GTTTTATGCA</b> | <b>GCTATAGTAC</b> | <b>ACTGCCACTT</b>  |                   | 3750  |
| cDNA_Solyc06g082820 | -----             | <b>GTAATCA</b>    | <b>TTCAA</b>      | <b>GTTTTATGCA</b> | <b>GCTATAGTAC</b>  | <b>ACTGCCACTT</b> | 1323  |
| SIMLO9_LEAF         | -----             | <b>GTAATCA</b>    | <b>TTCAA</b>      | <b>GTTTTATGCA</b> | <b>GCTATAGTAC</b>  | <b>ACTGCCACTT</b> | 1199  |
| SIMLO9_FLOWER       | -----             | <b>GTAATCA</b>    | <b>TTCAA</b>      | <b>GTTTTATGCA</b> | <b>GCTATAGTAC</b>  | <b>ACTGCCACTT</b> | 1323  |
| SIMLO9_FRUIT        | -----             | <b>GTAATCA</b>    | <b>TTCAA</b>      | <b>GTTTTATGCA</b> | <b>GCTATAGTAC</b>  | <b>ACTGCCACTT</b> | 1323  |
|                     |                   |                   | 3,760             |                   | 3,780              |                   | 3,800 |
| gDNA_Solyc06g082820 | <b>TATGCTCTAG</b> | <b>TTACACAGGT</b> | <b>GAGTTTTTAC</b> | <b>TCAAACCAAT</b> | <b>CGATGAAACT</b>  |                   | 3800  |
| cDNA_Solyc06g082820 | <b>TATGCTCTAG</b> | <b>TTACACAG</b>   | -----             | -----             | -----              |                   | 1341  |
| SIMLO9_LEAF         | <b>TATGCTCTAG</b> | <b>TTACACAG</b>   | -----             | -----             | -----              |                   | 1217  |
| SIMLO9_FLOWER       | <b>TATGCTCTAG</b> | <b>TTACACAG</b>   | -----             | -----             | -----              |                   | 1341  |
| SIMLO9_FRUIT        | <b>TATGCTCTAG</b> | <b>TTACACAG</b>   | -----             | -----             | -----              |                   | 1341  |
|                     |                   | 3,820             |                   | 3,840             |                    |                   |       |
| gDNA_Solyc06g082820 | <b>TAAACCTGAA</b> | <b>TGTCCTTCTC</b> | <b>CTAATATTGT</b> | <b>TTTTACATGA</b> | <b>AATTATAGAT</b>  |                   | 3850  |
| cDNA_Solyc06g082820 | -----             | -----             | -----             | -----             | -----              | <b>AT</b>         | 1343  |
| SIMLO9_LEAF         | -----             | -----             | -----             | -----             | -----              | <b>AT</b>         | 1219  |
| SIMLO9_FLOWER       | -----             | -----             | -----             | -----             | -----              | <b>AT</b>         | 1343  |
| SIMLO9_FRUIT        | -----             | -----             | -----             | -----             | -----              | <b>AT</b>         | 1343  |
|                     | 3,860             |                   | 3,880             |                   | 3,900              |                   |       |
| gDNA_Solyc06g082820 | <b>GGGGAGTCA</b>  | <b>TATAAGAAAT</b> | <b>CGATGTTT</b>   | <b>CGA</b>        | <b>TAAATCATGTT</b> | <b>CAAACATGTC</b> | 3900  |
| cDNA_Solyc06g082820 | <b>GGGGAGTCA</b>  | <b>TATAAGAAAT</b> | <b>CGATGTTT</b>   | <b>CGA</b>        | <b>TAAATCATGTT</b> | <b>CAAACATGTC</b> | 1393  |
| SIMLO9_LEAF         | <b>GGGGAGTCA</b>  | <b>TATAAGAAAT</b> | <b>CGATGTTT</b>   | <b>CGA</b>        | <b>TAAATCATGTT</b> | <b>CAAACATGTC</b> | 1269  |
| SIMLO9_FLOWER       | <b>GGGGAGTCA</b>  | <b>TATAAGAAAT</b> | <b>CGATGTTT</b>   | <b>CGA</b>        | <b>TAAATCATGTT</b> | <b>CAAACATGTC</b> | 1393  |
| SIMLO9_FRUIT        | <b>GGGGAGTCA</b>  | <b>TATAAGAAAT</b> | <b>CGATGTTT</b>   | <b>CGA</b>        | <b>TAAATCATGTT</b> | <b>CAAACATGTC</b> | 1393  |
|                     |                   | 3,920             |                   | 3,940             |                    |                   |       |
| gDNA_Solyc06g082820 | <b>TTGTGGAATG</b> | <b>GGCTGAGAAG</b> | <b>GTGAAAAAGA</b> | <b>AGAAGGGACA</b> | <b>TAAGTATGGT</b>  |                   | 3950  |
| cDNA_Solyc06g082820 | <b>TTGTGGAATG</b> | <b>GGCTGAGAAG</b> | <b>GTGAAAAAGA</b> | <b>AGAAGGGACA</b> | <b>TAAGTATGGT</b>  |                   | 1443  |
| SIMLO9_LEAF         | <b>TTGTGGAATG</b> | <b>GGCTGAGAAG</b> | <b>GTGAAAAAGA</b> | <b>AGAAGGGACA</b> | <b>TAAGTATGGT</b>  |                   | 1319  |
| SIMLO9_FLOWER       | <b>TTGTGGAATG</b> | <b>GGCTGAGAAG</b> | <b>GTGAAAAAGA</b> | <b>AGAAGGGACA</b> | <b>TAAGTATGGT</b>  |                   | 1443  |
| SIMLO9_FRUIT        | <b>TTGTGGAATG</b> | <b>GGCTGAGAAG</b> | <b>GTGAAAAAGA</b> | <b>AGAAGGGACA</b> | <b>TAAGTATGGT</b>  |                   | 1443  |
|                     | 3,960             |                   | 3,980             |                   | 4,000              |                   |       |
| gDNA_Solyc06g082820 | <b>AGAGACGGAT</b> | <b>CTACCCGTTT</b> | <b>AAATGACGGT</b> | <b>TCTGTTGTTG</b> | <b>CAGCATCACT</b>  |                   | 4000  |
| cDNA_Solyc06g082820 | <b>AGAGACGGAT</b> | <b>CTACCCGTTT</b> | <b>AAATGACGGT</b> | <b>TCTGTTGTTG</b> | <b>CAGCATCACT</b>  |                   | 1493  |
| SIMLO9_LEAF         | <b>AGAGACGGAT</b> | <b>CTACCCGTTT</b> | <b>AAATGACGGT</b> | <b>TCTGTTGTTG</b> | <b>CAGCATCACT</b>  |                   | 1369  |
| SIMLO9_FLOWER       | <b>AGAGACGGAT</b> | <b>CTACCCGTTT</b> | <b>AAATGACGGT</b> | <b>TCTGTTGTTG</b> | <b>CAGCATCACT</b>  |                   | 1493  |
| SIMLO9_FRUIT        | <b>AGAGACGGAT</b> | <b>CTACCCGTTT</b> | <b>AAATGACGGT</b> | <b>TCTGTTGTTG</b> | <b>CAGCATCACT</b>  |                   | 1493  |
|                     |                   | 4,020             |                   | 4,040             |                    |                   |       |
| gDNA_Solyc06g082820 | <b>GTCTGTAAT</b>  | <b>GACCACAAG</b>  | <b>ATCTCCCTCA</b> | <b>AAATGGGGTT</b> | <b>TAGCTAACAT</b>  |                   | 4050  |
| cDNA_Solyc06g082820 | <b>GTCTGTAAT</b>  | <b>GACCACAAG</b>  | <b>ATCTCCCTCA</b> | <b>AAATGGGGTT</b> | <b>TAG</b>         | -----             | 1536  |
| SIMLO9_LEAF         | <b>GTCTGTAAT</b>  | <b>GACCACAAG</b>  | <b>ATCTCCCTCA</b> | <b>AAATGGGGTT</b> | <b>TAGCTAACAT</b>  |                   | 1419  |
| SIMLO9_FLOWER       | <b>GTCTGTAAT</b>  | <b>GACCACAAG</b>  | <b>ATCTCCCTCA</b> | <b>AAATGGGGTT</b> | <b>TAG</b>         | -----             | 1536  |
| SIMLO9_FRUIT        | <b>GTCTGTAAT</b>  | <b>GACCACAAG</b>  | <b>ATCTCCCTCA</b> | <b>AAATGGGGTT</b> | <b>TAG</b>         | -----             | 1536  |
|                     | 4,060             |                   | 4,080             |                   | 4,100              |                   |       |
| gDNA_Solyc06g082820 | <b>TTTGTTCAT</b>  | <b>GCCATTTGAA</b> | <b>CAATATTTTG</b> | <b>TAAAAGTTAG</b> | <b>GTATGATCCA</b>  |                   | 4100  |
| cDNA_Solyc06g082820 | -----             | -----             | -----             | -----             | -----              |                   | 1536  |
| SIMLO9_LEAF         | <b>TTTGTTCAT</b>  | <b>GCCATTTGAA</b> | <b>CAATATTTTG</b> | <b>TAAAAGTTAG</b> | <b>GTATGATCCA</b>  |                   | 1469  |
| SIMLO9_FLOWER       | -----             | -----             | -----             | -----             | -----              |                   | 1536  |
| SIMLO9_FRUIT        | -----             | -----             | -----             | -----             | -----              |                   | 1536  |
|                     |                   | 4,120             |                   | 4,140             |                    |                   |       |
| gDNA_Solyc06g082820 | <b>GTATACCAGT</b> | <b>TACTGAATAT</b> | <b>ATATATGTAT</b> | <b>GATAAGAGCG</b> | <b>CCAAAAAGCT</b>  |                   | 4150  |
| cDNA_Solyc06g082820 | -----             | -----             | -----             | -----             | -----              |                   | 1536  |
| SIMLO9_LEAF         | <b>GTATAC</b>     | -----             | -----             | -----             | -----              |                   | 1475  |
| SIMLO9_FLOWER       | -----             | -----             | -----             | -----             | -----              |                   | 1536  |
| SIMLO9_FRUIT        | -----             | -----             | -----             | -----             | -----              |                   | 1536  |
|                     | 4,160             |                   | 4,180             |                   | 4,200              |                   |       |
| gDNA_Solyc06g082820 | <b>TTAGATTTTT</b> | <b>ACTGTGCAAG</b> | <b>ATGAACTGAA</b> | <b>ATGGAGAATG</b> | <b>ATGGTTGGTG</b>  |                   | 4200  |
| cDNA_Solyc06g082820 | -----             | -----             | -----             | -----             | -----              |                   | 1536  |
| SIMLO9_LEAF         | -----             | -----             | -----             | -----             | -----              |                   | 1475  |
| SIMLO9_FLOWER       | -----             | -----             | -----             | -----             | -----              |                   | 1536  |
| SIMLO9_FRUIT        | -----             | -----             | -----             | -----             | -----              |                   | 1536  |

|                     |                              |                   |                   |                   |                        |
|---------------------|------------------------------|-------------------|-------------------|-------------------|------------------------|
|                     |                              | 4,220             |                   | 4,240             |                        |
|                     |                              |                   |                   |                   |                        |
| gDNA_Solyc06g082820 | <b>GAATTCAAAA</b>            | <b>CGTTGATCTT</b> | <b>GTTTGGGACC</b> | <b>GAGGCATGAT</b> | <b>TATCTTAGGC</b> 4250 |
| cDNA_Solyc06g082820 | -----                        | -----             | -----             | -----             | 1536                   |
| SIMLO9_LEAF         | -----                        | -----             | -----             | -----             | 1475                   |
| SIMLO9_FLOWER       | -----                        | -----             | -----             | -----             | 1536                   |
| SIMLO9_FRUIT        | -----                        | -----             | -----             | -----             | 1536                   |
|                     | 4,260                        |                   | 4,280             |                   | 4,300                  |
|                     |                              |                   |                   |                   |                        |
| gDNA_Solyc06g082820 | <b>TATTGCTGAG</b>            | <b>GTGAAAGGGG</b> | <b>GTTTTGTATA</b> | <b>TGCGTTCCT</b>  | <b>TGACGGTTTG</b> 4300 |
| cDNA_Solyc06g082820 | -----                        | -----             | -----             | -----             | 1536                   |
| SIMLO9_LEAF         | -----                        | -----             | -----             | -----             | 1475                   |
| SIMLO9_FLOWER       | -----                        | -----             | -----             | -----             | 1536                   |
| SIMLO9_FRUIT        | -----                        | -----             | -----             | -----             | 1536                   |
|                     |                              | 4,320             |                   | 4,340             |                        |
|                     |                              |                   |                   |                   |                        |
| gDNA_Solyc06g082820 | <b>ATGTAAAATT</b>            | <b>AACTGGATAT</b> | <b>ATTAAGTTTT</b> | <b>ACTTGATATA</b> | <b>AGTAAAATGT</b> 4350 |
| cDNA_Solyc06g082820 | -----                        | -----             | -----             | -----             | 1536                   |
| SIMLO9_LEAF         | -----                        | -----             | -----             | -----             | 1475                   |
| SIMLO9_FLOWER       | -----                        | -----             | -----             | -----             | 1536                   |
| SIMLO9_FRUIT        | -----                        | -----             | -----             | -----             | 1536                   |
|                     | 4,360                        |                   |                   |                   |                        |
|                     |                              |                   |                   |                   |                        |
| gDNA_Solyc06g082820 | <b>ACACCA TTTG CCA</b> »4363 |                   |                   |                   |                        |
| cDNA_Solyc06g082820 | -----»1536                   |                   |                   |                   |                        |
| SIMLO9_LEAF         | -----»1475                   |                   |                   |                   |                        |
| SIMLO9_FLOWER       | -----»1536                   |                   |                   |                   |                        |
| SIMLO9_FRUIT        | -----»1536                   |                   |                   |                   |                        |

```

                20                40
gDNA_Solyc02g083720 <<CAAACCAA T CCAGCTGATG AAATACTAATG ATAAGTCATT GCTGCAGTTT 50
cDNA_Solyc02g083720 <<CAAACCAA T CCAGCTGATG AAATACTAATG ATAAGTCATT GCTGCAGTTT 50
SIMLO10_LEAF -----
SIMLO10_ROOTS -----
SIMLO10_FLOWER -----
SIMLO10_FRUIT -----

                60                80                100
gDNA_Solyc02g083720 TTGCAC TTGA AAAAAATTCC ATCTTTCTGC AACACAAATT GTTCTGTTTC 100
cDNA_Solyc02g083720 TTGCAC TTGA AAAAAATTCC ATCTTTCTGC AACACAAATT GTTCTGTTTC 100
SIMLO10_LEAF -----
SIMLO10_ROOTS -----
SIMLO10_FLOWER -----
SIMLO10_FRUIT -----

                120                140
gDNA_Solyc02g083720 AAGAAG ATGA TGTAAATAAG GTTTATGTAG TTTTCTAAAG GTTGTTCAT 150
cDNA_Solyc02g083720 AAGAAG ATGA TGTAAATAAG GTTTATGTAG TTTTCTAAAG GTTGTTCAT 150
SIMLO10_LEAF -----
SIMLO10_ROOTS -----
SIMLO10_FLOWER -----
SIMLO10_FRUIT -----

                160                180                200
gDNA_Solyc02g083720 ACTTTACTTA TTTGTCAAGA TGGGTAATTT GGAAGGGGCG TCGTTTGCTG 200
cDNA_Solyc02g083720 ACTTTACTTA TTTGTCAAGA TGGGTAATTT GGAAGGGGCG TCGTTTGCTG 200
SIMLO10_LEAF ----- A TGGG TAA TTT GGAAGGGGCG TCG TTTGCTG 31
SIMLO10_ROOTS ----- A TGGG TAA TTT GGAAGGGGCG TCG TTTGCTG 31
SIMLO10_FLOWER ----- A TGGG TAA TTT GGAAGGGGCG TCG TTTGCTG 31
SIMLO10_FRUIT ----- A TGGG TAA TTT GGAAGGGGCG TCG TTTGCTG 31

                220                240
gDNA_Solyc02g083720 AAACACCAAC ATGGGCCG TG GCAACAG TCG TAGCTGTTCT GGTGAGCATT 250
cDNA_Solyc02g083720 AAACACCAAC ATGGGCCG TG GCAACAG TCG TAGCTGTTCT GGTGAGCATT 250
SIMLO10_LEAF AAACACCAAC ATGGGCCG TG GCAACAG TCG TAGCTGTTCT GGTGAGCATT 81
SIMLO10_ROOTS AAACACCAAC ATGGGCCG TG GCAACAG TCG TAGCTGTTCT GGTGAGCATT 81
SIMLO10_FLOWER AAACACCAAC ATGGGCCG TG GCAACAG TCG TAGCTGTTCT GGTGAGCATT 81
SIMLO10_FRUIT AAACACCAAC ATGGGCCG TG GCAACAG TCG TAGCTGTTCT GGTGAGCATT 81

                260                280                300
gDNA_Solyc02g083720 GGTTTCTTGA TCCATGGAAG TTTGAAGAAG TTTGAAAGG TAAGGAAAAA 300
cDNA_Solyc02g083720 GGTTTCTTGA TCCATGGAAG TTTGAAGAAG TTTGAAAGG ----- 289
SIMLO10_LEAF GGTTTCTTGA TCCATGGAAG TTTGAAGAAG TTTGAAAGG ----- 120
SIMLO10_ROOTS GGTTTCTTGA TCCATGGAAG TTTGAAGAAG TTTGAAAGG ----- 120
SIMLO10_FLOWER GGTTTCTTGA TCCATGGAAG TTTGAAGAAG TTTGAAAGG ----- 120
SIMLO10_FRUIT GGTTTCTTGA TCCATGGAAG TTTGAAGAAG TTTGAAAGG ----- 120

                320                340
gDNA_Solyc02g083720 AAGACTATCT TTCTTGGAAG TGA AAAAATTT TCTGTTGACT TATGTGTTTT 350
cDNA_Solyc02g083720 -----
SIMLO10_LEAF -----
SIMLO10_ROOTS -----
SIMLO10_FLOWER -----
SIMLO10_FRUIT -----

                360                380                400
gDNA_Solyc02g083720 GTTGTATAG TGTTGCATA GGACAAAGAG GGAACCTCTG TATGCTGCAC 400
cDNA_Solyc02g083720 ----- TGGTTGCA TA GGACAAAGAG GGAACC TCTG TA TGC TGCAC 329
SIMLO10_LEAF ----- TGGTTGCA TA GGACAAAGAG GGAACC TCTG TA TGC TGCAC 160
SIMLO10_ROOTS ----- TGGTTGCA TA GGACAAAGAG GGAACC TCTG TA TGC TGCAC 160
SIMLO10_FLOWER ----- TGGTTGCA TA GGACAAAGAG GGAACC TCTG TA TGC TGCAC 160
SIMLO10_FRUIT ----- TGGTTGCA TA GGACAAAGAG GGAACC TCTG TA TGC TGCAC 160

                420                440
gDNA_Solyc02g083720 TAGAGAAAA CAAGGAAGGT AAGCCACCTA TTAATCATCT GTATATTGAG 450
cDNA_Solyc02g083720 TAGAGAAAA CAAGGAAG -----
SIMLO10_LEAF TAGAGAAAA CAAGGAAG ----- 178
SIMLO10_ROOTS TAGAGAAAA CAAGGAAG ----- 178
SIMLO10_FLOWER TAGAGAAAA CAAGGAAG ----- 178
SIMLO10_FRUIT TAGAGAAAA CAAGGAAG ----- 178

                460                480                500
gDNA_Solyc02g083720 TCTTTCTTGA TCACTGCATA TATAGAAGGT TTCTGCAGAT AATTTTTTAC 500
cDNA_Solyc02g083720 -----
SIMLO10_LEAF -----
SIMLO10_ROOTS -----
SIMLO10_FLOWER -----
SIMLO10_FRUIT -----

                520                540
gDNA_Solyc02g083720 TTGAACGTCG AATATACTAT ATGGAATAA GTAGGAATAG AGTTATCGGT 550
cDNA_Solyc02g083720 -----
SIMLO10_LEAF -----
SIMLO10_ROOTS -----
SIMLO10_FLOWER -----
SIMLO10_FRUIT -----

                560                580                600
gDNA_Solyc02g083720 TATAGAAAA TGTACATATT AAGTGTGTTT TAAACACAA ATATAGAGTT 600
cDNA_Solyc02g083720 -----
SIMLO10_LEAF -----
SIMLO10_ROOTS -----
SIMLO10_FLOWER -----
SIMLO10_FRUIT -----

```

|                     |                    |                   |                   |                   |                    |      |
|---------------------|--------------------|-------------------|-------------------|-------------------|--------------------|------|
|                     |                    |                   | 620               |                   | 640                |      |
| gDNA_Solyc02g083720 | <b>TGAGCTAAAG</b>  | <b>CTGTTGATGT</b> | <b>CAGAACTTAC</b> | <b>ACCTCCAGTC</b> | <b>TAATAAAACC</b>  | 650  |
| cDNA_Solyc02g083720 | .....              | .....             | .....             | .....             | .....              | 347  |
| SIMLO10_LEAF        | .....              | .....             | .....             | .....             | .....              | 178  |
| SIMLO10_ROOTS       | .....              | .....             | .....             | .....             | .....              | 178  |
| SIMLO10_FLOWER      | .....              | .....             | .....             | .....             | .....              | 178  |
| SIMLO10_FRUIT       | .....              | .....             | .....             | .....             | .....              | 178  |
|                     | 660                |                   | 680               |                   | 700                |      |
| gDNA_Solyc02g083720 | <b>TAAACAGGTG</b>  | <b>GTGTTGGTTC</b> | <b>TTCTAAACGC</b> | <b>TACTGCTTTT</b> | <b>TTGCGCTAAA</b>  | 700  |
| cDNA_Solyc02g083720 | .....              | .....             | .....             | .....             | .....              | 347  |
| SIMLO10_LEAF        | .....              | .....             | .....             | .....             | .....              | 178  |
| SIMLO10_ROOTS       | .....              | .....             | .....             | .....             | .....              | 178  |
| SIMLO10_FLOWER      | .....              | .....             | .....             | .....             | .....              | 178  |
| SIMLO10_FRUIT       | .....              | .....             | .....             | .....             | .....              | 178  |
|                     |                    | 720               |                   | 740               |                    |      |
| gDNA_Solyc02g083720 | <b>GTGGAGGGAT</b>  | <b>CCTATCCATT</b> | <b>CCACTACAAT</b> | <b>TTATGATTGC</b> | <b>TTGATGAACT</b>  | 750  |
| cDNA_Solyc02g083720 | .....              | .....             | .....             | .....             | .....              | 347  |
| SIMLO10_LEAF        | .....              | .....             | .....             | .....             | .....              | 178  |
| SIMLO10_ROOTS       | .....              | .....             | .....             | .....             | .....              | 178  |
| SIMLO10_FLOWER      | .....              | .....             | .....             | .....             | .....              | 178  |
| SIMLO10_FRUIT       | .....              | .....             | .....             | .....             | .....              | 178  |
|                     | 760                |                   | 780               |                   | 800                |      |
| gDNA_Solyc02g083720 | <b>CATTTGTTTT</b>  | <b>GCTTCTCTT</b>  | <b>CCCTTTTTTT</b> | <b>GTGCGGCAAG</b> | <b>CAGAGCTTAT</b>  | 800  |
| cDNA_Solyc02g083720 | .....              | .....             | .....             | .....             | ---AGCTTAT         | 354  |
| SIMLO10_LEAF        | .....              | .....             | .....             | .....             | ---AGCTTAT         | 185  |
| SIMLO10_ROOTS       | .....              | .....             | .....             | .....             | ---AGCTTAT         | 185  |
| SIMLO10_FLOWER      | .....              | .....             | .....             | .....             | ---AGCTTAT         | 185  |
| SIMLO10_FRUIT       | .....              | .....             | .....             | .....             | ---AGCTTAT         | 185  |
|                     |                    | 820               |                   | 840               |                    |      |
| gDNA_Solyc02g083720 | <b>GGTTTTTGGG</b>  | <b>CTGCTCTCAC</b> | <b>TGCTTATGGG</b> | <b>TCATTGGATC</b> | <b>GTTTATATTG</b>  | 850  |
| cDNA_Solyc02g083720 | <b>GGTTTTTGGG</b>  | <b>CTGCTCTCAC</b> | <b>TGCTTATGGG</b> | <b>TCATTGGATC</b> | <b>GTTTATATTG</b>  | 404  |
| SIMLO10_LEAF        | <b>GGTTTTTGGG</b>  | <b>CTGCTCTCAC</b> | <b>TGCTTATGGG</b> | <b>TCATTGGATC</b> | <b>GTTTATATTG</b>  | 235  |
| SIMLO10_ROOTS       | <b>GGTTTTTGGG</b>  | <b>CTGCTCTCAC</b> | <b>TGCTTATGGG</b> | <b>TCATTGGATC</b> | <b>GTTTATATTG</b>  | 235  |
| SIMLO10_FLOWER      | <b>GGTTTTTGGG</b>  | <b>CTGCTCTCAC</b> | <b>TGCTTATGGG</b> | <b>TCATTGGATC</b> | <b>GTTTATATTG</b>  | 235  |
| SIMLO10_FRUIT       | <b>GGTTTCTGGA</b>  | <b>CTGCTCTCAC</b> | <b>TGCTTATGGG</b> | <b>TCATTGGATC</b> | <b>GTTTATATTG</b>  | 235  |
|                     | 860                |                   | 880               |                   | 900                |      |
| gDNA_Solyc02g083720 | <b>CAAAGA TTTG</b> | <b>TGTCAAATCG</b> | <b>TCAGCAGTGA</b> | <b>GCAGCCACTT</b> | <b>TTATCCCTGT</b>  | 900  |
| cDNA_Solyc02g083720 | <b>CAAAGA TTTG</b> | <b>TGTCAAATCG</b> | <b>TCAGCAGTGA</b> | <b>GCAGCCACTT</b> | <b>TTATCCCTGT</b>  | 454  |
| SIMLO10_LEAF        | <b>CAAAGA TTTG</b> | <b>TGTCAAATCG</b> | <b>TCAGCAGTGA</b> | <b>GCAGCCACTT</b> | <b>TTATCCCTGT</b>  | 285  |
| SIMLO10_ROOTS       | <b>CAAAGA TTTG</b> | <b>TGTCAAATCG</b> | <b>TCAGCAGTGA</b> | <b>GCAGCCACTT</b> | <b>TTATCCCTGT</b>  | 285  |
| SIMLO10_FLOWER      | <b>CAAAGA TTTG</b> | <b>TGTCAAATCG</b> | <b>TCAGCAGTGA</b> | <b>GCAGCCACTT</b> | <b>TTATCCCTGT</b>  | 285  |
| SIMLO10_FRUIT       | <b>CAAAGA TTTG</b> | <b>TGTCAAATCG</b> | <b>TCAGCAGTGA</b> | <b>GCAGCCACTT</b> | <b>TTATCCCTGT</b>  | 285  |
|                     |                    | 920               |                   | 940               |                    |      |
| gDNA_Solyc02g083720 | <b>TCTCCGCCAA</b>  | <b>GAAACAAGAT</b> | <b>GAAGTCAGCA</b> | <b>ATTACAAGAT</b> | <b>TTGCTTTATC</b>  | 950  |
| cDNA_Solyc02g083720 | <b>TCTCCGCCAA</b>  | <b>GAAACAAGAT</b> | <b>GAAGTCAGCA</b> | <b>ATTACAAGAT</b> | <b>TTGCTTTATC</b>  | 504  |
| SIMLO10_LEAF        | <b>TCTCCGCCAA</b>  | <b>GAAACAAGAT</b> | <b>GAAGTCAGCA</b> | <b>ATTACAAGAT</b> | <b>TTGCTTTATC</b>  | 335  |
| SIMLO10_ROOTS       | <b>TCTCCGCCAA</b>  | <b>GAAACAAGAT</b> | <b>GAAGTCAGCA</b> | <b>ATTACAAGAT</b> | <b>TTGCTTTATC</b>  | 335  |
| SIMLO10_FLOWER      | <b>TCTCCGCCAA</b>  | <b>GAAACAAGAT</b> | <b>GAAGTCAGCA</b> | <b>ATTACAAGAT</b> | <b>TTGCTTTATC</b>  | 335  |
| SIMLO10_FRUIT       | <b>TCTCCGCCAA</b>  | <b>GAAACAAGAT</b> | <b>GAAGTCAGCA</b> | <b>ATTACAAGAT</b> | <b>TTGCTTTATC</b>  | 335  |
|                     | 960                |                   | 980               |                   | 1,000              |      |
| gDNA_Solyc02g083720 | <b>AGGTTCTTCA</b>  | <b>TACTCGAATT</b> | <b>TCTCAACATC</b> | <b>AAGGCTACTG</b> | <b>TTAAGCAGTG</b>  | 1000 |
| cDNA_Solyc02g083720 | <b>AGGTTCTTCA</b>  | <b>TACTCGAATT</b> | <b>TCTCAACATC</b> | <b>AAGGCTACTG</b> | <b>TTAAGCAGTG</b>  | 554  |
| SIMLO10_LEAF        | <b>AGGTTCTTCA</b>  | <b>TACTCGAATT</b> | <b>TCTCAACATC</b> | <b>AAGGCTACTG</b> | <b>TTAAGCAGTG</b>  | 385  |
| SIMLO10_ROOTS       | <b>AGGTTCTTCA</b>  | <b>TACTCGAATT</b> | <b>TCTCAACATC</b> | <b>AAGGCTACTG</b> | <b>TTAAGCAGTG</b>  | 385  |
| SIMLO10_FLOWER      | <b>AGGTTCTTCA</b>  | <b>TACTCGAATT</b> | <b>TCTCAACATC</b> | <b>AAGGCTACTG</b> | <b>TTAAGCAGTG</b>  | 385  |
| SIMLO10_FRUIT       | <b>AGGTTCTTCA</b>  | <b>TACTCGAATT</b> | <b>TCTCAACATC</b> | <b>AAGGCTACTG</b> | <b>TTAAGCAGTG</b>  | 385  |
|                     |                    | 1,020             |                   | 1,040             |                    |      |
| gDNA_Solyc02g083720 | <b>GACATGAAGA</b>  | <b>TTTTTGTCTT</b> | <b>GAGGTAGCCC</b> | <b>AGTAA TGAA</b> | <b>GTTCCAC TCA</b> | 1050 |
| cDNA_Solyc02g083720 | <b>GACATGAAGA</b>  | <b>TTTTTGTCTT</b> | <b>GAGG</b>       | .....             | .....              | 578  |
| SIMLO10_LEAF        | <b>GACATGAAGA</b>  | <b>TTTTTGTCTT</b> | <b>GAGG</b>       | .....             | .....              | 409  |
| SIMLO10_ROOTS       | <b>GACATGAAGA</b>  | <b>TTTTTGTCTT</b> | <b>GAGG</b>       | .....             | .....              | 409  |
| SIMLO10_FLOWER      | <b>GACATGAAGA</b>  | <b>TTTTTGTCTT</b> | <b>GAGG</b>       | .....             | .....              | 409  |
| SIMLO10_FRUIT       | <b>GACATGAAGA</b>  | <b>TTTTTGTCTT</b> | <b>GAGG</b>       | .....             | .....              | 409  |
|                     | 1,060              |                   | 1,080             |                   | 1,100              |      |
| gDNA_Solyc02g083720 | <b>AAATTTAATC</b>  | <b>TGACATTTAC</b> | <b>TTTTAACAGT</b> | <b>TTTTGGTTGA</b> | <b>TCTGTCACAA</b>  | 1100 |
| cDNA_Solyc02g083720 | .....              | .....             | .....             | .....             | .....              | 578  |
| SIMLO10_LEAF        | .....              | .....             | .....             | .....             | .....              | 409  |
| SIMLO10_ROOTS       | .....              | .....             | .....             | .....             | .....              | 409  |
| SIMLO10_FLOWER      | .....              | .....             | .....             | .....             | .....              | 409  |
| SIMLO10_FRUIT       | .....              | .....             | .....             | .....             | .....              | 409  |
|                     |                    | 1,120             |                   | 1,140             |                    |      |
| gDNA_Solyc02g083720 | <b>GCTATCATCA</b>  | <b>ACTGAAAAA</b>  | <b>ACTAATGCTA</b> | <b>CCGTGGAATC</b> | <b>TCTAGTCTAT</b>  | 1150 |
| cDNA_Solyc02g083720 | .....              | .....             | .....             | .....             | .....              | 578  |
| SIMLO10_LEAF        | .....              | .....             | .....             | .....             | .....              | 409  |
| SIMLO10_ROOTS       | .....              | .....             | .....             | .....             | .....              | 409  |
| SIMLO10_FLOWER      | .....              | .....             | .....             | .....             | .....              | 409  |
| SIMLO10_FRUIT       | .....              | .....             | .....             | .....             | .....              | 409  |
|                     | 1,160              |                   | 1,180             |                   | 1,200              |      |
| gDNA_Solyc02g083720 | <b>TGTTGTAAGC</b>  | <b>TAAAAATTTG</b> | <b>CACATGAGAT</b> | <b>TGTTCTATGT</b> | <b>AAATCCTAAA</b>  | 1200 |
| cDNA_Solyc02g083720 | .....              | .....             | .....             | .....             | .....              | 578  |
| SIMLO10_LEAF        | .....              | .....             | .....             | .....             | .....              | 409  |
| SIMLO10_ROOTS       | .....              | .....             | .....             | .....             | .....              | 409  |
| SIMLO10_FLOWER      | .....              | .....             | .....             | .....             | .....              | 409  |
| SIMLO10_FRUIT       | .....              | .....             | .....             | .....             | .....              | 409  |

|                     |                                   |                                   |                           |                                   |                                   |      |
|---------------------|-----------------------------------|-----------------------------------|---------------------------|-----------------------------------|-----------------------------------|------|
|                     |                                   | 1,220                             |                           | 1,240                             |                                   |      |
| gDNA_Solyc02g083720 | <b>TGTAGCATAA</b>                 | <b>TTTATAGTCA</b>                 | <b>AATGTTTTCG</b>         | <b>TCCAGTGAAG</b>                 | <b>TTCCATGATA</b>                 | 1250 |
| cDNA_Solyc02g083720 | -----                             | -----                             | -----                     | -----                             | -----                             | 578  |
| SIMLO10_LEAF        | -----                             | -----                             | -----                     | -----                             | -----                             | 409  |
| SIMLO10_ROOTS       | -----                             | -----                             | -----                     | -----                             | -----                             | 409  |
| SIMLO10_FLOWER      | -----                             | -----                             | -----                     | -----                             | -----                             | 409  |
| SIMLO10_FRUIT       | -----                             | -----                             | -----                     | -----                             | -----                             | 409  |
|                     | 1,260                             |                                   | 1,280                     |                                   | 1,300                             |      |
| gDNA_Solyc02g083720 | <b>TTACTACATC</b>                 | <b>TAATACTCAT</b>                 | <b>CAATTACAAG</b>         | <b>ATTGGTCGCG</b>                 | <b>CTAAGAAGCA</b>                 | 1300 |
| cDNA_Solyc02g083720 | -----                             | -----                             | -----                     | -----                             | -----                             | 578  |
| SIMLO10_LEAF        | -----                             | -----                             | -----                     | -----                             | -----                             | 409  |
| SIMLO10_ROOTS       | -----                             | -----                             | -----                     | -----                             | -----                             | 409  |
| SIMLO10_FLOWER      | -----                             | -----                             | -----                     | -----                             | -----                             | 409  |
| SIMLO10_FRUIT       | -----                             | -----                             | -----                     | -----                             | -----                             | 409  |
|                     | 1,320                             |                                   | 1,340                     |                                   |                                   |      |
| gDNA_Solyc02g083720 | <b>AATTTTTTTG</b>                 | <b>GAAGTTTAAC</b>                 | <b>GTGCCTTGAA</b>         | <b>CTTGAAAATA</b>                 | <b>GGACTCATT</b>                  | 1350 |
| cDNA_Solyc02g083720 | -----                             | -----                             | -----                     | -----                             | -----                             | 578  |
| SIMLO10_LEAF        | -----                             | -----                             | -----                     | -----                             | -----                             | 409  |
| SIMLO10_ROOTS       | -----                             | -----                             | -----                     | -----                             | -----                             | 409  |
| SIMLO10_FLOWER      | -----                             | -----                             | -----                     | -----                             | -----                             | 409  |
| SIMLO10_FRUIT       | -----                             | -----                             | -----                     | -----                             | -----                             | 409  |
|                     | 1,360                             |                                   | 1,380                     |                                   | 1,400                             |      |
| gDNA_Solyc02g083720 | <b>AGACAAAGAC</b>                 | <b>TCCTCCGGAC</b>                 | <b>TCCCTAGGTC</b>         | <b>AGGCAACTAG</b>                 | <b>TGAAGCTTGT</b>                 | 1400 |
| cDNA_Solyc02g083720 | -----                             | -----                             | -----                     | -----                             | -----                             | 578  |
| SIMLO10_LEAF        | -----                             | -----                             | -----                     | -----                             | -----                             | 409  |
| SIMLO10_ROOTS       | -----                             | -----                             | -----                     | -----                             | -----                             | 409  |
| SIMLO10_FLOWER      | -----                             | -----                             | -----                     | -----                             | -----                             | 409  |
| SIMLO10_FRUIT       | -----                             | -----                             | -----                     | -----                             | -----                             | 409  |
|                     | 1,420                             |                                   | 1,440                     |                                   |                                   |      |
| gDNA_Solyc02g083720 | <b>CTTTAGGAAG</b>                 | <b>AAAAAAGAAA</b>                 | <b>GGAAGTTCTC</b>         | <b>TCACATTTTC</b>                 | <b>TCATTTCAAT</b>                 | 1450 |
| cDNA_Solyc02g083720 | -----                             | -----                             | -----                     | -----                             | -----                             | 578  |
| SIMLO10_LEAF        | -----                             | -----                             | -----                     | -----                             | -----                             | 409  |
| SIMLO10_ROOTS       | -----                             | -----                             | -----                     | -----                             | -----                             | 409  |
| SIMLO10_FLOWER      | -----                             | -----                             | -----                     | -----                             | -----                             | 409  |
| SIMLO10_FRUIT       | -----                             | -----                             | -----                     | -----                             | -----                             | 409  |
|                     | 1,460                             |                                   | 1,480                     |                                   | 1,500                             |      |
| gDNA_Solyc02g083720 | <b>TAATTCTCTT</b>                 | <b>TGCAAGTTTC</b>                 | <b>AAATTGCTTT</b>         | <b>AGTAAAGTGG</b>                 | <b>CCAGGGCTTG</b>                 | 1500 |
| cDNA_Solyc02g083720 | -----                             | -----                             | -----                     | -----                             | -----                             | 578  |
| SIMLO10_LEAF        | -----                             | -----                             | -----                     | -----                             | -----                             | 409  |
| SIMLO10_ROOTS       | -----                             | -----                             | -----                     | -----                             | -----                             | 409  |
| SIMLO10_FLOWER      | -----                             | -----                             | -----                     | -----                             | -----                             | 409  |
| SIMLO10_FRUIT       | -----                             | -----                             | -----                     | -----                             | -----                             | 409  |
|                     | 1,520                             |                                   | 1,540                     |                                   |                                   |      |
| gDNA_Solyc02g083720 | <b>TACTGGATT</b>                  | <b>ATATGAGCAG</b>                 | <b>AGAACA</b> <b>CTCA</b> | <b>TGTTGATTT</b>                  | <b>ACCAGG</b> <b>GTCT</b>         | 1550 |
| cDNA_Solyc02g083720 | -----                             | -----                             | -----                     | -----                             | ----- <b>GTCT</b>                 | 582  |
| SIMLO10_LEAF        | -----                             | -----                             | -----                     | -----                             | ----- <b>GTCC</b>                 | 413  |
| SIMLO10_ROOTS       | -----                             | -----                             | -----                     | -----                             | ----- <b>GTCT</b>                 | 413  |
| SIMLO10_FLOWER      | -----                             | -----                             | -----                     | -----                             | ----- <b>GTCT</b>                 | 413  |
| SIMLO10_FRUIT       | -----                             | -----                             | -----                     | -----                             | ----- <b>GTCT</b>                 | 413  |
|                     | 1,560                             |                                   | 1,580                     |                                   | 1,600                             |      |
| gDNA_Solyc02g083720 | <b>CCAA</b> <b>TCGTT</b>          | <b>GC</b> <b>TCGAAG</b>           | <b>AGAGCC</b> <b>TGGA</b> | <b>GCAGC</b> <b>TCCAT</b>         | <b>CGCT</b> <b>TTTTGC</b>         | 1600 |
| cDNA_Solyc02g083720 | <b>CCAA</b> <b>TCGTT</b>          | <b>GC</b> <b>TCGAAG</b>           | <b>AGAGCC</b> <b>TGGA</b> | <b>GCAGC</b> <b>TCCAT</b>         | <b>CGCT</b> <b>TTTTGC</b>         | 632  |
| SIMLO10_LEAF        | <b>CCAA</b> <b>TCGTT</b>          | <b>GC</b> <b>TCGAAG</b>           | <b>GGAGCC</b> <b>TGGA</b> | <b>GCAGC</b> <b>TCCAT</b>         | <b>CGCT</b> <b>TTTTGC</b>         | 463  |
| SIMLO10_ROOTS       | <b>CCAA</b> <b>TCGTT</b>          | <b>GC</b> <b>TCGAAG</b>           | <b>AGAGCC</b> <b>TGGA</b> | <b>GCAGC</b> <b>TCCAT</b>         | <b>CGCT</b> <b>TTTTGC</b>         | 463  |
| SIMLO10_FLOWER      | <b>CCAA</b> <b>TCGTT</b>          | <b>GC</b> <b>TCGAAG</b>           | <b>AGAGCC</b> <b>TGGA</b> | <b>GCAGC</b> <b>TCCAT</b>         | <b>CGCT</b> <b>TTTTGC</b>         | 463  |
| SIMLO10_FRUIT       | <b>CCAA</b> <b>TCGTT</b>          | <b>GCT</b> <b>TCGAAG</b>          | <b>AGAGCC</b> <b>TGGA</b> | <b>GCAGC</b> <b>TCCAT</b>         | <b>CGCT</b> <b>TTTTGC</b>         | 463  |
|                     | 1,620                             |                                   | 1,640                     |                                   |                                   |      |
| gDNA_Solyc02g083720 | <b>TTGT</b> <b>CCTCGG</b>         | <b>TGTT</b> <b>AGCCAT</b>         | <b>GTAT</b> <b>CGTATA</b> | <b>GCT</b> <b>TTTTTGC</b>         | <b>CATT</b> <b>GCCCTG</b>         | 1650 |
| cDNA_Solyc02g083720 | <b>TTGT</b> <b>CCTCGG</b>         | <b>TGTT</b> <b>AGCCAT</b>         | <b>GTAT</b> <b>CGTATA</b> | <b>GCT</b> <b>TTTTTGC</b>         | <b>CATT</b> <b>GCCCTG</b>         | 682  |
| SIMLO10_LEAF        | <b>TTGT</b> <b>CCTCGG</b>         | <b>TGTT</b> <b>AGCCAT</b>         | <b>GTAT</b> <b>CGTATA</b> | <b>GCT</b> <b>TTTTTGC</b>         | <b>CATT</b> <b>GCCCTG</b>         | 513  |
| SIMLO10_ROOTS       | <b>TTGT</b> <b>CCTCGG</b>         | <b>TGTT</b> <b>AGCCAT</b>         | <b>GTAT</b> <b>CGTATA</b> | <b>GCT</b> <b>TTTTTGC</b>         | <b>CATT</b> <b>GCCCTG</b>         | 513  |
| SIMLO10_FLOWER      | <b>TTGT</b> <b>CCTCGG</b>         | <b>TGTT</b> <b>AGCCAT</b>         | <b>GTAT</b> <b>CGTATA</b> | <b>GCT</b> <b>TTTTTGC</b>         | <b>CATT</b> <b>GCCCTG</b>         | 513  |
| SIMLO10_FRUIT       | <b>TTGT</b> <b>CCTCGG</b>         | <b>TGTT</b> <b>AGCCAT</b>         | <b>GTAT</b> <b>CGTATA</b> | <b>GCT</b> <b>TTTTTGC</b>         | <b>CATT</b> <b>GCCCTG</b>         | 513  |
|                     | 1,660                             |                                   | 1,680                     |                                   | 1,700                             |      |
| gDNA_Solyc02g083720 | <b>GCAAT</b> <b>GTATCA</b>        | <b>AG</b> <b>TTGGATA</b>          | <b>TCT</b> <b>TCTCAT</b>  | <b>GATT</b> <b>AACCTC</b>         | <b>TTATT</b> <b>ACATC</b>         | 1700 |
| cDNA_Solyc02g083720 | <b>GCAAT</b> <b>GTATCA</b>        | <b>AG</b>                         | -----                     | -----                             | -----                             | 694  |
| SIMLO10_LEAF        | <b>GCAAT</b> <b>GTATCA</b>        | <b>AG</b>                         | -----                     | -----                             | -----                             | 525  |
| SIMLO10_ROOTS       | <b>GCAAT</b> <b>GTATCA</b>        | <b>AG</b>                         | -----                     | -----                             | -----                             | 525  |
| SIMLO10_FLOWER      | <b>GCAAT</b> <b>GTATCA</b>        | <b>AG</b>                         | -----                     | -----                             | -----                             | 525  |
| SIMLO10_FRUIT       | <b>GCAAT</b> <b>GTATCA</b>        | <b>AG</b>                         | -----                     | -----                             | -----                             | 525  |
|                     | 1,720                             |                                   | 1,740                     |                                   |                                   |      |
| gDNA_Solyc02g083720 | <b>TCAA</b> <b>AAC</b> <b>TTT</b> | <b>CTT</b> <b>CTCAAAT</b>         | <b>CCAT</b> <b>CAAGAA</b> | <b>ACAT</b> <b>GAA</b> <b>TTA</b> | <b>ACCA</b> <b>TGCAGA</b>         | 1750 |
| cDNA_Solyc02g083720 | -----                             | -----                             | -----                     | -----                             | ----- <b>A</b>                    | 695  |
| SIMLO10_LEAF        | -----                             | -----                             | -----                     | -----                             | ----- <b>A</b>                    | 526  |
| SIMLO10_ROOTS       | -----                             | -----                             | -----                     | -----                             | ----- <b>A</b>                    | 526  |
| SIMLO10_FLOWER      | -----                             | -----                             | -----                     | -----                             | ----- <b>A</b>                    | 526  |
| SIMLO10_FRUIT       | -----                             | -----                             | -----                     | -----                             | ----- <b>A</b>                    | 526  |
|                     | 1,760                             |                                   | 1,780                     |                                   | 1,800                             |      |
| gDNA_Solyc02g083720 | <b>TAT</b> <b>ATAGCTG</b>         | <b>GAGA</b> <b>ACA</b> <b>TGG</b> | <b>GAGA</b> <b>ACTATG</b> | <b>CCA</b> <b>AG</b> <b>TCGAT</b> | <b>TGCT</b> <b>C</b> <b>TTCAA</b> | 1800 |
| cDNA_Solyc02g083720 | <b>TAT</b> <b>ATAGCTG</b>         | <b>GAGA</b> <b>ACA</b> <b>TGG</b> | <b>GAGA</b> <b>ACTATG</b> | <b>CCA</b> <b>AG</b> <b>TCGAT</b> | <b>TGCT</b> <b>C</b> <b>TTCAA</b> | 745  |
| SIMLO10_LEAF        | <b>TAT</b> <b>ATAGCTG</b>         | <b>GAGA</b> <b>ACA</b> <b>TGG</b> | <b>GAGA</b> <b>ACTATG</b> | <b>CCA</b> <b>AG</b> <b>TCGAT</b> | <b>TGCT</b> <b>C</b> <b>TTCAA</b> | 576  |
| SIMLO10_ROOTS       | <b>TAT</b> <b>ATAGCTG</b>         | <b>GAGA</b> <b>ACA</b> <b>TGG</b> | <b>GAGA</b> <b>ACTATG</b> | <b>CCA</b> <b>AG</b> <b>TCGAT</b> | <b>TGCT</b> <b>C</b> <b>TTCAA</b> | 576  |
| SIMLO10_FLOWER      | <b>TAT</b> <b>ATAGCTG</b>         | <b>GAGA</b> <b>ACA</b> <b>TGG</b> | <b>GAGA</b> <b>ACTATG</b> | <b>CCA</b> <b>AG</b> <b>TCGAT</b> | <b>TGCT</b> <b>C</b> <b>TTCAA</b> | 576  |
| SIMLO10_FRUIT       | <b>TAT</b> <b>ATAGCTA</b>         | <b>GAGA</b> <b>ACA</b> <b>TGG</b> | <b>GAGA</b> <b>ACTATG</b> | <b>CCA</b> <b>AG</b> <b>TCGAT</b> | <b>TGCT</b> <b>C</b> <b>TTCAA</b> | 576  |

|                     |                    |                    |                    |                    |                   |
|---------------------|--------------------|--------------------|--------------------|--------------------|-------------------|
|                     |                    | 1,820              |                    | 1,840              |                   |
| gDNA_Solyc02g083720 | <b>AGACTAGAAG</b>  | <b>GTGCTAAAAT</b>  | <b>TTCAGCCAT</b>   | <b>ACTACTATTC</b>  | <b>TTCATACTTT</b> |
| cDNA_Solyc02g083720 | AGACTAGAAG         | GT                 |                    |                    |                   |
| SIMLO10_LEAF        | AGACTAGAAG         | GT                 |                    |                    |                   |
| SIMLO10_ROOTS       | AGACTAGAAG         | GT                 |                    |                    |                   |
| SIMLO10_FLOWER      | AGACTAGAAG         | GT                 |                    |                    |                   |
| SIMLO10_FRUIT       | AGACTAGAAG         | GT                 |                    |                    |                   |
|                     | 1,860              | 1,880              | 1,900              |                    |                   |
| gDNA_Solyc02g083720 | <b>ATTTATCATT</b>  | <b>TCCAGGACAC</b>  | <b>TTACTTGCAA</b>  | <b>GTTTAACCTT</b>  | <b>AGGTTCTGAA</b> |
| cDNA_Solyc02g083720 |                    |                    |                    |                    | <b>TCTGAA</b>     |
| SIMLO10_LEAF        |                    |                    |                    |                    | <b>TCTGAA</b>     |
| SIMLO10_ROOTS       |                    |                    |                    |                    | <b>TCTGAA</b>     |
| SIMLO10_FLOWER      |                    |                    |                    |                    | <b>TCTGAA</b>     |
| SIMLO10_FRUIT       |                    |                    |                    |                    | <b>TCTGAA</b>     |
|                     | 1,920              | 1,940              |                    |                    |                   |
| gDNA_Solyc02g083720 | <b>GAAGCTGTCC</b>  | <b>CAAACAA TAC</b> | <b>GAGAATGGGA</b>  | <b>CGTCTATCAA</b>  | <b>CTTTTACTTT</b> |
| cDNA_Solyc02g083720 | GAAGCTGTCC         | CAAACAA TAC        | GAGAATGGGA         | CGTCTATCAA         | CTTTTACTTT        |
| SIMLO10_LEAF        | GAAGCTGTCC         | CAAACAA TAC        | GAGAATGGGA         | CGTCTATCAA         | CTTTTACTTT        |
| SIMLO10_ROOTS       | GAAGCTGTCC         | CAAACAA TAC        | GAGAATGGGA         | CGTCTATCAA         | CTTTTACTTT        |
| SIMLO10_FLOWER      | GAAGCTGTCC         | CAAACAA TAC        | GAGAATGGGA         | CGTCTATCAA         | CTTTTACTTT        |
| SIMLO10_FRUIT       | GAAGCTGTCC         | CAAACAA TAC        | GAGAATGGGA         | CGTCTATCAA         | CTTTTACTTT        |
|                     | 1,960              | 1,980              | 2,000              |                    |                   |
| gDNA_Solyc02g083720 | <b>TCACCAGACC</b>  | <b>ACTCATCCAT</b>  | <b>GGAGCCAGCA</b>  | <b>CAGAGCTCTT</b>  | <b>GTTTGGCTGG</b> |
| cDNA_Solyc02g083720 | TCACCAGACC         | ACTCATCCAT         | GGAGCCAGCA         | CAGAGCTCTT         | GTTTGGCTG         |
| SIMLO10_LEAF        | TCACCAGACC         | ACTCATCCAT         | GGAGCCAGCA         | CAGAGCTCTT         | GTTTGGCTG         |
| SIMLO10_ROOTS       | TCACCAGACC         | ACTCATCCAT         | GGAGCCAGCA         | CAGAGCTCTT         | GTTTGGCTG         |
| SIMLO10_FLOWER      | TCACCAGACC         | ACTCATCCAT         | GGAGCCAGCA         | CAGAGCTCTT         | GTTTGGCTG         |
| SIMLO10_FRUIT       | TCACCAGACC         | ACTCATCCAT         | GGAGCCAGCA         | CAGAGCTCTT         | GTTTGGCTG         |
|                     | 2,020              | 2,040              |                    |                    |                   |
| gDNA_Solyc02g083720 | <b>TATTTACGGA</b>  | <b>CGAATCTTGT</b>  | <b>TTATCTGGTT</b>  | <b>GAGTGAATCC</b>  | <b>TTGTTATGTG</b> |
| cDNA_Solyc02g083720 |                    |                    |                    |                    |                   |
| SIMLO10_LEAF        |                    |                    |                    |                    |                   |
| SIMLO10_ROOTS       |                    |                    |                    |                    |                   |
| SIMLO10_FLOWER      |                    |                    |                    |                    |                   |
| SIMLO10_FRUIT       |                    |                    |                    |                    |                   |
|                     | 2,060              | 2,080              | 2,100              |                    |                   |
| gDNA_Solyc02g083720 | <b>AAATGCTTCT</b>  | <b>TCTATCTCAA</b>  | <b>TTTAAGGGGA</b>  | <b>GTTATCATAG</b>  | <b>CCCAGTGGTG</b> |
| cDNA_Solyc02g083720 |                    |                    |                    |                    |                   |
| SIMLO10_LEAF        |                    |                    |                    |                    |                   |
| SIMLO10_ROOTS       |                    |                    |                    |                    |                   |
| SIMLO10_FLOWER      |                    |                    |                    |                    |                   |
| SIMLO10_FRUIT       |                    |                    |                    |                    |                   |
|                     | 2,120              | 2,140              |                    |                    |                   |
| gDNA_Solyc02g083720 | <b>GAGGTATCTC</b>  | <b>AGTCATTGAA</b>  | <b>AAGGGTTCTG</b>  | <b>GACAACCTGTG</b> | <b>TACATTTGTT</b> |
| cDNA_Solyc02g083720 |                    |                    |                    |                    |                   |
| SIMLO10_LEAF        |                    |                    |                    |                    |                   |
| SIMLO10_ROOTS       |                    |                    |                    |                    |                   |
| SIMLO10_FLOWER      |                    |                    |                    |                    |                   |
| SIMLO10_FRUIT       |                    |                    |                    |                    |                   |
|                     | 2,160              | 2,180              | 2,200              |                    |                   |
| gDNA_Solyc02g083720 | <b>CTGGACAAGT</b>  | <b>GCGGGGAGAA</b>  | <b>GTGTTAACAT</b>  | <b>GTACACAATA</b>  | <b>AGAAGATGAA</b> |
| cDNA_Solyc02g083720 |                    |                    |                    |                    |                   |
| SIMLO10_LEAF        |                    |                    |                    |                    |                   |
| SIMLO10_ROOTS       |                    |                    |                    |                    |                   |
| SIMLO10_FLOWER      |                    |                    |                    |                    |                   |
| SIMLO10_FRUIT       |                    |                    |                    |                    |                   |
|                     | 2,220              | 2,240              |                    |                    |                   |
| gDNA_Solyc02g083720 | <b>AAACTAAAAA</b>  | <b>TTAATATAGA</b>  | <b>ATATCAAATT</b>  | <b>CAAGGTTGCT</b>  | <b>TTTGCAGCTA</b> |
| cDNA_Solyc02g083720 |                    |                    |                    |                    |                   |
| SIMLO10_LEAF        |                    |                    |                    |                    |                   |
| SIMLO10_ROOTS       |                    |                    |                    |                    |                   |
| SIMLO10_FLOWER      |                    |                    |                    |                    |                   |
| SIMLO10_FRUIT       |                    |                    |                    |                    |                   |
|                     | 2,260              | 2,280              | 2,300              |                    |                   |
| gDNA_Solyc02g083720 | <b>AAACTATGAT</b>  | <b>TTAGGGTGAT</b>  | <b>ACTAATCGGC</b>  | <b>AATGTCATTC</b>  | <b>ACTAATTCTA</b> |
| cDNA_Solyc02g083720 |                    |                    |                    |                    |                   |
| SIMLO10_LEAF        |                    |                    |                    |                    |                   |
| SIMLO10_ROOTS       |                    |                    |                    |                    |                   |
| SIMLO10_FLOWER      |                    |                    |                    |                    |                   |
| SIMLO10_FRUIT       |                    |                    |                    |                    |                   |
|                     | 2,320              | 2,340              |                    |                    |                   |
| gDNA_Solyc02g083720 | <b>TGACTATGCA</b>  | <b>AACAATCATT</b>  | <b>GTTCACTCAG</b>  | <b>GTCCAAGTCA</b>  | <b>CAAATCTTAA</b> |
| cDNA_Solyc02g083720 |                    |                    |                    |                    |                   |
| SIMLO10_LEAF        |                    |                    |                    |                    |                   |
| SIMLO10_ROOTS       |                    |                    |                    |                    |                   |
| SIMLO10_FLOWER      |                    |                    |                    |                    |                   |
| SIMLO10_FRUIT       |                    |                    |                    |                    |                   |
|                     | 2,360              | 2,380              | 2,400              |                    |                   |
| gDNA_Solyc02g083720 | <b>CAACTACTGTA</b> | <b>GAATTATGTT</b>  | <b>TAGGTCCTTAC</b> | <b>ATTTGCTGTT</b>  | <b>ACTTTAATTC</b> |
| cDNA_Solyc02g083720 |                    |                    |                    |                    |                   |
| SIMLO10_LEAF        |                    |                    |                    |                    |                   |
| SIMLO10_ROOTS       |                    |                    |                    |                    |                   |
| SIMLO10_FLOWER      |                    |                    |                    |                    |                   |
| SIMLO10_FRUIT       |                    |                    |                    |                    |                   |

|                     |                   |                   |                   |                   |                   |
|---------------------|-------------------|-------------------|-------------------|-------------------|-------------------|
|                     |                   | 2,420             |                   | 2,440             |                   |
| gDNA_Solyc02g083720 | <b>ACGTATTCAG</b> | <b>AAAGAATTAT</b> | <b>TGTAACCAG</b>  | <b>TGCATCAAAG</b> | <b>CATATTCATA</b> |
| cDNA_Solyc02g083720 | -----             | -----             | -----             | -----             | -----             |
| SIMLO10_LEAF        | -----             | -----             | -----             | -----             | -----             |
| SIMLO10_ROOTS       | -----             | -----             | -----             | -----             | -----             |
| SIMLO10_FLOWER      | -----             | -----             | -----             | -----             | -----             |
| SIMLO10_FRUIT       | -----             | -----             | -----             | -----             | -----             |
|                     | 2,460             |                   | 2,480             |                   | 2,500             |
| gDNA_Solyc02g083720 | <b>TGTCCTGCTT</b> | <b>GTATTGGCAT</b> | <b>CAATCAAATT</b> | <b>TAATAATTTT</b> | <b>CTCTTATCAT</b> |
| cDNA_Solyc02g083720 | -----             | -----             | -----             | -----             | -----             |
| SIMLO10_LEAF        | -----             | -----             | -----             | -----             | -----             |
| SIMLO10_ROOTS       | -----             | -----             | -----             | -----             | -----             |
| SIMLO10_FLOWER      | -----             | -----             | -----             | -----             | -----             |
| SIMLO10_FRUIT       | -----             | -----             | -----             | -----             | -----             |
|                     |                   | 2,520             |                   | 2,540             |                   |
| gDNA_Solyc02g083720 | <b>TATGTACGTC</b> | <b>TGACGAAAT</b>  | <b>TTCACCTTCA</b> | <b>TGCTTTAATC</b> | <b>TTCACAACCT</b> |
| cDNA_Solyc02g083720 | -----             | -----             | -----             | -----             | -----             |
| SIMLO10_LEAF        | -----             | -----             | -----             | -----             | -----             |
| SIMLO10_ROOTS       | -----             | -----             | -----             | -----             | -----             |
| SIMLO10_FLOWER      | -----             | -----             | -----             | -----             | -----             |
| SIMLO10_FRUIT       | -----             | -----             | -----             | -----             | -----             |
|                     | 2,560             |                   | 2,580             |                   | 2,600             |
| gDNA_Solyc02g083720 | <b>CTTGAGTCTT</b> | <b>GACAAGTGAT</b> | <b>GCAATGAGTC</b> | <b>CAGTGATTCA</b> | <b>AGATATTTAA</b> |
| cDNA_Solyc02g083720 | -----             | -----             | -----             | -----             | -----             |
| SIMLO10_LEAF        | -----             | -----             | -----             | -----             | -----             |
| SIMLO10_ROOTS       | -----             | -----             | -----             | -----             | -----             |
| SIMLO10_FLOWER      | -----             | -----             | -----             | -----             | -----             |
| SIMLO10_FRUIT       | -----             | -----             | -----             | -----             | -----             |
|                     |                   | 2,620             |                   | 2,640             |                   |
| gDNA_Solyc02g083720 | <b>TTCCATATTC</b> | <b>CCTTTTACG</b>  | <b>TTTGTTCAG</b>  | <b>CCGCCAGTTC</b> | <b>TGGAGTTCTA</b> |
| cDNA_Solyc02g083720 | -----             | -----             | -----             | -----             | -----             |
| SIMLO10_LEAF        | -----             | -----             | -----             | -----             | -----             |
| SIMLO10_ROOTS       | -----             | -----             | -----             | -----             | -----             |
| SIMLO10_FLOWER      | -----             | -----             | -----             | -----             | -----             |
| SIMLO10_FRUIT       | -----             | -----             | -----             | -----             | -----             |
|                     | 2,660             |                   | 2,680             |                   | 2,700             |
| gDNA_Solyc02g083720 | <b>TAAATGAAGC</b> | <b>TGACTACATG</b> | <b>GCTTTGCGCT</b> | <b>TGGGTTTTAT</b> | <b>TACTGTAAGT</b> |
| cDNA_Solyc02g083720 | -----             | -----             | -----             | -----             | -----             |
| SIMLO10_LEAF        | -----             | -----             | -----             | -----             | -----             |
| SIMLO10_ROOTS       | -----             | -----             | -----             | -----             | -----             |
| SIMLO10_FLOWER      | -----             | -----             | -----             | -----             | -----             |
| SIMLO10_FRUIT       | -----             | -----             | -----             | -----             | -----             |
|                     |                   | 2,720             |                   | 2,740             |                   |
| gDNA_Solyc02g083720 | <b>CATGATTGT</b>  | <b>TATACTTAC</b>  | <b>AAATGCAAAT</b> | <b>ATTTCACTCA</b> | <b>ATCGTCATTA</b> |
| cDNA_Solyc02g083720 | -----             | -----             | -----             | -----             | -----             |
| SIMLO10_LEAF        | -----             | -----             | -----             | -----             | -----             |
| SIMLO10_ROOTS       | -----             | -----             | -----             | -----             | -----             |
| SIMLO10_FLOWER      | -----             | -----             | -----             | -----             | -----             |
| SIMLO10_FRUIT       | -----             | -----             | -----             | -----             | -----             |
|                     | 2,760             |                   | 2,780             |                   | 2,800             |
| gDNA_Solyc02g083720 | <b>AACTTGAAG</b>  | <b>TGAAGACTGA</b> | <b>CTGACTTTCT</b> | <b>ATGGCTGACT</b> | <b>TCATGCTGCC</b> |
| cDNA_Solyc02g083720 | -----             | -----             | -----             | -----             | -----             |
| SIMLO10_LEAF        | -----             | -----             | -----             | -----             | -----             |
| SIMLO10_ROOTS       | -----             | -----             | -----             | -----             | -----             |
| SIMLO10_FLOWER      | -----             | -----             | -----             | -----             | -----             |
| SIMLO10_FRUIT       | -----             | -----             | -----             | -----             | -----             |
|                     |                   | 2,820             |                   | 2,840             |                   |
| gDNA_Solyc02g083720 | <b>CCCGTTTATA</b> | <b>ACAAATATAA</b> | <b>TCAGTTATTA</b> | <b>ATCATATTTG</b> | <b>AATTTTGGTT</b> |
| cDNA_Solyc02g083720 | -----             | -----             | -----             | -----             | -----             |
| SIMLO10_LEAF        | -----             | -----             | -----             | -----             | -----             |
| SIMLO10_ROOTS       | -----             | -----             | -----             | -----             | -----             |
| SIMLO10_FLOWER      | -----             | -----             | -----             | -----             | -----             |
| SIMLO10_FRUIT       | -----             | -----             | -----             | -----             | -----             |
|                     | 2,860             |                   | 2,880             |                   | 2,900             |
| gDNA_Solyc02g083720 | <b>ATTTTATGAA</b> | <b>AATGACTCTT</b> | <b>TAAGCTAATA</b> | <b>ACCACTTAAT</b> | <b>ACAACATTCA</b> |
| cDNA_Solyc02g083720 | -----             | -----             | -----             | -----             | -----             |
| SIMLO10_LEAF        | -----             | -----             | -----             | -----             | -----             |
| SIMLO10_ROOTS       | -----             | -----             | -----             | -----             | -----             |
| SIMLO10_FLOWER      | -----             | -----             | -----             | -----             | -----             |
| SIMLO10_FRUIT       | -----             | -----             | -----             | -----             | -----             |
|                     |                   | 2,920             |                   | 2,940             |                   |
| gDNA_Solyc02g083720 | <b>CTTATGTAGA</b> | <b>TGATGTGAAT</b> | <b>AAATACCAAG</b> | <b>TAGGCCCTAA</b> | <b>TTTTGGTACT</b> |
| cDNA_Solyc02g083720 | -----             | -----             | -----             | -----             | -----             |
| SIMLO10_LEAF        | -----             | -----             | -----             | -----             | -----             |
| SIMLO10_ROOTS       | -----             | -----             | -----             | -----             | -----             |
| SIMLO10_FLOWER      | -----             | -----             | -----             | -----             | -----             |
| SIMLO10_FRUIT       | -----             | -----             | -----             | -----             | -----             |
|                     | 2,960             |                   | 2,980             |                   | 3,000             |
| gDNA_Solyc02g083720 | <b>TCTATGTTGT</b> | <b>TCCACTGATT</b> | <b>AAGTCTCTT</b>  | <b>TATTAATAGA</b> | <b>AGCATTTTTA</b> |
| cDNA_Solyc02g083720 | -----             | -----             | -----             | -----             | -----             |
| SIMLO10_LEAF        | -----             | -----             | -----             | -----             | -----             |
| SIMLO10_ROOTS       | -----             | -----             | -----             | -----             | -----             |
| SIMLO10_FLOWER      | -----             | -----             | -----             | -----             | -----             |
| SIMLO10_FRUIT       | -----             | -----             | -----             | -----             | -----             |

|                     |                   |                   |                   |                   |                   |
|---------------------|-------------------|-------------------|-------------------|-------------------|-------------------|
|                     |                   | 3,020             |                   | 3,040             |                   |
| gDNA_Solyc02g083720 | <b>CTAATCCATG</b> | <b>AAACAAAGGG</b> | <b>CTCGCTATCT</b> | <b>AAAATTACAG</b> | <b>TGACTTCCTA</b> |
| cDNA_Solyc02g083720 | -----             | -----             | -----             | -----             | -----             |
| SIMLO10_LEAF        | -----             | -----             | -----             | -----             | -----             |
| SIMLO10_ROOTS       | -----             | -----             | -----             | -----             | -----             |
| SIMLO10_FLOWER      | -----             | -----             | -----             | -----             | -----             |
| SIMLO10_FRUIT       | -----             | -----             | -----             | -----             | -----             |
|                     | 3,060             |                   | 3,080             |                   | 3,100             |
| gDNA_Solyc02g083720 | <b>CTGCCAAATG</b> | <b>TATTTGTTGT</b> | <b>TGTTGCGATA</b> | <b>TCAGGATTTA</b> | <b>CACCTCTATA</b> |
| cDNA_Solyc02g083720 | -----             | -----             | -----             | -----             | -----             |
| SIMLO10_LEAF        | -----             | -----             | -----             | -----             | -----             |
| SIMLO10_ROOTS       | -----             | -----             | -----             | -----             | -----             |
| SIMLO10_FLOWER      | -----             | -----             | -----             | -----             | -----             |
| SIMLO10_FRUIT       | -----             | -----             | -----             | -----             | -----             |
|                     |                   | 3,120             |                   | 3,140             |                   |
| gDNA_Solyc02g083720 | <b>TATCCCTTTG</b> | <b>ACAGAAAAAC</b> | <b>AAGTTCGTGT</b> | <b>CTTTATATTG</b> | <b>TTATTGTGGT</b> |
| cDNA_Solyc02g083720 | -----             | -----             | -----             | -----             | -----             |
| SIMLO10_LEAF        | -----             | -----             | -----             | -----             | -----             |
| SIMLO10_ROOTS       | -----             | -----             | -----             | -----             | -----             |
| SIMLO10_FLOWER      | -----             | -----             | -----             | -----             | -----             |
| SIMLO10_FRUIT       | -----             | -----             | -----             | -----             | -----             |
|                     | 3,160             |                   | 3,180             |                   | 3,200             |
| gDNA_Solyc02g083720 | <b>CTTGCAACT</b>  | <b>CATCAGCTGC</b> | <b>CATTAACCTA</b> | <b>TGATTCCAT</b>  | <b>AAGTATATGC</b> |
| cDNA_Solyc02g083720 | -----             | -----             | -----             | -----             | -----             |
| SIMLO10_LEAF        | -----             | -----             | -----             | -----             | -----             |
| SIMLO10_ROOTS       | -----             | -----             | -----             | -----             | -----             |
| SIMLO10_FLOWER      | -----             | -----             | -----             | -----             | -----             |
| SIMLO10_FRUIT       | -----             | -----             | -----             | -----             | -----             |
|                     |                   | 3,220             |                   | 3,240             |                   |
| gDNA_Solyc02g083720 | <b>TTCGAAGCAT</b> | <b>GGAGGAAGAA</b> | <b>TTTCGTGATA</b> | <b>TTGTTGGCAT</b> | <b>AAGGTACAA</b>  |
| cDNA_Solyc02g083720 | -----             | -----             | -----             | -----             | -----             |
| SIMLO10_LEAF        | -----             | -----             | -----             | -----             | -----             |
| SIMLO10_ROOTS       | -----             | -----             | -----             | -----             | -----             |
| SIMLO10_FLOWER      | -----             | -----             | -----             | -----             | -----             |
| SIMLO10_FRUIT       | -----             | -----             | -----             | -----             | -----             |
|                     | 3,260             |                   | 3,280             |                   | 3,300             |
| gDNA_Solyc02g083720 | <b>GACATGTCTA</b> | <b>TTTGAAGTTT</b> | <b>AAGTTTATGT</b> | <b>TTTGAACATA</b> | <b>ACTTTTGTGT</b> |
| cDNA_Solyc02g083720 | -----             | -----             | -----             | -----             | -----             |
| SIMLO10_LEAF        | -----             | -----             | -----             | -----             | -----             |
| SIMLO10_ROOTS       | -----             | -----             | -----             | -----             | -----             |
| SIMLO10_FLOWER      | -----             | -----             | -----             | -----             | -----             |
| SIMLO10_FRUIT       | -----             | -----             | -----             | -----             | -----             |
|                     |                   | 3,320             |                   | 3,340             |                   |
| gDNA_Solyc02g083720 | <b>CACAATGTAA</b> | <b>CATTCACTAC</b> | <b>TAGGTCTTCC</b> | <b>AACATATGAA</b> | <b>TCATCCTACA</b> |
| cDNA_Solyc02g083720 | -----             | -----             | -----             | -----             | -----             |
| SIMLO10_LEAF        | -----             | -----             | -----             | -----             | -----             |
| SIMLO10_ROOTS       | -----             | -----             | -----             | -----             | -----             |
| SIMLO10_FLOWER      | -----             | -----             | -----             | -----             | -----             |
| SIMLO10_FRUIT       | -----             | -----             | -----             | -----             | -----             |
|                     | 3,360             |                   | 3,380             |                   | 3,400             |
| gDNA_Solyc02g083720 | <b>TGATGCCAGA</b> | <b>GCAATAATAA</b> | <b>CTCCATATAA</b> | <b>AATATCTGTA</b> | <b>GTCATACAGA</b> |
| cDNA_Solyc02g083720 | -----             | -----             | -----             | -----             | -----             |
| SIMLO10_LEAF        | -----             | -----             | -----             | -----             | -----             |
| SIMLO10_ROOTS       | -----             | -----             | -----             | -----             | -----             |
| SIMLO10_FLOWER      | -----             | -----             | -----             | -----             | -----             |
| SIMLO10_FRUIT       | -----             | -----             | -----             | -----             | -----             |
|                     |                   | 3,420             |                   | 3,440             |                   |
| gDNA_Solyc02g083720 | <b>TATATGTAAT</b> | <b>TGCTAGTTCT</b> | <b>GAGGTTACAC</b> | <b>AATTTATGTT</b> | <b>TCTTTTTTA</b>  |
| cDNA_Solyc02g083720 | -----             | -----             | -----             | -----             | -----             |
| SIMLO10_LEAF        | -----             | -----             | -----             | -----             | -----             |
| SIMLO10_ROOTS       | -----             | -----             | -----             | -----             | -----             |
| SIMLO10_FLOWER      | -----             | -----             | -----             | -----             | -----             |
| SIMLO10_FRUIT       | -----             | -----             | -----             | -----             | -----             |
|                     | 3,460             |                   | 3,480             |                   | 3,500             |
| gDNA_Solyc02g083720 | <b>TTACAGTTCC</b> | <b>GTGTTTCCAC</b> | <b>TTAATAGCTA</b> | <b>CAGCTATCAT</b> | <b>GTTTGGTTAA</b> |
| cDNA_Solyc02g083720 | -----             | -----             | -----             | -----             | -----             |
| SIMLO10_LEAF        | -----             | -----             | -----             | -----             | -----             |
| SIMLO10_ROOTS       | -----             | -----             | -----             | -----             | -----             |
| SIMLO10_FLOWER      | -----             | -----             | -----             | -----             | -----             |
| SIMLO10_FRUIT       | -----             | -----             | -----             | -----             | -----             |
|                     |                   | 3,520             |                   | 3,540             |                   |
| gDNA_Solyc02g083720 | <b>ACCAGTAAAG</b> | <b>ATGTTAAGAT</b> | <b>TGAATTCTTG</b> | <b>ACCCTCCTTG</b> | <b>GAGGGAGTAT</b> |
| cDNA_Solyc02g083720 | -----             | -----             | -----             | -----             | -----             |
| SIMLO10_LEAF        | -----             | -----             | -----             | -----             | -----             |
| SIMLO10_ROOTS       | -----             | -----             | -----             | -----             | -----             |
| SIMLO10_FLOWER      | -----             | -----             | -----             | -----             | -----             |
| SIMLO10_FRUIT       | -----             | -----             | -----             | -----             | -----             |
|                     | 3,560             |                   | 3,580             |                   | 3,600             |
| gDNA_Solyc02g083720 | <b>AAATATTGTC</b> | <b>TTTCTATTTT</b> | <b>TCTATTTTAT</b> | <b>CTTCACCAAC</b> | <b>AAGTTCTACT</b> |
| cDNA_Solyc02g083720 | -----             | -----             | -----             | -----             | -----             |
| SIMLO10_LEAF        | -----             | -----             | -----             | -----             | -----             |
| SIMLO10_ROOTS       | -----             | -----             | -----             | -----             | -----             |
| SIMLO10_FLOWER      | -----             | -----             | -----             | -----             | -----             |
| SIMLO10_FRUIT       | -----             | -----             | -----             | -----             | -----             |



|                     |                    |                   |                    |                   |                   |      |
|---------------------|--------------------|-------------------|--------------------|-------------------|-------------------|------|
|                     |                    |                   | 3,620              |                   | 3,640             |      |
| gDNA_Solyc02g083720 | <b>TCTATGTTTT</b>  | <b>ATGTTGCGCA</b> | <b>ACAAGAACCT</b>  | <b>TTCGTTTTAA</b> | <b>ATCTATAACT</b> | 3650 |
| cDNA_Solyc02g083720 | .....              | .....             | .....              | .....             | .....             | 1023 |
| SIMLO10_LEAF        | .....              | .....             | .....              | .....             | .....             | 854  |
| SIMLO10_ROOTS       | .....              | .....             | .....              | .....             | .....             | 854  |
| SIMLO10_FLOWER      | .....              | .....             | .....              | .....             | .....             | 854  |
| SIMLO10_FRUIT       | .....              | .....             | .....              | .....             | .....             | 854  |
|                     | 3,660              |                   | 3,680              |                   | 3,700             |      |
| gDNA_Solyc02g083720 | <b>TGGCCTTCCCT</b> | <b>ATCTTTCCCT</b> | <b>TCAACTAGAA</b>  | <b>TTAGTTATTT</b> | <b>TCTATCTCAT</b> | 3700 |
| cDNA_Solyc02g083720 | .....              | .....             | .....              | .....             | .....             | 1023 |
| SIMLO10_LEAF        | .....              | .....             | .....              | .....             | .....             | 854  |
| SIMLO10_ROOTS       | .....              | .....             | .....              | .....             | .....             | 854  |
| SIMLO10_FLOWER      | .....              | .....             | .....              | .....             | .....             | 854  |
| SIMLO10_FRUIT       | .....              | .....             | .....              | .....             | .....             | 854  |
|                     |                    |                   | 3,720              |                   | 3,740             |      |
| gDNA_Solyc02g083720 | <b>GGTAAAAAAA</b>  | <b>TAGCTGCTCC</b> | <b>ACGTGAACCTA</b> | <b>TAGTAAGTAC</b> | <b>TTATAACAGA</b> | 3750 |
| cDNA_Solyc02g083720 | .....              | .....             | .....              | .....             | .....             | 1023 |
| SIMLO10_LEAF        | .....              | .....             | .....              | .....             | .....             | 854  |
| SIMLO10_ROOTS       | .....              | .....             | .....              | .....             | .....             | 854  |
| SIMLO10_FLOWER      | .....              | .....             | .....              | .....             | .....             | 854  |
| SIMLO10_FRUIT       | .....              | .....             | .....              | .....             | .....             | 854  |
|                     | 3,760              |                   | 3,780              |                   | 3,800             |      |
| gDNA_Solyc02g083720 | <b>TTCTATGAGA</b>  | <b>ATTCATATAA</b> | <b>CTCATTCCAA</b>  | <b>TTTTCTGTTC</b> | <b>CTGACTGTCA</b> | 3800 |
| cDNA_Solyc02g083720 | .....              | .....             | .....              | .....             | .....             | 1023 |
| SIMLO10_LEAF        | .....              | .....             | .....              | .....             | .....             | 854  |
| SIMLO10_ROOTS       | .....              | .....             | .....              | .....             | .....             | 854  |
| SIMLO10_FLOWER      | .....              | .....             | .....              | .....             | .....             | 854  |
| SIMLO10_FRUIT       | .....              | .....             | .....              | .....             | .....             | 854  |
|                     |                    |                   | 3,820              |                   | 3,840             |      |
| gDNA_Solyc02g083720 | <b>TGATCAACAG</b>  | <b>TTAAAGCTTT</b> | <b>CCGTATCTCT</b>  | <b>AGGCATATAC</b> | <b>GATGTGTTGT</b> | 3850 |
| cDNA_Solyc02g083720 | .....              | .....             | .....              | .....             | .....             | 1023 |
| SIMLO10_LEAF        | .....              | .....             | .....              | .....             | .....             | 854  |
| SIMLO10_ROOTS       | .....              | .....             | .....              | .....             | .....             | 854  |
| SIMLO10_FLOWER      | .....              | .....             | .....              | .....             | .....             | 854  |
| SIMLO10_FRUIT       | .....              | .....             | .....              | .....             | .....             | 854  |
|                     | 3,860              |                   | 3,880              |                   | 3,900             |      |
| gDNA_Solyc02g083720 | <b>TTATTTCCAT</b>  | <b>TTATATGGTA</b> | <b>CTGTAAAGACA</b> | <b>AAAGCTGACA</b> | <b>TATATGTCCC</b> | 3900 |
| cDNA_Solyc02g083720 | .....              | .....             | .....              | .....             | .....             | 1023 |
| SIMLO10_LEAF        | .....              | .....             | .....              | .....             | .....             | 854  |
| SIMLO10_ROOTS       | .....              | .....             | .....              | .....             | .....             | 854  |
| SIMLO10_FLOWER      | .....              | .....             | .....              | .....             | .....             | 854  |
| SIMLO10_FRUIT       | .....              | .....             | .....              | .....             | .....             | 854  |
|                     |                    |                   | 3,920              |                   | 3,940             |      |
| gDNA_Solyc02g083720 | <b>TGTTGGAGGA</b>  | <b>CTAAATGCAA</b> | <b>TATTTACAAA</b>  | <b>ACTGTAAGAT</b> | <b>ACTATGGTTA</b> | 3950 |
| cDNA_Solyc02g083720 | .....              | .....             | .....              | .....             | .....             | 1023 |
| SIMLO10_LEAF        | .....              | .....             | .....              | .....             | .....             | 854  |
| SIMLO10_ROOTS       | .....              | .....             | .....              | .....             | .....             | 854  |
| SIMLO10_FLOWER      | .....              | .....             | .....              | .....             | .....             | 854  |
| SIMLO10_FRUIT       | .....              | .....             | .....              | .....             | .....             | 854  |
|                     | 3,960              |                   | 3,980              |                   | 4,000             |      |
| gDNA_Solyc02g083720 | <b>TGAAAGACA</b>   | <b>TCTAAGATAT</b> | <b>TCTATTTTTT</b>  | <b>TGGCTTTACT</b> | <b>GCACAATTTT</b> | 4000 |
| cDNA_Solyc02g083720 | .....              | .....             | .....              | .....             | .....             | 1023 |
| SIMLO10_LEAF        | .....              | .....             | .....              | .....             | .....             | 854  |
| SIMLO10_ROOTS       | .....              | .....             | .....              | .....             | .....             | 854  |
| SIMLO10_FLOWER      | .....              | .....             | .....              | .....             | .....             | 854  |
| SIMLO10_FRUIT       | .....              | .....             | .....              | .....             | .....             | 854  |
|                     |                    |                   | 4,020              |                   | 4,040             |      |
| gDNA_Solyc02g083720 | <b>ACTATGGATC</b>  | <b>CAGTCATCTA</b> | <b>AGACACTCCT</b>  | <b>TTTCTTTTTC</b> | <b>TTGCTGTCAG</b> | 4050 |
| cDNA_Solyc02g083720 | .....              | .....             | .....              | .....             | .....             | 1023 |
| SIMLO10_LEAF        | .....              | .....             | .....              | .....             | .....             | 854  |
| SIMLO10_ROOTS       | .....              | .....             | .....              | .....             | .....             | 854  |
| SIMLO10_FLOWER      | .....              | .....             | .....              | .....             | .....             | 854  |
| SIMLO10_FRUIT       | .....              | .....             | .....              | .....             | .....             | 854  |
|                     | 4,060              |                   | 4,080              |                   | 4,100             |      |
| gDNA_Solyc02g083720 | <b>TGTTCCACTA</b>  | <b>TGGATTTTCG</b> | <b>TCATAGTTTG</b>  | <b>TGTATTTTTA</b> | <b>AGCTTTCATG</b> | 4100 |
| cDNA_Solyc02g083720 | <b>TGTTCCACTA</b>  | <b>TGGATTTTCG</b> | <b>TCATAGTTTG</b>  | <b>TGTATTTTTA</b> | <b>AGCTTTCATG</b> | 1073 |
| SIMLO10_LEAF        | <b>TGTTCCACTA</b>  | <b>TGGATTTTCG</b> | <b>TCATAGTTTG</b>  | <b>TGTATTTTTA</b> | <b>AGCTTTCATG</b> | 904  |
| SIMLO10_ROOTS       | <b>TGTTCCACTA</b>  | <b>TGGATTTTCG</b> | <b>TCATAGTTTG</b>  | <b>TGTATTTTTA</b> | <b>AGCTTTCATG</b> | 904  |
| SIMLO10_FLOWER      | <b>TGTTCCACTA</b>  | <b>TGGATTTTCG</b> | <b>TCATAGTTTG</b>  | <b>TGTATTTTTA</b> | <b>AGCTTTCATG</b> | 904  |
| SIMLO10_FRUIT       | <b>TGTTCCACTA</b>  | <b>TGGATTTTCG</b> | <b>TCATAGTTTG</b>  | <b>TGTATTTTTA</b> | <b>AGCTTTCATG</b> | 904  |
|                     |                    |                   | 4,120              |                   | 4,140             |      |
| gDNA_Solyc02g083720 | <b>GTAACITTTTA</b> | <b>TCTACTAGAT</b> | <b>ATTATCAGGA</b>  | <b>ATTTCTGCCT</b> | <b>CGGAATGCTT</b> | 4150 |
| cDNA_Solyc02g083720 | <b>G</b> .....     | .....             | .....              | .....             | .....             | 1074 |
| SIMLO10_LEAF        | <b>G</b> .....     | .....             | .....              | .....             | .....             | 905  |
| SIMLO10_ROOTS       | <b>G</b> .....     | .....             | .....              | .....             | .....             | 905  |
| SIMLO10_FLOWER      | <b>G</b> .....     | .....             | .....              | .....             | .....             | 905  |
| SIMLO10_FRUIT       | <b>G</b> .....     | .....             | .....              | .....             | .....             | 905  |
|                     | 4,160              |                   | 4,180              |                   | 4,200             |      |
| gDNA_Solyc02g083720 | <b>TTTTCAGTAC</b>  | <b>AATTTTAATG</b> | <b>ATCATTGTCC</b>  | <b>AGGCACAAA</b>  | <b>ATCTACTTTT</b> | 4200 |
| cDNA_Solyc02g083720 | .....              | .....             | .....              | <b>-CACAAA</b>    | <b>ATCTACTTTT</b> | 1091 |
| SIMLO10_LEAF        | .....              | .....             | .....              | <b>-CACAAA</b>    | <b>ATCTACTTTT</b> | 922  |
| SIMLO10_ROOTS       | .....              | .....             | .....              | <b>-CACAAA</b>    | <b>ATCTACTTTT</b> | 922  |
| SIMLO10_FLOWER      | .....              | .....             | .....              | <b>-CACAAA</b>    | <b>ATCTACTTTT</b> | 922  |
| SIMLO10_FRUIT       | .....              | .....             | .....              | <b>-CACAAA</b>    | <b>ATCTACTTTT</b> | 922  |

|                     |                                                                |       |  |       |       |
|---------------------|----------------------------------------------------------------|-------|--|-------|-------|
|                     |                                                                | 4,220 |  | 4,240 |       |
| gDNA_Solyc02g083720 | <b>GGATCTCCTT CTTCCAGCT ATCGTAAGTC CTTGTTATTT GCTGTTCCAT</b>   |       |  |       | 4250  |
| cDNA_Solyc02g083720 | <b>GGATCTCCTT CTTCCAGCT ATC</b> -----                          |       |  |       | 1114  |
| SIMLO10_LEAF        | <b>GGATCTCCTT CTTCCAGCT ATC</b> -----                          |       |  |       | 945   |
| SIMLO10_ROOTS       | <b>GGATCTCCTT CTTCCAGCT ATC</b> -----                          |       |  |       | 945   |
| SIMLO10_FLOWER      | <b>GGATCTCCTT CTTCCAGCT ATC</b> -----                          |       |  |       | 945   |
| SIMLO10_FRUIT       | <b>GGATCTCCTT CTTCCAGCT ATC</b> -----                          |       |  |       | 945   |
|                     |                                                                | 4,260 |  | 4,280 | 4,300 |
| gDNA_Solyc02g083720 | <b>TTTTCATTTT GCTTCTGAAG AATAATTTGT TCTCATATTT CTGACTTTGT</b>  |       |  |       | 4300  |
| cDNA_Solyc02g083720 | -----                                                          |       |  |       | 1114  |
| SIMLO10_LEAF        | -----                                                          |       |  |       | 945   |
| SIMLO10_ROOTS       | -----                                                          |       |  |       | 945   |
| SIMLO10_FLOWER      | -----                                                          |       |  |       | 945   |
| SIMLO10_FRUIT       | -----                                                          |       |  |       | 945   |
|                     |                                                                | 4,320 |  | 4,340 |       |
| gDNA_Solyc02g083720 | <b>CAAAAATTGT TATTGGAAGT TAATCCTTTT GGTTGGTACC AAGCTTCATC</b>  |       |  |       | 4350  |
| cDNA_Solyc02g083720 | -----T <b>TAATCCTTTT GGTTGGTACC AAGCTTCATC</b>                 |       |  |       | 1145  |
| SIMLO10_LEAF        | -----T <b>TAATCCTTTT GGTTGGTACC AAGCTTCATC</b>                 |       |  |       | 976   |
| SIMLO10_ROOTS       | -----T <b>TAATCCTTTT GGTTGGTACC AAGCTTCATC</b>                 |       |  |       | 976   |
| SIMLO10_FLOWER      | -----T <b>TAATCCTTTT GGTTGGTACC AAGCTTCATC</b>                 |       |  |       | 976   |
| SIMLO10_FRUIT       | -----T <b>TAATCCTTTT GGTTGGTACC AAGCTTCATC</b>                 |       |  |       | 976   |
|                     |                                                                | 4,360 |  | 4,380 | 4,400 |
| gDNA_Solyc02g083720 | <b>GCGTGGTGGT CAAGCTGGCA GTTGAAATCA TTGACAGTAG TCCA TTGGAA</b> |       |  |       | 4400  |
| cDNA_Solyc02g083720 | <b>GCGTGGTGGT CAAGCTGGCA GTTGAAATCA TTGACAGTAG TCCA TTGGAA</b> |       |  |       | 1195  |
| SIMLO10_LEAF        | <b>GCGTGGTGGT CAAGCTGGCA GTTGAAATCA TTGACAGTAG TCCA TTGGAA</b> |       |  |       | 1026  |
| SIMLO10_ROOTS       | <b>GCGTGGTGGT CAAGCTGGCA GTTGAAATCA TTGACAGTAG TCCA TTGGAA</b> |       |  |       | 1026  |
| SIMLO10_FLOWER      | <b>GCGTGGTGGT CAAGCTGGCA GTTGAAATCA TTGACAGTAG TCCA TTGGAA</b> |       |  |       | 1026  |
| SIMLO10_FRUIT       | <b>GCGTGGTGGT CAAGCTGGCA GTTGAAATCA TTGACAGTAG TCCA TTGGAA</b> |       |  |       | 1026  |
|                     |                                                                | 4,420 |  | 4,440 |       |
| gDNA_Solyc02g083720 | <b>GGATTTTCATC AGTTCAACCT TAGAGATGAG CTCTTCTGGT TTGGGAAGCC</b> |       |  |       | 4450  |
| cDNA_Solyc02g083720 | <b>GGATTTTCATC AGTTCAACCT TAGAGATGAG CTCTTCTGGT TTGGGAAGCC</b> |       |  |       | 1245  |
| SIMLO10_LEAF        | <b>GGATTTTCATC AGTTCAACCT TAGAGATGAG CTCTTCTGGT TTGGGAAGCC</b> |       |  |       | 1076  |
| SIMLO10_ROOTS       | <b>GGATTTTCATC AGTTCAACCT TAGAGATGAG CTCTTCTGGT TTGGGAAGCC</b> |       |  |       | 1076  |
| SIMLO10_FLOWER      | <b>GGATTTTCATC AGTTCAACCT TAGAGATGAG CTCTTCTGGT TTGGGAAGCC</b> |       |  |       | 1076  |
| SIMLO10_FRUIT       | <b>GGATTTTCATC AGTTCAACCT TAGAGATGAG CTCTTCTGGT TTGGGAAGCC</b> |       |  |       | 1076  |
|                     |                                                                | 4,460 |  | 4,480 | 4,500 |
| gDNA_Solyc02g083720 | <b>TAGATTTCTG CTGCGGATAA TACAATTTGT ATCATTCCAG GTATGACCAA</b>  |       |  |       | 4500  |
| cDNA_Solyc02g083720 | <b>TAGATTTCTG CTGCGGATAA TACAATTTGT ATCATTCCAG</b> -----       |       |  |       | 1285  |
| SIMLO10_LEAF        | <b>TAGATTTCTG CTGCGGATAA TACAATTTGT ATCATTCCAG</b> -----       |       |  |       | 1116  |
| SIMLO10_ROOTS       | <b>TAGATTTCTG CTGCGGATAA TACAATTTGT ATCATTCCAG</b> -----       |       |  |       | 1116  |
| SIMLO10_FLOWER      | <b>TAGATTTCTG CTGCGGATAA TACAATTTGT ATCATTCCAG</b> -----       |       |  |       | 1116  |
| SIMLO10_FRUIT       | <b>TAGATTTCTG CTGCGGATAA TACAATTTGT ATCATTCCAG</b> -----       |       |  |       | 1116  |
|                     |                                                                | 4,520 |  | 4,540 |       |
| gDNA_Solyc02g083720 | <b>TAACATCTTT TTATCCTCGA ATCCAAATGG TAACAAGAAG AATATTACAA</b>  |       |  |       | 4550  |
| cDNA_Solyc02g083720 | -----                                                          |       |  |       | 1285  |
| SIMLO10_LEAF        | -----                                                          |       |  |       | 1116  |
| SIMLO10_ROOTS       | -----                                                          |       |  |       | 1116  |
| SIMLO10_FLOWER      | -----                                                          |       |  |       | 1116  |
| SIMLO10_FRUIT       | -----                                                          |       |  |       | 1116  |
|                     |                                                                | 4,560 |  | 4,580 | 4,600 |
| gDNA_Solyc02g083720 | <b>CTAATTTTTA GCTCAATGAT ATAGCGTCCT TGGATATGCT TTACTGATTG</b>  |       |  |       | 4600  |
| cDNA_Solyc02g083720 | -----                                                          |       |  |       | 1285  |
| SIMLO10_LEAF        | -----                                                          |       |  |       | 1116  |
| SIMLO10_ROOTS       | -----                                                          |       |  |       | 1116  |
| SIMLO10_FLOWER      | -----                                                          |       |  |       | 1116  |
| SIMLO10_FRUIT       | -----                                                          |       |  |       | 1116  |
|                     |                                                                | 4,620 |  | 4,640 |       |
| gDNA_Solyc02g083720 | <b>CTCTTCTTTC AATCATATGC AGAATGCATT TGAGATGGCA ACATACATAT</b>  |       |  |       | 4650  |
| cDNA_Solyc02g083720 | ----- <b>AA TGCATT TGAGATGGCA ACATACATAT</b>                   |       |  |       | 1313  |
| SIMLO10_LEAF        | ----- <b>AA TGCATT TGAGATGGCA ACATACATAT</b>                   |       |  |       | 1144  |
| SIMLO10_ROOTS       | ----- <b>AA TGCATT TGAGATGGCA ACATACATAT</b>                   |       |  |       | 1144  |
| SIMLO10_FLOWER      | ----- <b>AA TGCATT TGAGATGGCA ACATACATAT</b>                   |       |  |       | 1144  |
| SIMLO10_FRUIT       | ----- <b>AA TGCATT TGAGATGGCA ACATACATAT</b>                   |       |  |       | 1144  |
|                     |                                                                | 4,660 |  | 4,680 | 4,700 |
| gDNA_Solyc02g083720 | <b>GGTCACTGGT AAGAACTTGA GAAACTAGTG TTCTGATAGA AGTTTTGCTT</b>  |       |  |       | 4700  |
| cDNA_Solyc02g083720 | <b>GGTCACTG</b> --                                             |       |  |       | 1321  |
| SIMLO10_LEAF        | <b>GGTCACTG</b> --                                             |       |  |       | 1152  |
| SIMLO10_ROOTS       | <b>GGTCACTG</b> --                                             |       |  |       | 1152  |
| SIMLO10_FLOWER      | <b>GGTCACTG</b> --                                             |       |  |       | 1152  |
| SIMLO10_FRUIT       | <b>GGTCACTG</b> --                                             |       |  |       | 1152  |
|                     |                                                                | 4,720 |  | 4,740 |       |
| gDNA_Solyc02g083720 | <b>TACTGTAAT TAATCTTCA CCCAATACAT CCCTTCTGTT AGTCGGTAGA</b>    |       |  |       | 4750  |
| cDNA_Solyc02g083720 | -----                                                          |       |  |       | 1321  |
| SIMLO10_LEAF        | -----                                                          |       |  |       | 1152  |
| SIMLO10_ROOTS       | -----                                                          |       |  |       | 1152  |
| SIMLO10_FLOWER      | -----                                                          |       |  |       | 1152  |
| SIMLO10_FRUIT       | -----                                                          |       |  |       | 1152  |
|                     |                                                                | 4,760 |  | 4,780 | 4,800 |
| gDNA_Solyc02g083720 | <b>TGCAAGTTTC AAACATTGAT TATTACATA CTCTCCATT TCTCTGCACC</b>    |       |  |       | 4800  |
| cDNA_Solyc02g083720 | -----                                                          |       |  |       | 1321  |
| SIMLO10_LEAF        | -----                                                          |       |  |       | 1152  |
| SIMLO10_ROOTS       | -----                                                          |       |  |       | 1152  |
| SIMLO10_FLOWER      | -----                                                          |       |  |       | 1152  |
| SIMLO10_FRUIT       | -----                                                          |       |  |       | 1152  |

|                     |                   |                   |                    |                   |                   |      |
|---------------------|-------------------|-------------------|--------------------|-------------------|-------------------|------|
|                     |                   | 4,820             |                    | 4,840             |                   |      |
| gDNA_Solyc02g083720 | <b>CTTTTGTGAT</b> | <b>CAAAGCAAGG</b> | <b>GACATAGATT</b>  | <b>CTTCTGCCTA</b> | <b>GTGTTTTTCT</b> | 4850 |
| cDNA_Solyc02g083720 | -----             | -----             | -----              | -----             | -----             | 1321 |
| SIMLO10_LEAF        | -----             | -----             | -----              | -----             | -----             | 1152 |
| SIMLO10_ROOTS       | -----             | -----             | -----              | -----             | -----             | 1152 |
| SIMLO10_FLOWER      | -----             | -----             | -----              | -----             | -----             | 1152 |
| SIMLO10_FRUIT       | -----             | -----             | -----              | -----             | -----             | 1152 |
|                     | 4,860             |                   | 4,880              |                   | 4,900             |      |
| gDNA_Solyc02g083720 | <b>CGTTTGACGC</b> | <b>TCTTGATTAT</b> | <b>TTTGCCTTTT</b>  | <b>TGGGAGCCTC</b> | <b>TACAATATAA</b> | 4900 |
| cDNA_Solyc02g083720 | -----             | -----             | -----              | -----             | -----             | 1321 |
| SIMLO10_LEAF        | -----             | -----             | -----              | -----             | -----             | 1152 |
| SIMLO10_ROOTS       | -----             | -----             | -----              | -----             | -----             | 1152 |
| SIMLO10_FLOWER      | -----             | -----             | -----              | -----             | -----             | 1152 |
| SIMLO10_FRUIT       | -----             | -----             | -----              | -----             | -----             | 1152 |
|                     |                   | 4,920             |                    | 4,940             |                   |      |
| gDNA_Solyc02g083720 | <b>CTTGACCAA</b>  | <b>ATTTTCAACT</b> | <b>GGAGAAGCAA</b>  | <b>TTAGTTTTGG</b> | <b>TTGAAACAG</b>  | 4950 |
| cDNA_Solyc02g083720 | -----             | -----             | -----              | -----             | -----             | 1321 |
| SIMLO10_LEAF        | -----             | -----             | -----              | -----             | -----             | 1152 |
| SIMLO10_ROOTS       | -----             | -----             | -----              | -----             | -----             | 1152 |
| SIMLO10_FLOWER      | -----             | -----             | -----              | -----             | -----             | 1152 |
| SIMLO10_FRUIT       | -----             | -----             | -----              | -----             | -----             | 1152 |
|                     | 4,960             |                   | 4,980              |                   | 5,000             |      |
| gDNA_Solyc02g083720 | <b>AAATTGTACA</b> | <b>ACTTTAAAGA</b> | <b>ACATATATAT</b>  | <b>AACTTTTCAA</b> | <b>CTCTTATAAC</b> | 5000 |
| cDNA_Solyc02g083720 | -----             | -----             | -----              | -----             | -----             | 1321 |
| SIMLO10_LEAF        | -----             | -----             | -----              | -----             | -----             | 1152 |
| SIMLO10_ROOTS       | -----             | -----             | -----              | -----             | -----             | 1152 |
| SIMLO10_FLOWER      | -----             | -----             | -----              | -----             | -----             | 1152 |
| SIMLO10_FRUIT       | -----             | -----             | -----              | -----             | -----             | 1152 |
|                     |                   | 5,020             |                    | 5,040             |                   |      |
| gDNA_Solyc02g083720 | <b>AAACTGCAA</b>  | <b>GTACTATTGA</b> | <b>ACTATGGGCT</b>  | <b>AAACAACACA</b> | <b>GAGAGTTAAA</b> | 5050 |
| cDNA_Solyc02g083720 | -----             | -----             | -----              | -----             | -----             | 1321 |
| SIMLO10_LEAF        | -----             | -----             | -----              | -----             | -----             | 1152 |
| SIMLO10_ROOTS       | -----             | -----             | -----              | -----             | -----             | 1152 |
| SIMLO10_FLOWER      | -----             | -----             | -----              | -----             | -----             | 1152 |
| SIMLO10_FRUIT       | -----             | -----             | -----              | -----             | -----             | 1152 |
|                     | 5,060             |                   | 5,080              |                   | 5,100             |      |
| gDNA_Solyc02g083720 | <b>CAGACAATGT</b> | <b>TTTCATATGT</b> | <b>AGTTTGTGTC</b>  | <b>TGTTTTATGT</b> | <b>TTATACCTAA</b> | 5100 |
| cDNA_Solyc02g083720 | -----             | -----             | -----              | -----             | -----             | 1321 |
| SIMLO10_LEAF        | -----             | -----             | -----              | -----             | -----             | 1152 |
| SIMLO10_ROOTS       | -----             | -----             | -----              | -----             | -----             | 1152 |
| SIMLO10_FLOWER      | -----             | -----             | -----              | -----             | -----             | 1152 |
| SIMLO10_FRUIT       | -----             | -----             | -----              | -----             | -----             | 1152 |
|                     |                   | 5,120             |                    | 5,140             |                   |      |
| gDNA_Solyc02g083720 | <b>TCCTTAGGCG</b> | <b>AGGCAACACA</b> | <b>GACATTCGTG</b>  | <b>TCACTGCATG</b> | <b>AATACAAATT</b> | 5150 |
| cDNA_Solyc02g083720 | -----             | -----             | -----              | -----             | -----             | 1321 |
| SIMLO10_LEAF        | -----             | -----             | -----              | -----             | -----             | 1152 |
| SIMLO10_ROOTS       | -----             | -----             | -----              | -----             | -----             | 1152 |
| SIMLO10_FLOWER      | -----             | -----             | -----              | -----             | -----             | 1152 |
| SIMLO10_FRUIT       | -----             | -----             | -----              | -----             | -----             | 1152 |
|                     | 5,160             |                   | 5,180              |                   | 5,200             |      |
| gDNA_Solyc02g083720 | <b>TTTTCCATAT</b> | <b>GTACATGGGG</b> | <b>ATGACAAC TA</b> | <b>ATTTCCTTTT</b> | <b>CTTGGTGCAG</b> | 5200 |
| cDNA_Solyc02g083720 | -----             | -----             | -----              | -----             | -----             | 1321 |
| SIMLO10_LEAF        | -----             | -----             | -----              | -----             | -----             | 1152 |
| SIMLO10_ROOTS       | -----             | -----             | -----              | -----             | -----             | 1152 |
| SIMLO10_FLOWER      | -----             | -----             | -----              | -----             | -----             | 1152 |
| SIMLO10_FRUIT       | -----             | -----             | -----              | -----             | -----             | 1152 |
|                     |                   | 5,220             |                    | 5,240             |                   |      |
| gDNA_Solyc02g083720 | <b>TGGGAAATTA</b> | <b>AGGGATCTTC</b> | <b>ATGTTTCACA</b>  | <b>GACAATCACA</b> | <b>CATTTCTTGT</b> | 5250 |
| cDNA_Solyc02g083720 | <b>TGGGAAATTA</b> | <b>AGGGATCTTC</b> | <b>ATGTTTCACA</b>  | <b>GACAATCACA</b> | <b>CATTTCTTGT</b> | 1371 |
| SIMLO10_LEAF        | <b>TGGGAAATTA</b> | <b>AGGGATCTTC</b> | <b>ATGTTTCACA</b>  | <b>GACAATCACA</b> | <b>CATTTCTTGT</b> | 1202 |
| SIMLO10_ROOTS       | <b>TGGGAAATTA</b> | <b>AGGGATCTTC</b> | <b>ATGTTTCACA</b>  | <b>GACAATCACA</b> | <b>CATTTCTTGT</b> | 1202 |
| SIMLO10_FLOWER      | <b>TGGGAAATTA</b> | <b>AGGGATCTTC</b> | <b>ATGTTTCACA</b>  | <b>GACAATCACA</b> | <b>CATTTCTTGT</b> | 1202 |
| SIMLO10_FRUIT       | <b>TGGGAAATTA</b> | <b>AGGGATCTTC</b> | <b>ATGTTTCACA</b>  | <b>GACAATCACA</b> | <b>CATTTCTTGT</b> | 1202 |
|                     | 5,260             |                   | 5,280              |                   | 5,300             |      |
| gDNA_Solyc02g083720 | <b>GATTCGCTTG</b> | <b>TCATTTGGGT</b> | <b>AAC TATCTTG</b> | <b>TGTCTCACTT</b> | <b>CCTTGTTAAC</b> | 5300 |
| cDNA_Solyc02g083720 | <b>GATTCGCTTG</b> | <b>TCATTTGGG-</b> | -----              | -----             | -----             | 1390 |
| SIMLO10_LEAF        | <b>GATTCGCTTG</b> | <b>TCATTTGGG-</b> | -----              | -----             | -----             | 1221 |
| SIMLO10_ROOTS       | <b>GATTCGCTTG</b> | <b>TCATTTGGG-</b> | -----              | -----             | -----             | 1221 |
| SIMLO10_FLOWER      | <b>GATTCGCTTG</b> | <b>TCATTTGGG-</b> | -----              | -----             | -----             | 1221 |
| SIMLO10_FRUIT       | <b>GATTCGCTTG</b> | <b>TCATTTGGG-</b> | -----              | -----             | -----             | 1221 |
|                     |                   | 5,320             |                    | 5,340             |                   |      |
| gDNA_Solyc02g083720 | <b>TTGTTTCTGA</b> | <b>ATACACTGAT</b> | <b>TTTCGCATGA</b>  | <b>TCCTTGTGAC</b> | <b>TTGTTGCTGC</b> | 5350 |
| cDNA_Solyc02g083720 | -----             | -----             | -----              | -----             | -----             | 1390 |
| SIMLO10_LEAF        | -----             | -----             | -----              | -----             | -----             | 1221 |
| SIMLO10_ROOTS       | -----             | -----             | -----              | -----             | -----             | 1221 |
| SIMLO10_FLOWER      | -----             | -----             | -----              | -----             | -----             | 1221 |
| SIMLO10_FRUIT       | -----             | -----             | -----              | -----             | -----             | 1221 |
|                     | 5,360             |                   | 5,380              |                   | 5,400             |      |
| gDNA_Solyc02g083720 | <b>AGGGTTGTTT</b> | <b>CTCAATTCTG</b> | <b>GTGTAGCTTT</b>  | <b>GTCACATTTT</b> | <b>CGCTCTATGT</b> | 5400 |
| cDNA_Solyc02g083720 | <b>---GTTGTTT</b> | <b>CTCAATTCTG</b> | <b>GTGTAGCTTT</b>  | <b>GTCACATTTT</b> | <b>CGCTCTATGT</b> | 1437 |
| SIMLO10_LEAF        | <b>---GTTGTTT</b> | <b>CTCAATTCTG</b> | <b>GTGTAGCTTT</b>  | <b>GTCACATTTT</b> | <b>CGCTCTATGT</b> | 1268 |
| SIMLO10_ROOTS       | <b>---GTTGTTT</b> | <b>CTCAATTCTG</b> | <b>GTGTAGCTTT</b>  | <b>GTCACATTTT</b> | <b>CGCTCTATGT</b> | 1268 |
| SIMLO10_FLOWER      | <b>---GTTGTTT</b> | <b>CTCAATTCTG</b> | <b>GTGTAGCTTT</b>  | <b>GTCACATTTT</b> | <b>CGCTCTATGT</b> | 1268 |
| SIMLO10_FRUIT       | <b>---GTTGTTT</b> | <b>CTCAATTCTG</b> | <b>GTGTAGCTTT</b>  | <b>GTCACATTTT</b> | <b>CGCTCTATGT</b> | 1268 |

|                     |                    |                   |                    |                     |                    |      |
|---------------------|--------------------|-------------------|--------------------|---------------------|--------------------|------|
|                     |                    |                   | 5,420              |                     | 5,440              |      |
| gDNA_Solyc02g083720 | <b>TATTGTTGCT</b>  | <b>CAGGTAACTA</b> | <b>ACAAACACAA</b>  | <b>TGTAATCTCT</b>   | <b>TTTTTTTGTG</b>  | 5450 |
| cDNA_Solyc02g083720 | <b>TATTGTTGCT</b>  | <b>CAG</b>        | -----              | -----               | -----              | 1450 |
| SIMLO10_LEAF        | <b>TATTGTTGCT</b>  | <b>CAG</b>        | -----              | -----               | -----              | 1281 |
| SIMLO10_ROOTS       | <b>TATTGTTGCT</b>  | <b>CAG</b>        | -----              | -----               | -----              | 1281 |
| SIMLO10_FLOWER      | <b>TATTGTTGCT</b>  | <b>CAG</b>        | -----              | -----               | -----              | 1281 |
| SIMLO10_FRUIT       | <b>TATTGTTGCT</b>  | <b>CAG</b>        | -----              | -----               | -----              | 1281 |
|                     | 5,460              |                   | 5,480              |                     | 5,500              |      |
| gDNA_Solyc02g083720 | <b>CTTAGTAATC</b>  | <b>ATTCTACACA</b> | <b>TTTTATGTCA</b>  | <b>AGTCAGTGAT</b>   | <b>CCATGTTTGA</b>  | 5500 |
| cDNA_Solyc02g083720 | -----              | -----             | -----              | -----               | -----              | 1450 |
| SIMLO10_LEAF        | -----              | -----             | -----              | -----               | -----              | 1281 |
| SIMLO10_ROOTS       | -----              | -----             | -----              | -----               | -----              | 1281 |
| SIMLO10_FLOWER      | -----              | -----             | -----              | -----               | -----              | 1281 |
| SIMLO10_FRUIT       | -----              | -----             | -----              | -----               | -----              | 1281 |
|                     |                    | 5,520             |                    | 5,540               |                    |      |
| gDNA_Solyc02g083720 | <b>GCAGATGGGT</b>  | <b>TCGAGATACA</b> | <b>AGAAGACCAT</b>  | <b>TGTTTCAGAG</b>   | <b>AATGTTAGGA</b>  | 5550 |
| cDNA_Solyc02g083720 | -----ATGGGT        | <b>TCGAGATACA</b> | <b>AGAAGACCAT</b>  | <b>TGTTTCAGAG</b>   | <b>AATGTTAGGA</b>  | 1496 |
| SIMLO10_LEAF        | -----ATGGGT        | <b>TCGAGATACA</b> | <b>AGAAGACCAT</b>  | <b>TGTTTCAGAG</b>   | <b>AATGTTAGGA</b>  | 1327 |
| SIMLO10_ROOTS       | -----ATGGGT        | <b>TCGAGATACA</b> | <b>AGAAGACCAT</b>  | <b>TGTTTCAGAG</b>   | <b>AATGTTAGGA</b>  | 1327 |
| SIMLO10_FLOWER      | -----ATGGGT        | <b>TCGAGATACA</b> | <b>AGAAGACCAT</b>  | <b>TGTTTCAGAG</b>   | <b>AATGTTAGGA</b>  | 1327 |
| SIMLO10_FRUIT       | -----ATGGGT        | <b>TCGAGATACA</b> | <b>AGAAGACCAT</b>  | <b>TGTTTCAGAG</b>   | <b>AATGTTAGGA</b>  | 1327 |
|                     | 5,560              |                   | 5,580              |                     | 5,600              |      |
| gDNA_Solyc02g083720 | <b>CTTCGCTACA</b>  | <b>TGGATGGCGA</b> | <b>CACAAGGTGA</b>  | <b>AAACTAGACT</b>   | <b>AGAAGGTTCT</b>  | 5600 |
| cDNA_Solyc02g083720 | <b>CTTCGCTACA</b>  | <b>TGGATGGCGA</b> | <b>CACAAGGTGA</b>  | <b>AAACTAGACT</b>   | <b>AGAAGGTTCT</b>  | 1546 |
| SIMLO10_LEAF        | <b>CTTCGCTACA</b>  | <b>TGGATGGCGA</b> | <b>CACAAGGTGA</b>  | <b>AAACTAGACT</b>   | <b>AGAAGGTTCT</b>  | 1377 |
| SIMLO10_ROOTS       | <b>CTTCGCTACA</b>  | <b>TGGATGGCGA</b> | <b>CACAAGGTGA</b>  | <b>AAACTAGACT</b>   | <b>AGAAGGTTCT</b>  | 1377 |
| SIMLO10_FLOWER      | <b>CTTCGCTACA</b>  | <b>TGGATGGCGA</b> | <b>CACAAGGTGA</b>  | <b>AAACTAGACT</b>   | <b>AGAAGGTTCT</b>  | 1377 |
| SIMLO10_FRUIT       | <b>CTTCGCTACA</b>  | <b>TGGATGGCGA</b> | <b>CACAAGGTGA</b>  | <b>AAACTAGACT</b>   | <b>AGAAGGTTCT</b>  | 1377 |
|                     |                    | 5,620             |                    | 5,640               |                    |      |
| gDNA_Solyc02g083720 | <b>GTGCTTTTCTC</b> | <b>CAGAAACATT</b> | <b>ATTAGCAACC</b>  | <b>ACATCATTAG</b>   | <b>ACTCCATGGC</b>  | 5650 |
| cDNA_Solyc02g083720 | <b>GTGCTTTTCTC</b> | <b>CAGAAACATT</b> | <b>ATTAGCAACC</b>  | <b>ACATCATTAG</b>   | <b>ACTCCATGGC</b>  | 1596 |
| SIMLO10_LEAF        | <b>GTGCTTTTCTC</b> | <b>CAGAAACATT</b> | <b>ATTAGCAACC</b>  | <b>ACATCATTAG</b>   | <b>ACTCCATGGC</b>  | 1427 |
| SIMLO10_ROOTS       | <b>GTGCTTTTCTC</b> | <b>CAGAAACATT</b> | <b>ATTAGCAACC</b>  | <b>ACATCATTAG</b>   | <b>ACTCCATGGC</b>  | 1427 |
| SIMLO10_FLOWER      | <b>GTGCTTTTCTC</b> | <b>CAGAAACATT</b> | <b>ATTAGCAACC</b>  | <b>ACATCATTAG</b>   | <b>ACTCCATGGC</b>  | 1427 |
| SIMLO10_FRUIT       | <b>GTGCTTTTCTC</b> | <b>CAGAAACATT</b> | <b>ATTAGCAACC</b>  | <b>ACATCATTAG</b>   | <b>ACTCCATGGC</b>  | 1427 |
|                     | 5,660              |                   | 5,680              |                     | 5,700              |      |
| gDNA_Solyc02g083720 | <b>GGAGGATGAG</b>  | <b>GTAGATCAAA</b> | <b>TTCA TAGCGT</b> | <b>TGCTACTATC</b>   | <b>AGCACAGAGG</b>  | 5700 |
| cDNA_Solyc02g083720 | <b>GGAGGATGAG</b>  | <b>GTAGATCAAA</b> | <b>TTCA TAGCGT</b> | <b>TGCTACTATC</b>   | <b>AGCACAGAGG</b>  | 1646 |
| SIMLO10_LEAF        | <b>GGAGGATGAG</b>  | <b>GTAGATCAAA</b> | <b>TTCA TAGCGT</b> | <b>TGCTACTATC</b>   | <b>AGCACAGAGG</b>  | 1477 |
| SIMLO10_ROOTS       | <b>GGAGGATGAG</b>  | <b>GTAGATCAAA</b> | <b>TTCA TAGCGT</b> | <b>TGCTACTATC</b>   | <b>AGCACAGAGG</b>  | 1477 |
| SIMLO10_FLOWER      | <b>GGAGGATGAG</b>  | <b>GTAGATCAAA</b> | <b>TTCA TAGCGT</b> | <b>TGCTACTATC</b>   | <b>AGCACAGAGG</b>  | 1477 |
| SIMLO10_FRUIT       | <b>GGAGGATGAG</b>  | <b>GTAGATCAAA</b> | <b>TTCA TAGCGT</b> | <b>TGCTACTATC</b>   | <b>AGCACAGAGG</b>  | 1477 |
|                     |                    | 5,720             |                    | 5,740               |                    |      |
| gDNA_Solyc02g083720 | <b>TGTTTGATGA</b>  | <b>GAGTACAGTT</b> | <b>GAGTCGGAAC</b>  | <b>AACGAGTCCC</b>   | <b>TATTGAGCAA</b>  | 5750 |
| cDNA_Solyc02g083720 | <b>TGTTTGATGA</b>  | <b>GAGTACAGTT</b> | <b>GAGTCGGAAC</b>  | <b>AACGAGTCCC</b>   | <b>TATTGAGCAA</b>  | 1696 |
| SIMLO10_LEAF        | <b>TGTTTGATGA</b>  | <b>GAGTACAGTT</b> | <b>GAGTCGGAAC</b>  | <b>AACGAGTCCC</b>   | <b>TATTGAGCAA</b>  | 1527 |
| SIMLO10_ROOTS       | <b>TGTTTGATGA</b>  | <b>GAGTACAGTT</b> | <b>GAGTCGGAAC</b>  | <b>AACGAGTCCC</b>   | <b>TATTGAGCAA</b>  | 1527 |
| SIMLO10_FLOWER      | <b>TGTTTGATGA</b>  | <b>GAGTACAGTT</b> | <b>GAGTCGGAAC</b>  | <b>AACGAGTCCC</b>   | <b>TATTGAGCAA</b>  | 1527 |
| SIMLO10_FRUIT       | <b>TGTTTGATGA</b>  | <b>GAGTACAGTT</b> | <b>GAGTCGGAAC</b>  | <b>AACGAGTCCC</b>   | <b>TATTGAGCAA</b>  | 1527 |
|                     | 5,760              |                   | 5,780              |                     | 5,800              |      |
| gDNA_Solyc02g083720 | <b>AGTTGTACCA</b>  | <b>ATGAGATCTC</b> | <b>AGAA TGTGAT</b> | <b>GAGTTACATA</b>   | <b>TTCCAC TTTC</b> | 5800 |
| cDNA_Solyc02g083720 | <b>AGTTGTACCA</b>  | <b>ATGAGATCTC</b> | <b>AGAA TGTGAT</b> | <b>GAGTTACATA</b>   | <b>TTCCAC TTTC</b> | 1746 |
| SIMLO10_LEAF        | <b>AGTTGTACCA</b>  | <b>ATGAGATCTC</b> | <b>AGAA TGTGAT</b> | <b>GAGTTACATA</b>   | <b>TTCCAC TTTC</b> | 1577 |
| SIMLO10_ROOTS       | <b>AGTTGTACCA</b>  | <b>ATGAGATCTC</b> | <b>AGAA TGTGAT</b> | <b>GAGTTACATA</b>   | <b>TTCCAC TTTC</b> | 1577 |
| SIMLO10_FLOWER      | <b>AGTTGTACCA</b>  | <b>ATGAGATCTC</b> | <b>AGAA TGTGAT</b> | <b>GAGTTACATA</b>   | <b>TTCCAC TTTC</b> | 1577 |
| SIMLO10_FRUIT       | <b>AGTTGTACCA</b>  | <b>ATGAGATCTC</b> | <b>AGAA TGTGAT</b> | <b>GAGTTACATA</b>   | <b>TTCCAC TTTC</b> | 1577 |
|                     |                    | 5,820             |                    | 5,840               |                    |      |
| gDNA_Solyc02g083720 | <b>TCCTAGAAA</b>   | <b>CATGGAGAGG</b> | <b>TTTGA TCAAA</b> | <b>ACAA TGA TGA</b> | <b>GATGATATAG</b>  | 5850 |
| cDNA_Solyc02g083720 | <b>TCCTAGAAA</b>   | <b>CATGGAGAGG</b> | <b>TTTGA TCAAA</b> | <b>ACAA TGA TGA</b> | <b>GATGATATAG</b>  | 1796 |
| SIMLO10_LEAF        | <b>TCCTAGAAA</b>   | <b>CATGGAGAGG</b> | <b>TTTGA</b>       | -----               | -----              | 1602 |
| SIMLO10_ROOTS       | <b>TCCTAGAAA</b>   | <b>CATGGAGAGG</b> | <b>TTTGA</b>       | -----               | -----              | 1602 |
| SIMLO10_FLOWER      | <b>TCCTAGAAA</b>   | <b>CATGGAGAGG</b> | <b>TTTGA</b>       | -----               | -----              | 1602 |
| SIMLO10_FRUIT       | <b>TCCTAGAAA</b>   | <b>CATGGAGAGG</b> | <b>TTTGA</b>       | -----               | -----              | 1602 |
|                     | 5,860              |                   | 5,880              |                     | 5,900              |      |
| gDNA_Solyc02g083720 | <b>TTTCGCTCCT</b>  | <b>TATATTACAG</b> | <b>AATCCACAAC</b>  | <b>CTTAGACATA</b>   | <b>CTAATCAACT</b>  | 5900 |
| cDNA_Solyc02g083720 | <b>TTTCGCTCCT</b>  | <b>TATATTACAG</b> | <b>AATCCACAAC</b>  | <b>CTTAGACATA</b>   | <b>CTAATCAACT</b>  | 1846 |
| SIMLO10_LEAF        | -----              | -----             | -----              | -----               | -----              | 1602 |
| SIMLO10_ROOTS       | -----              | -----             | -----              | -----               | -----              | 1602 |
| SIMLO10_FLOWER      | -----              | -----             | -----              | -----               | -----              | 1602 |
| SIMLO10_FRUIT       | -----              | -----             | -----              | -----               | -----              | 1602 |
|                     |                    | 5,920             |                    | 5,940               |                    |      |
| gDNA_Solyc02g083720 | <b>TGTTTCATCTT</b> | <b>GCTTTTGTCC</b> | <b>AAATTTTCCA</b>  | <b>GGCTATATAG</b>   | 5940               |      |
| cDNA_Solyc02g083720 | <b>TGTTTCATCTT</b> | <b>GCTTTTGTCC</b> | <b>AAATTTTCCA</b>  | <b>GGCTATATAG</b>   | 1886               |      |
| SIMLO10_LEAF        | -----              | -----             | -----              | -----               | 1602               |      |
| SIMLO10_ROOTS       | -----              | -----             | -----              | -----               | 1602               |      |
| SIMLO10_FLOWER      | -----              | -----             | -----              | -----               | 1602               |      |
| SIMLO10_FRUIT       | -----              | -----             | -----              | -----               | 1602               |      |

|                     |                    |                    |                     |                      |                        |
|---------------------|--------------------|--------------------|---------------------|----------------------|------------------------|
|                     |                    | 20                 |                     | 40                   |                        |
| gDNA_Solyc01g102520 | <b>TCATCAAGAC</b>  | <b>ATGCATTAAG</b>  | <b>GTTAAATATG</b>   | <b>GCGGAAAAGT</b>    | <b>CTGAGTCGTC</b> 50   |
| cDNA_Solyc01g102520 | <b>TCATCAAGAC</b>  | <b>ATGCATTAAG</b>  | <b>GTTAAATATG</b>   | <b>GCGGAAAAGT</b>    | <b>CTGAGTCGTC</b> 50   |
| SIMLO11_LEAF        | -----              | -----              | -----ATG            | <b>GCGGAAAAGT</b>    | <b>CTGAGTCGTC</b> 23   |
| SIMLO11_ROOT        | -----              | -----              | -----ATG            | <b>GCGGAAAAGT</b>    | <b>CTGAGTCGTC</b> 23   |
| SIMLO11_FLOWER      | -----              | -----              | -----ATG            | <b>GCGGAAAAGT</b>    | <b>CTGAGTCGTC</b> 23   |
| SIMLO11_FRUIT       | -----              | -----              | -----ATG            | <b>GCGGAAAAGT</b>    | <b>CTGAGTCGTC</b> 23   |
|                     | 60                 |                    | 80                  |                      | 100                    |
| gDNA_Solyc01g102520 | <b>TCTGGAGTAT</b>  | <b>ACACCAACAT</b>  | <b>GGGTCGTTGC</b>   | <b>CGTTGTCTGT</b>    | <b>TTCATCATTG</b> 100  |
| cDNA_Solyc01g102520 | <b>TCTGGAGTAT</b>  | <b>ACACCAACAT</b>  | <b>GGGTCGTTGC</b>   | <b>CGTTGTCTGT</b>    | <b>TTCATCATTG</b> 100  |
| SIMLO11_LEAF        | <b>TCTGGAGTAT</b>  | <b>ACACCAACAT</b>  | <b>GGGTCGTTGC</b>   | <b>CGTTGTCTGT</b>    | <b>TTCATCATTG</b> 73   |
| SIMLO11_ROOT        | <b>TCTGGAGTAT</b>  | <b>ACACCAACAT</b>  | <b>GGGTCGTTGC</b>   | <b>CGTTGTCTGT</b>    | <b>TTCATCATTG</b> 73   |
| SIMLO11_FLOWER      | <b>TCTGGAGTAT</b>  | <b>ACACCAACAT</b>  | <b>GGGTCGTTGC</b>   | <b>CGTTGTCTGT</b>    | <b>TTCATCATTG</b> 73   |
| SIMLO11_FRUIT       | <b>TCTGGAGTAT</b>  | <b>ACACCAACAT</b>  | <b>GGGTCGTTGC</b>   | <b>CGTTGTCTGT</b>    | <b>TTCATCATTG</b> 73   |
|                     | 120                |                    | 140                 |                      |                        |
| gDNA_Solyc01g102520 | <b>TTCTCATTTT</b>  | <b>ACTTGCTGCT</b>  | <b>GAACGTGGCC</b>   | <b>TTCATCGCCT</b>    | <b>TGGAAAGGTT</b> 150  |
| cDNA_Solyc01g102520 | <b>TTCTCATTTT</b>  | <b>ACTTGCTGCT</b>  | <b>GAACGTGGCC</b>   | <b>TTCATCGCCT</b>    | <b>TGGAAAG</b> --- 147 |
| SIMLO11_LEAF        | <b>TTCTCATTTT</b>  | <b>ACTTGCTGCT</b>  | <b>GAACGTGGCC</b>   | <b>TTCATCGCCT</b>    | <b>TGGAAAG</b> --- 120 |
| SIMLO11_ROOT        | <b>TTCTCATTTT</b>  | <b>ACTTGCTGCT</b>  | <b>GAACGTGGCC</b>   | <b>TTCATCGCCT</b>    | <b>TGGAAAG</b> --- 120 |
| SIMLO11_FLOWER      | <b>TTCTCATTTT</b>  | <b>ACTTGCTGCT</b>  | <b>GAACGTGGCC</b>   | <b>TTCATCGCCT</b>    | <b>TGGAAAG</b> --- 120 |
| SIMLO11_FRUIT       | <b>TTCTCATTTT</b>  | <b>ACTTGCTGCT</b>  | <b>GAACGTGGCC</b>   | <b>TTCATCGCCT</b>    | <b>TGGAAAG</b> --- 120 |
|                     | 160                |                    | 180                 |                      | 200                    |
| gDNA_Solyc01g102520 | <b>GGTCTCTACT</b>  | <b>AGTAAAGTGA</b>  | <b>TGGTACGTTA</b>   | <b>CTCTATATAC</b>    | <b>GTTCAATAGT</b> 200  |
| cDNA_Solyc01g102520 | -----              | -----              | -----               | -----                | -----                  |
| SIMLO11_LEAF        | -----              | -----              | -----               | -----                | -----                  |
| SIMLO11_ROOT        | -----              | -----              | -----               | -----                | -----                  |
| SIMLO11_FLOWER      | -----              | -----              | -----               | -----                | -----                  |
| SIMLO11_FRUIT       | -----              | -----              | -----               | -----                | -----                  |
|                     | 220                |                    | 240                 |                      |                        |
| gDNA_Solyc01g102520 | <b>TGATCGATGA</b>  | <b>TGTTGTTG TG</b> | <b>TTACAGTTCT</b>   | <b>TCTTGCAAAA</b>    | <b>GAATCAAGAT</b> 250  |
| cDNA_Solyc01g102520 | -----              | -----              | -----TTCT           | <b>TCTTGCAAAA</b>    | <b>GAATCAAGAT</b> 171  |
| SIMLO11_LEAF        | -----              | -----              | -----TTCT           | <b>TCTTGCAAAA</b>    | <b>GAATCAAGAT</b> 144  |
| SIMLO11_ROOT        | -----              | -----              | -----TTCT           | <b>TCTTGCAAAA</b>    | <b>GAATCAAGAT</b> 144  |
| SIMLO11_FLOWER      | -----              | -----              | -----TTCT           | <b>TCTTGCAAAA</b>    | <b>GAATCAAGAT</b> 144  |
| SIMLO11_FRUIT       | -----              | -----              | -----TTCT           | <b>TCTTGCAAAA</b>    | <b>GAATCAAGAT</b> 144  |
|                     | 260                |                    | 280                 |                      | 300                    |
| gDNA_Solyc01g102520 | <b>GCCCATTCCA</b>  | <b>AGGCAC TCCA</b> | <b>GAAA T TAAAA</b> | <b>GAAGG T T TGA</b> | <b>CGACACA TGG</b> 300 |
| cDNA_Solyc01g102520 | <b>GCCCATTCCA</b>  | <b>AGGCAC TCCA</b> | <b>GAAA T TAAAA</b> | <b>GAAG</b> -----    | -----                  |
| SIMLO11_LEAF        | <b>GCCCATTCCA</b>  | <b>AGGCAC TCCA</b> | <b>GAAA T TAAAA</b> | <b>GAAG</b> -----    | -----                  |
| SIMLO11_ROOT        | <b>GCCCATTCCA</b>  | <b>AGGCAC TCCA</b> | <b>GAAA T TAAAA</b> | <b>GAAGG T T TGA</b> | <b>CGACACA TGG</b> 194 |
| SIMLO11_FLOWER      | <b>GCCCATTCCA</b>  | <b>AGGCAC TCCA</b> | <b>GAAA T TAAAA</b> | <b>GAAG</b> -----    | -----                  |
| SIMLO11_FRUIT       | <b>GCCCATTCCA</b>  | <b>AGGCAC TCCA</b> | <b>GAAA T TAAAA</b> | <b>GAAG</b> -----    | -----                  |
|                     | 320                |                    | 340                 |                      |                        |
| gDNA_Solyc01g102520 | <b>ATTGATTCTG</b>  | <b>TATTTGTAGT</b>  | <b>TACATTATTT</b>   | <b>TTTTTTTGGT</b>    | <b>TAATAAATTG</b> 350  |
| cDNA_Solyc01g102520 | -----              | -----              | -----               | -----                | -----                  |
| SIMLO11_LEAF        | -----              | -----              | -----               | -----                | -----                  |
| SIMLO11_ROOT        | <b>ATTGATTCTG</b>  | <b>TATTTGTAGT</b>  | <b>TACATTATTT</b>   | <b>TTTTTT -GGT</b>   | <b>TAATAAATTG</b> 243  |
| SIMLO11_FLOWER      | -----              | -----              | -----               | -----                | -----                  |
| SIMLO11_FRUIT       | -----              | -----              | -----               | -----                | -----                  |
|                     | 360                |                    | 380                 |                      | 400                    |
| gDNA_Solyc01g102520 | <b>AATTTGCAGA</b>  | <b>ATTGATGCTT</b>  | <b>TTGGGATTTA</b>   | <b>TTTCTCTGCT</b>    | <b>ATTGACGGTG</b> 400  |
| cDNA_Solyc01g102520 | -----A             | <b>ATTGATGCTT</b>  | <b>TTGGGATTTA</b>   | <b>TTTCTCTGCT</b>    | <b>ATTGACGGTG</b> 246  |
| SIMLO11_LEAF        | -----A             | <b>ATTGATGCTT</b>  | <b>TTGGGATTTA</b>   | <b>TTTCTCTGCT</b>    | <b>ATTGACGGTG</b> 219  |
| SIMLO11_ROOT        | <b>AATTTGCAGA</b>  | <b>ATTGATGCTT</b>  | <b>TTGGGATTTA</b>   | <b>TTTCTCTGCT</b>    | <b>ATTGACGGTG</b> 293  |
| SIMLO11_FLOWER      | -----A             | <b>ATTGATGCTT</b>  | <b>TTGGGATTTA</b>   | <b>TTTCTCTGCT</b>    | <b>ATTGACGGTG</b> 219  |
| SIMLO11_FRUIT       | -----A             | <b>ATTGATGCTT</b>  | <b>TTGGGATTTA</b>   | <b>TTTCTCTGCT</b>    | <b>ATTGACGGTG</b> 219  |
|                     | 420                |                    | 440                 |                      |                        |
| gDNA_Solyc01g102520 | <b>TCTCAAGGGG</b>  | <b>CAATAAGCCA</b>  | <b>AATATGTGTT</b>   | <b>CCTGAAAATA</b>    | <b>TTTCAAAAAGT</b> 450 |
| cDNA_Solyc01g102520 | <b>TCTCAAGGGG</b>  | <b>CAATAAGCCA</b>  | <b>AATATGTGTT</b>   | <b>CCTGAAAATA</b>    | <b>TTTCAAAAAGT</b> 296 |
| SIMLO11_LEAF        | <b>TCTCAAGGGG</b>  | <b>CAATAAGCCA</b>  | <b>AATATGTGTT</b>   | <b>CCTGAAAATA</b>    | <b>TTTCAAAAAGT</b> 269 |
| SIMLO11_ROOT        | <b>TCTCAAGGGG</b>  | <b>CAATAAGCCA</b>  | <b>AATATGTGTT</b>   | <b>CCTGAAAATA</b>    | <b>TTTCAAAAAGT</b> 343 |
| SIMLO11_FLOWER      | <b>TCTCAAGGGG</b>  | <b>CAATAAGCCA</b>  | <b>AATATGTGTT</b>   | <b>CCTGAAAATA</b>    | <b>TTTCAAAAAGT</b> 269 |
| SIMLO11_FRUIT       | <b>TCTCAAGGGG</b>  | <b>CAATAAGCCA</b>  | <b>AATATGTGTT</b>   | <b>CCTGAAAATA</b>    | <b>TTTCAAAAAGT</b> 269 |
|                     | 460                |                    | 480                 |                      | 500                    |
| gDNA_Solyc01g102520 | <b>AATGCTTCCA</b>  | <b>TGCAAGCTTA</b>  | <b>AAGAAGCTTC</b>   | <b>AAC TTCTAAA</b>   | <b>CATCTCATCA</b> 500  |
| cDNA_Solyc01g102520 | <b>AATGCTTCCA</b>  | <b>TGCAAGCTTA</b>  | <b>AAGAAGCTTC</b>   | <b>AAC TTCTAAA</b>   | <b>CATCTCATCA</b> 346  |
| SIMLO11_LEAF        | <b>AATGCTTCCA</b>  | <b>TGCAAGCTTA</b>  | <b>AAGAAGCTTC</b>   | <b>AAC TTCTAAA</b>   | <b>CATCTCATCA</b> 319  |
| SIMLO11_ROOT        | <b>AATGCTTCCA</b>  | <b>TGCAAGCTTA</b>  | <b>AAGAAGCTTC</b>   | <b>AAC TTCTAAA</b>   | <b>CATCTCATCA</b> 393  |
| SIMLO11_FLOWER      | <b>AATGCTTCCA</b>  | <b>TGCAAGCTTA</b>  | <b>AAGAAGCTTC</b>   | <b>AAC TTCTAAA</b>   | <b>CATCTCATCA</b> 319  |
| SIMLO11_FRUIT       | <b>AATGCTTCCA</b>  | <b>TGCAAGCTTA</b>  | <b>AAGAAGCTTC</b>   | <b>AAC TTCTAAA</b>   | <b>CATCTCATCA</b> 319  |
|                     | 520                |                    | 540                 |                      |                        |
| gDNA_Solyc01g102520 | <b>CTGGGAGACA</b>  | <b>TCTTTTAGCT</b>  | <b>GGATCTAGCG</b>   | <b>GTGAACAACA</b>    | <b>TTGTAATCAT</b> 550  |
| cDNA_Solyc01g102520 | <b>CTGGGAGACA</b>  | <b>TCTTTTAGCT</b>  | <b>GGATCTAGCG</b>   | <b>GTGAACAACA</b>    | <b>TTGTAATCAT</b> 396  |
| SIMLO11_LEAF        | <b>CTGGGAGACA</b>  | <b>TCTTTTAGCT</b>  | <b>GGATCTAGCG</b>   | <b>GTGAACAACA</b>    | <b>TTGTAATCAT</b> 369  |
| SIMLO11_ROOT        | <b>CTGGGAGACA</b>  | <b>TCTTTTAGCT</b>  | <b>GGATCTAGCG</b>   | <b>GTGAACAACA</b>    | <b>TTGTAATCAT</b> 443  |
| SIMLO11_FLOWER      | <b>CTGGGAGACA</b>  | <b>TCTTTTAGCT</b>  | <b>GGATCTAGCG</b>   | <b>GTGAACAACA</b>    | <b>TTGTAATCAT</b> 369  |
| SIMLO11_FRUIT       | <b>CTGGGAGACA</b>  | <b>TCTTTTAGCT</b>  | <b>GGATCTAGCG</b>   | <b>GTGAACAACA</b>    | <b>TTGTAATCAT</b> 369  |
|                     | 560                |                    | 580                 |                      | 600                    |
| gDNA_Solyc01g102520 | <b>CACGAGG TGA</b> | <b>ATCATTATTT</b>  | <b>TCCTTTGTCT</b>   | <b>AATTACTGTT</b>    | <b>ATTTCAATTA</b> 600  |
| cDNA_Solyc01g102520 | <b>CACGAGG</b> --- | -----              | -----               | -----                | -----                  |
| SIMLO11_LEAF        | <b>CACGAGG</b> --- | -----              | -----               | -----                | -----                  |
| SIMLO11_ROOT        | <b>CACGAGG</b> --- | -----              | -----               | -----                | -----                  |
| SIMLO11_FLOWER      | <b>CACGAGG</b> --- | -----              | -----               | -----                | -----                  |
| SIMLO11_FRUIT       | <b>CACGAGG</b> --- | -----              | -----               | -----                | -----                  |

|                     |                    |                   |                    |                   |                    |      |
|---------------------|--------------------|-------------------|--------------------|-------------------|--------------------|------|
|                     |                    |                   | 620                |                   | 640                |      |
| gDNA_Solyc01g102520 | <b>TAAGATTTAA</b>  | <b>ATTTATTAAT</b> | <b>TTGTGTAGGG</b>  | <b>AAAAGTTCCA</b> | <b>CTGTTATCAC</b>  | 650  |
| cDNA_Solyc01g102520 | -----              | -----             | -----G             | <b>AAAAGTTCCA</b> | <b>CTGTTATCAC</b>  | 424  |
| SIMLO11_LEAF        | -----              | -----             | -----G             | <b>AAAAGTTCCA</b> | <b>CTGTTATCAC</b>  | 397  |
| SIMLO11_ROOT        | -----              | -----             | -----G             | <b>AAAAGTTCCA</b> | <b>CTGTTATCAC</b>  | 471  |
| SIMLO11_FLOWER      | -----              | -----             | -----G             | <b>AAAAGTTCCA</b> | <b>CTGTTATCAC</b>  | 397  |
| SIMLO11_FRUIT       | -----              | -----             | -----G             | <b>AAAAGTTCCA</b> | <b>CTGTTATCAC</b>  | 397  |
|                     | 660                |                   | 680                |                   | 700                |      |
| gDNA_Solyc01g102520 | <b>TGGAGGCATT</b>  | <b>GCATCAACTA</b> | <b>CACATTTTCA</b>  | <b>TATTTGTATT</b> | <b>GGCAGTCACA</b>  | 700  |
| cDNA_Solyc01g102520 | <b>TGGAGGCATT</b>  | <b>GCATCAACTA</b> | <b>CACATTTTCA</b>  | <b>TATTTGTATT</b> | <b>GGCAGTCACA</b>  | 474  |
| SIMLO11_LEAF        | <b>TGGAGGCATT</b>  | <b>GCATCAACTA</b> | <b>CACATTTTCA</b>  | <b>TATTTGTATT</b> | <b>GGCAGTCACA</b>  | 447  |
| SIMLO11_ROOT        | <b>TGGAGGCATT</b>  | <b>GCATCAACTA</b> | <b>CACATTTTCA</b>  | <b>TATTTGTATT</b> | <b>GGCAGTCACA</b>  | 521  |
| SIMLO11_FLOWER      | <b>TGGAGGCATT</b>  | <b>GCATCAACTA</b> | <b>CACATTTTCA</b>  | <b>TATTTGTATT</b> | <b>GGCAGTCACA</b>  | 447  |
| SIMLO11_FRUIT       | <b>TGGAGGCATT</b>  | <b>GCATCAACTA</b> | <b>CACATTTTCA</b>  | <b>TATTTGTATT</b> | <b>GGCAGTCACA</b>  | 447  |
|                     | 720                |                   | 740                |                   |                    |      |
| gDNA_Solyc01g102520 | <b>CATGTTATCT</b>  | <b>TCTGTGCCAC</b> | <b>CACCATGGTT</b>  | <b>CTTGGAGGGG</b> | <b>CTAAGGTA</b>    | 750  |
| cDNA_Solyc01g102520 | <b>CATGTTATCT</b>  | <b>TCTGTGCCAC</b> | <b>CACCATGGTT</b>  | <b>CTTGGAGGGG</b> | <b>CTAAG</b> ----- | 519  |
| SIMLO11_LEAF        | <b>CATGTTATCT</b>  | <b>TCTGTGCCAC</b> | <b>CACCATGGTT</b>  | <b>CTTGGAGGGG</b> | <b>CTAAG</b> ----- | 492  |
| SIMLO11_ROOT        | <b>CATGTTATCT</b>  | <b>TCTGTGCCAC</b> | <b>CACCATGGTT</b>  | <b>CTTGGAGGGG</b> | <b>CTAAG</b> ----- | 566  |
| SIMLO11_FLOWER      | <b>CATGTTATCT</b>  | <b>TCTGTGCCAC</b> | <b>CACCATGGTT</b>  | <b>CTTGGAGGGG</b> | <b>CTAAG</b> ----- | 492  |
| SIMLO11_FRUIT       | <b>CATGTTATCT</b>  | <b>TCTGTGCCAC</b> | <b>CACCATGGTT</b>  | <b>CTTGGAGGGG</b> | <b>CTAAG</b> ----- | 492  |
|                     | 760                |                   | 780                |                   | 800                |      |
| gDNA_Solyc01g102520 | <b>ATATTTAACA</b>  | <b>ATTAATTCAT</b> | <b>TTTCAATTC</b>   | <b>TTTCCCAATT</b> | <b>TGTAAATTAA</b>  | 800  |
| cDNA_Solyc01g102520 | -----              | -----             | -----              | -----             | -----              | 519  |
| SIMLO11_LEAF        | -----              | -----             | -----              | -----             | -----              | 492  |
| SIMLO11_ROOT        | -----              | -----             | -----              | -----             | -----              | 566  |
| SIMLO11_FLOWER      | -----              | -----             | -----              | -----             | -----              | 492  |
| SIMLO11_FRUIT       | -----              | -----             | -----              | -----             | -----              | 492  |
|                     | 820                |                   | 840                |                   |                    |      |
| gDNA_Solyc01g102520 | <b>AAAAAAACAT</b>  | <b>ATAAATATTA</b> | <b>CACATAAAAA</b>  | <b>ATACACGAGT</b> | <b>AAATATTATA</b>  | 850  |
| cDNA_Solyc01g102520 | -----              | -----             | -----              | -----             | -----              | 519  |
| SIMLO11_LEAF        | -----              | -----             | -----              | -----             | -----              | 492  |
| SIMLO11_ROOT        | -----              | -----             | -----              | -----             | -----              | 566  |
| SIMLO11_FLOWER      | -----              | -----             | -----              | -----             | -----              | 492  |
| SIMLO11_FRUIT       | -----              | -----             | -----              | -----             | -----              | 492  |
|                     | 860                |                   | 880                |                   | 900                |      |
| gDNA_Solyc01g102520 | <b>GTGTGTAGTG</b>  | <b>AGTAAGTGAA</b> | <b>GTGAAAGAGA</b>  | <b>GAGTTGAGAC</b> | <b>AAAGAAAACA</b>  | 900  |
| cDNA_Solyc01g102520 | -----              | -----             | -----              | -----             | -----              | 519  |
| SIMLO11_LEAF        | -----              | -----             | -----              | -----             | -----              | 492  |
| SIMLO11_ROOT        | -----              | -----             | -----              | -----             | -----              | 566  |
| SIMLO11_FLOWER      | -----              | -----             | -----              | -----             | -----              | 492  |
| SIMLO11_FRUIT       | -----              | -----             | -----              | -----             | -----              | 492  |
|                     | 920                |                   | 940                |                   |                    |      |
| gDNA_Solyc01g102520 | <b>CGCTATGCAT</b>  | <b>TTATTCGTTT</b> | <b>AGTATAAAGA</b>  | <b>GCCGATTTAC</b> | <b>GTAATAATTAT</b> | 950  |
| cDNA_Solyc01g102520 | -----              | -----             | -----              | -----             | -----              | 519  |
| SIMLO11_LEAF        | -----              | -----             | -----              | -----             | -----              | 492  |
| SIMLO11_ROOT        | -----              | -----             | -----              | -----             | -----              | 566  |
| SIMLO11_FLOWER      | -----              | -----             | -----              | -----             | -----              | 492  |
| SIMLO11_FRUIT       | -----              | -----             | -----              | -----             | -----              | 492  |
|                     | 960                |                   | 980                |                   | 1,000              |      |
| gDNA_Solyc01g102520 | <b>ATTCAAATAA</b>  | <b>CTAAGATAAA</b> | <b>ATACATCTAT</b>  | <b>TTGTTTTATT</b> | <b>CAACAAAAAA</b>  | 1000 |
| cDNA_Solyc01g102520 | -----              | -----             | -----              | -----             | -----              | 519  |
| SIMLO11_LEAF        | -----              | -----             | -----              | -----             | -----              | 492  |
| SIMLO11_ROOT        | -----              | -----             | -----              | -----             | -----              | 566  |
| SIMLO11_FLOWER      | -----              | -----             | -----              | -----             | -----              | 492  |
| SIMLO11_FRUIT       | -----              | -----             | -----              | -----             | -----              | 492  |
|                     | 1,020              |                   | 1,040              |                   |                    |      |
| gDNA_Solyc01g102520 | <b>AAGGGGGGGG</b>  | <b>CCATTACTTT</b> | <b>ACGTACTTTT</b>  | <b>CAAAAACACA</b> | <b>ACTCATAATT</b>  | 1050 |
| cDNA_Solyc01g102520 | -----              | -----             | -----              | -----             | -----              | 519  |
| SIMLO11_LEAF        | -----              | -----             | -----              | -----             | -----              | 492  |
| SIMLO11_ROOT        | -----              | -----             | -----              | -----             | -----              | 566  |
| SIMLO11_FLOWER      | -----              | -----             | -----              | -----             | -----              | 492  |
| SIMLO11_FRUIT       | -----              | -----             | -----              | -----             | -----              | 492  |
|                     | 1,060              |                   | 1,080              |                   | 1,100              |      |
| gDNA_Solyc01g102520 | <b>GCATTTAAAC</b>  | <b>GTATACTTAT</b> | <b>GGACTTATCC</b>  | <b>TTCAAGCCCA</b> | <b>AGATCGATAT</b>  | 1100 |
| cDNA_Solyc01g102520 | -----              | -----             | -----              | -----             | -----              | 519  |
| SIMLO11_LEAF        | -----              | -----             | -----              | -----             | -----              | 492  |
| SIMLO11_ROOT        | -----              | -----             | -----              | -----             | -----              | 566  |
| SIMLO11_FLOWER      | -----              | -----             | -----              | -----             | -----              | 492  |
| SIMLO11_FRUIT       | -----              | -----             | -----              | -----             | -----              | 492  |
|                     | 1,120              |                   | 1,140              |                   |                    |      |
| gDNA_Solyc01g102520 | <b>ACTTAAACAAT</b> | <b>TGTAATTATT</b> | <b>GCTAGCATTT</b>  | <b>TTCCCTAGTC</b> | <b>GTTAACTATT</b>  | 1150 |
| cDNA_Solyc01g102520 | -----              | -----             | -----              | -----             | -----              | 519  |
| SIMLO11_LEAF        | -----              | -----             | -----              | -----             | -----              | 492  |
| SIMLO11_ROOT        | -----              | -----             | -----              | -----             | -----              | 566  |
| SIMLO11_FLOWER      | -----              | -----             | -----              | -----             | -----              | 492  |
| SIMLO11_FRUIT       | -----              | -----             | -----              | -----             | -----              | 492  |
|                     | 1,160              |                   | 1,180              |                   | 1,200              |      |
| gDNA_Solyc01g102520 | <b>ATATTAATAT</b>  | <b>TCGATTGTGT</b> | <b>ATTGTAATAAT</b> | <b>TAACCATTTA</b> | <b>ACATTTTTTT</b>  | 1200 |
| cDNA_Solyc01g102520 | -----              | -----             | -----              | -----             | -----              | 519  |
| SIMLO11_LEAF        | -----              | -----             | -----              | -----             | -----              | 492  |
| SIMLO11_ROOT        | -----              | -----             | -----              | -----             | -----              | 566  |
| SIMLO11_FLOWER      | -----              | -----             | -----              | -----             | -----              | 492  |
| SIMLO11_FRUIT       | -----              | -----             | -----              | -----             | -----              | 492  |

|                     |                                                                  |       |  |       |      |
|---------------------|------------------------------------------------------------------|-------|--|-------|------|
|                     |                                                                  | 1,220 |  | 1,240 |      |
| gDNA_Solyc01g102520 | <b>AAGAGTAATT TTATCAGTAG ACAGAGTGTC TAGCGGTCTT TTATTGGAAA</b>    |       |  |       | 1250 |
| cDNA_Solyc01g102520 | -----                                                            |       |  |       | 519  |
| SIMLO11_LEAF        | -----                                                            |       |  |       | 492  |
| SIMLO11_ROOT        | -----                                                            |       |  |       | 566  |
| SIMLO11_FLOWER      | -----                                                            |       |  |       | 492  |
| SIMLO11_FRUIT       | -----                                                            |       |  |       | 492  |
|                     |                                                                  | 1,260 |  | 1,280 |      |
| gDNA_Solyc01g102520 | <b>ATAAAAAATAT ATCAATAGGA ATAAGTACAA GCAAGGAGGT TAGGCCGTAT</b>   |       |  |       | 1300 |
| cDNA_Solyc01g102520 | -----                                                            |       |  |       | 519  |
| SIMLO11_LEAF        | -----                                                            |       |  |       | 492  |
| SIMLO11_ROOT        | -----                                                            |       |  |       | 566  |
| SIMLO11_FLOWER      | -----                                                            |       |  |       | 492  |
| SIMLO11_FRUIT       | -----                                                            |       |  |       | 492  |
|                     |                                                                  | 1,320 |  | 1,340 |      |
| gDNA_Solyc01g102520 | <b>CTTACTATTC CTAATAAGAT AACAAATCTC TACTAATTAA CAAGCATCGA</b>    |       |  |       | 1350 |
| cDNA_Solyc01g102520 | -----                                                            |       |  |       | 519  |
| SIMLO11_LEAF        | -----                                                            |       |  |       | 492  |
| SIMLO11_ROOT        | -----                                                            |       |  |       | 566  |
| SIMLO11_FLOWER      | -----                                                            |       |  |       | 492  |
| SIMLO11_FRUIT       | -----                                                            |       |  |       | 492  |
|                     |                                                                  | 1,360 |  | 1,380 |      |
| gDNA_Solyc01g102520 | <b>AAAAATAAGA ACTAGAGAAA ACTACGTATA TGTATGATTG TCACGAAGTT</b>    |       |  |       | 1400 |
| cDNA_Solyc01g102520 | -----                                                            |       |  |       | 519  |
| SIMLO11_LEAF        | -----                                                            |       |  |       | 492  |
| SIMLO11_ROOT        | -----                                                            |       |  |       | 566  |
| SIMLO11_FLOWER      | -----                                                            |       |  |       | 492  |
| SIMLO11_FRUIT       | -----                                                            |       |  |       | 492  |
|                     |                                                                  | 1,420 |  | 1,440 |      |
| gDNA_Solyc01g102520 | <b>TATAACCCTC AACAAATGAG CAATACCTAA TTAGTTCTCT TTTATTTTTT</b>    |       |  |       | 1450 |
| cDNA_Solyc01g102520 | -----                                                            |       |  |       | 519  |
| SIMLO11_LEAF        | -----                                                            |       |  |       | 492  |
| SIMLO11_ROOT        | -----                                                            |       |  |       | 566  |
| SIMLO11_FLOWER      | -----                                                            |       |  |       | 492  |
| SIMLO11_FRUIT       | -----                                                            |       |  |       | 492  |
|                     |                                                                  | 1,460 |  | 1,480 |      |
| gDNA_Solyc01g102520 | <b>TGGGCCTCAA ATAGATACAA CAATGGAGAC ACTGGGAGAA CTCAATTCAA</b>    |       |  |       | 1500 |
| cDNA_Solyc01g102520 | -----                                                            |       |  |       | 555  |
| SIMLO11_LEAF        | -----                                                            |       |  |       | 528  |
| SIMLO11_ROOT        | -----                                                            |       |  |       | 602  |
| SIMLO11_FLOWER      | -----                                                            |       |  |       | 528  |
| SIMLO11_FRUIT       | -----                                                            |       |  |       | 528  |
|                     |                                                                  | 1,520 |  | 1,540 |      |
| gDNA_Solyc01g102520 | <b>AAGCAA TCAA AACCCACA TCA TGGTATAATT ATATTAGTTA ATTATTGTTT</b> |       |  |       | 1550 |
| cDNA_Solyc01g102520 | -----                                                            |       |  |       | 577  |
| SIMLO11_LEAF        | -----                                                            |       |  |       | 550  |
| SIMLO11_ROOT        | -----                                                            |       |  |       | 624  |
| SIMLO11_FLOWER      | -----                                                            |       |  |       | 550  |
| SIMLO11_FRUIT       | -----                                                            |       |  |       | 550  |
|                     |                                                                  | 1,560 |  | 1,580 |      |
| gDNA_Solyc01g102520 | <b>ATACAATTTT GTCTGTAATT TTTAACGAAT TATTACCATG ATATTTTCTA</b>    |       |  |       | 1600 |
| cDNA_Solyc01g102520 | -----                                                            |       |  |       | 577  |
| SIMLO11_LEAF        | -----                                                            |       |  |       | 550  |
| SIMLO11_ROOT        | -----                                                            |       |  |       | 624  |
| SIMLO11_FLOWER      | -----                                                            |       |  |       | 550  |
| SIMLO11_FRUIT       | -----                                                            |       |  |       | 550  |
|                     |                                                                  | 1,620 |  | 1,640 |      |
| gDNA_Solyc01g102520 | <b>TGTGTAGTGC ATATTCTCCA TATTCAATCA TTTGTGGATA GAGCTGGTAA</b>    |       |  |       | 1650 |
| cDNA_Solyc01g102520 | -----                                                            |       |  |       | 620  |
| SIMLO11_LEAF        | -----                                                            |       |  |       | 593  |
| SIMLO11_ROOT        | -----                                                            |       |  |       | 667  |
| SIMLO11_FLOWER      | -----                                                            |       |  |       | 593  |
| SIMLO11_FRUIT       | -----                                                            |       |  |       | 593  |
|                     |                                                                  | 1,660 |  | 1,700 |      |
| gDNA_Solyc01g102520 | <b>ACGTTGGAGA AAGTACGCTC TCATTAGTTG GACGGTACGA TGTTTTATTT</b>    |       |  |       | 1700 |
| cDNA_Solyc01g102520 | -----                                                            |       |  |       | 656  |
| SIMLO11_LEAF        | -----                                                            |       |  |       | 629  |
| SIMLO11_ROOT        | -----                                                            |       |  |       | 703  |
| SIMLO11_FLOWER      | -----                                                            |       |  |       | 629  |
| SIMLO11_FRUIT       | -----                                                            |       |  |       | 629  |
|                     |                                                                  | 1,720 |  | 1,740 |      |
| gDNA_Solyc01g102520 | <b>ATTAAGATC GATAATAATT ATGTATTTTA CTCAAAGAAA AATGACGATT</b>     |       |  |       | 1750 |
| cDNA_Solyc01g102520 | -----                                                            |       |  |       | 656  |
| SIMLO11_LEAF        | -----                                                            |       |  |       | 629  |
| SIMLO11_ROOT        | -----                                                            |       |  |       | 703  |
| SIMLO11_FLOWER      | -----                                                            |       |  |       | 629  |
| SIMLO11_FRUIT       | -----                                                            |       |  |       | 629  |
|                     |                                                                  | 1,760 |  | 1,800 |      |
| gDNA_Solyc01g102520 | <b>TTTCATGTGT ATGAATATAA AAAAAAATA TATATAGGTA GCATTTTTCA</b>     |       |  |       | 1800 |
| cDNA_Solyc01g102520 | -----                                                            |       |  |       | 667  |
| SIMLO11_LEAF        | -----                                                            |       |  |       | 640  |
| SIMLO11_ROOT        | -----                                                            |       |  |       | 714  |
| SIMLO11_FLOWER      | -----                                                            |       |  |       | 640  |
| SIMLO11_FRUIT       | -----                                                            |       |  |       | 640  |

|                     |                                                                |       |       |       |      |
|---------------------|----------------------------------------------------------------|-------|-------|-------|------|
|                     |                                                                | 1,820 |       | 1,840 |      |
| gDNA_Solyc01g102520 | <b>AACAATTTTA TGGTTCAGTA ACAAAGTCAG ACTATATTGT CTTGCGGACT</b>  |       |       |       | 1850 |
| cDNA_Solyc01g102520 | <b>AACAATTTTA TGGTTCAGTA ACAAAGTCAG ACTATATTGT CTTGCGGACT</b>  |       |       |       | 717  |
| SIMLO11_LEAF        | <b>AACAATTTTA TGGTTCAGTA ACAAAGTCAG ACTATATTGT CTTGCGGACT</b>  |       |       |       | 690  |
| SIMLO11_ROOT        | <b>AACAATTTTA TGGTTCAGTA ACAAAGTCAG ACTATATTGT CTTGCGGACT</b>  |       |       |       | 764  |
| SIMLO11_FLOWER      | <b>AACAATTTTA TGGTTCAGTA ACAAAGTCAG ACTATATTGT CTTGCGGACT</b>  |       |       |       | 690  |
| SIMLO11_FRUIT       | <b>AACAATTTTA TGGTTCAGTA ACAAAGTCAG ACTATATTGT CTTGCGGACT</b>  |       |       |       | 690  |
|                     |                                                                | 1,860 | 1,880 | 1,900 |      |
| gDNA_Solyc01g102520 | <b>GGATTTATCA AGGTAAGCAA TACTTAATTC TTTCTATTTT ATCTTTCATT</b>  |       |       |       | 1900 |
| cDNA_Solyc01g102520 | <b>GGATTTATCA AG</b> -----                                     |       |       |       | 729  |
| SIMLO11_LEAF        | <b>GGATTTATCA AG</b> -----                                     |       |       |       | 702  |
| SIMLO11_ROOT        | <b>GGATTTATCA AG</b> -----                                     |       |       |       | 776  |
| SIMLO11_FLOWER      | <b>GGATTTATCA AG</b> -----                                     |       |       |       | 702  |
| SIMLO11_FRUIT       | <b>GGATTTATCA AG</b> -----                                     |       |       |       | 702  |
|                     |                                                                | 1,920 | 1,940 |       |      |
| gDNA_Solyc01g102520 | <b>TTTATAATTA CTTTGTGTC AATCTATGAT TTTAATTAGT CGCAATTATA</b>   |       |       |       | 1950 |
| cDNA_Solyc01g102520 | -----                                                          |       |       |       | 729  |
| SIMLO11_LEAF        | -----                                                          |       |       |       | 702  |
| SIMLO11_ROOT        | -----                                                          |       |       |       | 776  |
| SIMLO11_FLOWER      | -----                                                          |       |       |       | 702  |
| SIMLO11_FRUIT       | -----                                                          |       |       |       | 702  |
|                     |                                                                | 1,960 | 1,980 | 2,000 |      |
| gDNA_Solyc01g102520 | <b>ATGCATTTTA TCGTGTGATA ATAGAAACAT TGTCCATCCA ATCCTACGTA</b>  |       |       |       | 2000 |
| cDNA_Solyc01g102520 | -----                                                          |       |       |       | 755  |
| SIMLO11_LEAF        | -----                                                          |       |       |       | 728  |
| SIMLO11_ROOT        | -----                                                          |       |       |       | 802  |
| SIMLO11_FLOWER      | -----                                                          |       |       |       | 728  |
| SIMLO11_FRUIT       | -----                                                          |       |       |       | 728  |
|                     |                                                                | 2,020 | 2,040 |       |      |
| gDNA_Solyc01g102520 | <b>TAATTTTCAC CGATATATTT TCGGGACACT GGAGCATGAC TTCAAAAAGA</b>  |       |       |       | 2050 |
| cDNA_Solyc01g102520 | <b>TAATTTTCAC CGATATATTT TCGGGACACT GGAGCATGAC TTCAAAAAGA</b>  |       |       |       | 805  |
| SIMLO11_LEAF        | <b>TAATTTTCAC CGATATATTT TCGGGACACT GGAGCATGAC TTCAAAAAGA</b>  |       |       |       | 778  |
| SIMLO11_ROOT        | <b>TAATTTTCAC CGATATATTT TCGGGACACT GGAGCATGAC TTCAAAAAGA</b>  |       |       |       | 852  |
| SIMLO11_FLOWER      | <b>TAATTTTCAC CGATATATTT TCGGGACACT GGAGCATGAC TTCAAAAAGA</b>  |       |       |       | 778  |
| SIMLO11_FRUIT       | <b>TAATTTTCAC CGATATATTT TCGGGACACT GGAGCATGAC TTCAAAAAGA</b>  |       |       |       | 778  |
|                     |                                                                | 2,060 | 2,080 | 2,100 |      |
| gDNA_Solyc01g102520 | <b>TTGTTGGAAT CAGGTA AACTACAT AACTAATTA TGTATAGGAT</b>         |       |       |       | 2100 |
| cDNA_Solyc01g102520 | <b>TTGTTGGAAT CAG</b> -----                                    |       |       |       | 818  |
| SIMLO11_LEAF        | <b>TTGTTGGAAT CAG</b> -----                                    |       |       |       | 791  |
| SIMLO11_ROOT        | <b>TTGTTGGAAT CAG</b> -----                                    |       |       |       | 865  |
| SIMLO11_FLOWER      | <b>TTGTTGGAAT CAG</b> -----                                    |       |       |       | 791  |
| SIMLO11_FRUIT       | <b>TTGTTGGAAT CAG</b> -----                                    |       |       |       | 791  |
|                     |                                                                | 2,120 | 2,140 |       |      |
| gDNA_Solyc01g102520 | <b>AATTACTTGG TAATTTATAT TTAATTATGT TTAATCGAGC TAATTTATGC</b>  |       |       |       | 2150 |
| cDNA_Solyc01g102520 | -----                                                          |       |       |       | 818  |
| SIMLO11_LEAF        | -----                                                          |       |       |       | 791  |
| SIMLO11_ROOT        | -----                                                          |       |       |       | 865  |
| SIMLO11_FLOWER      | -----                                                          |       |       |       | 791  |
| SIMLO11_FRUIT       | -----                                                          |       |       |       | 791  |
|                     |                                                                | 2,160 | 2,180 | 2,200 |      |
| gDNA_Solyc01g102520 | <b>TTTTTGAAA TTGATCTTGA ACAGCTGGTA CTTGTGGCTT TTTGTTGTTT</b>   |       |       |       | 2200 |
| cDNA_Solyc01g102520 | -----                                                          |       |       |       | 844  |
| SIMLO11_LEAF        | -----                                                          |       |       |       | 817  |
| SIMLO11_ROOT        | -----                                                          |       |       |       | 891  |
| SIMLO11_FLOWER      | -----                                                          |       |       |       | 817  |
| SIMLO11_FRUIT       | -----                                                          |       |       |       | 817  |
|                     |                                                                | 2,220 | 2,240 |       |      |
| gDNA_Solyc01g102520 | <b>TGTTTTTGT GATCAACATT GCAGGTATTA ATTTTTATC CTAAGTATTA</b>    |       |       |       | 2250 |
| cDNA_Solyc01g102520 | <b>TGTTTTTGT GATCAACATT GCAGG</b> -----                        |       |       |       | 869  |
| SIMLO11_LEAF        | <b>TGTTTTTGT GATCAACATT GCAGG</b> -----                        |       |       |       | 842  |
| SIMLO11_ROOT        | <b>TGTTTTTGT GATCAACATT GCAGG</b> -----                        |       |       |       | 916  |
| SIMLO11_FLOWER      | <b>TGTTTTTGT GATCAACATT GCAGG</b> -----                        |       |       |       | 842  |
| SIMLO11_FRUIT       | <b>TGTTTTTGT GATCAACATT GCAGG</b> -----                        |       |       |       | 842  |
|                     |                                                                | 2,260 | 2,280 | 2,300 |      |
| gDNA_Solyc01g102520 | <b>CTAAATCTTA CTCCTAATTT TGCTACTTTT TTTTTTTAA TATCTTATTA</b>   |       |       |       | 2300 |
| cDNA_Solyc01g102520 | -----                                                          |       |       |       | 869  |
| SIMLO11_LEAF        | -----                                                          |       |       |       | 842  |
| SIMLO11_ROOT        | -----                                                          |       |       |       | 916  |
| SIMLO11_FLOWER      | -----                                                          |       |       |       | 842  |
| SIMLO11_FRUIT       | -----                                                          |       |       |       | 842  |
|                     |                                                                | 2,320 | 2,340 |       |      |
| gDNA_Solyc01g102520 | <b>TATATGTTTC GCTTAAACTA ATGTATGGTT TAAAATATGC AGGATGGCAC</b>  |       |       |       | 2350 |
| cDNA_Solyc01g102520 | -----                                                          |       |       |       | 876  |
| SIMLO11_LEAF        | -----                                                          |       |       |       | 849  |
| SIMLO11_ROOT        | -----                                                          |       |       |       | 923  |
| SIMLO11_FLOWER      | -----                                                          |       |       |       | 849  |
| SIMLO11_FRUIT       | -----                                                          |       |       |       | 849  |
|                     |                                                                | 2,360 | 2,380 | 2,400 |      |
| gDNA_Solyc01g102520 | <b>TCTTACTTTT GGCTATCATT TTTACCTCTT GTTGTAAAGTG ACCATTGAAA</b> |       |       |       | 2400 |
| cDNA_Solyc01g102520 | <b>TCTTACTTTT GGCTATCATT TTTACCTCTT GTT</b> -----              |       |       |       | 909  |
| SIMLO11_LEAF        | <b>TCTTACTTTT GGCTATCATT TTTACCTCTT GTT</b> -----              |       |       |       | 882  |
| SIMLO11_ROOT        | <b>TCTTACTTTT GGCTATCATT TTTACCTCTT GTT</b> -----              |       |       |       | 956  |
| SIMLO11_FLOWER      | <b>TCTTACTTTT GGCTATCATT TTTACCTCTT GTT</b> -----              |       |       |       | 882  |
| SIMLO11_FRUIT       | <b>TCTTACTTTT GGCTATCATT TTTACCTCTT GTT</b> -----              |       |       |       | 882  |



|                     |                     |                    |                     |                    |                     |
|---------------------|---------------------|--------------------|---------------------|--------------------|---------------------|
|                     |                     | 2,420              |                     | 2,440              |                     |
| gDNA_Solyc01g102520 | <b>A</b> ACTGGTTTG  | <b>C</b> TGCATCTGT | <b>T</b> TGAATAAAT  | <b>T</b> GGGATAAGA | <b>C</b> TATATGAAT  |
| cDNA_Solyc01g102520 | -----               | -----              | -----               | -----              | -----               |
| SIMLO11_LEAF        | -----               | -----              | -----               | -----              | -----               |
| SIMLO11_ROOT        | -----               | -----              | -----               | -----              | -----               |
| SIMLO11_FLOWER      | -----               | -----              | -----               | -----              | -----               |
| SIMLO11_FRUIT       | -----               | -----              | -----               | -----              | -----               |
|                     | 2,460               |                    | 2,480               |                    | 2,500               |
| gDNA_Solyc01g102520 | <b>C</b> ACCACGTGC  | <b>C</b> ATATTTGAC | <b>G</b> ATGTGTATA  | <b>T</b> TTTTGATAA | <b>A</b> ATTTATGCA  |
| cDNA_Solyc01g102520 | -----               | -----              | -----               | -----              | -----               |
| SIMLO11_LEAF        | -----               | -----              | -----               | -----              | -----               |
| SIMLO11_ROOT        | -----               | -----              | -----               | -----              | -----               |
| SIMLO11_FLOWER      | -----               | -----              | -----               | -----              | -----               |
| SIMLO11_FRUIT       | -----               | -----              | -----               | -----              | -----               |
|                     |                     | 2,520              |                     | 2,540              |                     |
| gDNA_Solyc01g102520 | <b>G</b> CTACTACTT  | <b>C</b> TAGTAGGAA | <b>C</b> AAAAATTGGA | <b>G</b> CACATAATA | <b>A</b> CAGAATTGG  |
| cDNA_Solyc01g102520 | -CTACTACTT          | CTAGTAGGAA         | CAAAAATTGGA         | GCACATAATA         | ACAGAATTGG          |
| SIMLO11_LEAF        | -CTACTACTT          | CTAGTAGGAA         | CAAAAATTGGA         | GCACATAATA         | ACAGAATTGG          |
| SIMLO11_ROOT        | -CTACTACTT          | CTAGTAGGAA         | CAAAAATTGGA         | GCACATAATA         | ACAGAATTGG          |
| SIMLO11_FLOWER      | -CTACTACTT          | CTAGTAGGAA         | CAAAAATTGGA         | GCACATAATA         | ACAGAATTGG          |
| SIMLO11_FRUIT       | -CTACTACTT          | CTAGTAGGAA         | CAAAAATTGGA         | GCACATAATA         | ACAGAATTGG          |
|                     | 2,560               |                    | 2,580               |                    | 2,600               |
| gDNA_Solyc01g102520 | <b>C</b> TCAAGAGGT  | <b>T</b> TCAGAGAGG | <b>T</b> CATCAGTAG  | <b>T</b> AGATGAAAC | <b>C</b> ACACCAATT  |
| cDNA_Solyc01g102520 | CTCAAGAGGT          | TTCAGAGAGG         | TCATCAGTAG          | TAGATGAAAC         | CACACCAATT          |
| SIMLO11_LEAF        | CTCAAGAGGT          | TTCAGAGAGG         | TCATCAGTAG          | TAGATGAAAC         | CACACCAATT          |
| SIMLO11_ROOT        | CTCAAGAGGT          | TTCAGAGAGG         | TCATCAGTAG          | TAGATGAAAC         | CACACCAATT          |
| SIMLO11_FLOWER      | CTCAAGAGGT          | TTCAGAGAGG         | TCATCAGTAG          | TAGATGAAAC         | CACACCAATT          |
| SIMLO11_FRUIT       | CTCAAGAGGT          | TTCAGAGAGG         | TCATCAGTAG          | TAGATGAAAC         | CACACCAATT          |
|                     |                     | 2,620              |                     | 2,640              |                     |
| gDNA_Solyc01g102520 | <b>A</b> AACCTTCTG  | <b>A</b> TGAGTTGTT | <b>T</b> TGGTTTGAC  | <b>A</b> GTCCAAATC | <b>T</b> TGTCCTTTA  |
| cDNA_Solyc01g102520 | AAACCTTCTG          | ATGAGTTGTT         | TTGGTTTGAC          | AGTCCAAATC         | TTGTCCCTTTA         |
| SIMLO11_LEAF        | AAACCTTCTG          | ATGAGTTGTT         | TTGGTTTGAC          | AGTCCAAATC         | TTGTCCCTTTA         |
| SIMLO11_ROOT        | AAACCTTCTG          | ATGAGTTGTT         | TTGGTTTGAC          | AGTCCAAATC         | TTGTCCCTTTA         |
| SIMLO11_FLOWER      | AAACCTTCTG          | ATGAGTTGTT         | TTGGTTTGAC          | AGTCCAAATC         | TTGTCCCTTTA         |
| SIMLO11_FRUIT       | AAACCTTCTG          | ATGAGTTGTT         | TTGGTTTGAC          | AGTCCAAATC         | TTGTCCCTTTA         |
|                     | 2,660               |                    | 2,680               |                    | 2,700               |
| gDNA_Solyc01g102520 | <b>C</b> CTAATCCAC  | <b>T</b> TCATTTTGT | <b>T</b> CCAAAACCTC | <b>C</b> TTTGAGATT | <b>G</b> CTTTCTTTG  |
| cDNA_Solyc01g102520 | CCTAATCCAC          | TTCATTTTGT         | TCCAAAACCTC         | CTTTGAGATT         | GCTTTCTTTG          |
| SIMLO11_LEAF        | CCTAATCCAC          | TTCATTTTGT         | TCCAAAACCTC         | CTTTGAGATT         | GCTTTCTTTG          |
| SIMLO11_ROOT        | CCTAATCCAC          | TTCATTTTGT         | TCCAAAACCTC         | CTTTGAGATT         | GCTTTCTTTG          |
| SIMLO11_FLOWER      | CCTAATCCAC          | TTCATTTTGT         | TCCAAAACCTC         | CTTTGAGATT         | GCTTTCTTTG          |
| SIMLO11_FRUIT       | CCTAATCCAC          | TTCATTTTGT         | TCCAAAACCTC         | CTTTGAGATT         | GCTTTCTTTG          |
|                     |                     | 2,720              |                     | 2,740              |                     |
| gDNA_Solyc01g102520 | <b>T</b> CTGGATTTG  | <b>G</b> GTAATAACT | <b>T</b> TTAACTTCT  | <b>T</b> TTATTTCAA | <b>C</b> TTAACTTCA  |
| cDNA_Solyc01g102520 | TCTGGATTTG          | G-----             | -----               | -----              | -----               |
| SIMLO11_LEAF        | TCTGGATTTG          | G-----             | -----               | -----              | -----               |
| SIMLO11_ROOT        | TCTGGATTTG          | G-----             | -----               | -----              | -----               |
| SIMLO11_FLOWER      | TCTGGATTTG          | G-----             | -----               | -----              | -----               |
| SIMLO11_FRUIT       | TCTGGATTTG          | G-----             | -----               | -----              | -----               |
|                     | 2,760               |                    | 2,780               |                    | 2,800               |
| gDNA_Solyc01g102520 | <b>A</b> TCACITTTTC | <b>T</b> TCTTTTCTA | <b>A</b> CATGAAAAA  | <b>A</b> ACTGTCATT | <b>T</b> GACAATTCT  |
| cDNA_Solyc01g102520 | -----               | -----              | -----               | -----              | -----               |
| SIMLO11_LEAF        | -----               | -----              | -----               | -----              | -----               |
| SIMLO11_ROOT        | -----               | -----              | -----               | -----              | -----               |
| SIMLO11_FLOWER      | -----               | -----              | -----               | -----              | -----               |
| SIMLO11_FRUIT       | -----               | -----              | -----               | -----              | -----               |
|                     |                     | 2,820              |                     | 2,840              |                     |
| gDNA_Solyc01g102520 | <b>C</b> CAGTGTACT  | <b>T</b> ATGGATTCA | <b>A</b> ATCATGCAT  | <b>C</b> ATGGAAGAT | <b>T</b> TGGGTTTCA  |
| cDNA_Solyc01g102520 | ---TGTACT           | TATGGATTCA         | AATCATGCAT          | CATGGAAGAT         | TTGGGTTTCA          |
| SIMLO11_LEAF        | ---TGTACT           | TATGGATTCA         | AATCATGCAT          | CATGGAAGAT         | TTGGGTTTCA          |
| SIMLO11_ROOT        | ---TGTACT           | TATGGATTCA         | AATCATGCAT          | CATGGAAGAT         | TTGGGTTTCA          |
| SIMLO11_FLOWER      | ---TGTACT           | TATGGATTCA         | AATCATGCAT          | CATGGAAGAT         | TTGGGTTTCA          |
| SIMLO11_FRUIT       | ---TGTACT           | TATGGATTCA         | AATCATGCAT          | CATGGAAGAT         | TTGGGTTTCA          |
|                     | 2,860               |                    | 2,880               |                    | 2,900               |
| gDNA_Solyc01g102520 | <b>T</b> TATTCCAAG  | <b>A</b> CTTATTATT | <b>G</b> GGTAAGCTA  | <b>C</b> TCAAATCCC | <b>A</b> TATAGTAAT  |
| cDNA_Solyc01g102520 | TTATTCCAAG          | ACTTATTATT         | GGG-----            | -----              | -----               |
| SIMLO11_LEAF        | TTATTCCAAG          | ACTTATTATT         | GGG-----            | -----              | -----               |
| SIMLO11_ROOT        | TTATTCCAAG          | ACTTATTATT         | GGG-----            | -----              | -----               |
| SIMLO11_FLOWER      | TTATTCCAAG          | ACTTATTATT         | GGG-----            | -----              | -----               |
| SIMLO11_FRUIT       | TTATTCCAAG          | ACTTATTATT         | GGG-----            | -----              | -----               |
|                     |                     | 2,920              |                     | 2,940              |                     |
| gDNA_Solyc01g102520 | <b>A</b> TGTTTCTGA  | <b>C</b> AGAAAGTGA | <b>C</b> CATGTAGAT  | <b>T</b> TTGTGGTGC | <b>C</b> ACAGGGTGA  |
| cDNA_Solyc01g102520 | -----               | -----              | -----               | -----              | -----GTGA           |
| SIMLO11_LEAF        | -----               | -----              | -----               | -----              | -----GTGA           |
| SIMLO11_ROOT        | -----               | -----              | -----               | -----              | -----GTGA           |
| SIMLO11_FLOWER      | -----               | -----              | -----               | -----              | -----GTGA           |
| SIMLO11_FRUIT       | -----               | -----              | -----               | -----              | -----GTGA           |
|                     | 2,960               |                    | 2,980               |                    | 3,000               |
| gDNA_Solyc01g102520 | <b>T</b> TGTTCAAAGT | <b>T</b> CTTTGCAGT | <b>T</b> ACAGTACTC  | <b>T</b> GCCCTTATA | <b>T</b> GCTCTTGTCT |
| cDNA_Solyc01g102520 | TTGTTCAAAGT         | TCTTTGCAGT         | TACAGTACTC          | TGCCCTTATA         | TGCTCTTGTCT         |
| SIMLO11_LEAF        | TTGTTCAAAGT         | TCTTTGCAGT         | TACAGTACTC          | TGCCCTTATA         | TGCTCTTGTCT         |
| SIMLO11_ROOT        | TTGTTCAAAGT         | TCTTTGCAGT         | TACAGTACTC          | TGCCCTTATA         | TGCTCTTGTCT         |
| SIMLO11_FLOWER      | TTGTTCAAAGT         | TCTTTGCAGT         | TACAGTACTC          | TGCCCTTATA         | TGCTCTTGTCT         |
| SIMLO11_FRUIT       | TTGTTCAAAGT         | TCTTTGCAGT         | TACAGTACTC          | TGCCCTTATA         | TGCTCTTGTCT         |

|                     |                             |                    |                      |                       |                    |      |
|---------------------|-----------------------------|--------------------|----------------------|-----------------------|--------------------|------|
|                     |                             |                    | 3,020                |                       | 3,040              |      |
| gDNA_Solyc01g102520 | <b>ACACAGG TAA</b>          | <b>ATAAA TACCT</b> | <b>GTCTCATTCT</b>    | <b>GTTTACTCAG</b>     | <b>AGGCC TCTTT</b> | 3050 |
| cDNA_Solyc01g102520 | <b>ACACAG</b>               |                    |                      |                       |                    | 1248 |
| SIMLO11_LEAF        | <b>ACACAG</b>               |                    |                      |                       |                    | 1221 |
| SIMLO11_ROOT        | <b>ACACAG</b>               |                    |                      |                       |                    | 1295 |
| SIMLO11_FLOWER      | <b>ACACAG</b>               |                    |                      |                       |                    | 1221 |
| SIMLO11_FRUIT       | <b>ACACAG</b>               |                    |                      |                       |                    | 1221 |
|                     | 3,060                       |                    | 3,080                |                       | 3,100              |      |
| gDNA_Solyc01g102520 | <b>CTTATTGAGG</b>           | <b>ACTCTTTTTT</b>  | <b>TTTCCACAAC</b>    | <b>AGATGGGAAC</b>     | <b>CACATATAAG</b>  | 3100 |
| cDNA_Solyc01g102520 |                             |                    |                      | <b>-ATGGGAAC</b>      | <b>CACATATAAG</b>  | 1266 |
| SIMLO11_LEAF        |                             |                    |                      | <b>-ATGGGAAC</b>      | <b>CACATATAAG</b>  | 1239 |
| SIMLO11_ROOT        |                             |                    |                      | <b>-ATGGGAAC</b>      | <b>CACATATAAG</b>  | 1313 |
| SIMLO11_FLOWER      |                             |                    |                      | <b>-ATGGGAAC</b>      | <b>CACATATAAG</b>  | 1239 |
| SIMLO11_FRUIT       |                             |                    |                      | <b>-ATGGGAAC</b>      | <b>CACATATAAG</b>  | 1239 |
|                     |                             | 3,120              |                      | 3,140                 |                    |      |
| gDNA_Solyc01g102520 | <b>AGAGGAA TAT</b>          | <b>TTGGT GAGCA</b> | <b>GACAGAAGA T</b>   | <b>TCTCT GAGGA</b>    | <b>TATGGGC TGG</b> | 3150 |
| cDNA_Solyc01g102520 | <b>AGAGGAA TAT</b>          | <b>TTGGT GAGCA</b> | <b>GACAGAAGA T</b>   | <b>TCTCT GAGGA</b>    | <b>TATGGGC TGG</b> | 1316 |
| SIMLO11_LEAF        | <b>AGAGGAA TAT</b>          | <b>TTGGT GAGCA</b> | <b>GACAGAAGA T</b>   | <b>TCTCT GAGGA</b>    | <b>TATGGGC TGG</b> | 1289 |
| SIMLO11_ROOT        | <b>AGAGGAA TAT</b>          | <b>TTGGT GAGCA</b> | <b>GACAGAAGA T</b>   | <b>TCTCT GAGGA</b>    | <b>TATGGGC TGG</b> | 1363 |
| SIMLO11_FLOWER      | <b>AGAGGAA TAT</b>          | <b>TTGGT GAGCA</b> | <b>GACAGAAGA T</b>   | <b>TCTCT GAGGA</b>    | <b>TATGGGC TGG</b> | 1289 |
| SIMLO11_FRUIT       | <b>AGAGGAA TAT</b>          | <b>TTGGT GAGCA</b> | <b>GACAGAAGA T</b>   | <b>TCTCT GAGGA</b>    | <b>TATGGGC TGG</b> | 1289 |
|                     | 3,160                       |                    | 3,180                |                       | 3,200              |      |
| gDNA_Solyc01g102520 | <b>TACATCAAGC</b>           | <b>CACAATAAGA</b>  | <b>TGGTCACAGA</b>    | <b>AACACAAGAA</b>     | <b>AGCATCACTG</b>  | 3200 |
| cDNA_Solyc01g102520 | <b>TACATCAAGC</b>           | <b>CACAATAAGA</b>  | <b>TGGTCACAGA</b>    | <b>AACACAAGAA</b>     | <b>AGCATCACTG</b>  | 1366 |
| SIMLO11_LEAF        | <b>TACATCAAGC</b>           | <b>CACAATAAGA</b>  | <b>TGGTCACAGA</b>    | <b>AACACAAGAA</b>     | <b>AGCATCACTG</b>  | 1339 |
| SIMLO11_ROOT        | <b>TACATCAAGC</b>           | <b>CACAATAAGA</b>  | <b>TGGTCACAGA</b>    | <b>AACACAAGAA</b>     | <b>AGCATCACTG</b>  | 1413 |
| SIMLO11_FLOWER      | <b>TACATCAAGC</b>           | <b>CACAATAAGA</b>  | <b>TGGTCACAGA</b>    | <b>AACACAAGAA</b>     | <b>AGCATCACTG</b>  | 1339 |
| SIMLO11_FRUIT       | <b>TACATCAAGC</b>           | <b>CACAATAAGA</b>  | <b>TGGTCACAGA</b>    | <b>AACACAAGAA</b>     | <b>AGCATCACTG</b>  | 1339 |
|                     |                             | 3,220              |                      | 3,240                 |                    |      |
| gDNA_Solyc01g102520 | <b>TTTCTAACAG</b>           | <b>ACCTGCATGC</b>  | <b>AATGAAATTC</b>    | <b>AAGACATTTT</b>     | <b>ATCAACTGTT</b>  | 3250 |
| cDNA_Solyc01g102520 | <b>TTTCTAACAG</b>           | <b>ACCTGCATGC</b>  | <b>AATGAAATTC</b>    | <b>AAGACATTTT</b>     | <b>ATCAACTGTT</b>  | 1416 |
| SIMLO11_LEAF        | <b>TTTCTAACAG</b>           | <b>ACCTGCATGC</b>  | <b>AATGAAATTC</b>    | <b>AAGACATTTT</b>     | <b>ATCAACTGTT</b>  | 1389 |
| SIMLO11_ROOT        | <b>TTTCTAACAG</b>           | <b>ACCTGCATGC</b>  | <b>AATGAAATTC</b>    | <b>AAGACATTTT</b>     | <b>ATCAACTGTT</b>  | 1463 |
| SIMLO11_FLOWER      | <b>TTTCTAACAG</b>           | <b>ACCTGCATGC</b>  | <b>AATGAAATTC</b>    | <b>AAGACATTTT</b>     | <b>ATCAACTGTT</b>  | 1389 |
| SIMLO11_FRUIT       | <b>TTTCTAACAG</b>           | <b>ACCTGCATGC</b>  | <b>AATGAAATTC</b>    | <b>AAGACATTTT</b>     | <b>ATCAACTGTT</b>  | 1389 |
|                     | 3,260                       |                    | 3,280                |                       | 3,300              |      |
| gDNA_Solyc01g102520 | <b>GAGCTTTCTT</b>           | <b>ATCCAAACAA</b>  | <b>GCCTCACACT</b>    | <b>ACTCCTTAGT</b>     | <b>TGTACAGTTA</b>  | 3300 |
| cDNA_Solyc01g102520 | <b>GAGCTTTCTT</b>           | <b>ATCCAAACAA</b>  | <b>GCCTCACACT</b>    | <b>ACTCCTTAGT</b>     | <b>TGTACAGTTA</b>  | 1466 |
| SIMLO11_LEAF        | <b>GAGC TTT C T T A T</b>   | <b>CCAAACAA</b>    | <b>GCC T CACAC T</b> | <b>AC T CC T T AG</b> |                    | 1428 |
| SIMLO11_ROOT        | <b>GAGC T T T C T T A T</b> | <b>CCAAACAA</b>    | <b>GCC T CACAC T</b> | <b>AC T CC T T AG</b> |                    | 1502 |
| SIMLO11_FLOWER      | <b>GAGC T T T C T T A T</b> | <b>CCAAACAA</b>    | <b>GCC T CACAC T</b> | <b>AC T CC T T AG</b> |                    | 1428 |
| SIMLO11_FRUIT       | <b>GAGC TTTCTT</b>          | <b>ATCCAAACAA</b>  | <b>GCCTCACACT</b>    | <b>ACTCCTTAGT</b>     |                    | 1428 |
|                     |                             | 3,320              |                      | 3,340                 |                    |      |
| gDNA_Solyc01g102520 | <b>CTGGTTTTTC</b>           | <b>TTGAGTGTAA</b>  | <b>AAAATAAGGA</b>    | <b>TGAACAATAC</b>     | <b>ATTATTCTTT</b>  | 3350 |
| cDNA_Solyc01g102520 | <b>CTGGTTTTTC</b>           | <b>TTGAGTGTAA</b>  | <b>AAAATAAGGA</b>    | <b>TGAACAATAC</b>     | <b>ATTATTCTTT</b>  | 1516 |
| SIMLO11_LEAF        |                             |                    |                      |                       |                    | 1428 |
| SIMLO11_ROOT        |                             |                    |                      |                       |                    | 1502 |
| SIMLO11_FLOWER      |                             |                    |                      |                       |                    | 1428 |
| SIMLO11_FRUIT       |                             |                    |                      |                       |                    | 1428 |
|                     | 3,360                       |                    | 3,380                |                       | 3,400              |      |
| gDNA_Solyc01g102520 | <b>AAAGAGTAAA</b>           | <b>CATTGTAAAC</b>  | <b>TTTTCACTGA</b>    | <b>GAGGGAGAGA</b>     | <b>TGTTTCATGCT</b> | 3400 |
| cDNA_Solyc01g102520 | <b>AAAGAGTAAA</b>           | <b>CATTGTAAAC</b>  | <b>TTTTCACTGA</b>    | <b>GAGGGAGAGA</b>     | <b>TGTTTCATGCT</b> | 1566 |
| SIMLO11_LEAF        |                             |                    |                      |                       |                    | 1428 |
| SIMLO11_ROOT        |                             |                    |                      |                       |                    | 1502 |
| SIMLO11_FLOWER      |                             |                    |                      |                       |                    | 1428 |
| SIMLO11_FRUIT       |                             |                    |                      |                       |                    | 1428 |
|                     |                             | 3,420              |                      | 3,440                 |                    |      |
| gDNA_Solyc01g102520 | <b>GCCTAATCAA</b>           | <b>ATGTTGT CAT</b> | <b>CATTTTCCAA</b>    | <b>TATCAATTAG</b>     | <b>CCCAGGCATC</b>  | 3450 |
| cDNA_Solyc01g102520 | <b>GCCTAATCAA</b>           | <b>ATGTTGT CAT</b> | <b>CATTTTCCAA</b>    | <b>TATCAATTAG</b>     | <b>CCCAGGCATC</b>  | 1616 |
| SIMLO11_LEAF        |                             |                    |                      |                       |                    | 1428 |
| SIMLO11_ROOT        |                             |                    |                      |                       |                    | 1502 |
| SIMLO11_FLOWER      |                             |                    |                      |                       |                    | 1428 |
| SIMLO11_FRUIT       |                             |                    |                      |                       |                    | 1428 |
|                     | 3,460                       |                    | 3,480                |                       | 3,500              |      |
| gDNA_Solyc01g102520 | <b>ATCTCTAGTT</b>           | <b>ACACAACACC</b>  | <b>TATTTTTTTT</b>    | <b>TCTTCTGCGA</b>     | <b>AAAGCATCTC</b>  | 3500 |
| cDNA_Solyc01g102520 | <b>ATCTCTAGTT</b>           | <b>ACACAACACC</b>  | <b>TATTTTTTTT</b>    | <b>TCTTCTGCGA</b>     | <b>AAAGCATCTC</b>  | 1666 |
| SIMLO11_LEAF        |                             |                    |                      |                       |                    | 1428 |
| SIMLO11_ROOT        |                             |                    |                      |                       |                    | 1502 |
| SIMLO11_FLOWER      |                             |                    |                      |                       |                    | 1428 |
| SIMLO11_FRUIT       |                             |                    |                      |                       |                    | 1428 |
|                     |                             | 3,520              |                      | 3,540                 |                    |      |
| gDNA_Solyc01g102520 | <b>CCAA TTT CCT</b>         | <b>AGTTACAAA T</b> | <b>ATGGAGGGAC</b>    | <b>GCATAAAAACA</b>    | <b>TTTCCC TCTT</b> | 3550 |
| cDNA_Solyc01g102520 | <b>CCAA TTT CCT</b>         | <b>AGTTACAAA T</b> | <b>ATGGAGGGAC</b>    | <b>GCATAAAAACA</b>    | <b>TTTCCC TCTT</b> | 1716 |
| SIMLO11_LEAF        |                             |                    |                      |                       |                    | 1428 |
| SIMLO11_ROOT        |                             |                    |                      |                       |                    | 1502 |
| SIMLO11_FLOWER      |                             |                    |                      |                       |                    | 1428 |
| SIMLO11_FRUIT       |                             |                    |                      |                       |                    | 1428 |
|                     | 3,560                       |                    | 3,580                |                       |                    |      |
| gDNA_Solyc01g102520 | <b>TAGCTCAAAT</b>           | <b>TATTTACACA</b>  | <b>CTAGTTATCT</b>    |                       |                    | 3580 |
| cDNA_Solyc01g102520 | <b>TAGCTCAAAT</b>           | <b>TATTTACACA</b>  | <b>CTAGTTATCT</b>    |                       |                    | 1746 |
| SIMLO11_LEAF        |                             |                    |                      |                       |                    | 1428 |
| SIMLO11_ROOT        |                             |                    |                      |                       |                    | 1502 |
| SIMLO11_FLOWER      |                             |                    |                      |                       |                    | 1428 |
| SIMLO11_FRUIT       |                             |                    |                      |                       |                    | 1428 |



|                     |                     |                    |                   |                   |                   |
|---------------------|---------------------|--------------------|-------------------|-------------------|-------------------|
|                     |                     | 620                |                   | 640               |                   |
| gDNA_Solyc10g044510 | <b>AATTTGAAAT</b>   | <b>TATAGTAAAT</b>  | <b>CATGTTTTCT</b> | <b>ACTAATTAAC</b> | <b>CACAAATCTT</b> |
| cDNASolyc10g044510  | .....               | .....              | .....             | .....             | .....             |
| SIMLO13_LEAF        | .....               | .....              | .....             | .....             | .....             |
| SIMLO13_ROOT        | .....               | .....              | .....             | .....             | .....             |
| SIMLO13_FLOWER      | .....               | .....              | .....             | .....             | .....             |
| SIMLO13_FRUIT       | .....               | .....              | .....             | .....             | .....             |
|                     | 660                 |                    | 680               |                   | 700               |
| gDNA_Solyc10g044510 | <b>TAA CAGG GAC</b> | <b>GTGAACCTTT</b>  | <b>TGTTTCCTAT</b> | <b>GAAGGTCTTG</b> | <b>AACAGCTTCA</b> |
| cDNASolyc10g044510  | -----GAC            | GTGAACCTTT         | TGTTTCCTAT        | GAAGGTCTTG        | AACAGCTTCA        |
| SIMLO13_LEAF        | -----AGG GAC        | GTGAACCTTT         | TGTTTCCTAT        | GAAGGTCTTG        | AACAGCTTCA        |
| SIMLO13_ROOT        | -----GAC            | GTGAACCTTT         | TGTTTCCTAT        | GAAGGTCTTG        | AACAGCTTCA        |
| SIMLO13_FLOWER      | -----GAC            | GTGAACCTTT         | TGTTTCCTAT        | GAAGGTCTTG        | AACAGCTTCA        |
| SIMLO13_FRUIT       | -----GAC            | GTGAACCTTT         | TGTTTCCTAT        | GAAGGTCTTG        | AACAGCTTCA        |
|                     | 720                 |                    | 740               |                   |                   |
| gDNA_Solyc10g044510 | <b>CCGCTTCC TT</b>  | <b>TTTGTTCCTG</b>  | <b>GTATCACTCA</b> | <b>TGTTCTCTAC</b> | <b>AGTTGTATTG</b> |
| cDNASolyc10g044510  | CCGCTTCC TT         | TTTGTTCCTG         | GTATCACTCA        | TGTTCTCTAC        | AGTTGTATTG        |
| SIMLO13_LEAF        | CCGCTTCC TT         | TTTGTTCCTG         | GTATCACTCA        | TGTTCTCTAC        | AGTTGTATTG        |
| SIMLO13_ROOT        | CCGCTTCC TT         | TTTGTTCCTG         | GTATCACTCA        | TGTTCTCTAC        | AGTTGTATTG        |
| SIMLO13_FLOWER      | CCGCTTCC TT         | TTTGTTCCTG         | GTATCACTCA        | TGTTCTCTAC        | AGTTGTATTG        |
| SIMLO13_FRUIT       | CCGCTTCC TT         | TTTGTTCCTG         | GTATCGCCCA        | TGTTCTCTAC        | AGTTGTATTG        |
|                     | 760                 |                    | 780               |                   | 800               |
| gDNA_Solyc10g044510 | <b>TCGTTGGCTT</b>   | <b>GGCCATGACC</b>  | <b>AAGGTACACT</b> | <b>TTCCATATCA</b> | <b>AAAATATTTA</b> |
| cDNASolyc10g044510  | TCGTTGGCTT          | GGCCATGACC         | AAG               | TTCCATATCA        | AAAATATTTA        |
| SIMLO13_LEAF        | TCGTTGGCTT          | GGCCATGACC         | AAG               | TTCCATATCA        | AAAATATTTA        |
| SIMLO13_ROOT        | TCGTTGGCTT          | GGCCATGACC         | AAG               | TTCCATATCA        | AAAATATTTA        |
| SIMLO13_FLOWER      | TCGTTGGCTT          | GGCCATGACC         | AAG               | TTCCATATCA        | AAAATATTTA        |
| SIMLO13_FRUIT       | TCGTTGGCTT          | GGCCATGACC         | AAG               | TTCCATATCA        | AAAATATTTA        |
|                     | 820                 |                    | 840               |                   |                   |
| gDNA_Solyc10g044510 | <b>AATCATGTGC</b>   | <b>CCTAGTCTAT</b>  | <b>TTTATGCTAG</b> | <b>TGCTTGATG</b>  | <b>TGAGTTTAAT</b> |
| cDNASolyc10g044510  | .....               | .....              | .....             | .....             | .....             |
| SIMLO13_LEAF        | .....               | .....              | .....             | .....             | .....             |
| SIMLO13_ROOT        | .....               | .....              | .....             | .....             | .....             |
| SIMLO13_FLOWER      | .....               | .....              | .....             | .....             | .....             |
| SIMLO13_FRUIT       | .....               | .....              | .....             | .....             | .....             |
|                     | 860                 |                    | 880               |                   | 900               |
| gDNA_Solyc10g044510 | <b>TTTACGGAGG</b>   | <b>TTGACTAGAC</b>  | <b>ACTAGCTACA</b> | <b>CTCATGTCAA</b> | <b>GATGTTCAAT</b> |
| cDNASolyc10g044510  | .....               | .....              | .....             | .....             | .....             |
| SIMLO13_LEAF        | .....               | .....              | .....             | .....             | .....             |
| SIMLO13_ROOT        | .....               | .....              | .....             | .....             | .....             |
| SIMLO13_FLOWER      | .....               | .....              | .....             | .....             | .....             |
| SIMLO13_FRUIT       | .....               | .....              | .....             | .....             | .....             |
|                     | 920                 |                    | 940               |                   |                   |
| gDNA_Solyc10g044510 | <b>TGGACACCTT</b>   | <b>TTGTCAAAAA</b>  | <b>ATTATATTGC</b> | <b>ATATTCAAAT</b> | <b>TTAATAATTA</b> |
| cDNASolyc10g044510  | .....               | .....              | .....             | .....             | .....             |
| SIMLO13_LEAF        | .....               | .....              | .....             | .....             | .....             |
| SIMLO13_ROOT        | .....               | .....              | .....             | .....             | .....             |
| SIMLO13_FLOWER      | .....               | .....              | .....             | .....             | .....             |
| SIMLO13_FRUIT       | .....               | .....              | .....             | .....             | .....             |
|                     | 960                 |                    | 980               |                   | 1,000             |
| gDNA_Solyc10g044510 | <b>ACAAAGTGTT</b>   | <b>CGTATGTTCA</b>  | <b>AATCTCACTA</b> | <b>GTAGCAACTC</b> | <b>TTTTTTATCA</b> |
| cDNASolyc10g044510  | .....               | .....              | .....             | .....             | .....             |
| SIMLO13_LEAF        | .....               | .....              | .....             | .....             | .....             |
| SIMLO13_ROOT        | .....               | .....              | .....             | .....             | .....             |
| SIMLO13_FLOWER      | .....               | .....              | .....             | .....             | .....             |
| SIMLO13_FRUIT       | .....               | .....              | .....             | .....             | .....             |
|                     | 1,020               |                    | 1,040             |                   |                   |
| gDNA_Solyc10g044510 | <b>CTTTTTAAGA</b>   | <b>AGAACAGACT</b>  | <b>CACTTCAGCA</b> | <b>CAGCACCTGG</b> | <b>ACACTCTTCG</b> |
| cDNASolyc10g044510  | .....               | .....              | .....             | .....             | .....             |
| SIMLO13_LEAF        | .....               | .....              | .....             | .....             | .....             |
| SIMLO13_ROOT        | .....               | .....              | .....             | .....             | .....             |
| SIMLO13_FLOWER      | .....               | .....              | .....             | .....             | .....             |
| SIMLO13_FRUIT       | .....               | .....              | .....             | .....             | .....             |
|                     | 1,060               |                    | 1,080             |                   | 1,100             |
| gDNA_Solyc10g044510 | <b>TGAAATTTCT</b>   | <b>CGCGCCACTA</b>  | <b>CATGTGCATG</b> | <b>TTCTAAGGAT</b> | <b>TTACTTACTA</b> |
| cDNASolyc10g044510  | .....               | .....              | .....             | .....             | .....             |
| SIMLO13_LEAF        | .....               | .....              | .....             | .....             | .....             |
| SIMLO13_ROOT        | .....               | .....              | .....             | .....             | .....             |
| SIMLO13_FLOWER      | .....               | .....              | .....             | .....             | .....             |
| SIMLO13_FRUIT       | .....               | .....              | .....             | .....             | .....             |
|                     | 1,120               |                    | 1,140             |                   |                   |
| gDNA_Solyc10g044510 | <b>TATCAGATTG</b>   | <b>TAGTATTCC T</b> | <b>TGTTTGTGGT</b> | <b>TTTAAATGAA</b> | <b>TTTGATTGTA</b> |
| cDNASolyc10g044510  | .....               | .....              | .....             | .....             | .....A            |
| SIMLO13_LEAF        | .....               | .....              | .....             | .....             | .....A            |
| SIMLO13_ROOT        | .....               | .....              | .....             | .....             | .....A            |
| SIMLO13_FLOWER      | .....               | .....              | .....             | .....             | .....A            |
| SIMLO13_FRUIT       | .....               | .....              | .....             | .....             | .....A            |
|                     | 1,160               |                    | 1,180             |                   | 1,200             |
| gDNA_Solyc10g044510 | <b>GATATACAGT</b>   | <b>TGGAGGAAGT</b>  | <b>GGGAAAACCA</b> | <b>AGTGAGCTCT</b> | <b>GGGGAACAGA</b> |
| cDNASolyc10g044510  | --TATACAGT          | TGGAGGAAGT         | GGGAAAACCA        | AGTGAGCTCT        | GGGGAACAGA        |
| SIMLO13_LEAF        | <b>GATATACAGT</b>   | TGGAGGAAGT         | GGGAAAACCA        | AGTGAGCTCT        | GGGGAACAGA        |
| SIMLO13_ROOT        | --TATACAGT          | TGGAGGAAGT         | GGGAAAACCA        | AGTGAGCTCT        | GGGGAACAGA        |
| SIMLO13_FLOWER      | --TATACAGT          | TGGAGGAAGT         | GGGAAAACCA        | AGTGAGCTCT        | GGGGAACAGA        |
| SIMLO13_FRUIT       | --TATACAGT          | TGGAGGAAGT         | GGGAAAACCA        | AGTGAGCTCT        | GGGGAACAGA        |

|                     |                    |                    |                   |                    |                    |      |
|---------------------|--------------------|--------------------|-------------------|--------------------|--------------------|------|
|                     |                    |                    | 1,220             |                    | 1,240              |      |
| gDNA_Solyc10g044510 | <b>ACAAC TTACA</b> | <b>AGGTGTG TG</b>  | <b>AATTAATAAT</b> | <b>TATTAAC TAT</b> | <b>GTCCTATCAA</b>  | 1250 |
| cDNASolyc10g044510  | <b>ACAAC TTACA</b> | <b>AG</b>          | -----             | -----              | -----              | 595  |
| SIMLO13_LEAF        | <b>ACAAC TTACA</b> | <b>AG</b>          | -----             | -----              | -----              | 602  |
| SIMLO13_ROOT        | <b>ACAAC TTACA</b> | <b>AG</b>          | -----             | -----              | -----              | 595  |
| SIMLO13_FLOWER      | <b>ACAAC TTACA</b> | <b>AG</b>          | -----             | -----              | -----              | 595  |
| SIMLO13_FRUIT       | <b>ACAAC TTACA</b> | <b>AG</b>          | -----             | -----              | -----              | 595  |
|                     | 1,260              |                    | 1,280             |                    | 1,300              |      |
| gDNA_Solyc10g044510 | <b>TATAAAT TCA</b> | <b>CCTTCTTCCA</b>  | <b>TATAAGTAAT</b> | <b>AGTTGCATAA</b>  | <b>AATACAAAT T</b> | 1300 |
| cDNASolyc10g044510  | -----              | -----              | -----             | -----              | -----              | 595  |
| SIMLO13_LEAF        | -----              | -----              | -----             | -----              | -----              | 602  |
| SIMLO13_ROOT        | -----              | -----              | -----             | -----              | -----              | 595  |
| SIMLO13_FLOWER      | -----              | -----              | -----             | -----              | -----              | 595  |
| SIMLO13_FRUIT       | -----              | -----              | -----             | -----              | -----              | 595  |
|                     |                    | 1,320              |                   | 1,340              |                    |      |
| gDNA_Solyc10g044510 | <b>TAAGGAAACG</b>  | <b>TATCATAGAT</b>  | <b>TATTCAACAA</b> | <b>GTATGTAATA</b>  | <b>TTTTCTTAAA</b>  | 1350 |
| cDNASolyc10g044510  | -----              | -----              | -----             | -----              | -----              | 595  |
| SIMLO13_LEAF        | -----              | -----              | -----             | -----              | -----              | 602  |
| SIMLO13_ROOT        | -----              | -----              | -----             | -----              | -----              | 595  |
| SIMLO13_FLOWER      | -----              | -----              | -----             | -----              | -----              | 595  |
| SIMLO13_FRUIT       | -----              | -----              | -----             | -----              | -----              | 595  |
|                     | 1,360              |                    | 1,380             |                    | 1,400              |      |
| gDNA_Solyc10g044510 | <b>GATTA AAAAA</b> | <b>TGTGTTCTCA</b>  | <b>TCTTTTATCA</b> | <b>TAGAGCTGAG</b>  | <b>CTTCTAATA</b>   | 1400 |
| cDNASolyc10g044510  | -----              | -----              | -----             | -----              | -----              | 595  |
| SIMLO13_LEAF        | -----              | -----              | -----             | -----              | -----              | 602  |
| SIMLO13_ROOT        | -----              | -----              | -----             | -----              | -----              | 595  |
| SIMLO13_FLOWER      | -----              | -----              | -----             | -----              | -----              | 595  |
| SIMLO13_FRUIT       | -----              | -----              | -----             | -----              | -----              | 595  |
|                     |                    | 1,420              |                   | 1,440              |                    |      |
| gDNA_Solyc10g044510 | <b>TCCCTTTCTA</b>  | <b>TTGTTTTATT</b>  | <b>TAGTGCCAAA</b> | <b>GAATAAGGAG</b>  | <b>ATGAGACGAC</b>  | 1450 |
| cDNASolyc10g044510  | -----              | -----              | ---TGCCAAA        | <b>GAATAAGGAG</b>  | <b>ATGAGACGAC</b>  | 622  |
| SIMLO13_LEAF        | -----              | -----              | ---AGC---         | -----              | -----              | 605  |
| SIMLO13_ROOT        | -----              | -----              | ---TGCCAAA        | <b>GAATAAGGAG</b>  | <b>ATGAGACGAC</b>  | 622  |
| SIMLO13_FLOWER      | -----              | -----              | ---TGCCAAA        | <b>GAATAAGGAG</b>  | <b>ATGAGACGAC</b>  | 622  |
| SIMLO13_FRUIT       | -----              | -----              | ---TGCCAAA        | <b>GAATAAGGAG</b>  | <b>ATGAGACGAC</b>  | 622  |
|                     | 1,460              |                    | 1,480             |                    | 1,500              |      |
| gDNA_Solyc10g044510 | <b>AGTCCACC TT</b> | <b>TGCCCTG CAT</b> | <b>CATGCTTCCC</b> | <b>ATCCATGGAG</b>  | <b>TAGGAGTCGG</b>  | 1500 |
| cDNASolyc10g044510  | <b>AGTCCACC TT</b> | <b>TGCCCTG CAT</b> | <b>CATGCTTCCC</b> | <b>ATCCATGGAG</b>  | <b>TAGGAGTCGG</b>  | 672  |
| SIMLO13_LEAF        | -----              | -----              | -----             | -----              | -----              | 605  |
| SIMLO13_ROOT        | <b>AGTCCACC TT</b> | <b>TGCCCTG CAT</b> | <b>CATGCTTCCC</b> | <b>ATCCATGGAG</b>  | <b>TAGGAGTCGG</b>  | 672  |
| SIMLO13_FLOWER      | <b>AGTCCACC TT</b> | <b>TGCCCTG CAT</b> | <b>CATGCTTCCC</b> | <b>ATCCATGGAG</b>  | <b>TAGGAGTCGG</b>  | 672  |
| SIMLO13_FRUIT       | <b>AGTCCACC TT</b> | <b>TGCCCTG CAT</b> | <b>CATGCTTCCC</b> | <b>ATCCATGGAG</b>  | <b>TAGGAGTCGG</b>  | 672  |
|                     |                    | 1,520              |                   | 1,540              |                    |      |
| gDNA_Solyc10g044510 | <b>ATTCTTATAT</b>  | <b>GGATGGTAAT</b>  | <b>AGTTATTGCC</b> | <b>TTAATCTAAC</b>  | <b>AACATCATAC</b>  | 1550 |
| cDNASolyc10g044510  | <b>ATTCTTATAT</b>  | <b>GGATG</b>       | -----             | -----              | -----              | 687  |
| SIMLO13_LEAF        | -----              | -----              | -----             | -----              | -----              | 605  |
| SIMLO13_ROOT        | <b>ATTCTTATAT</b>  | <b>GGATG</b>       | -----             | -----              | -----              | 687  |
| SIMLO13_FLOWER      | <b>ATTCTTATAT</b>  | <b>GGATG</b>       | -----             | -----              | -----              | 687  |
| SIMLO13_FRUIT       | <b>ATTCTTATAT</b>  | <b>GGATG</b>       | -----             | -----              | -----              | 687  |
|                     | 1,560              |                    | 1,580             |                    | 1,600              |      |
| gDNA_Solyc10g044510 | <b>ACTTCTCTAT</b>  | <b>AAATTAGGAT</b>  | <b>GCATTCAAGT</b> | <b>AATTTTTATG</b>  | <b>TATCATGGAT</b>  | 1600 |
| cDNASolyc10g044510  | -----              | -----              | -----             | -----              | -----              | 687  |
| SIMLO13_LEAF        | -----              | -----              | -----             | -----              | -----              | 605  |
| SIMLO13_ROOT        | -----              | -----              | -----             | -----              | -----              | 687  |
| SIMLO13_FLOWER      | -----              | -----              | -----             | -----              | -----              | 687  |
| SIMLO13_FRUIT       | -----              | -----              | -----             | -----              | -----              | 687  |
|                     |                    | 1,620              |                   | 1,640              |                    |      |
| gDNA_Solyc10g044510 | <b>ATTTATTCCA</b>  | <b>TAGTCGTCTC</b>  | <b>CTGAGATTAT</b> | <b>GTAATAGGAA</b>  | <b>AATTTTTCCA</b>  | 1650 |
| cDNASolyc10g044510  | -----              | -----              | -----             | -----              | -----              | 687  |
| SIMLO13_LEAF        | -----              | -----              | -----             | -----              | -----              | 605  |
| SIMLO13_ROOT        | -----              | -----              | -----             | -----              | -----              | 687  |
| SIMLO13_FLOWER      | -----              | -----              | -----             | -----              | -----              | 687  |
| SIMLO13_FRUIT       | -----              | -----              | -----             | -----              | -----              | 687  |
|                     | 1,660              |                    | 1,680             |                    | 1,700              |      |
| gDNA_Solyc10g044510 | <b>TCTAACTTGG</b>  | <b>TGTTAAAAAC</b>  | <b>CAAACACTTC</b> | <b>TTTAAAAATT</b>  | <b>TGGACTTTAG</b>  | 1700 |
| cDNASolyc10g044510  | -----              | -----              | -----             | -----              | -----              | 687  |
| SIMLO13_LEAF        | -----              | -----              | -----             | -----              | -----              | 605  |
| SIMLO13_ROOT        | -----              | -----              | -----             | -----              | -----              | 687  |
| SIMLO13_FLOWER      | -----              | -----              | -----             | -----              | -----              | 687  |
| SIMLO13_FRUIT       | -----              | -----              | -----             | -----              | -----              | 687  |
|                     |                    | 1,720              |                   | 1,740              |                    |      |
| gDNA_Solyc10g044510 | <b>ACCTTTGTGG</b>  | <b>AAGAACTAGT</b>  | <b>ACCGATTACT</b> | <b>CCTACAAGGA</b>  | <b>ACCAACTTCC</b>  | 1750 |
| cDNASolyc10g044510  | -----              | -----              | -----             | -----              | -----              | 687  |
| SIMLO13_LEAF        | -----              | -----              | -----             | -----              | -----              | 605  |
| SIMLO13_ROOT        | -----              | -----              | -----             | -----              | -----              | 687  |
| SIMLO13_FLOWER      | -----              | -----              | -----             | -----              | -----              | 687  |
| SIMLO13_FRUIT       | -----              | -----              | -----             | -----              | -----              | 687  |
|                     | 1,760              |                    | 1,780             |                    | 1,800              |      |
| gDNA_Solyc10g044510 | <b>TTAGACGGGA</b>  | <b>ACAAGAAAGT</b>  | <b>AGTATAGGAA</b> | <b>CACAAGTTTT</b>  | <b>ACCATGGAAA</b>  | 1800 |
| cDNASolyc10g044510  | -----              | -----              | -----             | -----              | -----              | 687  |
| SIMLO13_LEAF        | -----              | -----              | -----             | -----              | -----              | 605  |
| SIMLO13_ROOT        | -----              | -----              | -----             | -----              | -----              | 687  |
| SIMLO13_FLOWER      | -----              | -----              | -----             | -----              | -----              | 687  |
| SIMLO13_FRUIT       | -----              | -----              | -----             | -----              | -----              | 687  |

|                     |                   |                   |                    |                   |                   |      |
|---------------------|-------------------|-------------------|--------------------|-------------------|-------------------|------|
|                     |                   | 1,820             |                    | 1,840             |                   |      |
| gDNA_Solyc10g044510 | <b>ACCTCCTTGC</b> | <b>TCAAGGAGTA</b> | <b>AAAAGCTACA</b>  | <b>GTGAGTAGGA</b> | <b>TTTTAAGAAC</b> | 1850 |
| cDNASolyc10g044510  | -----             | -----             | -----              | -----             | -----             | 687  |
| SIMLO13_LEAF        | -----             | -----             | -----              | -----             | -----             | 605  |
| SIMLO13_ROOT        | -----             | -----             | -----              | -----             | -----             | 687  |
| SIMLO13_FLOWER      | -----             | -----             | -----              | -----             | -----             | 687  |
| SIMLO13_FRUIT       | -----             | -----             | -----              | -----             | -----             | 687  |
|                     | 1,860             |                   | 1,880              |                   | 1,900             |      |
| gDNA_Solyc10g044510 | <b>CAATCTTCAC</b> | <b>TAACCTCAAA</b> | <b>GAATAGTGTC</b>  | <b>AGATTACATC</b> | <b>TCTATAATCT</b> | 1900 |
| cDNASolyc10g044510  | -----             | -----             | -----              | -----             | -----             | 687  |
| SIMLO13_LEAF        | -----             | -----             | -----              | -----             | -----             | 605  |
| SIMLO13_ROOT        | -----             | -----             | -----              | -----             | -----             | 687  |
| SIMLO13_FLOWER      | -----             | -----             | -----              | -----             | -----             | 687  |
| SIMLO13_FRUIT       | -----             | -----             | -----              | -----             | -----             | 687  |
|                     |                   | 1,920             |                    | 1,940             |                   |      |
| gDNA_Solyc10g044510 | <b>AAGGTACTAA</b> | <b>ATCTAGTATC</b> | <b>TGTACTCAAC</b>  | <b>AGTTAACTCT</b> | <b>AACTGCTCTA</b> | 1950 |
| cDNASolyc10g044510  | -----             | -----             | -----              | -----             | -----             | 687  |
| SIMLO13_LEAF        | -----             | -----             | -----              | -----             | -----             | 605  |
| SIMLO13_ROOT        | -----             | -----             | -----              | -----             | -----             | 687  |
| SIMLO13_FLOWER      | -----             | -----             | -----              | -----             | -----             | 687  |
| SIMLO13_FRUIT       | -----             | -----             | -----              | -----             | -----             | 687  |
|                     | 1,960             |                   | 1,980              |                   | 2,000             |      |
| gDNA_Solyc10g044510 | <b>GTCTCTTCTT</b> | <b>GTTACAAACC</b> | <b>TCACAACAT</b>   | <b>CACAGATAAA</b> | <b>CCAAACAAGA</b> | 2000 |
| cDNASolyc10g044510  | -----             | -----             | -----              | -----             | -----             | 687  |
| SIMLO13_LEAF        | -----             | -----             | -----              | -----             | -----             | 605  |
| SIMLO13_ROOT        | -----             | -----             | -----              | -----             | -----             | 687  |
| SIMLO13_FLOWER      | -----             | -----             | -----              | -----             | -----             | 687  |
| SIMLO13_FRUIT       | -----             | -----             | -----              | -----             | -----             | 687  |
|                     |                   | 2,020             |                    | 2,040             |                   |      |
| gDNA_Solyc10g044510 | <b>AATTATTACA</b> | <b>ACTCAATAAT</b> | <b>ATTCATGAAA</b>  | <b>CAACTTCAAC</b> | <b>TAAGAAAGCA</b> | 2050 |
| cDNASolyc10g044510  | -----             | -----             | -----              | -----             | -----             | 687  |
| SIMLO13_LEAF        | -----             | -----             | -----              | -----             | -----             | 605  |
| SIMLO13_ROOT        | -----             | -----             | -----              | -----             | -----             | 687  |
| SIMLO13_FLOWER      | -----             | -----             | -----              | -----             | -----             | 687  |
| SIMLO13_FRUIT       | -----             | -----             | -----              | -----             | -----             | 687  |
|                     | 2,060             |                   | 2,080              |                   | 2,100             |      |
| gDNA_Solyc10g044510 | <b>TGAACACACC</b> | <b>CTAAACACTA</b> | <b>TTCTTCTTTC</b>  | <b>TTCCTTGTTT</b> | <b>CTCTGCTTGG</b> | 2100 |
| cDNASolyc10g044510  | -----             | -----             | -----              | -----             | -----             | 687  |
| SIMLO13_LEAF        | -----             | -----             | -----              | -----             | -----             | 605  |
| SIMLO13_ROOT        | -----             | -----             | -----              | -----             | -----             | 687  |
| SIMLO13_FLOWER      | -----             | -----             | -----              | -----             | -----             | 687  |
| SIMLO13_FRUIT       | -----             | -----             | -----              | -----             | -----             | 687  |
|                     |                   | 2,120             |                    | 2,140             |                   |      |
| gDNA_Solyc10g044510 | <b>ATGCAATGTA</b> | <b>ATAGACTTTG</b> | <b>TTGGAATACA</b>  | <b>TTTTCTGCTT</b> | <b>GTGCAATAGC</b> | 2150 |
| cDNASolyc10g044510  | -----             | -----             | -----              | -----             | -----             | 687  |
| SIMLO13_LEAF        | -----             | -----             | -----              | -----             | -----             | 605  |
| SIMLO13_ROOT        | -----             | -----             | -----              | -----             | -----             | 687  |
| SIMLO13_FLOWER      | -----             | -----             | -----              | -----             | -----             | 687  |
| SIMLO13_FRUIT       | -----             | -----             | -----              | -----             | -----             | 687  |
|                     | 2,160             |                   | 2,180              |                   | 2,200             |      |
| gDNA_Solyc10g044510 | <b>TGTCTTCGAT</b> | <b>GAGCCTAAAA</b> | <b>TTTTGCCTTA</b>  | <b>TATAGTTAGG</b> | <b>ACACCTTGTG</b> | 2200 |
| cDNASolyc10g044510  | -----             | -----             | -----              | -----             | -----             | 687  |
| SIMLO13_LEAF        | -----             | -----             | -----              | -----             | -----             | 605  |
| SIMLO13_ROOT        | -----             | -----             | -----              | -----             | -----             | 687  |
| SIMLO13_FLOWER      | -----             | -----             | -----              | -----             | -----             | 687  |
| SIMLO13_FRUIT       | -----             | -----             | -----              | -----             | -----             | 687  |
|                     |                   | 2,220             |                    | 2,240             |                   |      |
| gDNA_Solyc10g044510 | <b>CTGTGCAACA</b> | <b>ACCCTGATTG</b> | <b>ACTCAGTGCA</b>  | <b>AAACTATGGT</b> | <b>TACACAATTC</b> | 2250 |
| cDNASolyc10g044510  | -----             | -----             | -----              | -----             | -----             | 687  |
| SIMLO13_LEAF        | -----             | -----             | -----              | -----             | -----             | 605  |
| SIMLO13_ROOT        | -----             | -----             | -----              | -----             | -----             | 687  |
| SIMLO13_FLOWER      | -----             | -----             | -----              | -----             | -----             | 687  |
| SIMLO13_FRUIT       | -----             | -----             | -----              | -----             | -----             | 687  |
|                     | 2,260             |                   | 2,280              |                   | 2,300             |      |
| gDNA_Solyc10g044510 | <b>AATAATATTT</b> | <b>TTCTCCTTTA</b> | <b>TTTTCTCACAG</b> | <b>TTCTTAACTA</b> | <b>GAGGCAAAAT</b> | 2300 |
| cDNASolyc10g044510  | -----             | -----             | -----              | -----             | -----             | 687  |
| SIMLO13_LEAF        | -----             | -----             | -----              | -----             | -----             | 605  |
| SIMLO13_ROOT        | -----             | -----             | -----              | -----             | -----             | 687  |
| SIMLO13_FLOWER      | -----             | -----             | -----              | -----             | -----             | 687  |
| SIMLO13_FRUIT       | -----             | -----             | -----              | -----             | -----             | 687  |
|                     |                   | 2,320             |                    | 2,340             |                   |      |
| gDNA_Solyc10g044510 | <b>GTATGATTAT</b> | <b>GTATAGGTTA</b> | <b>TCTATGTGTC</b>  | <b>TTTTACTGAA</b> | <b>CGGACTGAAA</b> | 2350 |
| cDNASolyc10g044510  | -----             | -----             | -----              | -----             | -----             | 687  |
| SIMLO13_LEAF        | -----             | -----             | -----              | -----             | -----             | 605  |
| SIMLO13_ROOT        | -----             | -----             | -----              | -----             | -----             | 687  |
| SIMLO13_FLOWER      | -----             | -----             | -----              | -----             | -----             | 687  |
| SIMLO13_FRUIT       | -----             | -----             | -----              | -----             | -----             | 687  |
|                     | 2,360             |                   | 2,380              |                   | 2,400             |      |
| gDNA_Solyc10g044510 | <b>TGTTCTATAT</b> | <b>CTTCTGTCTT</b> | <b>TTTTAAATTG</b>  | <b>ATAAATTCAA</b> | <b>ACTATTAGGG</b> | 2400 |
| cDNASolyc10g044510  | -----             | -----             | -----              | -----             | -----             | 687  |
| SIMLO13_LEAF        | -----             | -----             | -----              | -----             | -----             | 605  |
| SIMLO13_ROOT        | -----             | -----             | -----              | -----             | -----             | 687  |
| SIMLO13_FLOWER      | -----             | -----             | -----              | -----             | -----             | 687  |
| SIMLO13_FRUIT       | -----             | -----             | -----              | -----             | -----             | 687  |

|                     |                              |                           |                   |                   |                   |
|---------------------|------------------------------|---------------------------|-------------------|-------------------|-------------------|
|                     |                              | 2,420                     |                   | 2,440             |                   |
| gDNA_Solyc10g044510 | <b>GTGTGTGGT</b>             | <b>AGAGTAATGT</b>         | <b>AAATACTCTA</b> | <b>GAATTAATAA</b> | <b>TCTAAATAGA</b> |
| cDNASolyc10g044510  | -----                        | -----                     | -----             | -----             | -----             |
| SIMLO13_LEAF        | -----                        | -----                     | -----             | -----             | -----             |
| SIMLO13_ROOT        | -----                        | -----                     | -----             | -----             | -----             |
| SIMLO13_FLOWER      | -----                        | -----                     | -----             | -----             | -----             |
| SIMLO13_FRUIT       | -----                        | -----                     | -----             | -----             | -----             |
|                     | 2,460                        |                           | 2,480             |                   | 2,500             |
| gDNA_Solyc10g044510 | <b>AATTAACAT</b>             | <b>TTGTGTAGAA</b>         | <b>ATTAGTTGTT</b> | <b>CCATTTATTT</b> | <b>AATCTGAGTT</b> |
| cDNASolyc10g044510  | -----                        | -----                     | -----             | -----             | -----             |
| SIMLO13_LEAF        | -----                        | -----                     | -----             | -----             | -----             |
| SIMLO13_ROOT        | -----                        | -----                     | -----             | -----             | -----             |
| SIMLO13_FLOWER      | -----                        | -----                     | -----             | -----             | -----             |
| SIMLO13_FRUIT       | -----                        | -----                     | -----             | -----             | -----             |
|                     |                              | 2,520                     |                   | 2,540             |                   |
| gDNA_Solyc10g044510 | <b>GCCAAGTTCT</b>            | <b>AAGTGAATGT</b>         | <b>ATCTTTTGT</b>  | <b>GTAACATAAT</b> | <b>CAATAACATG</b> |
| cDNASolyc10g044510  | -----                        | -----                     | -----             | -----             | -----             |
| SIMLO13_LEAF        | -----                        | -----                     | -----             | -----             | -----             |
| SIMLO13_ROOT        | -----                        | -----                     | -----             | -----             | -----             |
| SIMLO13_FLOWER      | -----                        | -----                     | -----             | -----             | -----             |
| SIMLO13_FRUIT       | -----                        | -----                     | -----             | -----             | -----             |
|                     | 2,560                        |                           | 2,580             |                   | 2,600             |
| gDNA_Solyc10g044510 | <b>CATAGCAAAT</b>            | <b>CGTAGCACCT</b>         | <b>TTGACCACAC</b> | <b>TTTTCAGCTT</b> | <b>TCCTTGCAAA</b> |
| cDNASolyc10g044510  | -----                        | -----                     | -----             | -----             | -----             |
| SIMLO13_LEAF        | -----                        | -----                     | -----             | -----             | -----             |
| SIMLO13_ROOT        | -----                        | -----                     | -----             | -----             | -----             |
| SIMLO13_FLOWER      | -----                        | -----                     | -----             | -----             | -----             |
| SIMLO13_FRUIT       | -----                        | -----                     | -----             | -----             | -----             |
|                     |                              | 2,620                     |                   | 2,640             |                   |
| gDNA_Solyc10g044510 | <b>TATGACGAAA</b>            | <b>TTCTATACA</b>          | <b>TTATTGTCTT</b> | <b>GAATTTTATC</b> | <b>TCAGCAATCA</b> |
| cDNASolyc10g044510  | -----                        | -----                     | -----             | -----             | -----             |
| SIMLO13_LEAF        | -----                        | -----                     | -----             | -----             | -----             |
| SIMLO13_ROOT        | -----                        | -----                     | -----             | -----             | -----             |
| SIMLO13_FLOWER      | -----                        | -----                     | -----             | -----             | -----             |
| SIMLO13_FRUIT       | -----                        | -----                     | -----             | -----             | -----             |
|                     | 2,660                        |                           | 2,680             |                   | 2,700             |
| gDNA_Solyc10g044510 | <b>TGTGTTTCTG</b>            | <b>CATTATCCAT</b>         | <b>GCATGGATAA</b> | <b>AATCCGTGAC</b> | <b>ATAGATTTGT</b> |
| cDNASolyc10g044510  | -----                        | -----                     | -----             | -----             | -----             |
| SIMLO13_LEAF        | -----                        | -----                     | -----             | -----             | -----             |
| SIMLO13_ROOT        | -----                        | -----                     | -----             | -----             | -----             |
| SIMLO13_FLOWER      | -----                        | -----                     | -----             | -----             | -----             |
| SIMLO13_FRUIT       | -----                        | -----                     | -----             | -----             | -----             |
|                     |                              | 2,720                     |                   | 2,740             |                   |
| gDNA_Solyc10g044510 | <b>TTTGTAACTCT</b>           | <b>TGCAGCTTTG</b>         | <b>CTTCTTAGG</b>  | <b>CAGTTCAGGA</b> | <b>CTTCAATTCA</b> |
| cDNASolyc10g044510  | -----                        | -----                     | -----             | -----             | -----             |
| SIMLO13_LEAF        | -----                        | -----                     | -----             | -----             | -----             |
| SIMLO13_ROOT        | -----                        | -----                     | -----             | -----             | -----             |
| SIMLO13_FLOWER      | -----                        | -----                     | -----             | -----             | -----             |
| SIMLO13_FRUIT       | -----                        | -----                     | -----             | -----             | -----             |
|                     | 2,760                        |                           | 2,780             |                   | 2,800             |
| gDNA_Solyc10g044510 | <b>CAAGTCAGAT</b>            | <b>TACTTGGCAC</b>         | <b>TGAGATTGGG</b> | <b>GTTTATCACT</b> | <b>GTAGGTATTC</b> |
| cDNASolyc10g044510  | CAAG T CAGA TT AC TT GGCAC T | GAGA TT GGG GTTT AT CAC T | -----             | -----             | -----             |
| SIMLO13_LEAF        | CAAG T CAGA TT AC TT GGCAC T | GAGA TT GGG GTTT AT CAC T | -----             | -----             | -----             |
| SIMLO13_ROOT        | CAAG T CAGA TT AC TT GGCAC T | GAGA TT GGG GTTT AT CAC T | -----             | -----             | -----             |
| SIMLO13_FLOWER      | CAAG T CAGA TT AC TT GGCAC T | GAGA TT GGG GTTT AT CAC T | -----             | -----             | -----             |
| SIMLO13_FRUIT       | CAAG T CAGA TT AC TT GGCAC T | GAGA TT GGG GTTT AT CAC T | -----             | -----             | -----             |
|                     |                              | 2,820                     |                   | 2,840             |                   |
| gDNA_Solyc10g044510 | <b>AGTTTCTTTT</b>            | <b>GGAAC TTCAT</b>        | <b>TTATATTGTT</b> | <b>CCACTTAGAA</b> | <b>ATGATGTCTC</b> |
| cDNASolyc10g044510  | -----                        | -----                     | -----             | -----             | -----             |
| SIMLO13_LEAF        | -----                        | -----                     | -----             | -----             | -----             |
| SIMLO13_ROOT        | -----                        | -----                     | -----             | -----             | -----             |
| SIMLO13_FLOWER      | -----                        | -----                     | -----             | -----             | -----             |
| SIMLO13_FRUIT       | -----                        | -----                     | -----             | -----             | -----             |
|                     | 2,860                        |                           | 2,880             |                   | 2,900             |
| gDNA_Solyc10g044510 | <b>AACTCCTCTG</b>            | <b>TTAGTGTGGG</b>         | <b>AAAGTAAGGG</b> | <b>AAGCGGTGGA</b> | <b>AATGCTCAGT</b> |
| cDNASolyc10g044510  | -----                        | -----                     | -----             | -----             | -----             |
| SIMLO13_LEAF        | -----                        | -----                     | -----             | -----             | -----             |
| SIMLO13_ROOT        | -----                        | -----                     | -----             | -----             | -----             |
| SIMLO13_FLOWER      | -----                        | -----                     | -----             | -----             | -----             |
| SIMLO13_FRUIT       | -----                        | -----                     | -----             | -----             | -----             |
|                     |                              | 2,920                     |                   | 2,940             |                   |
| gDNA_Solyc10g044510 | <b>ATTCTTTTCC</b>            | <b>ACGGTTAAAA</b>         | <b>TTCGTATGCA</b> | <b>TCATTCTCGA</b> | <b>CATGCTTAAG</b> |
| cDNASolyc10g044510  | -----                        | -----                     | -----             | -----             | -----             |
| SIMLO13_LEAF        | -----                        | -----                     | -----             | -----             | -----             |
| SIMLO13_ROOT        | -----                        | -----                     | -----             | -----             | -----             |
| SIMLO13_FLOWER      | -----                        | -----                     | -----             | -----             | -----             |
| SIMLO13_FRUIT       | -----                        | -----                     | -----             | -----             | -----             |
|                     | 2,960                        |                           | 2,980             |                   | 3,000             |
| gDNA_Solyc10g044510 | <b>CAGTTGCATA</b>            | <b>TTTAATTGAA</b>         | <b>AGGTGTCCTA</b> | <b>TGAGGAATAC</b> | <b>ATTATACAAG</b> |
| cDNASolyc10g044510  | -----                        | -----                     | -----             | -----             | -----             |
| SIMLO13_LEAF        | -----                        | -----                     | -----             | -----             | -----             |
| SIMLO13_ROOT        | -----                        | -----                     | -----             | -----             | -----             |
| SIMLO13_FLOWER      | -----                        | -----                     | -----             | -----             | -----             |
| SIMLO13_FRUIT       | -----                        | -----                     | -----             | -----             | -----             |

|                     |                          |                          |                        |                                |                            |
|---------------------|--------------------------|--------------------------|------------------------|--------------------------------|----------------------------|
|                     |                          | 3,020                    |                        | 3,040                          |                            |
| gDNA_Solyc10g044510 | <b>AGGGAAGGAT</b>        | <b>ATTTTAAAGA</b>        | <b>TGTTGCTGTT</b>      | <b>AAGTTATAAT</b>              | <b>ATATATCTGA</b>          |
| cDNASolyc10g044510  | -----                    | -----                    | -----                  | -----                          | -----                      |
| SIMLO13_LEAF        | -----                    | -----                    | -----                  | -----                          | -----                      |
| SIMLO13_ROOT        | -----                    | -----                    | -----                  | -----                          | -----                      |
| SIMLO13_FLOWER      | -----                    | -----                    | -----                  | -----                          | -----                      |
| SIMLO13_FRUIT       | -----                    | -----                    | -----                  | -----                          | -----                      |
|                     | 3,060                    |                          | 3,080                  |                                | 3,100                      |
| gDNA_Solyc10g044510 | <b>ATGTAATTGC</b>        | <b>TGAAGCACTT</b>        | <b>AAGTTGAATG</b>      | <b>TTTTAATTCT</b>              | <b>GTTTAATTTG</b>          |
| cDNASolyc10g044510  | -----                    | -----                    | -----                  | -----                          | -----                      |
| SIMLO13_LEAF        | -----                    | -----                    | -----                  | -----                          | -----                      |
| SIMLO13_ROOT        | -----                    | -----                    | -----                  | -----                          | -----                      |
| SIMLO13_FLOWER      | -----                    | -----                    | -----                  | -----                          | -----                      |
| SIMLO13_FRUIT       | -----                    | -----                    | -----                  | -----                          | -----                      |
|                     |                          | 3,120                    |                        | 3,140                          |                            |
| gDNA_Solyc10g044510 | <b>TTCCCGAAAT</b>        | <b>TCAGTATCCT</b>        | <b>TGTAATAATT</b>      | <b>TTGTTGCTCG</b>              | <b>GAGGTATTTA</b>          |
| cDNASolyc10g044510  | -----                    | -----                    | -----                  | -----                          | -----                      |
| SIMLO13_LEAF        | -----                    | -----                    | -----                  | -----                          | -----                      |
| SIMLO13_ROOT        | -----                    | -----                    | -----                  | -----                          | -----                      |
| SIMLO13_FLOWER      | -----                    | -----                    | -----                  | -----                          | -----                      |
| SIMLO13_FRUIT       | -----                    | -----                    | -----                  | -----                          | -----                      |
|                     | 3,160                    |                          | 3,180                  |                                | 3,200                      |
| gDNA_Solyc10g044510 | <b>TAGAGTAGGG</b>        | <b>TGTTTTATT</b>         | <b>TGTTGTCAT</b>       | <b>ACTAAGTACT</b>              | <b>CCATTGCAAG</b>          |
| cDNASolyc10g044510  | -----                    | -----                    | -----                  | -----                          | -----                      |
| SIMLO13_LEAF        | -----                    | -----                    | -----                  | -----                          | -----                      |
| SIMLO13_ROOT        | -----                    | -----                    | -----                  | -----                          | -----                      |
| SIMLO13_FLOWER      | -----                    | -----                    | -----                  | -----                          | -----                      |
| SIMLO13_FRUIT       | -----                    | -----                    | -----                  | -----                          | -----                      |
|                     |                          | 3,220                    |                        | 3,240                          |                            |
| gDNA_Solyc10g044510 | <b>TAATGCCAGG</b>        | <b>GATAAGACTT</b>        | <b>AAGAGGACAT</b>      | <b>ATTTGTAGCT</b>              | <b>AATTTATTAC</b>          |
| cDNASolyc10g044510  | -----                    | -----                    | -----                  | -----                          | -----                      |
| SIMLO13_LEAF        | -----                    | -----                    | -----                  | -----                          | -----                      |
| SIMLO13_ROOT        | -----                    | -----                    | -----                  | -----                          | -----                      |
| SIMLO13_FLOWER      | -----                    | -----                    | -----                  | -----                          | -----                      |
| SIMLO13_FRUIT       | -----                    | -----                    | -----                  | -----                          | -----                      |
|                     | 3,260                    |                          | 3,280                  |                                | 3,300                      |
| gDNA_Solyc10g044510 | <b>TTGAACCAAA</b>        | <b>TCCAGAAGCA</b>        | <b>GTAAGTGTG</b>       | <b>TTCCAGAAAT</b>              | <b>TCACTTATTT</b>          |
| cDNASolyc10g044510  | -----                    | -----                    | -----                  | -----                          | -----                      |
| SIMLO13_LEAF        | -----                    | -----                    | -----                  | -----                          | -----                      |
| SIMLO13_ROOT        | -----                    | -----                    | -----                  | -----                          | -----                      |
| SIMLO13_FLOWER      | -----                    | -----                    | -----                  | -----                          | -----                      |
| SIMLO13_FRUIT       | -----                    | -----                    | -----                  | -----                          | -----                      |
|                     |                          | 3,320                    |                        | 3,340                          |                            |
| gDNA_Solyc10g044510 | <b>ATTTTCATTG</b>        | <b>TTTGACCGTT</b>        | <b>GCTTCAATAA</b>      | <b>CATGCAGAAAT</b>             | <b>CACAAGCTTC</b>          |
| cDNASolyc10g044510  | -----                    | -----                    | -----                  | -----                          | -----                      |
| SIMLO13_LEAF        | -----                    | -----                    | -----                  | -----                          | -----                      |
| SIMLO13_ROOT        | -----                    | -----                    | -----                  | -----                          | -----                      |
| SIMLO13_FLOWER      | -----                    | -----                    | -----                  | -----                          | -----                      |
| SIMLO13_FRUIT       | -----                    | -----                    | -----                  | -----                          | -----                      |
|                     | 3,360                    |                          | 3,380                  |                                | 3,400                      |
| gDNA_Solyc10g044510 | <b>CAC T T A C T T A</b> | <b>CAA T T T C C A C</b> | <b>A A G T A C A T</b> | <b>G G T T C G T A G C A T</b> | <b>G G A A G A T G A G</b> |
| cDNASolyc10g044510  | -----                    | -----                    | -----                  | -----                          | -----                      |
| SIMLO13_LEAF        | -----                    | -----                    | -----                  | -----                          | -----                      |
| SIMLO13_ROOT        | -----                    | -----                    | -----                  | -----                          | -----                      |
| SIMLO13_FLOWER      | -----                    | -----                    | -----                  | -----                          | -----                      |
| SIMLO13_FRUIT       | -----                    | -----                    | -----                  | -----                          | -----                      |
|                     |                          | 3,420                    |                        | 3,440                          |                            |
| gDNA_Solyc10g044510 | <b>TTTTATGAAA</b>        | <b>TTGTAGGCAT</b>        | <b>CAGGTATGTT</b>      | <b>GTTATTGGTT</b>              | <b>TAGATCATT</b>           |
| cDNASolyc10g044510  | -----                    | -----                    | -----                  | -----                          | -----                      |
| SIMLO13_LEAF        | -----                    | -----                    | -----                  | -----                          | -----                      |
| SIMLO13_ROOT        | -----                    | -----                    | -----                  | -----                          | -----                      |
| SIMLO13_FLOWER      | -----                    | -----                    | -----                  | -----                          | -----                      |
| SIMLO13_FRUIT       | -----                    | -----                    | -----                  | -----                          | -----                      |
|                     | 3,460                    |                          | 3,480                  |                                | 3,500                      |
| gDNA_Solyc10g044510 | <b>TAATTCACAG</b>        | <b>TATAGGGGTG</b>        | <b>AGAATATTTT</b>      | <b>TGTTCAGTAG</b>              | <b>TAATTATACT</b>          |
| cDNASolyc10g044510  | -----                    | -----                    | -----                  | -----                          | -----                      |
| SIMLO13_LEAF        | -----                    | -----                    | -----                  | -----                          | -----                      |
| SIMLO13_ROOT        | -----                    | -----                    | -----                  | -----                          | -----                      |
| SIMLO13_FLOWER      | -----                    | -----                    | -----                  | -----                          | -----                      |
| SIMLO13_FRUIT       | -----                    | -----                    | -----                  | -----                          | -----                      |
|                     |                          | 3,520                    |                        | 3,540                          |                            |
| gDNA_Solyc10g044510 | <b>TTCTGTTTGT</b>        | <b>GACATACCCA</b>        | <b>TCAATCAAAG</b>      | <b>ACTTGAGCTC</b>              | <b>CTCCTTGAGT</b>          |
| cDNASolyc10g044510  | -----                    | -----                    | -----                  | -----                          | -----                      |
| SIMLO13_LEAF        | -----                    | -----                    | -----                  | -----                          | -----                      |
| SIMLO13_ROOT        | -----                    | -----                    | -----                  | -----                          | -----                      |
| SIMLO13_FLOWER      | -----                    | -----                    | -----                  | -----                          | -----                      |
| SIMLO13_FRUIT       | -----                    | -----                    | -----                  | -----                          | -----                      |
|                     | 3,560                    |                          | 3,580                  |                                | 3,600                      |
| gDNA_Solyc10g044510 | <b>TTTTATTGGT</b>        | <b>GTTTATGATG</b>        | <b>AATGCTTCTT</b>      | <b>CTAGGTGCTT</b>              | <b>CCGCATAAAT</b>          |
| cDNASolyc10g044510  | -----                    | -----                    | -----                  | -----                          | -----                      |
| SIMLO13_LEAF        | -----                    | -----                    | -----                  | -----                          | -----                      |
| SIMLO13_ROOT        | -----                    | -----                    | -----                  | -----                          | -----                      |
| SIMLO13_FLOWER      | -----                    | -----                    | -----                  | -----                          | -----                      |
| SIMLO13_FRUIT       | -----                    | -----                    | -----                  | -----                          | -----                      |



|                     |                   |                    |                    |                    |                   |      |
|---------------------|-------------------|--------------------|--------------------|--------------------|-------------------|------|
|                     |                   |                    | 3,620              |                    | 3,640             |      |
| gDNA_Solyc10g044510 | <b>TTTGGTGAAA</b> | <b>ATACGTGAAA</b>  | <b>AGTTTGAAT</b>   | <b>ATGTTGGGT</b>   | <b>GTTTTTTTCG</b> | 3650 |
| cDNASolyc10g044510  | .....             | .....              | .....              | .....              | .....             | 847  |
| SIMLO13_LEAF        | .....             | .....              | .....              | .....              | .....             | 764  |
| SIMLO13_ROOT        | .....             | .....              | .....              | .....              | .....             | 847  |
| SIMLO13_FLOWER      | .....             | .....              | .....              | .....              | .....             | 847  |
| SIMLO13_FRUIT       | .....             | .....              | .....              | .....              | .....             | 847  |
|                     | 3,660             |                    | 3,680              |                    | 3,700             |      |
| gDNA_Solyc10g044510 | <b>GATCAAAATA</b> | <b>AAGCGTAGAG</b>  | <b>GAAAAAAGCTT</b> | <b>ATTTTATAG</b>   | <b>CTAATGAGCT</b> | 3700 |
| cDNASolyc10g044510  | .....             | .....              | .....              | .....              | .....             | 847  |
| SIMLO13_LEAF        | .....             | .....              | .....              | .....              | .....             | 764  |
| SIMLO13_ROOT        | .....             | .....              | .....              | .....              | .....             | 847  |
| SIMLO13_FLOWER      | .....             | .....              | .....              | .....              | .....             | 847  |
| SIMLO13_FRUIT       | .....             | .....              | .....              | .....              | .....             | 847  |
|                     |                   | 3,720              |                    | 3,740              |                   |      |
| gDNA_Solyc10g044510 | <b>GTAGTTCTAT</b> | <b>TACAAATTTGG</b> | <b>AAATTTGTCC</b>  | <b>AATTCITTTTC</b> | <b>TTAGTTTCTT</b> | 3750 |
| cDNASolyc10g044510  | .....             | .....              | .....              | .....              | .....             | 847  |
| SIMLO13_LEAF        | .....             | .....              | .....              | .....              | .....             | 764  |
| SIMLO13_ROOT        | .....             | .....              | .....              | .....              | .....             | 847  |
| SIMLO13_FLOWER      | .....             | .....              | .....              | .....              | .....             | 847  |
| SIMLO13_FRUIT       | .....             | .....              | .....              | .....              | .....             | 847  |
|                     | 3,760             |                    | 3,780              |                    | 3,800             |      |
| gDNA_Solyc10g044510 | <b>GTAGAAATAA</b> | <b>ATGTCTTGAT</b>  | <b>AGTTGTTTAT</b>  | <b>TTGTGCTGAC</b>  | <b>TTATGCTGGG</b> | 3800 |
| cDNASolyc10g044510  | .....             | .....              | .....              | .....              | .....             | 847  |
| SIMLO13_LEAF        | .....             | .....              | .....              | .....              | .....             | 764  |
| SIMLO13_ROOT        | .....             | .....              | .....              | .....              | .....             | 847  |
| SIMLO13_FLOWER      | .....             | .....              | .....              | .....              | .....             | 847  |
| SIMLO13_FRUIT       | .....             | .....              | .....              | .....              | .....             | 847  |
|                     |                   | 3,820              |                    | 3,840              |                   |      |
| gDNA_Solyc10g044510 | <b>ACTTTGCAGC</b> | <b>TGGCTACTTT</b>  | <b>GGGGTTATGC</b>  | <b>CATCATATGC</b>  | <b>ATCTTCATCA</b> | 3850 |
| cDNASolyc10g044510  | ----GC---         | <b>TGGCTACTTT</b>  | <b>GGGGTTATGC</b>  | <b>CATCATATGC</b>  | <b>ATCTTCATCA</b> | 889  |
| SIMLO13_LEAF        | ----GCAGC         | <b>TGGCTACTTT</b>  | <b>GGGGTTATGC</b>  | <b>CATCATATGC</b>  | <b>ATCTTCATCA</b> | 809  |
| SIMLO13_ROOT        | ----GC---         | <b>TGGCTACTTT</b>  | <b>GGGGTTATGC</b>  | <b>CATCATATGC</b>  | <b>ATCTTCATCA</b> | 889  |
| SIMLO13_FLOWER      | ----GC---         | <b>TGGCTACTTT</b>  | <b>GGGGTTATGC</b>  | <b>CATCATATGC</b>  | <b>ATCTTCATCA</b> | 889  |
| SIMLO13_FRUIT       | ----GC---         | <b>TGGCTACTTT</b>  | <b>GGGGTTATGC</b>  | <b>CATCATATGC</b>  | <b>ATCTTCATCA</b> | 889  |
|                     | 3,860             |                    | 3,880              |                    | 3,900             |      |
| gDNA_Solyc10g044510 | <b>ACATACATGG</b> | <b>TAAATGAAATT</b> | <b>TTTGTAAACAT</b> | <b>GAAACATCAT</b>  | <b>TTTTTTTGGT</b> | 3900 |
| cDNASolyc10g044510  | <b>ACATACATGG</b> | T                  | .....              | .....              | .....             | 900  |
| SIMLO13_LEAF        | <b>ACATACATGG</b> | T                  | .....              | .....              | .....             | 820  |
| SIMLO13_ROOT        | <b>ACATACATGG</b> | T                  | .....              | .....              | .....             | 900  |
| SIMLO13_FLOWER      | <b>ACATACATGG</b> | T                  | .....              | .....              | .....             | 900  |
| SIMLO13_FRUIT       | <b>ACATACATGG</b> | T                  | .....              | .....              | .....             | 900  |
|                     |                   | 3,920              |                    | 3,940              |                   |      |
| gDNA_Solyc10g044510 | <b>TGTTAAAGTT</b> | <b>TTGAAATGAT</b>  | <b>GTTTCTTATA</b>  | <b>TTGCAGGTCT</b>  | <b>TAATATCTAC</b> | 3950 |
| cDNASolyc10g044510  | .....             | .....              | .....              | -----CT            | <b>TAATATCTAC</b> | 912  |
| SIMLO13_LEAF        | .....             | .....              | .....              | -----GGTCT         | <b>TAATATCTAC</b> | 835  |
| SIMLO13_ROOT        | .....             | .....              | .....              | -----CT            | <b>TAATATCTAC</b> | 912  |
| SIMLO13_FLOWER      | .....             | .....              | .....              | -----CT            | <b>TAATATCTAC</b> | 912  |
| SIMLO13_FRUIT       | .....             | .....              | .....              | -----CT            | <b>TAATATCTAC</b> | 912  |
|                     | 3,960             |                    | 3,980              |                    | 4,000             |      |
| gDNA_Solyc10g044510 | <b>TTCTGGCTCT</b> | <b>CTTTTATTCC</b>  | <b>TGCCATCGTA</b>  | <b>AGTCCGTTA</b>   | <b>CTTTCTTTTG</b> | 4000 |
| cDNASolyc10g044510  | <b>TTCTGGCTCT</b> | <b>CTTTTATTCC</b>  | <b>TGCCA TC</b>    | .....              | .....             | 939  |
| SIMLO13_LEAF        | <b>TTCTGGCTCT</b> | <b>CTTTTATTCC</b>  | <b>TGCCA TC</b>    | .....              | .....             | 862  |
| SIMLO13_ROOT        | <b>TTCTGGCTCT</b> | <b>CTTTTATTCC</b>  | <b>TGCCA TC</b>    | .....              | .....             | 939  |
| SIMLO13_FLOWER      | <b>TTCTGGCTCT</b> | <b>CTTTTATTCC</b>  | <b>TGCCA TC</b>    | .....              | .....             | 939  |
| SIMLO13_FRUIT       | <b>TTCTGGCTCT</b> | <b>CTTTTATTCC</b>  | <b>TGCCA TC</b>    | .....              | .....             | 939  |
|                     |                   | 4,020              |                    | 4,040              |                   |      |
| gDNA_Solyc10g044510 | <b>TCCATTACCT</b> | <b>GAGTGAAATG</b>  | <b>ATCTATGTAT</b>  | <b>CTGATGCTCA</b>  | <b>ACAATAACTT</b> | 4050 |
| cDNASolyc10g044510  | .....             | .....              | .....              | .....              | .....             | 939  |
| SIMLO13_LEAF        | .....             | .....              | .....              | .....              | .....             | 862  |
| SIMLO13_ROOT        | .....             | .....              | .....              | .....              | .....             | 939  |
| SIMLO13_FLOWER      | .....             | .....              | .....              | .....              | .....             | 939  |
| SIMLO13_FRUIT       | .....             | .....              | .....              | .....              | .....             | 939  |
|                     | 4,060             |                    | 4,080              |                    | 4,100             |      |
| gDNA_Solyc10g044510 | <b>GTGCCAAAGC</b> | <b>TTGTCGTGGT</b>  | <b>GGTTGGAACA</b>  | <b>AAACTACAGC</b>  | <b>ATGTAGTCTC</b> | 4100 |
| cDNASolyc10g044510  | -----C            | <b>TTGTCGTGGT</b>  | <b>GGTTGGAACA</b>  | <b>AAACTACAGC</b>  | <b>ATGTAGTCTC</b> | 980  |
| SIMLO13_LEAF        | -----C            | <b>TTGTCGTGGT</b>  | <b>GGTTGGAACA</b>  | <b>AAACTACAGC</b>  | <b>ATGTAGTCTC</b> | 903  |
| SIMLO13_ROOT        | -----C            | <b>TTGTCGTGGT</b>  | <b>GGTTGGAACA</b>  | <b>AAACTACAGC</b>  | <b>ATGTAGTCTC</b> | 980  |
| SIMLO13_FLOWER      | -----C            | <b>TTGTCGTGGT</b>  | <b>GGTTGGAACA</b>  | <b>AAACTACAGC</b>  | <b>ATGTAGTCTC</b> | 980  |
| SIMLO13_FRUIT       | -----C            | <b>TTGTCGTGGT</b>  | <b>GGTTGGAACA</b>  | <b>AAACTACAGC</b>  | <b>ATGTAGTCTC</b> | 980  |
|                     |                   | 4,120              |                    | 4,140              |                   |      |
| gDNA_Solyc10g044510 | <b>CTCGTTGGCA</b> | <b>CTTGAAATTG</b>  | <b>CAGAGCCGAA</b>  | <b>GGGTCCACTT</b>  | <b>ATTGGATTAC</b> | 4150 |
| cDNASolyc10g044510  | <b>CTCGTTGGCA</b> | <b>CTTGAAATTG</b>  | <b>CAGAGCCGAA</b>  | <b>GGGTCCACTT</b>  | <b>ATTGGATTAC</b> | 1030 |
| SIMLO13_LEAF        | <b>CTCGTTGGCA</b> | <b>CTTGAAATTG</b>  | <b>CAGAGCCGAA</b>  | <b>GGGTCCACTT</b>  | <b>ATTGGATTAC</b> | 953  |
| SIMLO13_ROOT        | <b>CTCGTTGGCA</b> | <b>CTTGAAATTG</b>  | <b>CAGAGCCGAA</b>  | <b>GGGTCCACTT</b>  | <b>ATTGGATTAC</b> | 1030 |
| SIMLO13_FLOWER      | <b>CTCGTTGGCA</b> | <b>CTTGAAATTG</b>  | <b>CAGAGCCGAA</b>  | <b>GGGTCCACTT</b>  | <b>ATTGGATTAC</b> | 1030 |
| SIMLO13_FRUIT       | <b>CTCGTTGGCA</b> | <b>CTTGAAATTG</b>  | <b>CAGAGCCGAA</b>  | <b>GGGTCCACTT</b>  | <b>ATTGGATTAC</b> | 1030 |
|                     | 4,160             |                    | 4,180              |                    | 4,200             |      |
| gDNA_Solyc10g044510 | <b>AAGTAAAGCC</b> | <b>ACGCGATGAA</b>  | <b>TTGTTTTGGT</b>  | <b>TTGGAAAACC</b>  | <b>GAAGTACTA</b>  | 4200 |
| cDNASolyc10g044510  | <b>AAGTAAAGCC</b> | <b>ACGCGATGAA</b>  | <b>TTGTTTTGGT</b>  | <b>TTGGAAAACC</b>  | <b>GAAGTACTA</b>  | 1080 |
| SIMLO13_LEAF        | <b>AAGTAAAGCC</b> | <b>ACGCGATGAA</b>  | <b>TTGTTTTGGT</b>  | <b>TTGGAAAACC</b>  | <b>GAAGTACTA</b>  | 1003 |
| SIMLO13_ROOT        | <b>AAGTAAAGCC</b> | <b>ACGCGATGAA</b>  | <b>TTGTTTTGGT</b>  | <b>TTGGAAAACC</b>  | <b>GAAGTACTA</b>  | 1080 |
| SIMLO13_FLOWER      | <b>AAGTAAAGCC</b> | <b>ACGCGATGAA</b>  | <b>TTGTTTTGGT</b>  | <b>TTGGAAAACC</b>  | <b>GAAGTACTA</b>  | 1080 |
| SIMLO13_FRUIT       | <b>AAGTAAAGCC</b> | <b>ACGCGATGAA</b>  | <b>TTGTTTTGGT</b>  | <b>TTGGAAAACC</b>  | <b>GAAGTACTA</b>  | 1080 |

|                     |                    |                    |                     |                    |                    |
|---------------------|--------------------|--------------------|---------------------|--------------------|--------------------|
|                     |                    | 4,220              |                     | 4,240              |                    |
| gDNA_Solyc10g044510 | <b>TTACGACTGA</b>  | <b>TACAGTTTAT</b>  | <b>ATCATTTCAG</b>   | <b>GTCAAATTC</b>   | <b>AAAAGCTCTG</b>  |
| cDNASolyc10g044510  | <b>TTACGACTGA</b>  | <b>TACAGTTTAT</b>  | <b>ATCA TTT CAG</b> | -----              | -----              |
| SIMLO13_LEAF        | <b>TTACGACTGA</b>  | <b>TACAGTTTAT</b>  | <b>ATCA TTT CAG</b> | -----              | -----              |
| SIMLO13_ROOT        | <b>TTACGACTGA</b>  | <b>TACAGTTTAT</b>  | <b>ATCA TTT CAG</b> | -----              | -----              |
| SIMLO13_FLOWER      | <b>TTACGACTGA</b>  | <b>TACAGTTTAT</b>  | <b>ATCA TTT CAG</b> | -----              | -----              |
| SIMLO13_FRUIT       | <b>TTACGACTGA</b>  | <b>TACAGTTTAT</b>  | <b>ATCA TTT CAG</b> | -----              | -----              |
|                     | 4,260              |                    | 4,280               |                    | 4,300              |
| gDNA_Solyc10g044510 | <b>ATGCTCAATT</b>  | <b>CATTGTTCAA</b>  | <b>TGTTCAATTC</b>   | <b>AAGCAAACA</b>   | <b>AGTGAAAAGA</b>  |
| cDNASolyc10g044510  | -----              | -----              | -----               | -----              | -----              |
| SIMLO13_LEAF        | -----              | -----              | -----               | -----              | -----              |
| SIMLO13_ROOT        | -----              | -----              | -----               | -----              | -----              |
| SIMLO13_FLOWER      | -----              | -----              | -----               | -----              | -----              |
| SIMLO13_FRUIT       | -----              | -----              | -----               | -----              | -----              |
|                     |                    | 4,320              |                     | 4,340              |                    |
| gDNA_Solyc10g044510 | <b>TAAAAGATA</b>   | <b>TGCATGGTTA</b>  | <b>AATGTCCTAA</b>   | <b>CATCGATATT</b>  | <b>TTTGTGTGCA</b>  |
| cDNASolyc10g044510  | -----              | -----              | -----               | -----              | -----              |
| SIMLO13_LEAF        | -----              | -----              | -----               | -----              | -----              |
| SIMLO13_ROOT        | -----              | -----              | -----               | -----              | -----              |
| SIMLO13_FLOWER      | -----              | -----              | -----               | -----              | -----              |
| SIMLO13_FRUIT       | -----              | -----              | -----               | -----              | -----              |
|                     | 4,360              |                    | 4,380               |                    | 4,400              |
| gDNA_Solyc10g044510 | <b>CAGAAATGCTT</b> | <b>TTGAAATGGC</b>  | <b>AACCTTTATC</b>   | <b>TGGTCCTTGG</b>  | <b>TGAGATTTCGT</b> |
| cDNASolyc10g044510  | <b>AA TGC TT</b>   | <b>TTGAAA TGGC</b> | <b>AACC TTTATC</b>  | <b>TGGTCC TTG-</b> | -----              |
| SIMLO13_LEAF        | <b>AA TGC TT</b>   | <b>TTGAAA TGGC</b> | <b>AACC TTTATC</b>  | <b>TGGTCC TTG-</b> | -----              |
| SIMLO13_ROOT        | <b>AA TGC TT</b>   | <b>TTGAAA TGGC</b> | <b>AACC TTTATC</b>  | <b>TGGTCC TTG-</b> | -----              |
| SIMLO13_FLOWER      | <b>AA TGC TT</b>   | <b>TTGAAA TGGC</b> | <b>AACC TTTATC</b>  | <b>TGGTCC TTG-</b> | -----              |
| SIMLO13_FRUIT       | <b>AA TGC TT</b>   | <b>TTGAAA TGGC</b> | <b>AACC TTTATC</b>  | <b>TGGTCC TTG-</b> | -----              |
|                     |                    | 4,420              |                     | 4,440              |                    |
| gDNA_Solyc10g044510 | <b>CGCCTTTCTT</b>  | <b>CTTTACTATA</b>  | <b>ATTCATGGAG</b>   | <b>CATCTTGTTT</b>  | <b>AATGATTACT</b>  |
| cDNASolyc10g044510  | -----              | -----              | -----               | -----              | -----              |
| SIMLO13_LEAF        | -----              | -----              | -----               | -----              | -----              |
| SIMLO13_ROOT        | -----              | -----              | -----               | -----              | -----              |
| SIMLO13_FLOWER      | -----              | -----              | -----               | -----              | -----              |
| SIMLO13_FRUIT       | -----              | -----              | -----               | -----              | -----              |
|                     | 4,460              |                    | 4,480               |                    | 4,500              |
| gDNA_Solyc10g044510 | <b>ACTTTTTCTC</b>  | <b>AAGTCAATAT</b>  | <b>GTAATAAAT</b>    | <b>TTCTCTTCTG</b>  | <b>GCTGAAAATG</b>  |
| cDNASolyc10g044510  | -----              | -----              | -----               | -----              | -----              |
| SIMLO13_LEAF        | -----              | -----              | -----               | -----              | -----              |
| SIMLO13_ROOT        | -----              | -----              | -----               | -----              | -----              |
| SIMLO13_FLOWER      | -----              | -----              | -----               | -----              | -----              |
| SIMLO13_FRUIT       | -----              | -----              | -----               | -----              | -----              |
|                     |                    | 4,520              |                     | 4,540              |                    |
| gDNA_Solyc10g044510 | <b>AATGAATGTG</b>  | <b>GAAGGAAATT</b>  | <b>GTTCTCCAAA</b>   | <b>ATGTCATTGC</b>  | <b>TAGGAAATTA</b>  |
| cDNASolyc10g044510  | -----              | -----              | -----               | -----              | -----              |
| SIMLO13_LEAF        | -----              | -----              | -----               | -----              | -----              |
| SIMLO13_ROOT        | -----              | -----              | -----               | -----              | -----              |
| SIMLO13_FLOWER      | -----              | -----              | -----               | -----              | -----              |
| SIMLO13_FRUIT       | -----              | -----              | -----               | -----              | -----              |
|                     | 4,560              |                    | 4,580               |                    | 4,600              |
| gDNA_Solyc10g044510 | <b>AGAGCGAGGG</b>  | <b>GGGTGAATTA</b>  | <b>AAATTCCATC</b>   | <b>CCTAGTCGAC</b>  | <b>TTTCTGTGG</b>   |
| cDNASolyc10g044510  | -----              | -----              | -----               | -----              | -----              |
| SIMLO13_LEAF        | -----              | -----              | -----               | -----              | -----              |
| SIMLO13_ROOT        | -----              | -----              | -----               | -----              | -----              |
| SIMLO13_FLOWER      | -----              | -----              | -----               | -----              | -----              |
| SIMLO13_FRUIT       | -----              | -----              | -----               | -----              | -----              |
|                     |                    | 4,620              |                     | 4,640              |                    |
| gDNA_Solyc10g044510 | <b>GTTAGTATAA</b>  | <b>CGGATAATAG</b>  | <b>ATAAATTTAA</b>   | <b>AGAGACAACA</b>  | <b>ACAAGAATAT</b>  |
| cDNASolyc10g044510  | -----              | -----              | -----               | -----              | -----              |
| SIMLO13_LEAF        | -----              | -----              | -----               | -----              | -----              |
| SIMLO13_ROOT        | -----              | -----              | -----               | -----              | -----              |
| SIMLO13_FLOWER      | -----              | -----              | -----               | -----              | -----              |
| SIMLO13_FRUIT       | -----              | -----              | -----               | -----              | -----              |
|                     | 4,660              |                    | 4,680               |                    | 4,700              |
| gDNA_Solyc10g044510 | <b>GACAAACTAC</b>  | <b>TCCTATGAAA</b>  | <b>GAGGATCTTT</b>   | <b>GGTCTAACTC</b>  | <b>AATCCTGCAA</b>  |
| cDNASolyc10g044510  | -----              | -----              | -----               | -----              | -----              |
| SIMLO13_LEAF        | -----              | -----              | -----               | -----              | -----              |
| SIMLO13_ROOT        | -----              | -----              | -----               | -----              | -----              |
| SIMLO13_FLOWER      | -----              | -----              | -----               | -----              | -----              |
| SIMLO13_FRUIT       | -----              | -----              | -----               | -----              | -----              |
|                     |                    | 4,720              |                     | 4,740              |                    |
| gDNA_Solyc10g044510 | <b>GATAATT CAT</b> | <b>GAAGTAAGGA</b>  | <b>CTCCTAAGAT</b>   | <b>CATATAATGA</b>  | <b>GACAACAACA</b>  |
| cDNASolyc10g044510  | -----              | -----              | -----               | -----              | -----              |
| SIMLO13_LEAF        | -----              | -----              | -----               | -----              | -----              |
| SIMLO13_ROOT        | -----              | -----              | -----               | -----              | -----              |
| SIMLO13_FLOWER      | -----              | -----              | -----               | -----              | -----              |
| SIMLO13_FRUIT       | -----              | -----              | -----               | -----              | -----              |
|                     | 4,760              |                    | 4,780               |                    | 4,800              |
| gDNA_Solyc10g044510 | <b>AAAGCTCAAC</b>  | <b>CTATAGCGGA</b>  | <b>GGGTTAGGCT</b>   | <b>CCTGGAGTAT</b>  | <b>GAACAATATG</b>  |
| cDNASolyc10g044510  | -----              | -----              | -----               | -----              | -----              |
| SIMLO13_LEAF        | -----              | -----              | -----               | -----              | -----              |
| SIMLO13_ROOT        | -----              | -----              | -----               | -----              | -----              |
| SIMLO13_FLOWER      | -----              | -----              | -----               | -----              | -----              |
| SIMLO13_FRUIT       | -----              | -----              | -----               | -----              | -----              |

|                     |                   |                    |                   |                   |                   |      |
|---------------------|-------------------|--------------------|-------------------|-------------------|-------------------|------|
|                     |                   |                    | 4,820             |                   | 4,840             |      |
| gDNA_Solyc10g044510 | <b>ACATGGGGG</b>  | <b>CCAACATTGG</b>  | <b>GTAATCAAG</b>  | <b>AATAGGAATG</b> | <b>AGTGCCGCTC</b> | 4850 |
| cDNASolyc10g044510  | -----             | -----              | -----             | -----             | -----             | 1146 |
| SIMLO13_LEAF        | -----             | -----              | -----             | -----             | -----             | 1069 |
| SIMLO13_ROOT        | -----             | -----              | -----             | -----             | -----             | 1146 |
| SIMLO13_FLOWER      | -----             | -----              | -----             | -----             | -----             | 1146 |
| SIMLO13_FRUIT       | -----             | -----              | -----             | -----             | -----             | 1146 |
|                     | 4,860             |                    | 4,880             |                   | 4,900             |      |
| gDNA_Solyc10g044510 | <b>TGAGTTCGAT</b> | <b>ACCATATTTAA</b> | <b>GATAGACGTT</b> | <b>GAGCCTAATT</b> | <b>TAATCCCAAA</b> | 4900 |
| cDNASolyc10g044510  | -----             | -----              | -----             | -----             | -----             | 1146 |
| SIMLO13_LEAF        | -----             | -----              | -----             | -----             | -----             | 1069 |
| SIMLO13_ROOT        | -----             | -----              | -----             | -----             | -----             | 1146 |
| SIMLO13_FLOWER      | -----             | -----              | -----             | -----             | -----             | 1146 |
| SIMLO13_FRUIT       | -----             | -----              | -----             | -----             | -----             | 1146 |
|                     |                   | 4,920              |                   | 4,940             |                   |      |
| gDNA_Solyc10g044510 | <b>AGCTAACAGA</b> | <b>TGAGGTGAGG</b>  | <b>ATCACGAAGA</b> | <b>TCATATGAGG</b> | <b>AACAACAATA</b> | 4950 |
| cDNASolyc10g044510  | -----             | -----              | -----             | -----             | -----             | 1146 |
| SIMLO13_LEAF        | -----             | -----              | -----             | -----             | -----             | 1069 |
| SIMLO13_ROOT        | -----             | -----              | -----             | -----             | -----             | 1146 |
| SIMLO13_FLOWER      | -----             | -----              | -----             | -----             | -----             | 1146 |
| SIMLO13_FRUIT       | -----             | -----              | -----             | -----             | -----             | 1146 |
|                     | 4,960             |                    | 4,980             |                   | 5,000             |      |
| gDNA_Solyc10g044510 | <b>CATCACTTCA</b> | <b>ACCAACAGCA</b>  | <b>GACACTTAAC</b> | <b>AAGTGCAATA</b> | <b>CAAGTGACCT</b> | 5000 |
| cDNASolyc10g044510  | -----             | -----              | -----             | -----             | -----             | 1146 |
| SIMLO13_LEAF        | -----             | -----              | -----             | -----             | -----             | 1069 |
| SIMLO13_ROOT        | -----             | -----              | -----             | -----             | -----             | 1146 |
| SIMLO13_FLOWER      | -----             | -----              | -----             | -----             | -----             | 1146 |
| SIMLO13_FRUIT       | -----             | -----              | -----             | -----             | -----             | 1146 |
|                     |                   | 5,020              |                   | 5,040             |                   |      |
| gDNA_Solyc10g044510 | <b>TTTGGAGAGC</b> | <b>TAGCTACTCG</b>  | <b>TTTTGGCTGT</b> | <b>TTTCATTCTC</b> | <b>AAACCATGTT</b> | 5050 |
| cDNASolyc10g044510  | -----             | -----              | -----             | -----             | -----             | 1146 |
| SIMLO13_LEAF        | -----             | -----              | -----             | -----             | -----             | 1069 |
| SIMLO13_ROOT        | -----             | -----              | -----             | -----             | -----             | 1146 |
| SIMLO13_FLOWER      | -----             | -----              | -----             | -----             | -----             | 1146 |
| SIMLO13_FRUIT       | -----             | -----              | -----             | -----             | -----             | 1146 |
|                     | 5,060             |                    | 5,080             |                   | 5,100             |      |
| gDNA_Solyc10g044510 | <b>GTTGGTATTG</b> | <b>CCTTAGAATT</b>  | <b>TCTTTTCTCT</b> | <b>GAAGATGCGG</b> | <b>TTTGTCTTTT</b> | 5100 |
| cDNASolyc10g044510  | -----             | -----              | -----             | -----             | -----             | 1146 |
| SIMLO13_LEAF        | -----             | -----              | -----             | -----             | -----             | 1069 |
| SIMLO13_ROOT        | -----             | -----              | -----             | -----             | -----             | 1146 |
| SIMLO13_FLOWER      | -----             | -----              | -----             | -----             | -----             | 1146 |
| SIMLO13_FRUIT       | -----             | -----              | -----             | -----             | -----             | 1146 |
|                     |                   | 5,120              |                   | 5,140             |                   |      |
| gDNA_Solyc10g044510 | <b>TGGATCATTG</b> | <b>ATTCACCTCA</b>  | <b>TATCAATATT</b> | <b>AATCCATTTG</b> | <b>TGCAGTGGGG</b> | 5150 |
| cDNASolyc10g044510  | -----             | -----              | -----             | -----             | <b>TGGGG</b>      | 1151 |
| SIMLO13_LEAF        | -----             | -----              | -----             | -----             | -----             | 1069 |
| SIMLO13_ROOT        | -----             | -----              | -----             | -----             | <b>TGGGG</b>      | 1151 |
| SIMLO13_FLOWER      | -----             | -----              | -----             | -----             | <b>TGGGG</b>      | 1151 |
| SIMLO13_FRUIT       | -----             | -----              | -----             | -----             | <b>TGGGG</b>      | 1151 |
|                     | 5,160             |                    | 5,180             |                   | 5,200             |      |
| gDNA_Solyc10g044510 | <b>ATTGAAGCAA</b> | <b>CGATCGTGCT</b>  | <b>TCATGAAGAA</b> | <b>CCATGCAATG</b> | <b>GTTATGATCA</b> | 5200 |
| cDNASolyc10g044510  | <b>ATTGAAGCAA</b> | <b>CGATCGTGCT</b>  | <b>TCATGAAGAA</b> | <b>CCATGCAATG</b> | <b>GTTATGATCA</b> | 1201 |
| SIMLO13_LEAF        | -----             | -----              | -----             | -----             | -----             | 1069 |
| SIMLO13_ROOT        | <b>ATTGAAGCAA</b> | <b>CGATCGTGCT</b>  | <b>TCATGAAGAA</b> | <b>CCATGCAATG</b> | <b>GTTATGATCA</b> | 1201 |
| SIMLO13_FLOWER      | <b>ATTGAAGCAA</b> | <b>CGATCGTGCT</b>  | <b>TCATGAAGAA</b> | <b>CCATGCAATG</b> | <b>GTTATGATCA</b> | 1201 |
| SIMLO13_FRUIT       | <b>ATTGAAGCAA</b> | <b>CGATCGTGCT</b>  | <b>TCATGAAGAA</b> | <b>CCATGCAATG</b> | <b>GTTATGATCA</b> | 1201 |
|                     |                   | 5,220              |                   | 5,240             |                   |      |
| gDNA_Solyc10g044510 | <b>GATTGATTTT</b> | <b>AGGGTATGTA</b>  | <b>TATTACGTCT</b> | <b>TGACCACCTA</b> | <b>CTCCATCCCC</b> | 5250 |
| cDNASolyc10g044510  | <b>GATTGATTTT</b> | <b>AGGG</b>        | -----             | -----             | -----             | 1215 |
| SIMLO13_LEAF        | -----             | <b>-GGG</b>        | -----             | -----             | -----             | 1072 |
| SIMLO13_ROOT        | <b>GATTGATTTT</b> | <b>AGGG</b>        | -----             | -----             | -----             | 1215 |
| SIMLO13_FLOWER      | <b>GATTGATTTT</b> | <b>AGGG</b>        | -----             | -----             | -----             | 1215 |
| SIMLO13_FRUIT       | <b>GATTGATTTT</b> | <b>AGGG</b>        | -----             | -----             | -----             | 1215 |
|                     | 5,260             |                    | 5,280             |                   | 5,300             |      |
| gDNA_Solyc10g044510 | <b>CTTGAATTTA</b> | <b>AAGTTGGTAT</b>  | <b>GCCAAAACCA</b> | <b>TGAAATCAAT</b> | <b>CCATATTAAG</b> | 5300 |
| cDNASolyc10g044510  | -----             | -----              | -----             | -----             | -----             | 1215 |
| SIMLO13_LEAF        | -----             | -----              | -----             | -----             | -----             | 1072 |
| SIMLO13_ROOT        | -----             | -----              | -----             | -----             | -----             | 1215 |
| SIMLO13_FLOWER      | -----             | -----              | -----             | -----             | -----             | 1215 |
| SIMLO13_FRUIT       | -----             | -----              | -----             | -----             | -----             | 1215 |
|                     |                   | 5,320              |                   | 5,340             |                   |      |
| gDNA_Solyc10g044510 | <b>TTGTTCCAGG</b> | <b>GAACTTCTCT</b>  | <b>TAAAAGAAAA</b> | <b>CACCCTCCTT</b> | <b>ATGCCCTTAA</b> | 5350 |
| cDNASolyc10g044510  | -----             | -----              | -----             | -----             | -----             | 1215 |
| SIMLO13_LEAF        | -----             | -----              | -----             | -----             | -----             | 1072 |
| SIMLO13_ROOT        | -----             | -----              | -----             | -----             | -----             | 1215 |
| SIMLO13_FLOWER      | -----             | -----              | -----             | -----             | -----             | 1215 |
| SIMLO13_FRUIT       | -----             | -----              | -----             | -----             | -----             | 1215 |
|                     | 5,360             |                    | 5,380             |                   | 5,400             |      |
| gDNA_Solyc10g044510 | <b>GTACGTCTCT</b> | <b>ATCCTTCATT</b>  | <b>ATGAAAGTAC</b> | <b>CATCATGAAA</b> | <b>TCACCTCCGC</b> | 5400 |
| cDNASolyc10g044510  | -----             | -----              | -----             | -----             | -----             | 1215 |
| SIMLO13_LEAF        | -----             | -----              | -----             | -----             | -----             | 1072 |
| SIMLO13_ROOT        | -----             | -----              | -----             | -----             | -----             | 1215 |
| SIMLO13_FLOWER      | -----             | -----              | -----             | -----             | -----             | 1215 |
| SIMLO13_FRUIT       | -----             | -----              | -----             | -----             | -----             | 1215 |

|                     |                    |                    |       |                   |                   |                   |
|---------------------|--------------------|--------------------|-------|-------------------|-------------------|-------------------|
|                     |                    |                    | 5,420 |                   | 5,440             |                   |
| gDNA_Solyc10g044510 | <b>ATTTACTATA</b>  | <b>GTCCAAGTTC</b>  |       | <b>TGAAGAACTT</b> | <b>TACTTTTACG</b> | <b>TCCACTTCTT</b> |
| cDNASolyc10g044510  | -----              | -----              |       | -----             | -----             | -----             |
| SIMLO13_LEAF        | -----              | -----              |       | -----             | -----             | -----             |
| SIMLO13_ROOT        | -----              | -----              |       | -----             | -----             | -----             |
| SIMLO13_FLOWER      | -----              | -----              |       | -----             | -----             | -----             |
| SIMLO13_FRUIT       | -----              | -----              |       | -----             | -----             | -----             |
|                     |                    |                    | 5,460 |                   | 5,480             |                   |
| gDNA_Solyc10g044510 | <b>GTTCAATTCTT</b> | <b>TCCTTTTTAC</b>  |       | <b>TTTGTITAGT</b> | <b>ATATTCCTAT</b> | <b>CAGATAGTGC</b> |
| cDNASolyc10g044510  | -----              | -----              |       | -----             | -----             | -----             |
| SIMLO13_LEAF        | -----              | -----              |       | -----             | -----             | -----             |
| SIMLO13_ROOT        | -----              | -----              |       | -----             | -----             | -----             |
| SIMLO13_FLOWER      | -----              | -----              |       | -----             | -----             | -----             |
| SIMLO13_FRUIT       | -----              | -----              |       | -----             | -----             | -----             |
|                     |                    |                    | 5,520 |                   | 5,540             |                   |
| gDNA_Solyc10g044510 | <b>TCCTGTAGTA</b>  | <b>ACCTATTTTA</b>  |       | <b>GGTCATCCCC</b> | <b>ATCTTAGCTC</b> | <b>CATTGTTACA</b> |
| cDNASolyc10g044510  | -----              | -----              |       | -----             | -----             | -----             |
| SIMLO13_LEAF        | -----              | -----              |       | -----             | -----             | -----             |
| SIMLO13_ROOT        | -----              | -----              |       | -----             | -----             | -----             |
| SIMLO13_FLOWER      | -----              | -----              |       | -----             | -----             | -----             |
| SIMLO13_FRUIT       | -----              | -----              |       | -----             | -----             | -----             |
|                     |                    |                    | 5,560 |                   | 5,580             |                   |
| gDNA_Solyc10g044510 | <b>TCTTCATTGA</b>  | <b>TCATGTAGTT</b>  |       | <b>CTCCTATAAG</b> | <b>ACTGAGCCTA</b> | <b>GTTATATGAG</b> |
| cDNASolyc10g044510  | -----              | -----              |       | -----             | -----             | -----             |
| SIMLO13_LEAF        | -----              | -----              |       | -----             | -----             | -----             |
| SIMLO13_ROOT        | -----              | -----              |       | -----             | -----             | -----             |
| SIMLO13_FLOWER      | -----              | -----              |       | -----             | -----             | -----             |
| SIMLO13_FRUIT       | -----              | -----              |       | -----             | -----             | -----             |
|                     |                    |                    | 5,620 |                   | 5,640             |                   |
| gDNA_Solyc10g044510 | <b>CTGTTTTCAC</b>  | <b>ATAGAACCCT</b>  |       | <b>CTAGTCTCAC</b> | <b>TTTTCCATCG</b> | <b>TTTCTTATGG</b> |
| cDNASolyc10g044510  | -----              | -----              |       | -----             | -----             | -----             |
| SIMLO13_LEAF        | -----              | -----              |       | -----             | -----             | -----             |
| SIMLO13_ROOT        | -----              | -----              |       | -----             | -----             | -----             |
| SIMLO13_FLOWER      | -----              | -----              |       | -----             | -----             | -----             |
| SIMLO13_FRUIT       | -----              | -----              |       | -----             | -----             | -----             |
|                     |                    |                    | 5,660 |                   | 5,680             |                   |
| gDNA_Solyc10g044510 | <b>GGTTAAACAT</b>  | <b>CAGTGCCTTT</b>  |       | <b>TACTTATCTT</b> | <b>AAACAATTGC</b> | <b>GGAAGTTCCT</b> |
| cDNASolyc10g044510  | -----              | -----              |       | -----             | -----             | -----             |
| SIMLO13_LEAF        | -----              | -----              |       | -----             | -----             | -----             |
| SIMLO13_ROOT        | -----              | -----              |       | -----             | -----             | -----             |
| SIMLO13_FLOWER      | -----              | -----              |       | -----             | -----             | -----             |
| SIMLO13_FRUIT       | -----              | -----              |       | -----             | -----             | -----             |
|                     |                    |                    | 5,720 |                   | 5,740             |                   |
| gDNA_Solyc10g044510 | <b>CTTAATATCA</b>  | <b>CTGTGTTATA</b>  |       | <b>GTTTAGTATA</b> | <b>AACACTGTAG</b> | <b>TGGGTCAAGT</b> |
| cDNASolyc10g044510  | -----              | -----              |       | -----             | -----             | -----             |
| SIMLO13_LEAF        | -----              | -----              |       | -----             | -----             | -----             |
| SIMLO13_ROOT        | -----              | -----              |       | -----             | -----             | -----             |
| SIMLO13_FLOWER      | -----              | -----              |       | -----             | -----             | -----             |
| SIMLO13_FRUIT       | -----              | -----              |       | -----             | -----             | -----             |
|                     |                    |                    | 5,760 |                   | 5,780             |                   |
| gDNA_Solyc10g044510 | <b>GACTCCCTTT</b>  | <b>GTTGCCAAGG</b>  |       | <b>TATCTCCTTC</b> | <b>ATTGTTTATC</b> | <b>AGTCTTGCTT</b> |
| cDNASolyc10g044510  | -----              | -----              |       | -----             | -----             | -----             |
| SIMLO13_LEAF        | -----              | -----              |       | -----             | -----             | -----             |
| SIMLO13_ROOT        | -----              | -----              |       | -----             | -----             | -----             |
| SIMLO13_FLOWER      | -----              | -----              |       | -----             | -----             | -----             |
| SIMLO13_FRUIT       | -----              | -----              |       | -----             | -----             | -----             |
|                     |                    |                    | 5,820 |                   | 5,840             |                   |
| gDNA_Solyc10g044510 | <b>TGAAGGTTGC</b>  | <b>CTTGCATTAT</b>  |       | <b>CTATTTGTTT</b> | <b>TCAGTCTCTT</b> | <b>TTCAACTACA</b> |
| cDNASolyc10g044510  | -----              | -----              |       | -----             | -----             | -----             |
| SIMLO13_LEAF        | -----              | -----              |       | -----             | -----             | -----             |
| SIMLO13_ROOT        | -----              | -----              |       | -----             | -----             | -----             |
| SIMLO13_FLOWER      | -----              | -----              |       | -----             | -----             | -----             |
| SIMLO13_FRUIT       | -----              | -----              |       | -----             | -----             | -----             |
|                     |                    |                    | 5,860 |                   | 5,880             |                   |
| gDNA_Solyc10g044510 | <b>TACTTATACC</b>  | <b>TCTAATTTTC</b>  |       | <b>TATAACTAAA</b> | <b>GCTTATCCAT</b> | <b>TGATCTTACA</b> |
| cDNASolyc10g044510  | -----              | -----              |       | -----             | -----             | -----             |
| SIMLO13_LEAF        | -----              | -----              |       | -----             | -----             | -----             |
| SIMLO13_ROOT        | -----              | -----              |       | -----             | -----             | -----             |
| SIMLO13_FLOWER      | -----              | -----              |       | -----             | -----             | -----             |
| SIMLO13_FRUIT       | -----              | -----              |       | -----             | -----             | -----             |
|                     |                    |                    | 5,920 |                   | 5,940             |                   |
| gDNA_Solyc10g044510 | <b>TTCTAGTATG</b>  | <b>TAAGTTCACC</b>  |       | <b>CCTCAATCTT</b> | <b>CTTTGATCAG</b> | <b>ATCTTATTCA</b> |
| cDNASolyc10g044510  | -----              | -----              |       | -----             | -----             | -----             |
| SIMLO13_LEAF        | -----              | -----              |       | -----             | -----             | -----             |
| SIMLO13_ROOT        | -----              | -----              |       | -----             | -----             | -----             |
| SIMLO13_FLOWER      | -----              | -----              |       | -----             | -----             | -----             |
| SIMLO13_FRUIT       | -----              | -----              |       | -----             | -----             | -----             |
|                     |                    |                    | 5,960 |                   | 5,980             |                   |
| gDNA_Solyc10g044510 | <b>ATGAAACTAG</b>  | <b>TTACACAGATA</b> |       | <b>ATGCATTAAC</b> | <b>GATCAGTTGT</b> | <b>TGACATTGAG</b> |
| cDNASolyc10g044510  | -----              | -----              |       | -----             | -----             | -----             |
| SIMLO13_LEAF        | -----              | -----              |       | -----             | -----             | -----             |
| SIMLO13_ROOT        | -----              | -----              |       | -----             | -----             | -----             |
| SIMLO13_FLOWER      | -----              | -----              |       | -----             | -----             | -----             |
| SIMLO13_FRUIT       | -----              | -----              |       | -----             | -----             | -----             |
|                     |                    |                    |       |                   | 6,000             |                   |

|                     |                    |                   |                    |                   |                          |      |
|---------------------|--------------------|-------------------|--------------------|-------------------|--------------------------|------|
|                     |                    |                   | 6,020              |                   | 6,040                    |      |
| gDNA_Solyc10g044510 | <b>AAATGCTTC</b>   | <b>AAGCTGTAA</b>  | <b>CTCTGTTATT</b>  | <b>TATACAAGTT</b> | <b>TTGTCGGATT</b>        | 6050 |
| cDNASolyc10g044510  | -----              | -----             | -----              | -----             | -----                    | 1215 |
| SIMLO13_LEAF        | -----              | -----             | -----              | -----             | -----                    | 1072 |
| SIMLO13_ROOT        | -----              | -----             | -----              | -----             | -----                    | 1215 |
| SIMLO13_FLOWER      | -----              | -----             | -----              | -----             | -----                    | 1215 |
| SIMLO13_FRUIT       | -----              | -----             | -----              | -----             | -----                    | 1215 |
|                     | 6,060              |                   | 6,080              |                   | 6,100                    |      |
| gDNA_Solyc10g044510 | <b>TGTCATTTT</b>   | <b>CACCTTGTAT</b> | <b>GTTAAGCTAA</b>  | <b>AAACTTCAAG</b> | <b>TTTCAGTCCT</b>        | 6100 |
| cDNASolyc10g044510  | -----              | -----             | -----              | -----             | -----                    | 1215 |
| SIMLO13_LEAF        | -----              | -----             | -----              | -----             | -----                    | 1072 |
| SIMLO13_ROOT        | -----              | -----             | -----              | -----             | -----                    | 1215 |
| SIMLO13_FLOWER      | -----              | -----             | -----              | -----             | -----                    | 1215 |
| SIMLO13_FRUIT       | -----              | -----             | -----              | -----             | -----                    | 1215 |
|                     |                    | 6,120             |                    | 6,140             |                          |      |
| gDNA_Solyc10g044510 | <b>GTTAGTTTCT</b>  | <b>TCATTAATCC</b> | <b>ATCATTACCA</b>  | <b>AGTCCAGTAC</b> | <b>TTTCAAAATA</b>        | 6150 |
| cDNASolyc10g044510  | -----              | -----             | -----              | -----             | -----                    | 1215 |
| SIMLO13_LEAF        | -----              | -----             | -----              | -----             | -----                    | 1072 |
| SIMLO13_ROOT        | -----              | -----             | -----              | -----             | -----                    | 1215 |
| SIMLO13_FLOWER      | -----              | -----             | -----              | -----             | -----                    | 1215 |
| SIMLO13_FRUIT       | -----              | -----             | -----              | -----             | -----                    | 1215 |
|                     | 6,160              |                   | 6,180              |                   | 6,200                    |      |
| gDNA_Solyc10g044510 | <b>AAATGTCAAT</b>  | <b>GGCCAACGAA</b> | <b>ACCAAAGAT</b>   | <b>ATAATTGCTG</b> | <b>AGTGTTCAT</b>         | 6200 |
| cDNASolyc10g044510  | -----              | -----             | -----              | -----             | -----                    | 1215 |
| SIMLO13_LEAF        | -----              | -----             | -----              | -----             | -----                    | 1072 |
| SIMLO13_ROOT        | -----              | -----             | -----              | -----             | -----                    | 1215 |
| SIMLO13_FLOWER      | -----              | -----             | -----              | -----             | -----                    | 1215 |
| SIMLO13_FRUIT       | -----              | -----             | -----              | -----             | -----                    | 1215 |
|                     |                    | 6,220             |                    | 6,240             |                          |      |
| gDNA_Solyc10g044510 | <b>CAGAATCTGG</b>  | <b>CTCCTTAAT</b>  | <b>TAATGGCTCT</b>  | <b>TATGACTCTT</b> | <b>CTAAGTAGTT</b>        | 6250 |
| cDNASolyc10g044510  | -----              | -----             | -----              | -----             | -----                    | 1215 |
| SIMLO13_LEAF        | -----              | -----             | -----              | -----             | -----                    | 1072 |
| SIMLO13_ROOT        | -----              | -----             | -----              | -----             | -----                    | 1215 |
| SIMLO13_FLOWER      | -----              | -----             | -----              | -----             | -----                    | 1215 |
| SIMLO13_FRUIT       | -----              | -----             | -----              | -----             | -----                    | 1215 |
|                     | 6,260              |                   | 6,280              |                   | 6,300                    |      |
| gDNA_Solyc10g044510 | <b>ATTGAAC TAA</b> | <b>AGTAGAGCTA</b> | <b>TTAAGACTGT</b>  | <b>CTTTCTTGAA</b> | <b>TAAAGCATGG</b>        | 6300 |
| cDNASolyc10g044510  | -----              | -----             | -----              | -----             | -----                    | 1215 |
| SIMLO13_LEAF        | -----              | -----             | -----              | -----             | -----                    | 1072 |
| SIMLO13_ROOT        | -----              | -----             | -----              | -----             | -----                    | 1215 |
| SIMLO13_FLOWER      | -----              | -----             | -----              | -----             | -----                    | 1215 |
| SIMLO13_FRUIT       | -----              | -----             | -----              | -----             | -----                    | 1215 |
|                     |                    | 6,320             |                    | 6,340             |                          |      |
| gDNA_Solyc10g044510 | <b>AACGGAAATC</b>  | <b>AAGTAAAAGA</b> | <b>CTAACTACCA</b>  | <b>ACACATATAT</b> | <b>CATGGTTTTC</b>        | 6350 |
| cDNASolyc10g044510  | -----              | -----             | -----              | -----             | -----                    | 1215 |
| SIMLO13_LEAF        | -----              | -----             | -----              | -----             | -----                    | 1072 |
| SIMLO13_ROOT        | -----              | -----             | -----              | -----             | -----                    | 1215 |
| SIMLO13_FLOWER      | -----              | -----             | -----              | -----             | -----                    | 1215 |
| SIMLO13_FRUIT       | -----              | -----             | -----              | -----             | -----                    | 1215 |
|                     | 6,360              |                   | 6,380              |                   | 6,400                    |      |
| gDNA_Solyc10g044510 | <b>TTCTTGTTAA</b>  | <b>TTAAAAATA</b>  | <b>TATTCATTGA</b>  | <b>GAATGATTCT</b> | <b>TGCTTTTTCA</b>        | 6400 |
| cDNASolyc10g044510  | -----              | -----             | -----              | -----             | -----                    | 1215 |
| SIMLO13_LEAF        | -----              | -----             | -----              | -----             | -----                    | 1072 |
| SIMLO13_ROOT        | -----              | -----             | -----              | -----             | -----                    | 1215 |
| SIMLO13_FLOWER      | -----              | -----             | -----              | -----             | -----                    | 1215 |
| SIMLO13_FRUIT       | -----              | -----             | -----              | -----             | -----                    | 1215 |
|                     |                    | 6,420             |                    | 6,440             |                          |      |
| gDNA_Solyc10g044510 | <b>GATGCTACAT</b>  | <b>TATTTTTTAG</b> | <b>ATGCATAATA</b>  | <b>TTTTATATAA</b> | <b>TTAGTCTTAT</b>        | 6450 |
| cDNASolyc10g044510  | -----              | -----             | -----              | -----             | -----                    | 1215 |
| SIMLO13_LEAF        | -----              | -----             | -----              | -----             | -----                    | 1072 |
| SIMLO13_ROOT        | -----              | -----             | -----              | -----             | -----                    | 1215 |
| SIMLO13_FLOWER      | -----              | -----             | -----              | -----             | -----                    | 1215 |
| SIMLO13_FRUIT       | -----              | -----             | -----              | -----             | -----                    | 1215 |
|                     | 6,460              |                   | 6,480              |                   | 6,500                    |      |
| gDNA_Solyc10g044510 | <b>ATTTATTTAT</b>  | <b>AAATGGACCA</b> | <b>ATTTGGCACT</b>  | <b>CACTCTATGT</b> | <b>ACAGG<b>GTTCT</b></b> | 6500 |
| cDNASolyc10g044510  | -----              | -----             | -----              | -----             | ----- <b>GTTCT</b>       | 1220 |
| SIMLO13_LEAF        | -----              | -----             | -----              | -----             | ----- <b>GTTCT</b>       | 1077 |
| SIMLO13_ROOT        | -----              | -----             | -----              | -----             | ----- <b>GTTCT</b>       | 1220 |
| SIMLO13_FLOWER      | -----              | -----             | -----              | -----             | ----- <b>GTTCT</b>       | 1220 |
| SIMLO13_FRUIT       | -----              | -----             | -----              | -----             | ----- <b>GTTCT</b>       | 1220 |
|                     |                    | 6,520             |                    | 6,540             |                          |      |
| gDNA_Solyc10g044510 | <b>TGTGCAGTTC</b>  | <b>TGGTGTAGCC</b> | <b>ACAGTACTGT</b>  | <b>TCCTTTAAAT</b> | <b>GTGATTATCT</b>        | 6550 |
| cDNASolyc10g044510  | <b>TGTGCAGTTC</b>  | <b>TGGTGTAGCC</b> | <b>ACAGTACTGT</b>  | <b>TCCTTTAAAT</b> | <b>GTGATTATCT</b>        | 1270 |
| SIMLO13_LEAF        | <b>TGTGCAGTTC</b>  | <b>TGGTGTAGCC</b> | <b>ACAGTACTGT</b>  | <b>TCCTTTAAAT</b> | <b>GTGATTATCT</b>        | 1127 |
| SIMLO13_ROOT        | <b>TGTGCAGTTC</b>  | <b>TGGTGTAGCC</b> | <b>ACAGTACTGT</b>  | <b>TCCTTTAAAT</b> | <b>GTGATTATCT</b>        | 1270 |
| SIMLO13_FLOWER      | <b>TGTGCAGTTC</b>  | <b>TGGTGTAGCC</b> | <b>ACAGTACTGT</b>  | <b>TCCTTTAAAT</b> | <b>GTGATTATCT</b>        | 1270 |
| SIMLO13_FRUIT       | <b>TGTGCAGTTC</b>  | <b>TGGTGTAGCC</b> | <b>ACAGTACTGT</b>  | <b>TCCTTTAAAT</b> | <b>GTGATTATCT</b>        | 1270 |
|                     | 6,560              |                   | 6,580              |                   | 6,600                    |      |
| gDNA_Solyc10g044510 | <b>CGCAGG TGAT</b> | <b>CCTTCTTTCT</b> | <b>TGTTTTATATC</b> | <b>TCTAGCATAA</b> | <b>TGCATAGTAA</b>        | 6600 |
| cDNASolyc10g044510  | <b>CGCAG</b> ----- | -----             | -----              | -----             | -----                    | 1275 |
| SIMLO13_LEAF        | <b>CGCAG</b> ----- | -----             | -----              | -----             | -----                    | 1132 |
| SIMLO13_ROOT        | <b>CGCAG</b> ----- | -----             | -----              | -----             | -----                    | 1275 |
| SIMLO13_FLOWER      | <b>CGCAG</b> ----- | -----             | -----              | -----             | -----                    | 1275 |
| SIMLO13_FRUIT       | <b>CGCAG</b> ----- | -----             | -----              | -----             | -----                    | 1275 |

|                     |                    |                       |                    |                    |                    |      |
|---------------------|--------------------|-----------------------|--------------------|--------------------|--------------------|------|
|                     |                    | 6,620                 |                    | 6,640              |                    |      |
| gDNA_Solyc10g044510 | <b>GTATTGATAT</b>  | <b>GCCAATTGAA</b>     | <b>CTAGTCACAT</b>  | <b>AGAGACAGAT</b>  | <b>ATCAGCTTTC</b>  | 6650 |
| cDNASolyc10g044510  | -----              | -----                 | -----              | -----              | -----              | 1275 |
| SIMLO13_LEAF        | -----              | -----                 | -----              | -----              | -----              | 1132 |
| SIMLO13_ROOT        | -----              | -----                 | -----              | -----              | -----              | 1275 |
| SIMLO13_FLOWER      | -----              | -----                 | -----              | -----              | -----              | 1275 |
| SIMLO13_FRUIT       | -----              | -----                 | -----              | -----              | -----              | 1275 |
|                     |                    | 6,660                 |                    | 6,680              |                    |      |
| gDNA_Solyc10g044510 | <b>CAATAATTTT</b>  | <b>TTGGTTTACA</b>     | <b>GATGGGTTCA</b>  | <b>CGGTGTGGAA</b>  | <b>AGGCTCTCGT</b>  | 6700 |
| cDNASolyc10g044510  | -----              | -----                 | -ATGGGTTCA         | CGGTGTGGAA         | AGGCTCTCGT         | 1304 |
| SIMLO13_LEAF        | -----              | -----                 | CA                 | GATGGGTTCA         | CGGTGTGGAA         | 1164 |
| SIMLO13_ROOT        | -----              | -----                 | -ATGGGTTCA         | CGGTGTGGAA         | AGGCTCTCGT         | 1304 |
| SIMLO13_FLOWER      | -----              | -----                 | -ATGGGTTCA         | CGGTGTGGAA         | AGGCTCTCGT         | 1304 |
| SIMLO13_FRUIT       | -----              | -----                 | -ATGGGTTCA         | CGGTGTGGAA         | AGGCTCTCGT         | 1304 |
|                     |                    | 6,720                 |                    | 6,740              |                    |      |
| gDNA_Solyc10g044510 | <b>AGCTGAAAGT</b>  | <b>GTTGAGACT</b>      | <b>CAC TCCACAG</b> | <b>TTGGTGTAAA</b>  | <b>AGAGTAAAGG</b>  | 6750 |
| cDNASolyc10g044510  | <b>AGCTGAAAGT</b>  | <b>GTTGAGACT</b>      | <b>CAC TCCACAG</b> | <b>TTGGTGTAAA</b>  | <b>AGAGTAAAGG</b>  | 1354 |
| SIMLO13_LEAF        | <b>AGCTGAAAGT</b>  | <b>GTTGAGACT</b>      | <b>CAC TCCACAG</b> | <b>TTGGTGTAAA</b>  | <b>AGAGTAAAGG</b>  | 1214 |
| SIMLO13_ROOT        | <b>AGCTGAAAGT</b>  | <b>GTTGAGACT</b>      | <b>CAC TCCACAG</b> | <b>TTGGTGTAAA</b>  | <b>AGAGTAAAGG</b>  | 1354 |
| SIMLO13_FLOWER      | <b>AGCTGAAAGT</b>  | <b>GTTGAGACT</b>      | <b>CAC TCCACAG</b> | <b>TTGGTGTAAA</b>  | <b>AGAGTAAAGG</b>  | 1354 |
| SIMLO13_FRUIT       | <b>AGCTGAAAGT</b>  | <b>GTTGAGACT</b>      | <b>CAC TCCACAG</b> | <b>TTGGTGTAAA</b>  | <b>AGAGTAAAGG</b>  | 1354 |
|                     |                    | 6,760                 |                    | 6,780              |                    |      |
| gDNA_Solyc10g044510 | <b>ACAGATCGAA</b>  | <b>ACACGATGCT</b>     | <b>CTACGATCTA</b>  | <b>TAACTACAAG</b>  | <b>ATCAACATGT</b>  | 6800 |
| cDNASolyc10g044510  | <b>ACAGATCGAA</b>  | <b>ACACGATGCT</b>     | <b>CTACGATCTA</b>  | <b>TAACTACAAG</b>  | <b>ATCAACATGT</b>  | 1404 |
| SIMLO13_LEAF        | <b>ACAGATCGAA</b>  | <b>ACACGATGCT</b>     | <b>CTACGATCTA</b>  | <b>TAACTACAAG</b>  | <b>ATCAACATGT</b>  | 1264 |
| SIMLO13_ROOT        | <b>ACAGATCGAA</b>  | <b>ACACGATGCT</b>     | <b>CTACGATCTA</b>  | <b>TAACTACAAG</b>  | <b>ATCAACATGT</b>  | 1404 |
| SIMLO13_FLOWER      | <b>ACAGATCGAA</b>  | <b>ACACGATGCT</b>     | <b>CTACGATCTA</b>  | <b>TAACTACAAG</b>  | <b>ATCAACATGT</b>  | 1404 |
| SIMLO13_FRUIT       | <b>ACAGATCGAA</b>  | <b>ACACGATGCT</b>     | <b>CTACGATCTA</b>  | <b>TAACTACAAG</b>  | <b>ATCAACATGT</b>  | 1404 |
|                     |                    | 6,820                 |                    | 6,840              |                    |      |
| gDNA_Solyc10g044510 | <b>TCCCTTGGAT</b>  | <b>CAACAATTGA</b>     | <b>TGAGGGGGAT</b>  | <b>GAGATAGCAA</b>  | <b>CAGTGGCATC</b>  | 6850 |
| cDNASolyc10g044510  | <b>TCCCTTGGAT</b>  | <b>CAACAATTGA</b>     | <b>TGAGGGGGAT</b>  | <b>GAGATAGCAA</b>  | <b>CAGTGGCATC</b>  | 1454 |
| SIMLO13_LEAF        | <b>TCCCTTGGAT</b>  | <b>CAACAATTGA</b>     | <b>TGAGGGGGAT</b>  | <b>GAGATAGCAA</b>  | <b>CAGTGGCATC</b>  | 1314 |
| SIMLO13_ROOT        | <b>TCCCTTGGAT</b>  | <b>CAACAATTGA</b>     | <b>TGAGGGGGAT</b>  | <b>GAGATAGCAA</b>  | <b>CAGTGGCATC</b>  | 1454 |
| SIMLO13_FLOWER      | <b>TCCCTTGGAT</b>  | <b>CAACAATTGA</b>     | <b>TGAGGGGGAT</b>  | <b>GAGATAGCAA</b>  | <b>CAGTGGCATC</b>  | 1454 |
| SIMLO13_FRUIT       | <b>TCCCTTGGAT</b>  | <b>CAACAATTGA</b>     | <b>TGAGGGGGAT</b>  | <b>GAGATAGCAA</b>  | <b>CAGTGGCATC</b>  | 1454 |
|                     |                    | 6,860                 |                    | 6,880              |                    |      |
| gDNA_Solyc10g044510 | <b>AGTAACTTTA</b>  | <b>TCTCCATGTT</b>     | <b>CCTCTAGAGG</b>  | <b>CTCATTTAAC</b>  | <b>CACCTAGATG</b>  | 6900 |
| cDNASolyc10g044510  | <b>AGTAACTTTA</b>  | <b>TCTCCATGTT</b>     | <b>CCTCTAGAGG</b>  | <b>CTCATTTAAC</b>  | <b>CACCTAGATG</b>  | 1504 |
| SIMLO13_LEAF        | <b>AGTAACTTTA</b>  | <b>TCTCCATGTT</b>     | <b>CCTCTAGAGG</b>  | <b>CTCATTTAAC</b>  | <b>CACCTAGATG</b>  | 1364 |
| SIMLO13_ROOT        | <b>AGTAACTTTA</b>  | <b>TCTCCATGTT</b>     | <b>CCTCTAGAGG</b>  | <b>CTCATTTAAC</b>  | <b>CACCTAGATG</b>  | 1504 |
| SIMLO13_FLOWER      | <b>AGTAACTTTA</b>  | <b>TCTCCATGTT</b>     | <b>CCTCTAGAGG</b>  | <b>CTCATTTAAC</b>  | <b>CACCTAGATG</b>  | 1504 |
| SIMLO13_FRUIT       | <b>AGTAACTTTA</b>  | <b>TCTCCATGTT</b>     | <b>CCTCTAGAGG</b>  | <b>CTCATTTAAC</b>  | <b>CACCTAGATG</b>  | 1504 |
|                     |                    | 6,920                 |                    | 6,940              |                    |      |
| gDNA_Solyc10g044510 | <b>AGAAGGTTCT</b>  | <b>GTCTAATGAT</b>     | <b>CACCAAGAAG</b>  | <b>ATTGCA TTGT</b> | <b>TGAAAC TACA</b> | 6950 |
| cDNASolyc10g044510  | <b>AGAAGGTTCT</b>  | <b>GTCTAATGAT</b>     | <b>CACCAAGAAG</b>  | <b>ATTGCA TTGT</b> | <b>TGAAAC TACA</b> | 1554 |
| SIMLO13_LEAF        | <b>AGAAGGTTCT</b>  | <b>GTCTAATGAT</b>     | <b>CACCAAGAAG</b>  | <b>ATTGCA TTGT</b> | <b>TGAAAC TACA</b> | 1414 |
| SIMLO13_ROOT        | <b>AGAAGGTTCT</b>  | <b>GTCTAATGAT</b>     | <b>CACCAAGAAG</b>  | <b>ATTGCA TTGT</b> | <b>TGAAAC TACA</b> | 1554 |
| SIMLO13_FLOWER      | <b>AGAAGGTTCT</b>  | <b>GTCTAATGAT</b>     | <b>CACCAAGAAG</b>  | <b>ATTGCA TTGT</b> | <b>TGAAAC TACA</b> | 1554 |
| SIMLO13_FRUIT       | <b>AGAAGGTTCT</b>  | <b>GTCTAATGAT</b>     | <b>CACCAAGAAG</b>  | <b>ATTGCA TTGT</b> | <b>TGAAAC TACA</b> | 1554 |
|                     |                    | 6,960                 |                    | 6,980              |                    |      |
| gDNA_Solyc10g044510 | <b>AACCAACCAG</b>  | <b>GT CATGAA TT</b>   | <b>ATCCTT CAGA</b> | <b>AACAGTGAAG</b>  | <b>TTCTGGT CAC</b> | 7000 |
| cDNASolyc10g044510  | <b>AACCAACCAG</b>  | <b>GT CATGAA TT</b>   | <b>ATCCTT CAGA</b> | <b>AACAGTGAAG</b>  | <b>TTCTGGT CAC</b> | 1604 |
| SIMLO13_LEAF        | <b>AACCAACCAG</b>  | <b>GT CATGAA TT</b>   | <b>ATCCTT CAGA</b> | <b>AACAGTGAAG</b>  | <b>TTCTGGT CAC</b> | 1464 |
| SIMLO13_ROOT        | <b>AACCAACCAG</b>  | <b>GT CATGAA TT</b>   | <b>ATCCTT CAGA</b> | <b>AACAGTGAAG</b>  | <b>TTCTGGT CAC</b> | 1604 |
| SIMLO13_FLOWER      | <b>AACCAACCAG</b>  | <b>GT CATGAA TT</b>   | <b>ATCCTT CAGA</b> | <b>AACAGTGAAG</b>  | <b>TTCTGGT CAC</b> | 1604 |
| SIMLO13_FRUIT       | <b>AACCAACCAG</b>  | <b>GT CATGAA TT</b>   | <b>ATCCTT CAGA</b> | <b>AACAGTGAAG</b>  | <b>TTCTGGT CAC</b> | 1604 |
|                     |                    | 7,020                 |                    | 7,040              |                    |      |
| gDNA_Solyc10g044510 | <b>TGATGCAGAG</b>  | <b>GAGATTGTGG</b>     | <b>ATGATGAAGC</b>  | <b>AGACAAGATA</b>  | <b>GAAACTCTCT</b>  | 7050 |
| cDNASolyc10g044510  | <b>TGATGCAGAG</b>  | <b>GAGATTGTGG</b>     | <b>ATGATGAAGC</b>  | <b>AGACAAGATA</b>  | <b>GAAACTCTCT</b>  | 1654 |
| SIMLO13_LEAF        | <b>TGATGCAGAG</b>  | <b>GAGATTGTGG</b>     | <b>ATGATGAAGC</b>  | <b>AGACAAGATA</b>  | <b>GAAACTCTCT</b>  | 1514 |
| SIMLO13_ROOT        | <b>TGATGCAGAG</b>  | <b>GAGATTGTGG</b>     | <b>ATGATGAAGC</b>  | <b>AGACAAGATA</b>  | <b>GAAACTCTCT</b>  | 1654 |
| SIMLO13_FLOWER      | <b>TGATGCAGAG</b>  | <b>GAGATTGTGG</b>     | <b>ATGATGAAGC</b>  | <b>AGACAAGATA</b>  | <b>GAAACTCTCT</b>  | 1654 |
| SIMLO13_FRUIT       | <b>TGATGCAGAG</b>  | <b>GAGATTGTGG</b>     | <b>ATGATGAAGC</b>  | <b>AGACAAGATA</b>  | <b>GAAACTCTCT</b>  | 1654 |
|                     |                    | 7,060                 |                    |                    |                    |      |
| gDNA_Solyc10g044510 | <b>TCGAA TTGTT</b> | <b>CCAGAAGACG TAA</b> |                    |                    |                    | 7073 |
| cDNASolyc10g044510  | <b>TCGAA TTGTT</b> | <b>CCAGAAGACG TAA</b> |                    |                    |                    | 1677 |
| SIMLO13_LEAF        | <b>TCGAA TTGTT</b> | <b>CCAGAAGACG TAA</b> |                    |                    |                    | 1537 |
| SIMLO13_ROOT        | <b>TCGAA TTGTT</b> | <b>CCAGAAGACG TAA</b> |                    |                    |                    | 1677 |
| SIMLO13_FLOWER      | <b>TCGAA TTGTT</b> | <b>CCAGAAGACG TAA</b> |                    |                    |                    | 1677 |
| SIMLO13_FRUIT       | <b>TCGAA TTGTT</b> | <b>CCAGAAGACG TAA</b> |                    |                    |                    | 1677 |

```

                20                               40
gDNA_Solyc02g077570 <ATGGCAGGTT CAAACAAACAG TAGAGTCATA ACTCTTGTGA CAACACCAAC 50
cDNA_Solyc02g077570 <ATGGCAGGTT CAAACAAACAG TAGAGTCATA ACTCTTGTGA CAACACCAAC 50
SIMLO15_LEAF <ATGGCAGGTT CAAACAAACAG TAGAGTCATA ACTCTTGTGA CAACACCAAC 50
SIMLO15_ROOT <ATGGCAGGTT CAAACAAACAG TAGAGTCATA ACTCTTGTGA CAACACCAAC 50
SIMLO15_FLOWER <ATGGCAGGTT CAAACAAACAG TAGAGTCATA ACTCTTGTGA CAACACCAAC 50
SIMLO15_FRUIT <-----

                60                               80                               100
gDNA_Solyc02g077570 ATGGGCTATT GCTGTTGTGT GTTTCATTTT AATTACTATT TCCATTCTTA 100
cDNA_Solyc02g077570 ATGGGCTATT GCTGTTGTGT GTTTCATTTT AATTACTATT TCCATTCTTA 100
SIMLO15_LEAF ATGGGCTATT GCTGTTGTGT GTTTCATTTT AATTACTATT TCCATTCTTA 100
SIMLO15_ROOT ATGGGCTATT GCTGTTGTGT GTTTCATTTT AATTACTATT TCCATTCTTA 100
SIMLO15_FLOWER ATGGGCTATT GCTGTTGTGT GTTTCATTTT AATTACTATT TCCATTCTTA 100
SIMLO15_FRUIT -----

                120                               140
gDNA_Solyc02g077570 TAGAACATGT CCTTCATCTC TTAGCTAAGG TATGTTTGTGA TTTTGCATG 150
cDNA_Solyc02g077570 TAGAACATGT CCTTCATCTC TTAGCTAAGG ----- 129
SIMLO15_LEAF TAGAACATGT CCTTCATCTC TTAGCTAAGG ----- 129
SIMLO15_ROOT TAGAACATGT CCTTCATCTC TTAGCTAAGG TATGTTTGTGA TTTTGCATG 150
SIMLO15_FLOWER TAGAACATGT CCTTCATCTC TTAGCTAAGG ----- 129
SIMLO15_FRUIT -----

                160                               180                               200
gDNA_Solyc02g077570 AGACTGTTTT CGGATTTATA ACCCGACAAC AACACTTACT ATTCTTGACA 200
cDNA_Solyc02g077570 ----- 129
SIMLO15_LEAF ----- 129
SIMLO15_ROOT AGACTGTTTT CGGATTTATA ACCCGACAAC AACACTTACT ATTCTTGACA 200
SIMLO15_FLOWER ----- 129
SIMLO15_FRUIT -----

                220                               240
gDNA_Solyc02g077570 AACTTCAAAT TTTGATTGTT AACCTTGAC TACTTCAACA AGAAGAGGAG 250
cDNA_Solyc02g077570 ----- 129
SIMLO15_LEAF ----- 129
SIMLO15_ROOT AACTTCAAAT TTTGATTGTT AACCTTGAC TACTTCAACA AGAAGAGGAG 250
SIMLO15_FLOWER ----- 129
SIMLO15_FRUIT -----

                260                               280                               300
gDNA_Solyc02g077570 GAAGTCTTTG ATTCAAGCAC TAAACAATAT CAAATCAGGT ACTACTAATT 300
cDNA_Solyc02g077570 ----- 129
SIMLO15_LEAF ----- 129
SIMLO15_ROOT GAAGTCTTTG ATTCAAGCAC TAAACAATAT CAAATCAGGT ACTACTAATT 300
SIMLO15_FLOWER ----- 129
SIMLO15_FRUIT -----

                320                               340
gDNA_Solyc02g077570 GAATATATAA TTGGTTTTAG CTAGCTAGCT GGTTGCTTGA CTTTTGTATA 350
cDNA_Solyc02g077570 ----- 129
SIMLO15_LEAF ----- 129
SIMLO15_ROOT GAATATATAA TTGGTTTTAG CTAGCTAGCT GGTTGCTTGA CTTTTGTATA 350
SIMLO15_FLOWER ----- 129
SIMLO15_FRUIT -----

                360                               380                               400
gDNA_Solyc02g077570 TATAAAATTT TTGTTTCAAG AGTTGATGCT TTTGGGATTT ATCTCTTTAT 400
cDNA_Solyc02g077570 ----- 154
SIMLO15_LEAF ----- 157
SIMLO15_ROOT TATAAAATTT TTGTTTCAAG AGTTGATGCT TTTGGGATTT ATCTCTTTAT 400
SIMLO15_FLOWER ----- 135
SIMLO15_FRUIT ----- 26

                420                               440
gDNA_Solyc02g077570 TGCTGAATGT TCTCCAAAAG CCTATTGCCA AAATTTGTAT TCCAAAGGGT 450
cDNA_Solyc02g077570 TGCTGAATGT TCTCCAAAAG CCTATTGCCA AAATTTGTAT TCCAAAGGGT 204
SIMLO15_LEAF TGCTGAATGT TCTCCAAAAG CCTATTGCCA AAATTTGTAT TCCAAAGGGT 207
SIMLO15_ROOT TGCTGAATGT TCTCCAAAAG CCTATTGCCA AAATTTGTAT TCCAAAGGGT 450
SIMLO15_FLOWER ----- 151
SIMLO15_FRUIT TGCTGAATGT TCTCCAAAAG CCTATTGCCA AAATTTGTAT TCCAAAGGGT 76

                460                               480                               500
gDNA_Solyc02g077570 GCTGCTCAGA CTTTTCTTCC TTGCCAAAGC TTCACAACCTG ATGATGTTGA 500
cDNA_Solyc02g077570 GCTGCTCAGA CTTTTCTTCC TTGCCAAAGC TTCACAACCTG ATGATGTTGA 254
SIMLO15_LEAF GCTGCTCAGA CTTTTCTTCC TTGCCAAAGC TTCACAACCTG ATGATGTTGA 257
SIMLO15_ROOT GCTGCTCAGA CTTTTCTTCC TTGCCAAAGC CTCACAACCTG ATGATGTTGA 500
SIMLO15_FLOWER ----- 167
SIMLO15_FRUIT GCTGCTCAGA CTTTTCTTCC TTGCCAAAGC TTCACAACCTG ATGATGTTGA 126

                520                               540
gDNA_Solyc02g077570 GGAGGAGTCA AACGTGAAC AACAGGCTTT TTTTTTATT AATTAGCTGC 550
cDNA_Solyc02g077570 GGAGGAGTCA AACGTGAAC AACAGG----- 280
SIMLO15_LEAF GGAGGAGTCA AACGTGAAC AACAGG----- 283
SIMLO15_ROOT GGAGGAGTCA AACGTGAAC AACAGG----- 526
SIMLO15_FLOWER ----- 173
SIMLO15_FRUIT GGAGGAGTCA AACGTGAAC AACAGG----- 152

                560                               580                               600
gDNA_Solyc02g077570 TTTTCTCATC CGCAATCAAC AGGAAATTTT TGTGTGAAA CATGATTTTC 600
cDNA_Solyc02g077570 ----- 280
SIMLO15_LEAF ----- 283
SIMLO15_ROOT ----- 526
SIMLO15_FLOWER ----- 173
SIMLO15_FRUIT ----- 152

```

|                     |                     |                     |                     |                     |                          |
|---------------------|---------------------|---------------------|---------------------|---------------------|--------------------------|
|                     |                     | 620                 |                     | 640                 |                          |
| gDNA_Solyc02g077570 | CTACACTATT          | TCCACCGAAC          | TAGCTCACTT          | GAAAAACAAA          | TTCTTATTGA 650           |
| cDNA_Solyc02g077570 | -----               | -----               | -----               | -----               | 280                      |
| SIMLO15_LEAF        | -----               | -----               | -----               | -----               | 283                      |
| SIMLO15_ROOT        | -----               | -----               | -----               | -----               | 526                      |
| SIMLO15_FLOWER      | -----               | -----               | -----               | -----               | 173                      |
| SIMLO15_FRUIT       | -----               | -----               | -----               | -----               | 152                      |
|                     | 660                 |                     | 680                 |                     | 700                      |
| gDNA_Solyc02g077570 | AATATTTGTG          | TAAACATTTT          | TCAAAGGGAA          | AATAGTGATT          | ATTTTAGTAA 700           |
| cDNA_Solyc02g077570 | -----               | -----               | -----               | -----               | 280                      |
| SIMLO15_LEAF        | -----               | -----               | -----               | -----               | 283                      |
| SIMLO15_ROOT        | -----               | -----               | -----               | -----               | 526                      |
| SIMLO15_FLOWER      | -----               | -----               | -----               | -----               | 173                      |
| SIMLO15_FRUIT       | -----               | -----               | -----               | -----               | 152                      |
|                     |                     | 720                 |                     | 740                 |                          |
| gDNA_Solyc02g077570 | TATTTTATGT          | GTTTTCAGGG          | AAAGAAATCT          | TTAATGTCAA          | GAGCAGCTTC 750           |
| cDNA_Solyc02g077570 | -----               | -----G              | AAAGAAATCT          | TTAATGTCAA          | GAGCAGCTTC 311           |
| SIMLO15_LEAF        | -----               | -----G              | AAAGAAATCT          | TTAATGTCAA          | GAGCAGCTTC 314           |
| SIMLO15_ROOT        | -----               | -----G              | AAAGAAATCT          | TTAATGTCAA          | GAGCAGCTTC 557           |
| SIMLO15_FLOWER      | -----               | -----G              | AAAGAAATCT          | TTAATGTCAA          | GAGCAGCTTC 204           |
| SIMLO15_FRUIT       | -----               | -----G              | AAAGAAATCT          | TTAATGTCAA          | GAGCAGCTTC 183           |
|                     | 760                 |                     | 780                 |                     | 800                      |
| gDNA_Solyc02g077570 | AGCTTTTAAT          | ATTTGCTCTT          | GCTTTCCTTC          | ATATTCCTTC          | TTGCATCC TC 800          |
| cDNA_Solyc02g077570 | AGCTTTTAAT          | ATTTGCTCTT          | GCTTTCCTTC          | ATATTCCTTC          | TTGCATCC TC 361          |
| SIMLO15_LEAF        | AGCTTTTAAT          | ATTTGCTCTT          | GCTTTCCTTC          | ATATTCCTTC          | TTGCATCC TC 364          |
| SIMLO15_ROOT        | AGCTTTTAAT          | ATTTGCTCTT          | GCTTTCCTTC          | ATATTCCTTC          | TTGCATCC TC 607          |
| SIMLO15_FLOWER      | AGCTTTTAAT          | ATTTGCTCTT          | GCTTTCCTTC          | ATATTCCTTC          | TTGCATCC TC 254          |
| SIMLO15_FRUIT       | AGCTTTTAAT          | ATTTGCTCTT          | GCTTTCCTTC          | ATATTCCTTC          | TTGCATCC TC 233          |
|                     |                     | 820                 |                     | 840                 |                          |
| gDNA_Solyc02g077570 | ACCTTCAGCC          | TTGGAACACG          | TAAGGTAATT          | AATTAACCTT          | TAGTTGTGTA 850           |
| cDNA_Solyc02g077570 | ACCTTCAGCC          | TTGGAACAC -         | -----               | -----               | 380                      |
| SIMLO15_LEAF        | ACCTTCAGCC          | TTGGAACAC -         | -----               | -----               | 383                      |
| SIMLO15_ROOT        | ACCTTCAGCC          | TTGGAACACG          | TAAG                | -----               | 631                      |
| SIMLO15_FLOWER      | ACCTTCAGCC          | TTGGAACACG          | TAAG                | -----               | 278                      |
| SIMLO15_FRUIT       | ACCTTCAGCC          | TTGGAACACG          | TAAG                | -----               | 257                      |
|                     | 860                 |                     | 880                 |                     | 900                      |
| gDNA_Solyc02g077570 | GTA A A A T C A C   | C T T T A C T T A T | T T T G T G A T T G | T T T A A A G T G A | T T T T C A T T G 900    |
| cDNA_Solyc02g077570 | -----               | -----               | -----               | -----               | 380                      |
| SIMLO15_LEAF        | -----               | -----               | -----               | -----               | 383                      |
| SIMLO15_ROOT        | -----               | -----               | -----               | -----               | 631                      |
| SIMLO15_FLOWER      | -----               | -----               | -----               | -----               | 278                      |
| SIMLO15_FRUIT       | -----               | -----               | -----               | -----               | 257                      |
|                     |                     | 920                 |                     | 940                 |                          |
| gDNA_Solyc02g077570 | C A A A A A T T T C | T A A A A T A C A C | T A C T A C A T A T | A T T A T C A C C A | T T T T G A T A A C 950  |
| cDNA_Solyc02g077570 | -----               | -----               | -----               | -----               | 380                      |
| SIMLO15_LEAF        | -----               | -----               | -----               | -----               | 383                      |
| SIMLO15_ROOT        | -----               | -----               | -----               | -----               | 631                      |
| SIMLO15_FLOWER      | -----               | -----               | -----               | -----               | 278                      |
| SIMLO15_FRUIT       | -----               | -----               | -----               | -----               | 257                      |
|                     | 960                 |                     | 980                 |                     | 1,000                    |
| gDNA_Solyc02g077570 | T A T G T A G A G A | A T A A T C A A A T | C C C A A A C C A A | C A G T A A C A A A | G A A G T A G G G A 1000 |
| cDNA_Solyc02g077570 | -----               | -----               | -----               | -----               | 380                      |
| SIMLO15_LEAF        | -----               | -----               | -----               | -----               | 383                      |
| SIMLO15_ROOT        | -----               | -----               | -----               | -----               | 631                      |
| SIMLO15_FLOWER      | -----               | -----               | -----               | -----               | 278                      |
| SIMLO15_FRUIT       | -----               | -----               | -----               | -----               | 257                      |
|                     |                     | 1,020               |                     | 1,040               |                          |
| gDNA_Solyc02g077570 | A A T C G A A A T C | G A A G T C T T A T | A T T T G A A A C A | T T A T T A T T T T | T G C T A G T G A T 1050 |
| cDNA_Solyc02g077570 | -----               | -----               | -----               | -----               | 380                      |
| SIMLO15_LEAF        | -----               | -----               | -----               | -----               | 383                      |
| SIMLO15_ROOT        | -----               | -----               | -----               | -----               | 631                      |
| SIMLO15_FLOWER      | -----               | -----               | -----               | -----               | 278                      |
| SIMLO15_FRUIT       | -----               | -----               | -----               | -----               | 257                      |
|                     | 1,060               |                     | 1,080               |                     | 1,100                    |
| gDNA_Solyc02g077570 | T G T C A G T C T T | G T A G A C A A T T | T G T C A A C T A T | T G A A T A C G T A | G C T T G A G T T G 1100 |
| cDNA_Solyc02g077570 | -----               | -----               | -----               | -----               | 380                      |
| SIMLO15_LEAF        | -----               | -----               | -----               | -----               | 383                      |
| SIMLO15_ROOT        | -----               | -----               | -----               | -----               | 631                      |
| SIMLO15_FLOWER      | -----               | -----               | -----               | -----               | 278                      |
| SIMLO15_FRUIT       | -----               | -----               | -----               | -----               | 257                      |
|                     |                     | 1,120               |                     | 1,140               |                          |
| gDNA_Solyc02g077570 | G A C A T T G A T C | A T A T G T A T G T | T A A T T T T T A C | T A A A T T T T T T | T T G G T A A A T G 1150 |
| cDNA_Solyc02g077570 | -----               | -----               | -----               | -----               | 380                      |
| SIMLO15_LEAF        | -----               | -----               | -----               | -----               | 383                      |
| SIMLO15_ROOT        | -----               | -----               | -----               | -----               | 631                      |
| SIMLO15_FLOWER      | -----               | -----               | -----               | -----               | 278                      |
| SIMLO15_FRUIT       | -----               | -----               | -----               | -----               | 257                      |
|                     | 1,160               |                     | 1,180               |                     | 1,200                    |
| gDNA_Solyc02g077570 | G T C A G A T G G A | A A T T T T G G G A | G G C A G A A A C A | A C A A C C T T A G | A T T A T C A A T T 1200 |
| cDNA_Solyc02g077570 | -----ATGGA          | A A T T T T G G G A | G G C A G A A A C A | A C A A C C T T A G | A T T A T C A A T T 425  |
| SIMLO15_LEAF        | -----ATGGA          | A A T T T T G G G A | G G C A G A A A C A | A C A A C C T T A G | A T T A T C A A T T 428  |
| SIMLO15_ROOT        | -----ATGGA          | A A T T T T G G G A | G G C A G A A A C A | A C A A C C T T A G | A T T A T C A A T T 676  |
| SIMLO15_FLOWER      | -----ATGGA          | A A T T T T G G G A | G G C A G A A A C A | A C A A C C T T A G | A T T A T C A A T T 323  |
| SIMLO15_FRUIT       | -----ATGGA          | A A T T T T G G G A | G G C A G A A A C A | A C A A C C T T A G | A T T A T C A A T T 302  |



|                     |             |            |            |             |            |
|---------------------|-------------|------------|------------|-------------|------------|
|                     |             | 1,220      |            | 1,240       |            |
| gDNA_Solyc02g077570 | TTCACATGGT  | AAGCTGTCAC | ATCCTCCTGT | GGTAAATAAT  | TAATATTTTA |
| cDNA_Solyc02g077570 | TTCACAT     | -----      | -----      | -----       | -----      |
| SIMLO15_LEAF        | TTCACAT     | -----      | -----      | -----       | -----      |
| SIMLO15_ROOT        | TTCACAT     | -----      | -----      | -----       | -----      |
| SIMLO15_FLOWER      | TTCACAT     | -----      | -----      | -----       | -----      |
| SIMLO15_FRUIT       | TTCACAT     | -----      | -----      | -----       | -----      |
|                     | 1,260       |            | 1,280      |             | 1,300      |
| gDNA_Solyc02g077570 | GGTTTGGACA  | AGGAAAACAC | TTATTCTAAA | AAATTAACAG  | GGGTTATGAA |
| cDNA_Solyc02g077570 | -----       | -----      | -----      | -----       | -----      |
| SIMLO15_LEAF        | -----       | -----      | -----      | -----       | -----      |
| SIMLO15_ROOT        | -----       | -----      | -----      | -----       | -----      |
| SIMLO15_FLOWER      | -----       | -----      | -----      | -----       | -----      |
| SIMLO15_FRUIT       | -----       | -----      | -----      | -----       | -----      |
|                     | 1,320       |            | 1,340      |             |            |
| gDNA_Solyc02g077570 | ATGTGGCAAG  | GGCAATTTAG | AAATAAAGAA | TTAAATATCT  | TTTTTACGTA |
| cDNA_Solyc02g077570 | -----       | -----      | -----      | -----       | -----      |
| SIMLO15_LEAF        | -----       | -----      | -----      | -----       | -----      |
| SIMLO15_ROOT        | -----       | -----      | -----      | -----       | -----      |
| SIMLO15_FLOWER      | -----       | -----      | -----      | -----       | -----      |
| SIMLO15_FRUIT       | -----       | -----      | -----      | -----       | -----      |
|                     | 1,360       |            | 1,380      |             | 1,400      |
| gDNA_Solyc02g077570 | AAATATTAAT  | TATTTAGAAT | TATTCCTTTC | ATTCTATTT   | ACTTGTCGTT |
| cDNA_Solyc02g077570 | -----       | -----      | -----      | -----       | -----      |
| SIMLO15_LEAF        | -----       | -----      | -----      | -----       | -----      |
| SIMLO15_ROOT        | -----       | -----      | -----      | -----       | -----      |
| SIMLO15_FLOWER      | -----       | -----      | -----      | -----       | -----      |
| SIMLO15_FRUIT       | -----       | -----      | -----      | -----       | -----      |
|                     | 1,420       |            | 1,440      |             |            |
| gDNA_Solyc02g077570 | TTTTATCAAAA | ATTGTCATTT | CACATAATCA | ATGCATAAAT  | GACATTAAGC |
| cDNA_Solyc02g077570 | -----       | -----      | -----      | -----       | -----      |
| SIMLO15_LEAF        | -----       | -----      | -----      | -----       | -----      |
| SIMLO15_ROOT        | -----       | -----      | -----      | -----       | -----      |
| SIMLO15_FLOWER      | -----       | -----      | -----      | -----       | -----      |
| SIMLO15_FRUIT       | -----       | -----      | -----      | -----       | -----      |
|                     | 1,460       |            | 1,480      |             | 1,500      |
| gDNA_Solyc02g077570 | ATTCCATTTT  | ACCTATTAGC | CTTGAAAGTA | TATACCGTTG  | ACCAATATAA |
| cDNA_Solyc02g077570 | -----       | -----      | -----      | -----       | -----      |
| SIMLO15_LEAF        | -----       | -----      | -----      | -----       | -----      |
| SIMLO15_ROOT        | -----       | -----      | -----      | -----       | -----      |
| SIMLO15_FLOWER      | -----       | -----      | -----      | -----       | -----      |
| SIMLO15_FRUIT       | -----       | -----      | -----      | -----       | -----      |
|                     | 1,520       |            | 1,540      |             |            |
| gDNA_Solyc02g077570 | AAAGACTTAT  | TTAGCAAGTA | ATTCATGTTC | ATTTGTTAAA  | TTAATTAATC |
| cDNA_Solyc02g077570 | -----       | -----      | -----      | -----       | -----      |
| SIMLO15_LEAF        | -----       | -----      | -----      | -----       | -----      |
| SIMLO15_ROOT        | -----       | -----      | -----      | -----       | -----      |
| SIMLO15_FLOWER      | -----       | -----      | -----      | -----       | -----      |
| SIMLO15_FRUIT       | -----       | -----      | -----      | -----       | -----      |
|                     | 1,560       |            | 1,580      |             | 1,600      |
| gDNA_Solyc02g077570 | AAAGTAAATT  | AATTCATGTT | TATTTATTGA | AAACTTGAAT  | TCAAATGAAT |
| cDNA_Solyc02g077570 | -----       | -----      | -----      | -----       | -----      |
| SIMLO15_LEAF        | -----       | -----      | -----      | -----       | -----      |
| SIMLO15_ROOT        | -----       | -----      | -----      | -----       | -----      |
| SIMLO15_FLOWER      | -----       | -----      | -----      | -----       | -----      |
| SIMLO15_FRUIT       | -----       | -----      | -----      | -----       | -----      |
|                     | 1,620       |            | 1,640      |             |            |
| gDNA_Solyc02g077570 | ACTACTAAAT  | AAGGATATAA | TGATAAACTA | ATATGGTTAC  | TTAATTGAGA |
| cDNA_Solyc02g077570 | -----       | -----      | -----      | -----       | -----      |
| SIMLO15_LEAF        | -----       | -----      | -----      | -----       | -----      |
| SIMLO15_ROOT        | -----       | -----      | -----      | -----       | -----      |
| SIMLO15_FLOWER      | -----       | -----      | -----      | -----       | -----      |
| SIMLO15_FRUIT       | -----       | -----      | -----      | -----       | -----      |
|                     | 1,660       |            | 1,680      |             | 1,700      |
| gDNA_Solyc02g077570 | GGGGTGAAGC  | CTAAATTATT | ATATATCAAG | TATTAATAATC | ATTATAATCT |
| cDNA_Solyc02g077570 | -----       | -----      | -----      | -----       | -----      |
| SIMLO15_LEAF        | -----       | -----      | -----      | -----       | -----      |
| SIMLO15_ROOT        | -----       | -----      | -----      | -----       | -----      |
| SIMLO15_FLOWER      | -----       | -----      | -----      | -----       | -----      |
| SIMLO15_FRUIT       | -----       | -----      | -----      | -----       | -----      |
|                     | 1,720       |            | 1,740      |             |            |
| gDNA_Solyc02g077570 | CACAATCTTA  | GCAACATATT | ATCTTGTTC  | TAAATATAGA  | AAAAATAAGT |
| cDNA_Solyc02g077570 | -----       | -----      | -----      | -----       | -----      |
| SIMLO15_LEAF        | -----       | -----      | -----      | -----       | -----      |
| SIMLO15_ROOT        | -----       | -----      | -----      | -----       | -----      |
| SIMLO15_FLOWER      | -----       | -----      | -----      | -----       | -----      |
| SIMLO15_FRUIT       | -----       | -----      | -----      | -----       | -----      |
|                     | 1,760       |            | 1,780      |             | 1,800      |
| gDNA_Solyc02g077570 | TTTTTTTCTA  | TTTATTTTTT | TACGTAGGAT | CTTCTCTTTT  | TTCCGTTTA  |
| cDNA_Solyc02g077570 | -----       | -----      | -----      | -----       | -----      |
| SIMLO15_LEAF        | -----       | -----      | -----      | -----       | -----      |
| SIMLO15_ROOT        | -----       | -----      | -----      | -----       | -----      |
| SIMLO15_FLOWER      | -----       | -----      | -----      | -----       | -----      |
| SIMLO15_FRUIT       | -----       | -----      | -----      | -----       | -----      |

|                     |             |            |             |             |              |
|---------------------|-------------|------------|-------------|-------------|--------------|
|                     |             | 1,820      |             | 1,840       |              |
| gDNA_Solyc02g077570 | TATAATATTT  | TTATTGTAAT | CTTTTGTAA   | CAACATATTA  | ATCCGTGATT   |
| cDNA_Solyc02g077570 | -----       | -----      | -----       | -----       | -----        |
| SIMLO15_LEAF        | -----       | -----      | -----       | -----       | -----        |
| SIMLO15_ROOT        | -----       | -----      | -----       | -----       | -----        |
| SIMLO15_FLOWER      | -----       | -----      | -----       | -----       | -----        |
| SIMLO15_FRUIT       | -----       | -----      | -----       | -----       | -----        |
|                     | 1,860       |            | 1,880       |             | 1,900        |
| gDNA_Solyc02g077570 | AATAAATTAC  | CTAGAGATAA | TCAAAC TATT | TGAACAACT   | AATTTCAATT   |
| cDNA_Solyc02g077570 | -----       | -----      | -----       | -----       | -----        |
| SIMLO15_LEAF        | -----       | -----      | -----       | -----       | -----        |
| SIMLO15_ROOT        | -----       | -----      | -----       | -----       | -----        |
| SIMLO15_FLOWER      | -----       | -----      | -----       | -----       | -----        |
| SIMLO15_FRUIT       | -----       | -----      | -----       | -----       | -----        |
|                     |             | 1,920      |             | 1,940       |              |
| gDNA_Solyc02g077570 | TTATAATAAG  | ATTACGAATA | TGGTGATACC  | AATACATACG  | GTAGATTAAT   |
| cDNA_Solyc02g077570 | -----       | -----      | -----       | -----       | -----        |
| SIMLO15_LEAF        | -----       | -----      | -----       | -----       | -----        |
| SIMLO15_ROOT        | -----       | -----      | -----       | -----       | -----        |
| SIMLO15_FLOWER      | -----       | -----      | -----       | -----       | -----        |
| SIMLO15_FRUIT       | -----       | -----      | -----       | -----       | -----        |
|                     | 1,960       |            | 1,980       |             | 2,000        |
| gDNA_Solyc02g077570 | TATAGTTTCT  | ATACTTCTAT | TCAGTTAATT  | ATTCTTTTAA  | ATTAGATAAA   |
| cDNA_Solyc02g077570 | -----       | -----      | -----       | -----       | -----        |
| SIMLO15_LEAF        | -----       | -----      | -----       | -----       | -----        |
| SIMLO15_ROOT        | -----       | -----      | -----       | -----       | -----        |
| SIMLO15_FLOWER      | -----       | -----      | -----       | -----       | -----        |
| SIMLO15_FRUIT       | -----       | -----      | -----       | -----       | -----        |
|                     |             | 2,020      |             | 2,040       |              |
| gDNA_Solyc02g077570 | AATGAGTTAA  | TTATTCTTTT | AAATTAGATA  | AAAAAAATTA  | TTTAAAAGAA   |
| cDNA_Solyc02g077570 | -----       | -----      | -----       | -----       | -----        |
| SIMLO15_LEAF        | -----       | -----      | -----       | -----       | -----        |
| SIMLO15_ROOT        | -----       | -----      | -----       | -----       | -----        |
| SIMLO15_FLOWER      | -----       | -----      | -----       | -----       | -----        |
| SIMLO15_FRUIT       | -----       | -----      | -----       | -----       | -----        |
|                     | 2,060       |            | 2,080       |             | 2,100        |
| gDNA_Solyc02g077570 | AATTA AAAAT | AACCTTACGT | ATAAAAAGAAA | TTTAGAAA GA | GATTTTCCCC   |
| cDNA_Solyc02g077570 | -----       | -----      | -----       | -----       | -----        |
| SIMLO15_LEAF        | -----       | -----      | -----       | -----       | -----        |
| SIMLO15_ROOT        | -----       | -----      | -----       | -----       | -----        |
| SIMLO15_FLOWER      | -----       | -----      | -----       | -----       | -----        |
| SIMLO15_FRUIT       | -----       | -----      | -----       | -----       | -----        |
|                     |             | 2,120      |             | 2,140       |              |
| gDNA_Solyc02g077570 | CCTATATTTA  | TGGACAAGAT | AATATGTTGC  | TAAGAAGGTA  | ATATTA AAAAT |
| cDNA_Solyc02g077570 | -----       | -----      | -----       | -----       | -----        |
| SIMLO15_LEAF        | -----       | -----      | -----       | -----       | -----        |
| SIMLO15_ROOT        | -----       | -----      | -----       | -----       | -----        |
| SIMLO15_FLOWER      | -----       | -----      | -----       | -----       | -----        |
| SIMLO15_FRUIT       | -----       | -----      | -----       | -----       | -----        |
|                     | 2,160       |            | 2,180       |             | 2,200        |
| gDNA_Solyc02g077570 | AATTTTAAAT  | ATTTAATATA | TAATGTATTT  | ATTAATTAAA  | TCATGGTTAG   |
| cDNA_Solyc02g077570 | -----       | -----      | -----       | -----       | -----        |
| SIMLO15_LEAF        | -----       | -----      | -----       | -----       | -----        |
| SIMLO15_ROOT        | -----       | -----      | -----       | -----       | -----        |
| SIMLO15_FLOWER      | -----       | -----      | -----       | -----       | -----        |
| SIMLO15_FRUIT       | -----       | -----      | -----       | -----       | -----        |
|                     |             | 2,220      |             | 2,240       |              |
| gDNA_Solyc02g077570 | AGATTTACTT  | TGAACATTAA | ATCTTAACTA  | TTTATTTTAA  | CTTATGCCAT   |
| cDNA_Solyc02g077570 | -----       | -----      | -----       | -----       | -----        |
| SIMLO15_LEAF        | -----       | -----      | -----       | -----       | -----        |
| SIMLO15_ROOT        | -----       | -----      | -----       | -----       | -----        |
| SIMLO15_FLOWER      | -----       | -----      | -----       | -----       | -----        |
| SIMLO15_FRUIT       | -----       | -----      | -----       | -----       | -----        |
|                     | 2,260       |            | 2,280       |             | 2,300        |
| gDNA_Solyc02g077570 | GTGTCATTAA  | TCCAAATAGG | AACTTAGAGA  | AAAAAATAGA  | GAGGAATCAA   |
| cDNA_Solyc02g077570 | -----       | -----      | -----       | -----       | -----        |
| SIMLO15_LEAF        | -----       | -----      | -----       | -----       | -----        |
| SIMLO15_ROOT        | -----       | -----      | -----       | -----       | -----        |
| SIMLO15_FLOWER      | -----       | -----      | -----       | -----       | -----        |
| SIMLO15_FRUIT       | -----       | -----      | -----       | -----       | -----        |
|                     |             | 2,320      |             | 2,340       |              |
| gDNA_Solyc02g077570 | ATCCATTTAT  | AAGTGATTAG | AAATAATTAA  | AAAAGAAAAA  | GTACACGAAT   |
| cDNA_Solyc02g077570 | -----       | -----      | -----       | -----       | -----        |
| SIMLO15_LEAF        | -----       | -----      | -----       | -----       | -----        |
| SIMLO15_ROOT        | -----       | -----      | -----       | -----       | -----        |
| SIMLO15_FLOWER      | -----       | -----      | -----       | -----       | -----        |
| SIMLO15_FRUIT       | -----       | -----      | -----       | -----       | -----        |
|                     | 2,360       |            | 2,380       |             | 2,400        |
| gDNA_Solyc02g077570 | AATTAGAAAC  | CGGAGAGTAA | CAACTAAACA  | TCAATTATTC  | ATGTCGTCTA   |
| cDNA_Solyc02g077570 | -----       | -----      | -----       | -----       | -----        |
| SIMLO15_LEAF        | -----       | -----      | -----       | -----       | -----        |
| SIMLO15_ROOT        | -----       | -----      | -----       | -----       | -----        |
| SIMLO15_FLOWER      | -----       | -----      | -----       | -----       | -----        |
| SIMLO15_FRUIT       | -----       | -----      | -----       | -----       | -----        |

|                     |            |            |            |            |             |      |
|---------------------|------------|------------|------------|------------|-------------|------|
|                     |            | 2,420      |            | 2,440      |             |      |
| gDNA_Solyc02g077570 | TCTATACTGT | AGGGACATTT | ATTTCTTGTC | TCAACTAAAC | ACATTATTAT  | 2450 |
| cDNA_Solyc02g077570 | -----      | -----      | -----      | -----      | -----       | 432  |
| SIMLO15_LEAF        | -----      | -----      | -----      | -----      | -----       | 435  |
| SIMLO15_ROOT        | -----      | -----      | -----      | -----      | -----       | 683  |
| SIMLO15_FLOWER      | -----      | -----      | -----      | -----      | -----       | 330  |
| SIMLO15_FRUIT       | -----      | -----      | -----      | -----      | -----       | 309  |
|                     | 2,460      |            | 2,480      |            | 2,500       |      |
| gDNA_Solyc02g077570 | ATGAACAATT | ATTATGTCCC | AAGATATAGG | CTTAATAAGG | AAAATGTTTC  | 2500 |
| cDNA_Solyc02g077570 | -----      | -----      | -----      | -----      | -----       | 432  |
| SIMLO15_LEAF        | -----      | -----      | -----      | -----      | -----       | 435  |
| SIMLO15_ROOT        | -----      | -----      | -----      | -----      | -----       | 683  |
| SIMLO15_FLOWER      | -----      | -----      | -----      | -----      | -----       | 330  |
| SIMLO15_FRUIT       | -----      | -----      | -----      | -----      | -----       | 309  |
|                     |            | 2,520      |            | 2,540      |             |      |
| gDNA_Solyc02g077570 | ATGAAAAAAA | AAGATGCAAG | TTAGCTGTAC | CATAAACGAA | TATTTCTTTT  | 2550 |
| cDNA_Solyc02g077570 | -----      | -----      | -----      | -----      | -----       | 432  |
| SIMLO15_LEAF        | -----      | -----      | -----      | -----      | -----       | 435  |
| SIMLO15_ROOT        | -----      | -----      | -----      | -----      | -----       | 683  |
| SIMLO15_FLOWER      | -----      | -----      | -----      | -----      | -----       | 330  |
| SIMLO15_FRUIT       | -----      | -----      | -----      | -----      | -----       | 309  |
|                     | 2,560      |            | 2,580      |            | 2,600       |      |
| gDNA_Solyc02g077570 | TATATGTCCA | CGTTTATTTG | ATATTAATTT | TTATCATATT | GATATGCAAA  | 2600 |
| cDNA_Solyc02g077570 | -----      | -----      | -----      | -----      | -----       | 432  |
| SIMLO15_LEAF        | -----      | -----      | -----      | -----      | -----       | 435  |
| SIMLO15_ROOT        | -----      | -----      | -----      | -----      | -----       | 683  |
| SIMLO15_FLOWER      | -----      | -----      | -----      | -----      | -----       | 330  |
| SIMLO15_FRUIT       | -----      | -----      | -----      | -----      | -----       | 309  |
|                     |            | 2,620      |            | 2,640      |             |      |
| gDNA_Solyc02g077570 | AAATTATAGT | TATAGTACTT | TTTGTATATA | GTTTTTAAAT | GTCTAAATTT  | 2650 |
| cDNA_Solyc02g077570 | -----      | -----      | -----      | -----      | -----       | 432  |
| SIMLO15_LEAF        | -----      | -----      | -----      | -----      | -----       | 435  |
| SIMLO15_ROOT        | -----      | -----      | -----      | -----      | -----       | 683  |
| SIMLO15_FLOWER      | -----      | -----      | -----      | -----      | -----       | 330  |
| SIMLO15_FRUIT       | -----      | -----      | -----      | -----      | -----       | 309  |
|                     | 2,660      |            | 2,680      |            | 2,700       |      |
| gDNA_Solyc02g077570 | TTTGTTTAAA | ATATCGAATT | AATGTAATTT | AATTTAACTT | TGAAAATTAC  | 2700 |
| cDNA_Solyc02g077570 | -----      | -----      | -----      | -----      | -----       | 432  |
| SIMLO15_LEAF        | -----      | -----      | -----      | -----      | -----       | 435  |
| SIMLO15_ROOT        | -----      | -----      | -----      | -----      | -----       | 683  |
| SIMLO15_FLOWER      | -----      | -----      | -----      | -----      | -----       | 330  |
| SIMLO15_FRUIT       | -----      | -----      | -----      | -----      | -----       | 309  |
|                     |            | 2,720      |            | 2,740      |             |      |
| gDNA_Solyc02g077570 | TTAACTATTT | AACTTTCAAA | AAGTACAACA | TGACAATTAA | GAACGGACAG  | 2750 |
| cDNA_Solyc02g077570 | -----      | -----      | -----      | -----      | -----       | 432  |
| SIMLO15_LEAF        | -----      | -----      | -----      | -----      | -----       | 435  |
| SIMLO15_ROOT        | -----      | -----      | -----      | -----      | -----       | 683  |
| SIMLO15_FLOWER      | -----      | -----      | -----      | -----      | -----       | 330  |
| SIMLO15_FRUIT       | -----      | -----      | -----      | -----      | -----       | 309  |
|                     | 2,760      |            | 2,780      |            | 2,800       |      |
| gDNA_Solyc02g077570 | AAAGGGTTTT | ACTAAACAAA | TTTTAATCTA | TTATAGTATG | TTTCTTCATA  | 2800 |
| cDNA_Solyc02g077570 | -----      | -----      | -----      | -----      | -----       | 432  |
| SIMLO15_LEAF        | -----      | -----      | -----      | -----      | -----       | 435  |
| SIMLO15_ROOT        | -----      | -----      | -----      | -----      | -----       | 683  |
| SIMLO15_FLOWER      | -----      | -----      | -----      | -----      | -----       | 330  |
| SIMLO15_FRUIT       | -----      | -----      | -----      | -----      | -----       | 309  |
|                     |            | 2,820      |            | 2,840      |             |      |
| gDNA_Solyc02g077570 | ATTTTTTTAA | TCGTACATAT | TATATAGAGA | GTAGACTTAT | TTATAAGGTA  | 2850 |
| cDNA_Solyc02g077570 | -----      | -----      | -----      | -----      | -----       | 432  |
| SIMLO15_LEAF        | -----      | -----      | -----      | -----      | -----       | 435  |
| SIMLO15_ROOT        | -----      | -----      | -----      | -----      | -----       | 683  |
| SIMLO15_FLOWER      | -----      | -----      | -----      | -----      | -----       | 330  |
| SIMLO15_FRUIT       | -----      | -----      | -----      | -----      | -----       | 309  |
|                     | 2,860      |            | 2,880      |            | 2,900       |      |
| gDNA_Solyc02g077570 | ATTTGTAATT | AAATTTCAAT | GATATGATTA | TCTAAATATG | TACATAGAAA  | 2900 |
| cDNA_Solyc02g077570 | -----      | -----      | -----      | -----      | -----       | 432  |
| SIMLO15_LEAF        | -----      | -----      | -----      | -----      | -----       | 435  |
| SIMLO15_ROOT        | -----      | -----      | -----      | -----      | -----       | 683  |
| SIMLO15_FLOWER      | -----      | -----      | -----      | -----      | -----       | 330  |
| SIMLO15_FRUIT       | -----      | -----      | -----      | -----      | -----       | 309  |
|                     |            | 2,920      |            | 2,940      |             |      |
| gDNA_Solyc02g077570 | TTTAACACTC | TGAACTTTCA | ACATATATAA | TAATGACAAT | TTCAAACAAA  | 2950 |
| cDNA_Solyc02g077570 | -----      | -----      | -----      | -----      | -----       | 432  |
| SIMLO15_LEAF        | -----      | -----      | -----      | -----      | -----       | 435  |
| SIMLO15_ROOT        | -----      | -----      | -----      | -----      | -----       | 683  |
| SIMLO15_FLOWER      | -----      | -----      | -----      | -----      | -----       | 330  |
| SIMLO15_FRUIT       | -----      | -----      | -----      | -----      | -----       | 309  |
|                     | 2,960      |            | 2,980      |            | 3,000       |      |
| gDNA_Solyc02g077570 | GACGTGAGGG | TGTTTTTTTT | CTTCTTTCAT | GTTTGTTTAA | GTTTCGTTTAA | 3000 |
| cDNA_Solyc02g077570 | -----      | -----      | -----      | -----      | -----       | 432  |
| SIMLO15_LEAF        | -----      | -----      | -----      | -----      | -----       | 435  |
| SIMLO15_ROOT        | -----      | -----      | -----      | -----      | -----       | 683  |
| SIMLO15_FLOWER      | -----      | -----      | -----      | -----      | -----       | 330  |
| SIMLO15_FRUIT       | -----      | -----      | -----      | -----      | -----       | 309  |

|                     |            |             |             |             |             |
|---------------------|------------|-------------|-------------|-------------|-------------|
|                     |            | 3,020       |             | 3,040       |             |
| gDNA_Solyc02g077570 | ACATTTCTTT | TCATTTTGAT  | TATTTTTTTA  | ATTTCAACTT  | TTTATATATG  |
| cDNA_Solyc02g077570 | -----      | -----       | -----       | -----       | -----       |
| SIMLO15_LEAF        | -----      | -----       | -----       | -----       | -----       |
| SIMLO15_ROOT        | -----      | -----       | -----       | -----       | -----       |
| SIMLO15_FLOWER      | -----      | -----       | -----       | -----       | -----       |
| SIMLO15_FRUIT       | -----      | -----       | -----       | -----       | -----       |
|                     | 3,060      |             | 3,080       |             | 3,100       |
| gDNA_Solyc02g077570 | TTTAGGATTT | TAGCATATTT  | GAATATATCT  | TTAATTTATG  | ATTATAAATT  |
| cDNA_Solyc02g077570 | -----      | -----       | -----       | -----       | -----       |
| SIMLO15_LEAF        | -----      | -----       | -----       | -----       | -----       |
| SIMLO15_ROOT        | -----      | -----       | -----       | -----       | -----       |
| SIMLO15_FLOWER      | -----      | -----       | -----       | -----       | -----       |
| SIMLO15_FRUIT       | -----      | -----       | -----       | -----       | -----       |
|                     |            | 3,120       |             | 3,140       |             |
| gDNA_Solyc02g077570 | CGAAAAATCT | CTTTTCTTTC  | ATAAACTCCA  | TATCAAATC   | ATAATATACA  |
| cDNA_Solyc02g077570 | -----      | -----       | -----       | -----       | -----       |
| SIMLO15_LEAF        | -----      | -----       | -----       | -----       | -----       |
| SIMLO15_ROOT        | -----      | -----       | -----       | -----       | -----       |
| SIMLO15_FLOWER      | -----      | -----       | -----       | -----       | -----       |
| SIMLO15_FRUIT       | -----      | -----       | -----       | -----       | -----       |
|                     | 3,160      |             | 3,180       |             | 3,200       |
| gDNA_Solyc02g077570 | AATTGAAACA | AAAGAAATCA  | CAATTTTCTA  | TATTGATAAT  | AAACAAAATC  |
| cDNA_Solyc02g077570 | -----      | -----       | -----       | -----       | -----       |
| SIMLO15_LEAF        | -----      | -----       | -----       | -----       | -----       |
| SIMLO15_ROOT        | -----      | -----       | -----       | -----       | -----       |
| SIMLO15_FLOWER      | -----      | -----       | -----       | -----       | -----       |
| SIMLO15_FRUIT       | -----      | -----       | -----       | -----       | -----       |
|                     |            | 3,220       |             | 3,240       |             |
| gDNA_Solyc02g077570 | TTCCACTTTT | TAATTGGTGT  | CTAATTATTT  | AATGTTTTTT  | TATAGATCCA  |
| cDNA_Solyc02g077570 | -----      | -----       | -----       | -----       | -----GATCCA |
| SIMLO15_LEAF        | -----      | -----       | -----       | -----       | -----GATCCA |
| SIMLO15_ROOT        | -----      | -----       | -----       | -----       | -----GATCCA |
| SIMLO15_FLOWER      | -----      | -----       | -----       | -----       | -----GATCCA |
| SIMLO15_FRUIT       | -----      | -----       | -----       | -----       | -----GATCCA |
|                     | 3,260      |             | 3,280       |             | 3,300       |
| gDNA_Solyc02g077570 | AGGAGGTTTC | AAC TAATTCA | TCAAACATCA  | TTCGG AAAGA | GGCATCTCAA  |
| cDNA_Solyc02g077570 | AGGAGGTTTC | AAC TAATTCA | TCAAACATCA  | TTCGG AAAGA | GGCATCTCAA  |
| SIMLO15_LEAF        | AGGAGGTTTC | AAC TAATTCA | TCAAACATCA  | TTCGG AAAGA | GGCATCTCAA  |
| SIMLO15_ROOT        | AGGAGGTTTC | AAC TAATTCA | TCAAACATCA  | TTCGG AAAGA | GGCATCTCAA  |
| SIMLO15_FLOWER      | AGGAGGTTTC | AAC TAATTCA | TCAAACATCA  | TTCGG AAAGA | GGCATCTCAA  |
| SIMLO15_FRUIT       | AGGAGGTTTC | AAC TAATTCA | TCAAACATCA  | TTCGG AAAGA | GGCATCTCAA  |
|                     |            | 3,320       |             | 3,340       |             |
| gDNA_Solyc02g077570 | TTTTTGGAGT | GAACACCGCT  | TTCTACGTTT  | CCCAGTACGT  | AACTAACTTA  |
| cDNA_Solyc02g077570 | TTTTTGGAGT | GAACACCGCT  | TTCTACGTTT  | CCCAGT      | -----       |
| SIMLO15_LEAF        | TTTTTGGAGT | GAACACCGCT  | TTCTACGTTT  | CCCAGT      | -----       |
| SIMLO15_ROOT        | TTTTTGGAGT | GAACACCGCT  | TTCTACGTTT  | CCCAGT      | -----       |
| SIMLO15_FLOWER      | TTTTTGGAGT | GAACACCGCT  | TTCTACGTTT  | CCCAGT      | -----       |
| SIMLO15_FRUIT       | TTTTTGGAGT | GAACACCGCT  | TTCTACGTTT  | CCCANN      | -----       |
|                     | 3,360      |             | 3,380       |             | 3,400       |
| gDNA_Solyc02g077570 | ATTTTGTCTG | CTCTGATATT  | ATGTTAAAGT  | GTGTAATTAT  | CTTATTTTAA  |
| cDNA_Solyc02g077570 | -----      | -----       | -----       | -----       | -----       |
| SIMLO15_LEAF        | -----      | -----       | -----       | -----       | -----       |
| SIMLO15_ROOT        | -----      | -----       | -----       | -----       | -----       |
| SIMLO15_FLOWER      | -----      | -----       | -----       | -----       | -----       |
| SIMLO15_FRUIT       | -----      | -----       | -----       | -----       | -----       |
|                     |            | 3,420       |             | 3,440       |             |
| gDNA_Solyc02g077570 | AATTTAAATA | TTTAAAATA   | ACATTTTAAAT | TATTTAATTA  | TATTTTCAAC  |
| cDNA_Solyc02g077570 | -----      | -----       | -----       | -----       | -----       |
| SIMLO15_LEAF        | -----      | -----       | -----       | -----       | -----       |
| SIMLO15_ROOT        | -----      | -----       | -----       | -----       | -----       |
| SIMLO15_FLOWER      | -----      | -----       | -----       | -----       | -----       |
| SIMLO15_FRUIT       | -----      | -----       | -----       | -----       | -----       |
|                     | 3,460      |             | 3,480       |             | 3,500       |
| gDNA_Solyc02g077570 | CGTTCCTTTT | ACTTTTTTGT  | GCTAGCCAGG  | TTTGTTTGTT  | GAGGCAATTT  |
| cDNA_Solyc02g077570 | -----      | -----       | -----       | TT-GTTTGT   | GAGGCAATTT  |
| SIMLO15_LEAF        | -----      | -----       | -----       | TT-GTTTGT   | GAGGCAATTT  |
| SIMLO15_ROOT        | -----      | -----       | -----       | TTTGTTTGTT  | GAGGCAATTT  |
| SIMLO15_FLOWER      | -----      | -----       | -----       | TT-GTTTGT   | GAGGCAATTT  |
| SIMLO15_FRUIT       | -----      | -----       | -----       | TTTGTTTGTT  | GAGGCAANTT  |
|                     |            | 3,520       |             | 3,540       |             |
| gDNA_Solyc02g077570 | TATGGATCAG | TATATAAAGT  | AGACTACTTA  | ACTCTCCGGC  | ATGGATTCAT  |
| cDNA_Solyc02g077570 | TATGGATCAG | TATATAAAGT  | AGACTACTTA  | ACTCTCCGGC  | ATGGATTCAT  |
| SIMLO15_LEAF        | TATGGATCAG | TATATAAAGT  | AGACTACTTA  | ACTCTCCGGC  | ATGGATTCAT  |
| SIMLO15_ROOT        | TATGGATCAG | TATATAAAGT  | AGACTACTTA  | ACTCTCCGGC  | ATGGATTCAT  |
| SIMLO15_FLOWER      | TATGGATCAG | TATATAAAGT  | AGACTACTTA  | ACTCTCCGGC  | ATGGATTCAT  |
| SIMLO15_FRUIT       | TATGGATCAG | TATATAAAGT  | AGACTACTTA  | ACTCTCCGGC  | ATG-ATTTCAT |
|                     | 3,560      |             | 3,580       |             | 3,600       |
| gDNA_Solyc02g077570 | AATGGTATTT | ACAAAACCTT  | TTTTTCTTTT  | TTTAATGTAT  | GATGAATTAA  |
| cDNA_Solyc02g077570 | AATGG----- | -----       | -----       | -----       | -----       |
| SIMLO15_LEAF        | AATGG----- | -----       | -----       | -----       | -----       |
| SIMLO15_ROOT        | AATGG----- | -----       | -----       | -----       | -----       |
| SIMLO15_FLOWER      | AATGG----- | -----       | -----       | -----       | -----       |
| SIMLO15_FRUIT       | AATGG----- | -----       | -----       | -----       | -----       |

|                     |            |             |            |            |             |      |
|---------------------|------------|-------------|------------|------------|-------------|------|
|                     |            | 3,620       |            | 3,640      |             |      |
| gDNA_Solyc02g077570 | TTACAATATG | TGAGATTAAG  | GCATATACTT | ACTTCTCTTT | AATTTTTATT  | 3650 |
| cDNA_Solyc02g077570 | -----      | -----       | -----      | -----      | -----       | 598  |
| SIMLO15_LEAF        | -----      | -----       | -----      | -----      | -----       | 601  |
| SIMLO15_ROOT        | -----      | -----       | -----      | -----      | -----       | 850  |
| SIMLO15_FLOWER      | -----      | -----       | -----      | -----      | -----       | 496  |
| SIMLO15_FRUIT       | -----      | -----       | -----      | -----      | -----       | 475  |
|                     | 3,660      |             | 3,660      |            | 3,700       |      |
| gDNA_Solyc02g077570 | TATTAGGCAC | ATTTTGCTGA  | AGGAACAGAG | TTTGATTTTC | -ACAAGTATA  | 3699 |
| cDNA_Solyc02g077570 | -----CAC   | ATTTTGCTGA  | AGGAACAGAG | TTTGATTTTC | -ACAAGTATA  | 640  |
| SIMLO15_LEAF        | -----CAC   | ATTTTGCTGA  | AGGAACAGAG | TTTGATTTTC | -ACAAGTATA  | 643  |
| SIMLO15_ROOT        | -----CAC   | ATTTTGCTGA  | AGGAACAGAG | TTTGATTTTC | -ACAAGTATA  | 892  |
| SIMLO15_FLOWER      | -----CAC   | CTTTTGCTGA  | AGGAACAGAG | TTGTTTTTC  | -ACAAGTATA  | 538  |
| SIMLO15_FRUIT       | -----CAC   | ATTTTGCTGA  | AGGAACAGAT | TTTAATTTTC | ACAAGTATA   | 518  |
|                     |            | 3,720       |            | 3,740      |             |      |
| gDNA_Solyc02g077570 | TAAGAAGAGC | TTTAGATAAA  | G-ATTTTCAA | GTTGTCGTGG | CAATTAGGTA  | 3748 |
| cDNA_Solyc02g077570 | TAAGAAGAGC | TTTAGATAAA  | G-ATTTTCAA | GTTGTCGTGG | CAATTAG---  | 686  |
| SIMLO15_LEAF        | TAAGAAGAGC | TTTAGATAAA  | G-ATTTTCAA | GTTGTCGTGG | CAATTAG---  | 689  |
| SIMLO15_ROOT        | TAAGAAGAGC | TTTAGATAAA  | G-ATTTTCAA | GTTGTCGTGG | CAATTAG---  | 938  |
| SIMLO15_FLOWER      | TAAGAAGAGC | TTTAGATAAA  | G-ATTTTCAA | GTTGTCGTGG | CAATTAG---  | 584  |
| SIMLO15_FRUIT       | TAAGAAGAGC | TTTAGATAAA  | GGATTTCCAA | GTTGTTGGGG | CAATTGA---  | 565  |
|                     | 3,760      |             | 3,780      |            | 3,800       |      |
| gDNA_Solyc02g077570 | ACGTTATTAT | ATATGTGGAA  | AAATGCATTT | TTCATAATTT | AATTAAGTAG  | 3798 |
| cDNA_Solyc02g077570 | -----      | -----       | -----      | -----      | -----       | 686  |
| SIMLO15_LEAF        | -----      | -----       | -----      | -----      | -----       | 689  |
| SIMLO15_ROOT        | -----      | -----       | -----      | -----      | -----       | 938  |
| SIMLO15_FLOWER      | -----      | -----       | -----      | -----      | -----       | 584  |
| SIMLO15_FRUIT       | -----      | -----       | -----      | -----      | -----       | 565  |
|                     |            | 3,820       |            | 3,840      |             |      |
| gDNA_Solyc02g077570 | CTAATTACAT | TTTTTTTGT   | GTTGTTGATG | CAGCCCATGG | ATTTGGACCT  | 3848 |
| cDNA_Solyc02g077570 | -----      | -----       | -----      | ---CCCATGG | ATTTGGACCT  | 703  |
| SIMLO15_LEAF        | -----      | -----       | -----      | ---CCCATGG | ATTTGGACCT  | 706  |
| SIMLO15_ROOT        | -----      | -----       | -----      | ---CCCATGG | ATTTGGACCT  | 955  |
| SIMLO15_FLOWER      | -----      | -----       | -----      | ---CCCATGG | ATTTGGACCT  | 601  |
| SIMLO15_FRUIT       | -----      | -----       | -----      | ---CCCATGG | ATTAGGACCT  | 582  |
|                     | 3,860      |             | 3,880      |            | 3,900       |      |
| gDNA_Solyc02g077570 | TTTCTATGCT | CTTCATATTC  | TTCAATGCAA | ATGGTAAATA | TTGTAAACAAC | 3898 |
| cDNA_Solyc02g077570 | TTTCTATGCT | CTTCATATTC  | TTCAATGCAA | ATG-----   | -TGT-----   | 739  |
| SIMLO15_LEAF        | TTTCTATGCT | CTTCATATTC  | TTCAATGCAA | ATG-----   | -TGT-----   | 742  |
| SIMLO15_ROOT        | TTTCTATGCT | CTTCATATTC  | TTCAATGCAA | ATG-----   | -TGT-----   | 991  |
| SIMLO15_FLOWER      | TTTCTATGCT | CTTCATATTC  | TTCAATGCAA | ATG-----   | -TGT-----   | 637  |
| SIMLO15_FRUIT       | TTTTTATGCT | ATTTCATATTC | TTCAAAGCAA | AAA-----   | -GGT-----   | 618  |
|                     |            | 3,920       |            | 3,940      |             |      |
| gDNA_Solyc02g077570 | TGTCACAAAA | TTGTCACCAA  | AATTTATTAG | TATATTATTA | ATTTTCATTT  | 3948 |
| cDNA_Solyc02g077570 | -----      | -----       | -----      | -----      | -----       | 739  |
| SIMLO15_LEAF        | -----      | -----       | -----      | -----      | -----       | 742  |
| SIMLO15_ROOT        | -----      | -----       | -----      | -----      | -----       | 991  |
| SIMLO15_FLOWER      | -----      | -----       | -----      | -----      | -----       | 637  |
| SIMLO15_FRUIT       | -----      | -----       | -----      | -----      | -----       | 618  |
|                     | 3,960      |             | 3,980      |            | 4,000       |      |
| gDNA_Solyc02g077570 | GTTTATTTTT | GTAGTGTTC   | ATAGCACCTA | TTGGCTTCCT | T-TCATTCC   | 3997 |
| cDNA_Solyc02g077570 | -----      | ---T-CC     | ATAGCACCTA | TTGGCTTCCT | T-TCATTCC   | 771  |
| SIMLO15_LEAF        | -----      | ---T-CC     | ATAGCACCTA | TTGGCTTCCT | T-TCATTCC   | 774  |
| SIMLO15_ROOT        | -----      | ---T-CC     | ATAGCACCTA | TTGGCTTCCT | T-TCATTCC   | 1023 |
| SIMLO15_FLOWER      | -----      | ---T-CC     | ATAGCACCTA | TTGGCTTCCT | T-TCATTCC   | 669  |
| SIMLO15_FRUIT       | -----      | ---TTCC     | ATAGCACCTA | TAGGC TTTC | TATCATTCC   | 652  |
|                     |            | 4,020       |            | 4,040      |             |      |
| gDNA_Solyc02g077570 | -CTAGCGGTA | AGCAAATTTT  | ATTCAAAGGA | AAAAAAAATA | TTTATAAATG  | 4046 |
| cDNA_Solyc02g077570 | ---CTAGCG  | -----       | -----      | -----      | -----       | 777  |
| SIMLO15_LEAF        | ---CTAGCG  | -----       | -----      | -----      | -----       | 780  |
| SIMLO15_ROOT        | ---CTAGCG  | -----       | -----      | -----      | -----       | 1029 |
| SIMLO15_FLOWER      | ---CTAGCG  | -----       | -----      | -----      | -----       | 675  |
| SIMLO15_FRUIT       | TCTAGAG-   | -----       | -----      | -----      | -----       | 659  |
|                     | 4,060      |             | 4,080      |            | 4,100       |      |
| gDNA_Solyc02g077570 | AAAATTATCA | GTGTCGAGAT  | CTTAGTAAGC | TCAATTGATT | GACTATCTGA  | 4096 |
| cDNA_Solyc02g077570 | -----      | -----       | -----      | -----      | -----       | 777  |
| SIMLO15_LEAF        | -----      | -----       | -----      | -----      | -----       | 780  |
| SIMLO15_ROOT        | -----      | -----       | -----      | -----      | -----       | 1029 |
| SIMLO15_FLOWER      | -----      | -----       | -----      | -----      | -----       | 675  |
| SIMLO15_FRUIT       | -----      | -----       | -----      | -----      | -----       | 659  |
|                     |            | 4,120       |            | 4,140      |             |      |
| gDNA_Solyc02g077570 | ATTTACATT  | ATTTAAAGAT  | TTGACTCTCC | ACCTTGTAAT | TTGCTTCCCT  | 4146 |
| cDNA_Solyc02g077570 | -----      | -----       | -----      | -----      | -----       | 777  |
| SIMLO15_LEAF        | -----      | -----       | -----      | -----      | -----       | 780  |
| SIMLO15_ROOT        | -----      | -----       | -----      | -----      | -----       | 1029 |
| SIMLO15_FLOWER      | -----      | -----       | -----      | -----      | -----       | 675  |
| SIMLO15_FRUIT       | -----      | -----       | -----      | -----      | -----       | 659  |
|                     | 4,160      |             | 4,180      |            | 4,200       |      |
| gDNA_Solyc02g077570 | AATAAATACC | CTTCCGATCC  | CTACTTACCC | TTTATGTAAT | TAAAAATTAG  | 4196 |
| cDNA_Solyc02g077570 | -----      | -----       | -----      | -----      | -----       | 777  |
| SIMLO15_LEAF        | -----      | -----       | -----      | -----      | -----       | 780  |
| SIMLO15_ROOT        | -----      | -----       | -----      | -----      | -----       | 1029 |
| SIMLO15_FLOWER      | -----      | -----       | -----      | -----      | -----       | 675  |
| SIMLO15_FRUIT       | -----      | -----       | -----      | -----      | -----       | 659  |

```

                                4,220                                4,240
gDNA_Solyc02g077570 TGATTAGATA TATATAGGGA TAAGGCATTA GTACAAGTAA ACTATGATTG 4246
cDNA_Solyc02g077570 ----- 777
SIMLO15_LEAF ----- 780
SIMLO15_ROOT ----- 1029
SIMLO15_FLOWER ----- 675
SIMLO15_FRUIT ----- 659

                                4,260                                4,280                                4,300
gDNA_Solyc02g077570 ATATCTTAAC TTAGTTCGGA TTCTATTATC TTTTGAAGTC AATTTTTCTA 4296
cDNA_Solyc02g077570 ----- 777
SIMLO15_LEAF ----- 780
SIMLO15_ROOT ----- 1029
SIMLO15_FLOWER ----- 675
SIMLO15_FRUIT ----- 659

                                4,320                                4,340
gDNA_Solyc02g077570 TATTGTGATA CACCTTTTGT GCTGACGTGA CATATTTAAT CAGATAAAGT 4346
cDNA_Solyc02g077570 ----- 777
SIMLO15_LEAF ----- 780
SIMLO15_ROOT ----- 1029
SIMLO15_FLOWER ----- 675
SIMLO15_FRUIT ----- 659

                                4,360                                4,380                                4,400
gDNA_Solyc02g077570 TGGCTTATCC CTTAACATGT ATTGCTTTTT TCCTATGAAA TAAACACAGA 4396
cDNA_Solyc02g077570 ----- A 778
SIMLO15_LEAF ----- A 781
SIMLO15_ROOT ----- A 1030
SIMLO15_FLOWER ----- A 676
SIMLO15_FRUIT ----- A 660

                                4,420                                4,440
gDNA_Solyc02g077570 TGTTAGTGGC TGTTGGAACA AAATTACAAG GCATAATCAC AAAAATGTGT 4446
cDNA_Solyc02g077570 ----- 828
SIMLO15_LEAF TGTTAGTGGC TGTTGGAACA AAATTACAAG GCATAATCAC AAAAATGTGT 831
SIMLO15_ROOT TGTTAGTGGC CGTTGGAACA AAATTACAAG GCATAATCAC AAAAATGTGT 1080
SIMLO15_FLOWER TGTTAGTGGC TGTTGGAACA AAATTACAAG GCATAATCAC AAAA - TGTGT 725
SIMLO15_FRUIT TGTTAGTGGC TTTTGAACA AAATTACAAG GCATAATCAC AAAA - TGTGT 709

                                4,460                                4,480                                4,500
gDNA_Solyc02g077570 TTGGATAGCA ATTATAAGTC AAGTGTATT AGAGGAAATT TAGTGGTTAA 4496
cDNA_Solyc02g077570 ----- 878
SIMLO15_LEAF TTGGATAGCA ATTATAAGTC AAGTGTATT AGAGGAAATT TAGTGGTTAA 881
SIMLO15_ROOT TTGGATAGCA ATTATAAGTC AAGTGTATT AGAGGAAATT TAGTGGTTAA 1130
SIMLO15_FLOWER TTGGATAGCA ATTATAAGTC AAGTGTATT AGAGGAAATT TAGTGGTTAA 775
SIMLO15_FRUIT TTGGATAGCA ATTATAAGTC AAGTGTATT AGAGGAAATT TAGTGGTTAA 759

                                4,520                                4,540
gDNA_Solyc02g077570 ACCTGAAGAT CAATTCTTTT GGTTTGGAAA ACCCAAATT CTTCTTCTTC 4546
cDNA_Solyc02g077570 ----- 928
SIMLO15_LEAF ACCTGAAGAT CAATTCTTTT GGTTTGGAAA ACCCAAATT CTTCTTCTTC 931
SIMLO15_ROOT ACCTGAAGAT CAATTCTTTT GGTTTGGAAA ACCCAAATT CTTCTTCTTC 1180
SIMLO15_FLOWER ACCTGAAGAT CAATTCTTTT GGTTTGGAAA ACCCAAATT CTTCTTCTTC 825
SIMLO15_FRUIT ACCTGAAGAT CAATTCTTTT GGTTTGGAAA ACCCAAATT CTTCTTCTTC 809

                                4,560                                4,580                                4,600
gDNA_Solyc02g077570 TCATGCATTT CATCCTCTTT CAGGTA CTAC TATTTTAATT TTCACCTCTT 4596
cDNA_Solyc02g077570 ----- 951
SIMLO15_LEAF TCATGCATTT CATCCTCTTT CAG----- 954
SIMLO15_ROOT TCATGCATTT CATCCTCTTT CAG----- 1203
SIMLO15_FLOWER TCATGCATTT CATCCTCTTT CAGGTA CTAC TATTTTAATT TTCACCTCTT 875
SIMLO15_FRUIT TCATGCATTT CATCCTCTTT CAGGTA CTAC TATTTTAATT TTCACCTCTT 859

                                4,620                                4,640
gDNA_Solyc02g077570 TATTATTCAA TTCTATATTT ATATACTTAT TCATTTCAAT TCGTTATTTT 4646
cDNA_Solyc02g077570 ----- 951
SIMLO15_LEAF ----- 954
SIMLO15_ROOT ----- 1203
SIMLO15_FLOWER TATTATTCAA TTCTATATTT ATATACTTAT TCATTTCAAT TCGTTATTTT 925
SIMLO15_FRUIT TATTATTCAA TTCTATATTT ATATACTTAT TCATTTCAAT TCGTTATTTT 909

                                4,660                                4,680                                4,700
gDNA_Solyc02g077570 TCGAAAAAAA AAATCTTCAG AACTCGTTTC AGTTGGCATT TTTTGCATGG 4696
cDNA_Solyc02g077570 ----- AACTCGTTTC AGTTGGCATT TTTTGCATGG 981
SIMLO15_LEAF ----- TACAATTATG GGTTA--AAT TCTTGC TTCC 982
SIMLO15_ROOT ----- 1203
SIMLO15_FLOWER TCGAAAAAAA AAATCTTCAG AACTCGTTTC AGTTGGCATT TTTTGCATGG 975
SIMLO15_FRUIT TCGAAAAAAA AAATCTTCAG AACTCGTTTC AGTTGGCATT TTTTGCATGG 959

                                4,720                                4,740
gDNA_Solyc02g077570 AC-----AAC GGTAAGCGTT ATGAT-----TT 4718
cDNA_Solyc02g077570 AC-----AAC GGTAAGCGTT ATGAT-----TT 1003
SIMLO15_LEAF ACCATAAAAC AGTAGATATT GTGAC AAGGC TTGTTATGGG AGTGCTTGTT 1032
SIMLO15_ROOT ----- 1203
SIMLO15_FLOWER AC-----AAC GGTAAGCGTT ATGAT-----TT 997
SIMLO15_FRUIT AC-----AAC GGTAAGCGTT ATGAT-----TT 981

                                4,760                                4,780                                4,800
gDNA_Solyc02g077570 TATGTTATTT ATATAAGCTA TTGAATCCCC TTGATATAT- ----- 4757
cDNA_Solyc02g077570 ----- 1042
SIMLO15_LEAF CATTTCCTTT GTGGATA-TG TCATATTGCC TTTATATGCT CTCCTTACTC 1081
SIMLO15_ROOT ----- 1203
SIMLO15_FLOWER TATGTTATTT ATATAAGCTA TTGAATCCCC TTGATATAT- ----- 1036
SIMLO15_FRUIT TATGTTATTT ATATAAGCTA TTGAATCCCC TTGATATAT- ----- 1020

```

```

                                4,820                                4,840
gDNA_Solyc02g077570 -----ATGA ATTGA----- 4766
cDNA_Solyc02g077570 -----ATGA ATTGA----- 1051
SIMLO15_LEAF AGATGGGAAC CAAAATTAAA AGTAGTGTTT TGA CTGATGA AATGATTAGT 1131
SIMLO15_ROOT -----ATGA ATTGA----- 1203
SIMLO15_FLOWER -----ATGA ATTGA----- 1045
SIMLO15_FRUIT -----ATGA ATTGA----- 1029
                                4,860                                4,880                                4,900
gDNA_Solyc02g077570 -----AGATCGA----- 4773
cDNA_Solyc02g077570 -----AGATCGA----- 1058
SIMLO15_LEAF AGGCTAAAAA GATGGCAAGA AAAAGCAAAG AGGAAATTGG CTAAAAGAAG 1181
SIMLO15_ROOT -----AGATCGA----- 1203
SIMLO15_FLOWER -----AGATCGA----- 1052
SIMLO15_FRUIT -----AGATCGA----- 1036
                                4,920                                4,940
gDNA_Solyc02g077570 -ACTTACTTA TCAAA-----TATTATT TCAACAAATA TCA----- 4807
cDNA_Solyc02g077570 -ACTTACTTA TCAAA-----TATTATT TCAACAAATA TCA----- 1092
SIMLO15_LEAF CAATTACTTG TTAGCACAAA ATTTATTATC TTTAAATATT TCACCATCTT 1231
SIMLO15_ROOT -----TATTATT TCAACAAATA TCA----- 1203
SIMLO15_FLOWER -ACTTACTTA TCAAA-----TATTATT TCAACAAATA TCA----- 1086
SIMLO15_FRUIT -ACTTACTTA TCAAA-----TATTATT TCAACAAATA TCA----- 1070
                                4,960                                4,980                                5,000
gDNA_Solyc02g077570 -----AACTTA ATTAGC----- 4819
cDNA_Solyc02g077570 -----AACTTA ATTAGC----- 1104
SIMLO15_LEAF TTGAAACTTC ATTGGATGTT ACATATTTAT CAACCGATAC TGAAAATGAT 1281
SIMLO15_ROOT -----AACTTA ATTAGC----- 1203
SIMLO15_FLOWER -----AACTTA ATTAGC----- 1098
SIMLO15_FRUIT -----AACTTA ATTAGC----- 1082
                                5,020                                5,040
gDNA_Solyc02g077570 -----ATTT TAAATAA-----G 4831
cDNA_Solyc02g077570 -----ATTT TAAATAA-----G 1116
SIMLO15_LEAF GGAGAAATTG TAGATGATCA GAGACAAATT CAGCAACACA CAGAATTTGG 1331
SIMLO15_ROOT -----ATTT TAAATAA-----G 1203
SIMLO15_FLOWER -----ATTT TAAATAA-----G 1110
SIMLO15_FRUIT -----ATTT TAAATAA-----G 1094
                                5,060                                5,080
gDNA_Solyc02g077570 ATTCCTTA-----ACTAA 4843
cDNA_Solyc02g077570 ATTCCTTA-----ACTAA 1128
SIMLO15_LEAF ATCTTTGGT GGATTTCACT TGAGTAAATC TAGAGCAGCA CAACATTAG 1380
SIMLO15_ROOT -----ACTAA 1203
SIMLO15_FLOWER ATTCCTTA-----ACTAA 1122
SIMLO15_FRUIT ATTCCTTA-----ACTAA 1106

```
