# Supplementary material for: Genome-Wide Study of the Tomato SlMLO Gene Family and Its Functional Characterization in Response to the Powdery Mildew Fungus Oidium neolycopersici
Source: PubMed Central journal article supplement (PMC4986958; doi:10.3389/fpls.2016.00380), 2016-04-06
Supplement: DataSheet3.pdf [file DataSheet3.pdf]

## Genome-wide study of the tomato *SIMLO* gene family and its functional characterization in response to the powdery mildew fungus *Oidium neolycopersici*

### Supplementary material

**Supplementary Fig. 1 (.pdf)** Sequence alignments of *SIMLO* homologs cloned from different tissues of the tomato cv. Moneymaker showing deviating transcripts when compared with the predicted CDS sequence, as inferred by the SGN database, against their respective genomic regions. Deviating transcripts are identified for *SIMLO1* in flower, *SIMLO5* in fruit, *SIMLO6*, *SIMLO7*, *SIMLO8* and *SIMLO9* in leaf, *SIMLO10* in fruit, *SIMLO11* in root, *SIMLO13* in leaf and *SIMLO15* in all the tissues investigated. Alignments were obtained with default parameters by the CLC sequence viewer software. This legend corresponds to the file named Data Sheet 1 that can be downloaded on the right-hand side of the article abstract.

**Supplementary Fig. 2 (.pdf)** Sequence alignment of a set of 37 MLO proteins cloned from four tissues (leaf, root, flower and fruit) of the cv. Moneymaker. When no deviating transcripts were detected, the translated nucleotide sequence of leaf was used in the alignment, with the exception of *SIMLO12* which was cloned only from flower. Shading was obtained by feeding the alignment, obtained with default parameters by the CLC sequence viewer software, to the online server BoxShade (<http://sourceforge.net/projects/boxshade/>) and setting as 0.7 the fraction of sequences that must agree for shading. In black shade, the amino acids fully conserved, in gray the amino acids substitutions which are predicted to have similar biochemical properties and in red the amino acids identified by Elliot et al., 2005 as invariable for the whole MLO protein family. Transmembrane domains are indicated as inferred by the TMHMM online server (<http://www.cbs.dtu.dk/services/TMHMM/>) fed with the *SIMLO1* protein sequence of leaf. This legend corresponds to the file named Data Sheet 2 that can be downloaded on the right-hand side of the article abstract.

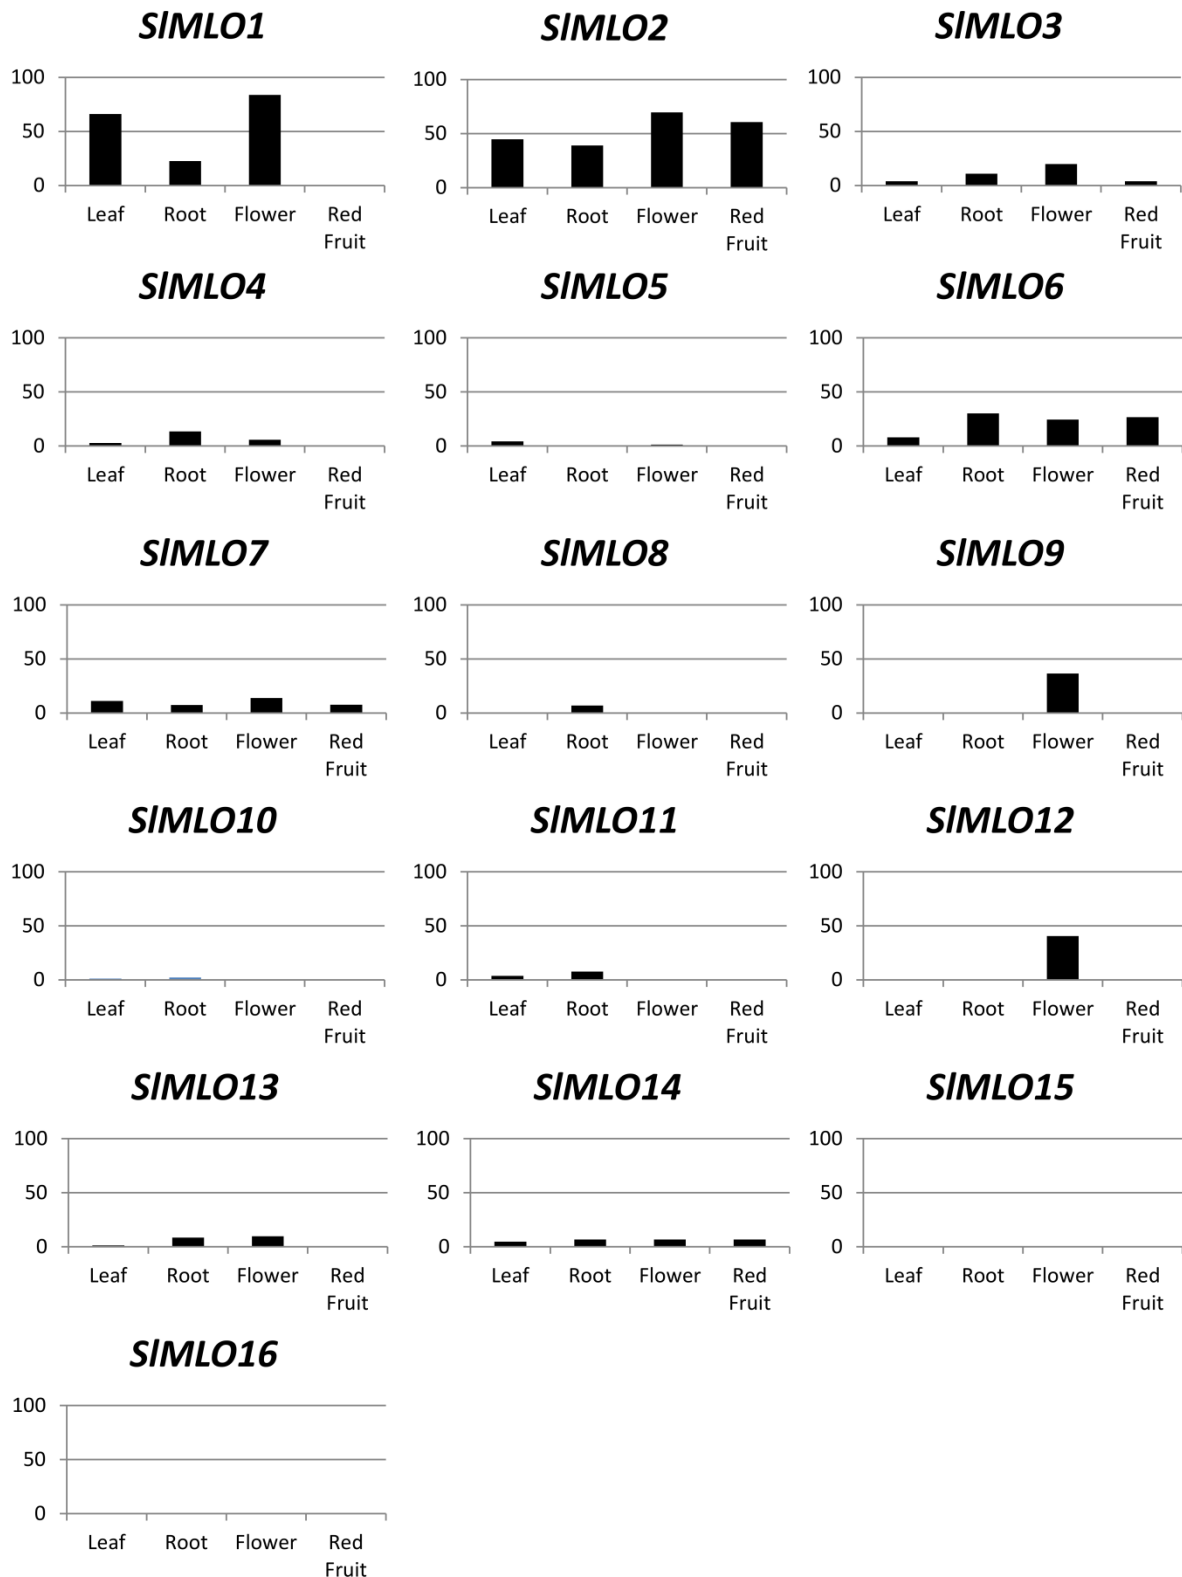

**Supplementary Fig. 3** FPKM values (fragments per kilobase of exon per million fragments mapped) depicted as columns for each of the four tissues investigated in this study obtained from the RNA-seq data of each of the 16 *SIMLO* homologs as reported by the SGN database.

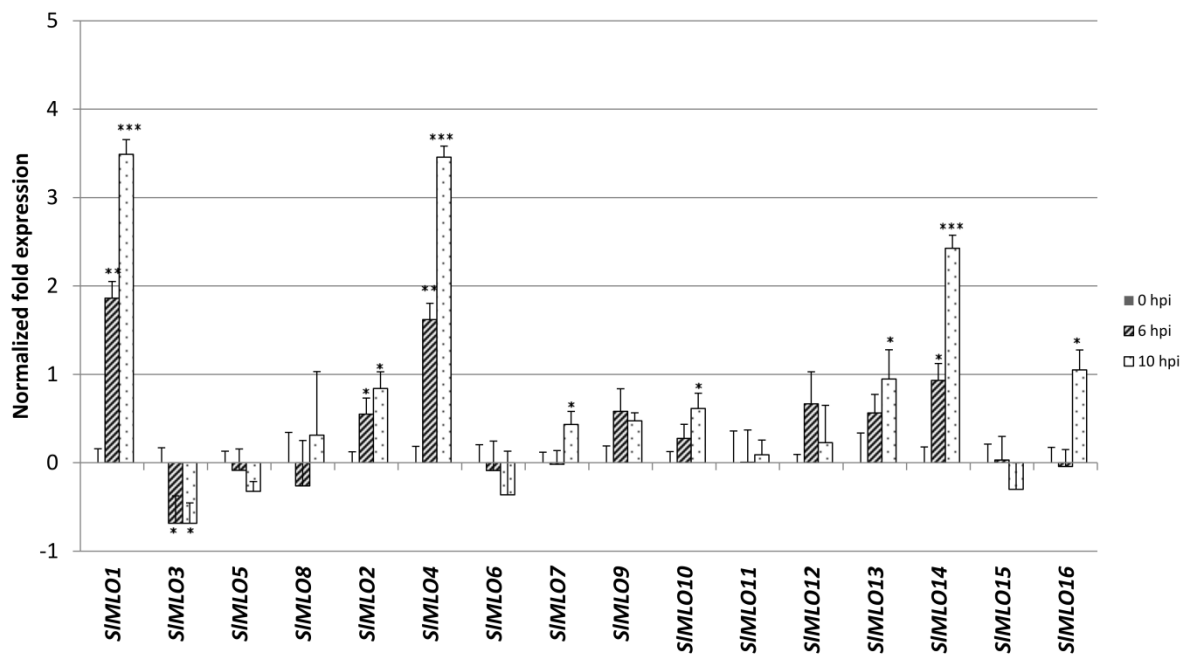

**Supplementary Fig. 4** Relative expression level of the *SIMLO* gene family members in response to *O. neolyopersici* infection. Samples were collected at 0, 6 and 10 hrs after inoculation (hpi). Transcript levels of each *SIMLO* homolog were normalized against the transcription level of *Ef1 $\alpha$*  as reference gene. Bars show standard errors based on four biological replicates. Asterisks refer to significant differences with respect to non-inoculated plants (0 hpi), inferred by mean comparisons with a Student's t-test (\*  $p < 0.05$ , \*\*  $p < 0.01$ , \*\*\*  $p < 0.001$ ).

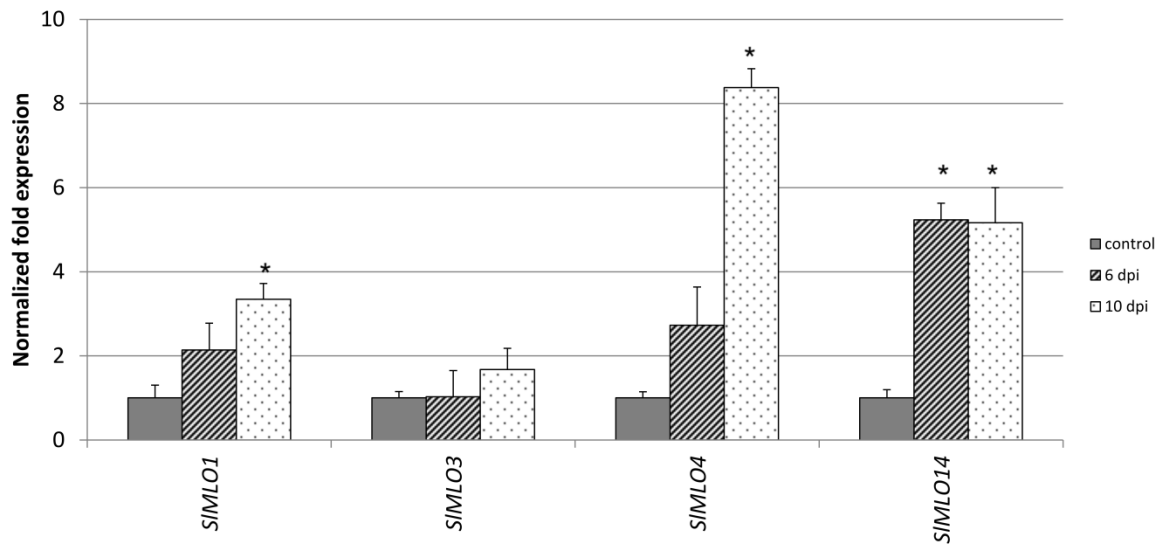

**Supplementary Fig. 5** Relative expression level of *SIMLO1*, *SIMLO3*, *SIMLO4* and *SIMLO14* compared to the reference gene *Ef 1 $\alpha$*  upon inoculation with *O. neolycopersici*. Means are calculated from duplicate technical measurements. Bars show standard errors based on three biological replicates. Asterisks refer to significant differences with respect to non-inoculated plants used as control (0 hpi), inferred by mean comparisons with a Student's t-test (\*  $p < 0.05$ ).

SlM1o3 1 ATGGCCGGTGGTGGTGGTGGTGGGAAGAT-----CGTTGGAGCAAAGCCAACT  
 SlM1o8 1 ATGGCGGGAGGAGGAGGAGG---AAGAT-----CGTTGGAGCAAAGCCGACG  
 SlM1o1 1 ATGG-----AGGCAACCCCTACG  
 SlM1o5 1 ATGGCTAGCACAGGCTGTATTAGAAGCTGTGATGAACGTCCTCTAGATGAGACACCAACA

SlM1o3 49 TGGGGGGTTGCCGTTGTTTGTGTTTGTGTTAGTTGCAATACTATTGTCATTGAACATATT  
 SlM1o8 46 TGGGGGGTTGCCCTAGTTTGTGTTTGCATTGGTTGCCATTCCATTGTAATAGAGCTCATC  
 SlM1o1 19 TGGGCAATTGCTGTGGTTTGTTCATCTTGGTCGCTATTTCATATTTTATTGAACAAATT  
 SlM1o5 61 TGGGCTGTAGCCATGGTTTGTGTTTGTATTAGTTGTAATCTCCCTTTTCATTGAACAACTT

SlM1o3 109 ATCCACCTTATTGGAAAGTGGTTGAAGTCTAAAAATAAAAGTGCCCTTATGAAGCACTT  
 SlM1o8 106 ATCCATCTTATTGGCAAGTGGTTGAAGTCTAAACATAAAAAGACATTTATGAAGCACTT  
 SlM1o1 79 ATTCATCACATTGGAGAGTGGTTACTGAAAAGCGGAAAAGTCTCTATATGAAGCACTT  
 SlM1o5 121 ATTCATCATCTTGGAGAGTGGTTATGCAAGAACAAAAGAGACATTTATGAAGCACTT

SlM1o3 169 GAAAAGATCAAAGCAGAGCTTATGCTGCTGGGATTCATATCATTGTTGTTAACAGTAGGA  
 SlM1o8 166 GAGAAGATAAAAGCAG-----TAGGG  
 SlM1o1 139 GAAAAGATCAAAGCTGAAGCTTATGCTGTTGGGATTCCTATCACGTGTTGTTGACAGTGTG  
 SlM1o5 181 GAGAAGATCAAGTCAGAACTCATGTTATTAGGGTTTATATCCTTATTCTTGACGGTTGTA

SlM1o3 229 CAAAGTCCAAATTCGAACATATGTGTATCAGAAAAATTAAGAAATTCATGGCATCCATGT  
 SlM1o8 187 CAAGATCCAAATTCAAAATATTTGTGTATCTGAAAAAATTCGAAGTACCTGGCATCCATGT  
 SlM1o1 199 CAAGATCCAGTTTCTAACTTATGTGTCCCAAGAGTGTGGTTATTCTGGCATCCATGT  
 SlM1o5 241 CAGGATCCATGTCTAAGATATGTATTCCTAGGAGTGTTCGACGCTCTGGCATCCATGT

SlM1o3 289 AGTAAAAAAGAAAGAGATAGTA-----GTATAATTTCAGAAGATTCGTTGTCGGAGCA  
 SlM1o8 247 AGTAAACAAAAAGAAAGCTGAAATGAACAAATATATTTCCGGTGACTT-----AGAGGG  
 SlM1o1 259 ATGGCAAAGGAAAGATGCCAAG-----  
 SlM1o5 301 GACATAAACAAACATATTGAT-----

SlM1o3 342 ACACCGCCGGAGACTTCTTATGGATGCTGCCGGCGGTGGCGTACGACGAAATATGGCTGG  
 SlM1o8 300 TCATCGCCGGGACTTTTCACGG---CTGACGATGGCGGAGTCCGGCCAGTTTGGCGGC  
 SlM1o1 280 -----TCTCAGTAT-----  
 SlM1o5 322 -----GACCAATAT-----

SlM1o3 402 TGGTGGTGGAGATGACAAAATGTGCAGCAAAGGGAAAAGTACCATTGTGTCTGCTGATGG  
 SlM1o8 357 TGCCGG---AACTGACAAAATGTGCAGCAAAGGGAAAAGTACGATTGTGTCTGCTGATGG  
 SlM1o1 289 -----GATGACCTTGTCTACCAAGGGAAAAGTGCATTTGCATCTTCATATGC  
 SlM1o5 331 -----CTCGATCCATGTAGAAATTAAAGGGAAAAGTCCAATTGTCTTCAAATATGC

SlM1o3 462 AATTCATCAATTACACATTTTCATCTTTGTGCTGGCTGTATTTTCATGTCCTCTATTGTGT  
 SlM1o8 414 TATTCATCAATTACATATTTTCATTTTGTGCTGGGTATTTTCATGTATTTTATTGTGT  
 SlM1o1 339 AATACACCAGCTCCATATCTTCATCTTTGTATTTGGAGTTGCTCATGTATTGTACTGTAT  
 SlM1o5 381 AATTCACCAACTCCACATTTTATCTTTGTGTTAGCCGTTGCACATGTGTTGATTGTAT

SlM1o3 522 TACAACTTTGCCTTTGGGAGAGCTAAGATGAGAAGTTGGAAGTCATGGGAAAATGAAAC  
 SlM1o8 474 TACCACATTGGCATTGGCAAGAGCTAAGATGAGTCGTTGGAAGATATGGGAAAAGGAAAC  
 SlM1o1 399 AGCAACTTTGCCTTTGGGAGGCTAAGATGAGAAAATGGAGGGCATGGGAGGATGAAAC  
 SlM1o5 441 TACCACCTTTGGGAATTGCCAAACTAAGATGAGGACATGGAGAGCTTGGGAGGATGAATC

SlM1o3 582 TAAAACAGCTGAATACGAATTTCTCACGATCCTGAAAGATTTGATTACAGAGAAAC  
 SlM1o8 534 AAGAACAGCTGAGTACCAATTTCTCATGATCCAGAGAGATTTGATTGCTAGAGATAAC  
 SlM1o1 459 AAAAAAATGGAGTACCAATTTTACAAACGACCCCTGAGAGATTCAGATTTGCAAGGGAGAC  
 SlM1o5 501 TAAAACAATTGAATACCAATTTTATAACGATCCTGAGAGATTTGATTGCAAGAGAAAC

S1M1o3 642 ATCA**TTTGG**AAGAA**GCAC**TTGAGCTTT**TGG**ACCA**AAAA**ATCCTCT**CT**ACTTT**GG**ATCGT  
 S1M1o8 594 ATCA**TTTGG**AAGAA**GCAC**TTT**CG**AGTT**TTT**TGACT**AAAA**ATCAGTTCT**TCT**ATGGAT**TGT**  
 S1M1o1 519 C**TCG**TTT**GG**AC**GT**AG**GC**ATTT**GC**ATTT**CT**GGAG**CA**AGT**CCC**CCGT**GT**T**CT**CT**CG**AT**AGT**  
 S1M1o5 561 ATCA**TTTGG**AC**GT**AA**CA**TT**TC**ATTT**CT**GGAG**CA**ACT**CT**CCA**AT**CT**TCT**CT**GG**AT**AGT**

S1M1o3 702 **TTG**TTCT**T**AG**GC**AA**TT**T**G**TAAG**AT**CT**GT**CC**AAAA**AGT**TG**ATT**ACT**TA**CA**CT**T**AG**GC**A  
 S1M1o8 654 **TTG**TTCT**T**CA**GC**AA**TT**T**G**TAAG**AT**CT**GT**CC**AAAA**AGT**TG**ATT**ATT**T**CA**CC**T**TAC**GC**A  
 S1M1o1 579 **TTG**TTCT**T**CG**GC**AA**TT**CT**T**CT**CA**CT**AG**TT**G**CA**AAA**AGT**TG**ACT**ATT**TA**AC**CT**T**AG**GC**A  
 S1M1o5 621 **TTG**TTCT**T**CA**GC**AG**TT**CT**AT**GC**AT**CA**GT**T**G**AA**AAA**AGT**AG**ACT**AT**CT**T**ACC**CT**T**AG**GC**A**

S1M1o3 762 **TGG**ATT**TAT**T**AC**GCACATTT**AG**CACCACAGAGCCAC**CAAAA**ATTTGATTT**CCG**AAAGTA  
 S1M1o8 714 **TGG**TT**TAT**CA**CC**-----  
 S1M1o1 639 **TGG**TT**CA**T**GA**T**GC**ACATTT**AA**CTCCAC**AAA**AT**CAAAA**TAATTTT**GAT**TT**CA**ATTATA  
 S1M1o5 681 **TGG**CT**TG**CT**AT**GCACATTT**AG**CAC**CT**CAGCA**AGAAA**GAATTTT**GAT**TT**CA**ATT**GTA**

S1M1o3 822 CATTAA**AC**GATCACTT**GA**AGAAGATTT**TA**AGTGGTT**G**TAGGAAT**CA**T**CC**CC**CA**AT**AT**G  
 S1M1o8 727 -----**TCC**AC**CA**AT**TT**G  
 S1M1o1 699 CATTAA**CA**GAG**CA**GT**TG**CA**AA**AGACT**TC**AAAGT**TG**T**G**T**G**GAATA**AG**T**CC**CT**GC**AT**AT**G  
 S1M1o5 741 TATA**AA**TAGAG**CA**CTT**GA**AGAAGATTT**TA**AGAT**G**TT**G**TGGGA**ATA**AG**TCC**ACT**GT**AT**G**

S1M1o3 882 **G**TT**CT**CG**CG**T**CT**CT**T**ACT**CT**TT**A**ACT**CA**T**GG**CT**GG**TA**TT**CT**AT**CT**T**GG**CT**  
 S1M1o8 739 **G**TT**CT**TT**GC**-----**TGG**TA**TT**CT**AT**CT**GT**GG**CT**  
 S1M1o1 759 **G**CT**CT**CA**CG**GT**G**CTATATTT**CT**GACTACTAC**CG**AT**CG**AT**TG**TACT**CG**TA**CT**TT**GG**GT  
 S1M1o5 801 **G**AT**GT**TT**GC**AGT**CT**CTACTTT**CT**CACTACTAC**CA**AT**GG**TT**GG**TA**TT**CA**TA**CTAT**GG**CT

S1M1o3 942 ACC**AT**TCAT**CC**CT**T**GA**TT**T**G**T**CA**TAT**TAT**AGT**AG**GG**CA**AA**AG**CT**ACA**AG**TG**ATA**ATA**AC  
 S1M1o8 768 ACC**GT**TCAT**CC**GT**T**ACT**T**GT**CA**TAT**TAT**AGT**AG**GG**CA**TA**AA**CT**ACA**AG**TG**ATA**ATA**AC  
 S1M1o1 819 **CC**AT**TT**AT**CC**ACT**TG**TA**AT**AT**AT**T**CT**AGT**TG**CC**AC**AA**AA**CT**CA**AA**TG**AT**CA**TA**AC**  
 S1M1o5 861 **CC**CT**TC**AT**CC**TT**AA**TT**ATA**AT**AT**TACT**CT**GT**GG**CA**CA**AA**AA**TT**ACA**AG**TG**ATA**ATA**AC

S1M1o3 1002 **AAAA**ATGGG**CT**TAAG**G**AT**TC**AT**G**AAAG**AG**GAG**AA**CT**AG**T**AAA**AG**GG**TAC**CT**GT**GG**TT**CA**  
 S1M1o8 828 **AAAA**ATGGG**AT**TAAG**A**AT**TC**AA**G**AAAG**GG**GAG**AA**CT**AG**T**AAA**AG**GG**TAC**CT**GT**GG**TT**CA**  
 S1M1o1 879 **AG**AA**AT**GGG**AG**TAAG**G**AT**TC**AG**AA**AG**GG**GAG**ACA**TA**GT**AAA**AG**GT**TG**AC**CT**GT**GG**T**GGA**  
 S1M1o5 921 **AAAA**ATGGG**AT**TAAG**G**AT**AAA**G**AA**AG**GG**GAG**ACA**TT**GT**AAA**AG**AA**CA**CC**AT**AG**TTGA**

S1M1o3 1062 **G**CC**AG**GAG**AT**CA**CC**TT**TT**T**G**GT**CA**AC**CG**TC**CT**CG**T**CT**CA**TT**CT**TAT**CT**TAT**TA**ACT**T**  
 S1M1o8 888 **AC**CT**GG**AG**AT**GA**TT**TAT**TT**T**G**GT**TT**AA**TC**GT**CT**CG**T**CT**ACT**ACT**TT**TT**TT**TAT**TA**ACT**T**  
 S1M1o1 939 **GA**CT**GG**T**G**AC**CA**T**CT**TT**CT**GG**TT**AA**TC**GC**CT**G**CC**CT**GT**CT**AT**T**CT**T**G**AT**TA**ACT**T**  
 S1M1o5 981 **AC**CA**GG**GG**AT**GA**TC**TT**TT**T**G**GT**TT**AA**TC**GT**CT**GA**TC**TT**TG**CA**CT**CT**CT**CA**TT**CA**CT**T

S1M1o3 1122 **TG**TT**CT**CT**TT**CAG**AA**T**GC**TT**TT**CA**GT**T**GC**CT**CT**TT**TG**CT**TG**GA**CT**T**GG**TAT**GA**AT**TT**GG  
 S1M1o8 948 **TG**TT**CT**CT**TT**CAG**AA**T**GC**TT**TT**CA**AT**T**GC**CT**CT**TT**TG**CT**TG**GA**CT**T**GG**TAT**GA**AT**TT**GG  
 S1M1o1 999 **TG**TACT**CT**CT**TT**CAG**AA**T**GC**TT**TT**CA**AG**TT**GC**TT**CT**TT**TT**T**G**GA**GT**T**GG**T**GG**AA**AT**TT**GG**  
 S1M1o5 1041 **TG**TT**CT**CT**TT**CAG**AA**T**GC**AT**TA**CA**ACT**T**GC**TT**CT**TT**TG**CT**TG**GA**CT**T**GG**T**GG**AA**AT**TT**AA**

S1M1o3 1182 **GT**T**G**AA**AT**CT**TG**TT**AC**CA**TG**CA**CT**ACT**G**AG**G**ATA**TT**T**G**T**CA**T**CA**GA**AT**T**AC**AT**TG**GG**GG**GT  
 S1M1o8 1008 **G**CT**G**AA**AT**CT**TG**TT**CC**AT**G**CA**CA**ACT**G**AG**G**ACA**TC**GT**AA**TT**G**AA**AT**G**ACA**AT**TG**GG**GG**GT  
 S1M1o1 1059 **TT**T**CC**AT**CT**T**GC**TT**CA**TA**GA**AT**GC**T**GC**AG**AC**CT**AG**CC**ATA**AG**GC**TA**AC**CA**TG**GG**GG**GT  
 S1M1o5 1101 **TT**T**AC**CA**CT**T**TG**CT**TC**CA**CA**AA**AT**T**G**TA**AC**AG**ACA**T**AG**CC**ATA**CA**CT**TT**CC**AT**TG**GG**GG**CT

S1M1o3 1242 **CT**CA**TT**CA**GAT**CT**TG**TCAG**T**AT**GT**CA**CT**CT**CT**CT**TT**AT**GC**CT**TT**GT**G**ACA**CAG**AT  
 S1M1o8 1068 **T**CT**T**AT**TC**AG**AT**CT**TT**T**G**CA**GT**AT**GT**TACT**CT**CC**AT**TA**TAT**GC**TCT**T**G**T**AC**AC**CAG**AT  
 S1M1o1 1119 **G**AT**CA**T**AC**AG**GT**CC**AT**T**G**CA**GT**AT**GT**GACT**CT**CC**CT**CT**TT**AT**GC**CT**T**AG**TT**AC**CAG**AT  
 S1M1o5 1161 **T**CT**CA**TT**CA**AG**TT**CT**TT**T**G**CA**GT**AC**CT**G**AC**ACT**CC**CC**ATA**T**AT**GC**CT**T**AG**TT**ACT**CAG**AT**

```

SlMl.o3 1302 GGGTTCAAACATGAAATCAACTATCTTCAATGAAAAGAGTAGCAACAGCATTGAAGAATTG
SlMl.o8 1128 GGGATCAACAATGAAACCAACAATCTTCAATGAAAAGAGTAGCAATGGCATTGAGAAAATG
SlMl.o1 1179 GGGTTCAATCAATGAAAGCCTATCATCTTTGGTGATAATGTGGCAACAGCCTTAGAAGCTG
SlMl.o5 1221 GGGATCAACAATGAAACAGTTATCTTTGGTGACAACGTGCCATACGGCATACCGACATG

SlMl.o3 1362 GCACCAACAGCAAGCAAGAACATGT--AAAGGATCAA--AGCAAACATTTAATCCAGTGAC
SlMl.o8 1188 GCACCAATAGTGCCAAAAACACATCAAGAGATCAACAAGCAACACTCAAATCCAACAAC
SlMl.o1 1239 GCACCATTCAGCCAAAAAACGGGTGAAAC-----ATGGGC---TATCAGGACATACCAC
SlMl.o5 1281 GCATTCAGCAGCAAGCAAGCAAGCAAGCAAGCAAGCAAGCAAGCAAGCAAGCAAGCAAGCAAG

SlMl.o3 1419 ACCAATGTCAAGTAGACAGGGACACCTTCTCATCATGGCATGTCACCGTGCATTATT
SlMl.o8 1248 ACCAATGTCAAGTAGGGCAACCACTCCCTCTCAC---GGCATGTCACCGTCCATCTCCT
SlMl.o1 1290 CCCTGCAAACAGCAGACCAACCAACACCATTTGGT---GGTACCTCCCTGTTCACTTATT
SlMl.o5 1335 TCCAGTGAGAGCAGGGCAGTGTCAACATTGGCT---GGAGGTCCTCTC-----

SlMl.o3 1479 GCGCGGACATTATAGGAGTGTATGGGCA---GTCTACAAAACCTCACCTCGTAGATCAAA
SlMl.o8 1305 ACGCGGTATCAGGACGAGTGCATGGACGTGGGTCCAAGAGATCGACCTATA-----
SlMl.o1 1347 ACGCGGTTATCCACAATATAATGAGGACA---GTGTTCAAGCACTCTCCTCGGACATC---
SlMl.o5 1382 -----CGGTTCAAAAAACA---CGGGCAATTATATCTCCATCACC---

SlMl.o3 1536 CTACGATTTGATCATTCGGACAACGAGGGCTCACCTTACCCTCCCGGTTTTTACAGGA
SlMl.o8 1358 --ATAATATAGACCATTCGGATATTGAGGGCTCACCATCTCCAATCG-----TCAGGA
SlMl.o1 1401 -----CAATG---TCGAAAATGAAAGGTGGGCTAATGAAAA-----TCAGGA
SlMl.o5 1422 -----TAATCCTTCGCGTAGGAGAGTGG---AGGTAAT-----CCAGGA

SlMl.o3 1596 GGCTTTTGATGGCTCATTGCACCATATTTCAACTTGGTCAATTGGACCATGAACTGCAACA
SlMl.o8 1410 CTCTC-----A
SlMl.o1 1440 GGGAC-----A
SlMl.o5 1459 TCGAC-----

SlMl.o3 1656 AGTTATTGAGCCTAATTCGTCAACAAGTGGTTCCTCTATCAACAAGGGTTCGCGACCAACA
SlMl.o8 1416 AGTTCACGAGCCTAATTTGTCAGAAATTG-----AGGCTCGTGAACAATA
SlMl.o1 1446 GATCCTGCAGC--ATGCCTCCACTGATCAT-----A--ACAAGCAA--
SlMl.o5 1464 --TTCTA-GCC--AAATCTTTGATGATGGA-----AGTCATGACCAATC

SlMl.o3 1716 TGAGATTACTATTCTTGGATCAAGAGATTTTTCGTTTGAGAAAAGAACAACCAAGTATATA
SlMl.o8 1461 CGAGATTAAATATCTCTGTTCAAGGATTTTCTTTTGATAAAAAGAAGCACTAGTGTATA
SlMl.o1 1483 ---ATTGAGATTAC---AATGTCAGATTTTACTTTTGGAAACAAAT-----A
SlMl.o5 1503 TGAAATTGAAATTAC---CTTGAATGATTTTCACTTGAAAACAATTAAGT-----TG

SlMl.o3 1776 G
SlMl.o8 1521 A
SlMl.o1 1524 A
SlMl.o5 1554 A

```

**Supplementary Fig. 6** Sequence alignment of the coding sequences of the four *SIMLO* homologs found in clade V, namely *SIMLO1*, *SIMLO3*, *SIMLO5*, and *SIMLO8*. The alignment was generated by CLC sequence view software using default parameter and given to BoxShade online server (<http://sourceforge.net/projects/boxshade/>) to allow the shading. The fraction of sequences that must agree for shading was set as 1. Black shade indicates nucleotides that are fully conserved among the four sequences. Regions of each homolog used for the RNAi construct are highlighted in yellow, light blue, green and pink for *SIMLO1*, *SIMLO3*, *SIMLO8*, and *SIMLO5* respectively. Primer pairs used to prepare each RNAi construct are listed in Supplementary Table 3.

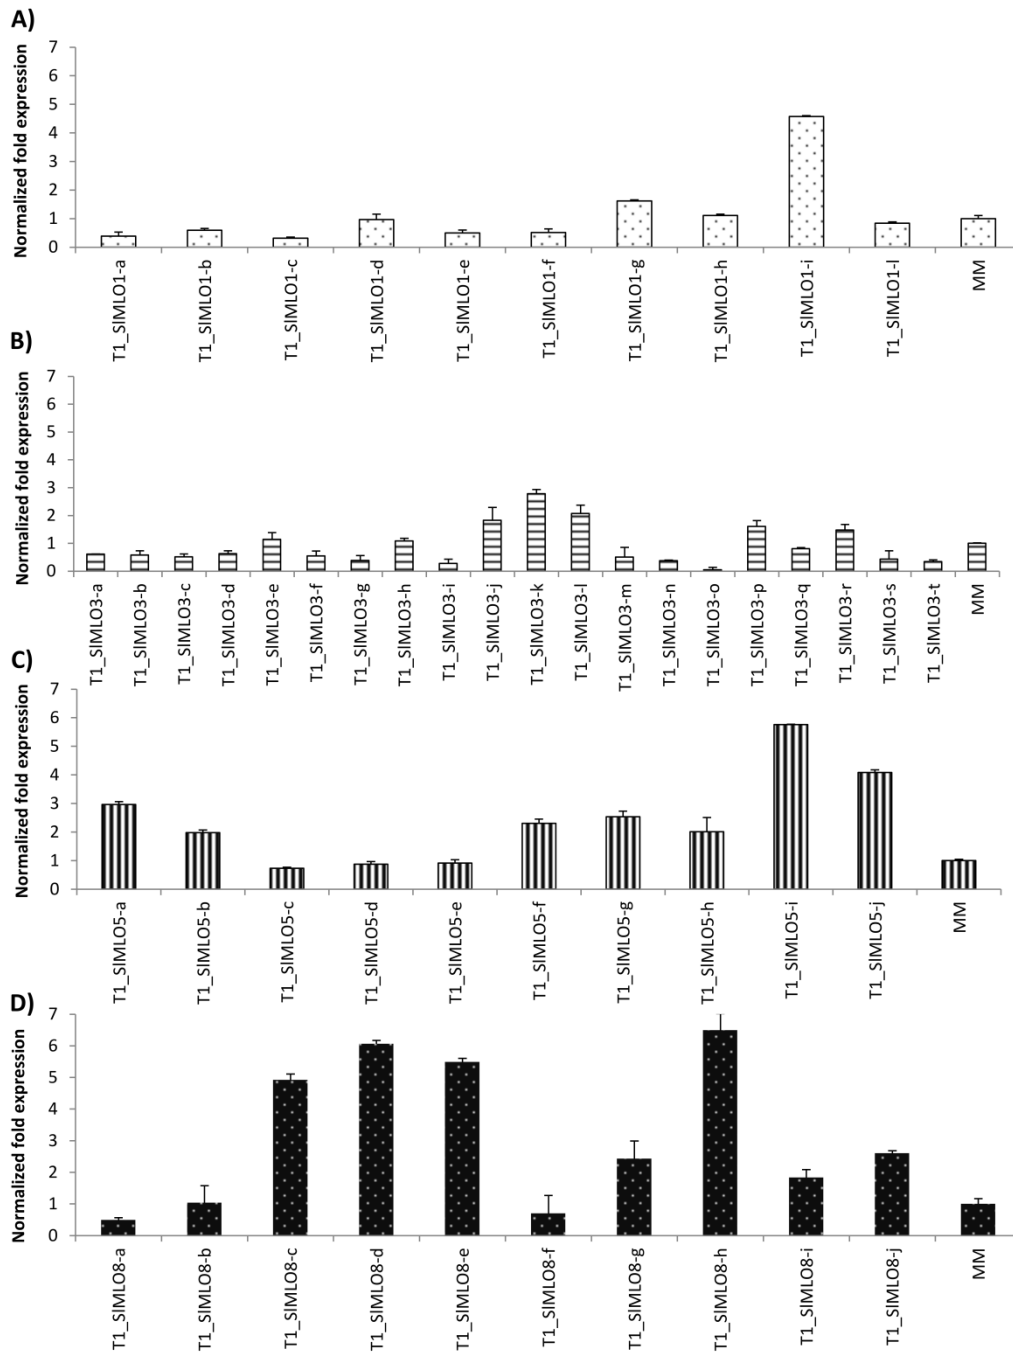

**Supplementary Fig. 7** Relative expression level of the target *SIMLO* gene in T<sub>1</sub> plants obtained with the RNAi silencing construct for *SIMLO1* (panel A), *SIMLO3* (panel B), *SIMLO5* (panel C) and *SIMLO8* (panel D), respectively. Bars shows standard error of three technical replicates.



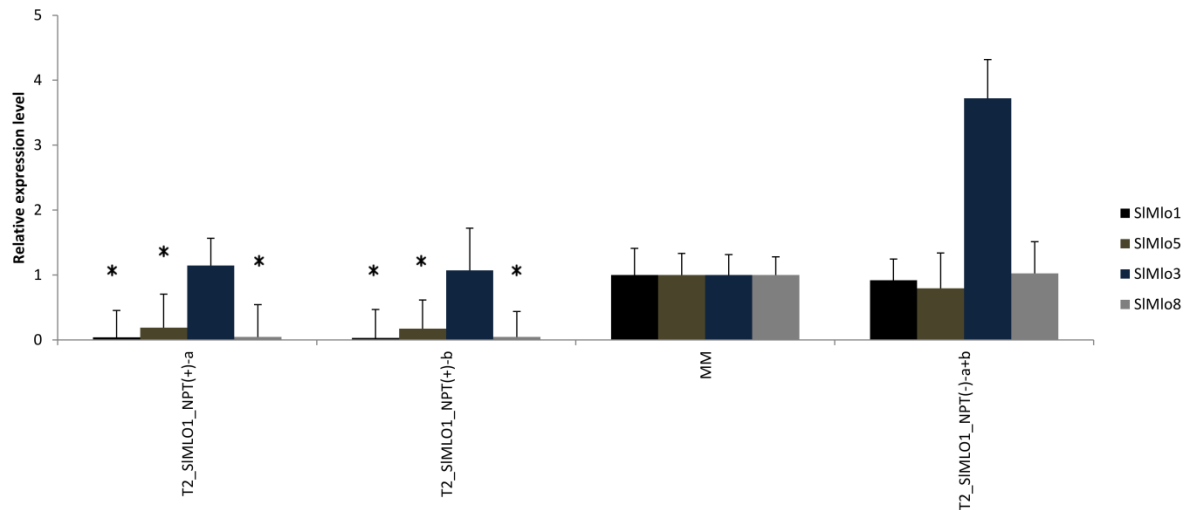

**Supplementary Fig. 8** Relative expression level of the clade V *SIMLO* genes in two T<sub>2</sub> families segregating for the RNAi construct designed to target *SIMLO1*. Bars show standard errors of four transgenic individuals T2\_SIMLO1\_NPT2(+)-a, four transgenic individuals of the T2\_SIMLO1\_NPT2(+)-b, four Moneymaker (MM) and four non-transgenic T2\_SIMLO1\_NPT2(-)-a+b plants (from both T<sub>2</sub> families). Asterisks refer to significant differences (\*  $p < 0.05$ ) with respect to the expression of the target gene in MM that was used as genetic background for the transformation.

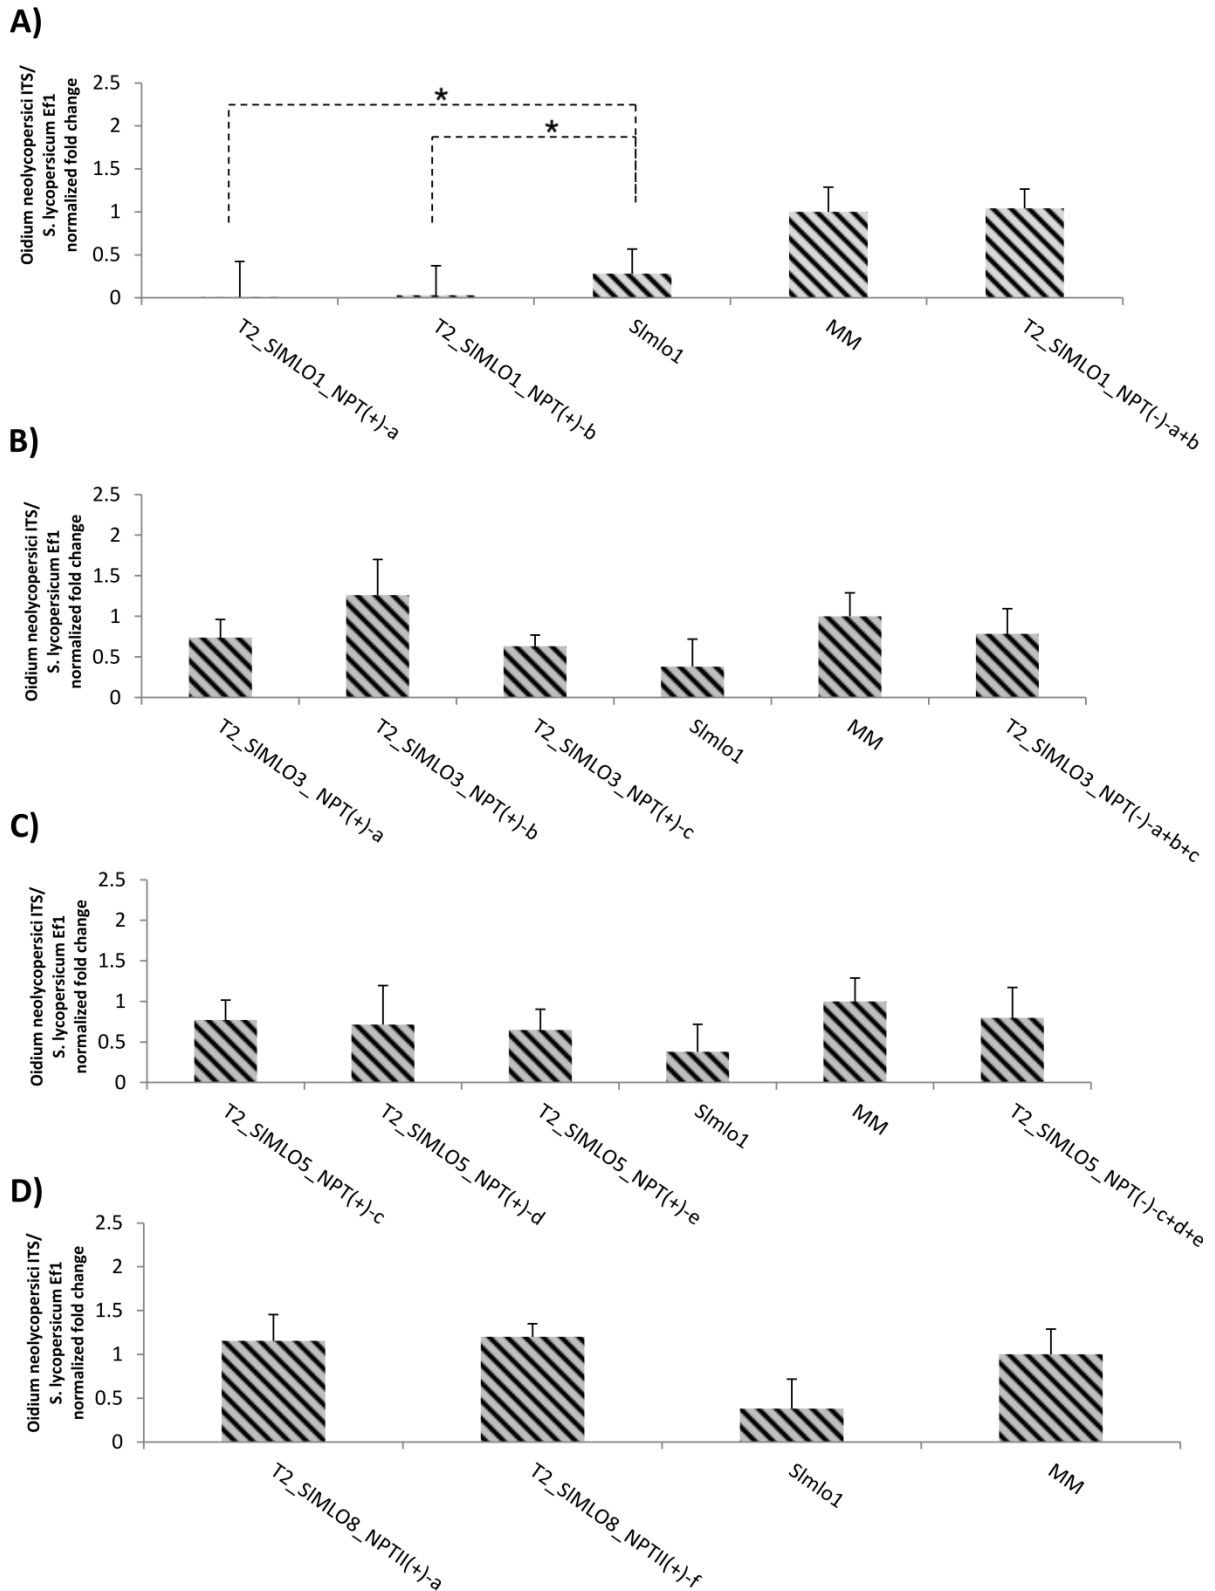

**Supplementary Fig. 9** Fungal biomass measured by relative quantification of the ratio between *Oidium neolycopersici* and plant gDNAs on independent T<sub>2</sub> families obtained with the silencing constructs targeting *SIMLO* genes of clade V. Panel A and panel D refer to the two T<sub>2</sub> families tested in this study obtained with the constructs designed to silence *SIMLO1*

and *SIMLO8*, respectively. Panel B and panel C refer to the three T<sub>2</sub> families obtained with the constructs designed to silence *SIMLO3* and *SIMLO5*, respectively. The *SIMLO* gene name and extension “a” to “f” of the T<sub>2</sub> families refer to the ones in Supplementary Fig. 7.

For MM and SImlo line in each panel, bars show standard errors based on 10 plants. In panel A, bars show standard errors of four transgenic plants (NPT+) for each of the two T<sub>2</sub> families (T<sub>2</sub>\_SIMLO1-a and -b) and four plants that do not carry the silencing construct obtained from the two T<sub>2</sub> families. Asterisks refer to significant differences compared to the SImlo1 line (\* p < 0.05; Student's t-test). In panel B, bars show standard errors of 10 transgenic plants of the T<sub>2</sub>\_SIMLO3-a and -b families, eight plants of the T<sub>2</sub>\_SIMLO3-c family and seven plants that do not carry the silencing construct obtained from the three families. In panel C, bars show standard errors of nine transgenic plants for each of the three T<sub>2</sub> families (T<sub>2</sub>\_SIMLO5-c, -d and -e) and six plants that do not carry the silencing construct obtained from the three families. In panel D, bars show standard errors of 10 transgenic plants for each of the two T<sub>2</sub> families (T<sub>2</sub>\_SIMLO8-a and -f). For these two T<sub>2</sub> families, we did not find plants without the NPTII marker.

**Supplementary Table 1. Primers pairs used to amplify and clone *SIMLO* homologs.** Primer pairs A and B were used to amplify overlapping fragments at the 5' and the 3' end of each gene, respectively. Successful amplifications were followed by assembly of the two products to obtain full-length sequences, which were submitted to the NCBI database and accession numbers are reported. Unsuccessful amplifications are indicated by the symbol ( - ).

| <i>SIMLO</i>   | Product A (bp)/ product B (bp) | Primer pair A(5'...3')                                   | Primer pair B (5'...3')                                  | Leaf     | Root     | Flower   | Fruit    |
|----------------|--------------------------------|----------------------------------------------------------|----------------------------------------------------------|----------|----------|----------|----------|
| <i>SIMLO1</i>  | 925 / 753                      | TTGACATTTCCCTTCTTCTTA/<br>CCCTTTCTGAAATCCTTACTCC         | TATTGCTAGTTGGCACAAAAC/<br>TACAAAATCATTGCCATTTGAA         | KU759512 | KU759511 | KU759510 | -        |
| <i>SIMLO2</i>  | 800 / 931                      | GAATCAACATAGTGTTCATCTT/<br>TCTAATTTGTGACAGATCCAAAG       | CGGTTTCTAGGATTTGGTAAAA/<br>TCCTTTACAGTCATAACAGCTTTG      | KU759516 | KU759515 | KU759513 | KU759514 |
| <i>SIMLO3</i>  | 1089 / 824                     | TCTGAGAAACAAGTTTGTAGTGA/<br>AACCACAGGTACCCCTTTACT        | AATAACAAAAATGGGGCTAAGG/<br>GAATATAGTATTAATGTGCTCCTTGTT   | KU759519 | KU759518 | -        | KU759517 |
| <i>SIMLO4</i>  | 1016 / 954                     | GCTTTCTCTGCATCTGAAAGTT/<br>AGATGTCAAGGCCATTCTTGT         | TTCCAAAAAGTATATCAAAAAGTTCAT/<br>GAAGAAGCAAGCCACTATTTCAG  | KU759520 | -        | -        | -        |
| <i>SIMLO5</i>  | 852 / 916                      | CTCTCACAAATTTCCCTTATCATT/<br>TAACCTTATTTCCCAACATCTTTA    | CAAGAAAAAGATTTTGTATTTTCAAT/<br>ATTTCAAAGGTAACACGTACAAGA  | KU759523 | -        | KU759521 | KU759522 |
| <i>SIMLO6</i>  | 402 / 311                      | TTCTGTTTCAAGAAGATGATGTAAG/<br>CAATATCACGAAATTTCTTCCTC    | TGCCATTAACCTTATGATTTCCA/<br>TGTCTAAGGTTGTGGATTCTGT       | KU759527 | KU759526 | KU759524 | KU759525 |
| <i>SIMLO7</i>  | 596 / 971                      | CATTTGTGAAGAAGAAGAAGAGTTT/<br>CACGAATCATGTACTTGTGAAAAT   | TTCTTTAAGCAATTTTATGGTTCTG/<br>GAATATGGTTCCTCAGAAGAGTTG   | KU759528 | -        | -        | -        |
| <i>SIMLO8</i>  | 978 / 998                      | TCTCATTAATTTCAATTTACGCTACG/<br>TAACGGAATGAACGGTAGCC      | TCCAGAGAGATTTCCGATTTGC/<br>AAGTGACTTTGCCACTCATGATA       | KU759529 | -        | -        | -        |
| <i>SIMLO9</i>  | 730 / 1077                     | CATATTTGCCTAATCCATGAAA/<br>GCTCCTCCAAATACAATAGTCAA       | TTGCATCACCTTCATGTTTTTA/<br>TGGTATACTGGATCATACTAACTTTT    | KU759532 | -        | KU759530 | KU759531 |
| <i>SIMLO10</i> | 857 / 1050                     | TGATACATCTGAAGCTGAAATACTG/<br>CCTCTTGATGTACTTTTGGAAAGTTA | TTTTTCAAGTCTGTCAGTAAGTCAG/<br>ACATTGATATGACTTGAGGGAAAAAG | KU759536 | KU759535 | KU759533 | KU759534 |
| <i>SIMLO11</i> | 511 / 850                      | TGTCTTTAATTCATCAAGACATGC/<br>ACCTCTTGAGCCAATTCTGTTA      | CTTCTAGTAGGAACAAAATTGGAG/<br>TTTAAAGAATAATGTATTGTTCATCCT | KU759540 | KU759539 | KU759537 | KU759538 |
| <i>SIMLO12</i> | 972 / 982                      | TTCCCTTTTTCCCTCACTGAA/<br>AGGTGCTAAATGGACCGAGA           | TTTCAGGTCAGTTAGGAAAGCTG/<br>GATGACACAGCCAATCTCCA         | -        | -        | KU759541 | -        |
| <i>SIMLO13</i> | 833 / 853                      | GAGATGAAGATCCCATTGGT/<br>GTCGTAATAGTATCTTCGGTTTTCC       | GAAGGGTCCACTTATTGGATTAC/<br>ACAGAATAAATACTGTGTAGCATGA    | KU759545 | KU759544 | KU759542 | KU759543 |
| <i>SIMLO14</i> | 810 / 780                      | TTTGAAGTTCTGGTAGATTAGTTGG/<br>GTAATTCAGCACTCTCCAATG      | ACTACTCGTGGGTACAAAACAGTC/<br>GAAGTATCAACACCAACTTCACTTC   | KU759546 | -        | -        | -        |
| <i>SIMLO15</i> | 910 / 750                      | AATAAAGAGAGATCTTTACCCCTGA/<br>CATGCCGGAGAGTTAAGTAGTCT    | TGAGGCAATTTTATGGATCAGTAT/<br>GAAGTTTCAAAGATGGTGAAAATA    | KU759550 | KU759549 | KU759547 | KU759548 |
| <i>SIMLO16</i> | 940 / 946                      | TCGTCTGTGATTCATTCAACCT/<br>GGCCACAATTGTCTCCAACCT         | GATCCCTCAGCTTTGGATCA/<br>CCTACCAACAACCCCAAGT             | KU759551 | -        | -        | -        |

**Supplementary Table 2.** Protein sequences used for the phylogenetic analysis of Fig. 1 of this study.

| <i>Species</i>              | <i>Protein abbreviation</i> | <i>Accession number<br/>NCBI database</i> |
|-----------------------------|-----------------------------|-------------------------------------------|
| <i>Arabidopsis thaliana</i> | AtMLO1                      | AEE82203                                  |
| <i>A. thaliana</i>          | AtMLO2                      | Q9SXB6                                    |
| <i>A. thaliana</i>          | AtMLO3                      | Q94KB9                                    |
| <i>A. thaliana</i>          | AtMLO4                      | AEE28674                                  |
| <i>A. thaliana</i>          | AtMLO5                      | AEC08867                                  |
| <i>A. thaliana</i>          | AtMLO6                      | Q94KB7                                    |
| <i>A. thaliana</i>          | AtMLO7                      | AEC06624                                  |
| <i>A. thaliana</i>          | AtMLO8                      | AEC06633                                  |
| <i>A. thaliana</i>          | AtMLO9                      | AEE31927                                  |
| <i>A. thaliana</i>          | AtMLO10                     | AED98133                                  |
| <i>A. thaliana</i>          | AtMLO11                     | AED96404                                  |
| <i>A. thaliana</i>          | AtMLO12                     | AEC09645                                  |
| <i>A. thaliana</i>          | AtMLO13                     | AEE84878                                  |
| <i>A. thaliana</i>          | AtMLO14                     | AEE30722                                  |
| <i>A. thaliana</i>          | AtMLO15                     | AEC10377                                  |
| <i>Pisum sativum</i>        | PsMLO1                      | AGJ01118                                  |
| <i>Capsicum annuum</i>      | CaMLO2                      | AFH68055                                  |
| <i>Lotus japonicus</i>      | LjMLO1                      | AAX77015                                  |
| <i>Medicago truncatula</i>  | MtMLO1                      | ADV40949                                  |
| <i>Triticum aestivum</i>    | TaMLO_B1                    | AAK94904                                  |
| <i>Triticum aestivum</i>    | TaMLO_A1b                   | AAK94905                                  |
| <i>Hordeum vulgare</i>      | HvMLO                       | P93766                                    |
| <i>Oriza sativa</i>         | OsMLO2                      | AAK94907                                  |
| <i>Nicotiana tabacum</i>    | NtMLO1                      | AIT98396                                  |
| <i>Cucumis sativus</i>      | CsaMLO8                     | XP_004142393                              |
| <i>Malus domestica</i>      | MdMLO18                     | XP_008383677                              |
| <i>Malus domestica</i>      | MdMLO20                     | XP_008390437                              |
| <i>Prunus persica</i>       | PpMLO9                      | XP_007211843                              |
| <i>Prunus persica</i>       | PpMLO13                     | XP_007212960                              |
| <i>Fragaria vesca</i>       | FvMLO13                     | XP_004308899                              |
| <i>Fragaria vesca</i>       | FvMLO15                     | XP_004293900                              |

**Supplementary Table 3.** Primer pairs used for qPCR and for RNAi constructs preparation.

| Label               | Size PCR product | Fw primer sequence (5'-3')   | Rev primer sequence (5'-3') |
|---------------------|------------------|------------------------------|-----------------------------|
| L33                 | 138 bp           | GGGAAGAGGCTGGGATACATC        | AGGAGGCAAATTGGACTTGAAC      |
| Efl $\alpha$        | 120 bp           | ACAGGCGTTTCAGGTAAGGAA        | GAGGGTATTCAGCAAAGGTCTC      |
| Ubi                 | 134 bp           | GGACGGACGTACTCTAGCTGAT       | AGCTTTCGACCTCAAGGGTA        |
| Act                 | 159 bp           | GGAATAGCATAAGATGGCAGACG      | ATACCCACCATCACACCAGTAT      |
| <i>SIMLO1</i>       | 128 bp           | CTTTGGGCAGGCTAAAGATG         | AATGCCTACGTCCAACGAG         |
| <i>SIMLO2</i>       | 145 bp           | AGCTGTCAATGGCTCAAACC         | TGGAGTTGAGTTGGTCGTTT        |
| <i>SIMLO3</i>       | 93 bp            | TCAGTCCCCCAATATGGTTC         | TCAAGGGGATGAATGGTAGC        |
| <i>SIMLO4</i>       | 144 bp           | AGATGGGCTCCAACATGAAG         | AGGACCTGGACTTGCATTG         |
| <i>SIMLO5</i>       | 91 bp            | GCTTTCTTTGCTTGGAGCTG         | CCCCATGGAAAGTGTATG          |
| <i>SIMLO6</i>       | 95 bp            | TACATGGATGGCGACACAAG         | CGCCATGGAGTCTAATGATG        |
| <i>SIMLO7</i>       | 128 bp           | ATACGTCAACGGAAGCACTG         | CCATACCCACAAATCGATCC        |
| <i>SIMLO8</i>       | 108 bp           | ATTGCAAGTACGTGGCATCC         | ATCGTCAGCCGTGAAAAGTC        |
| <i>SIMLO9</i>       | 70 bp            | GGGCTGAGAAGGTGAAAAAG         | ACCGTCATTTGAACGGGTAG        |
| <i>SIMLO10</i>      | 136 bp           | AACAACACCGATGACTCGTG         | AGGAGCAGGCTTCACAAATG        |
| <i>SIMLO11</i>      | 93 bp            | ATGCCCTATTCAAGGCACTC         | TTATTGCCCTTGAGACACC         |
| <i>SIMLO12</i>      | 230 bp           | AGACACCTGAGGCTGGAGAA         | TTCCCACTCCTTCCACTCAC        |
| <i>SIMLO13</i>      | 83 bp            | CTTGTGGGGATTGAAGCAAC         | GCACAAGAACCCCTGAAATC        |
| <i>SIMLO14</i>      | 84 bp            | CTCTGCGCAAGGGTTTATC          | CTTCTTCCATCGAGCGAATC        |
| <i>SIMLO15</i>      | 128 bp           | TAACTCTCCGGCATGGATTC         | CCAAATCCATGGGCTAATTG        |
| <i>SIMLO16</i>      | 119bp            | GAGCTGGCCTTCTTTGTTTG         | CACTTCTGTGTGCCAATGCT        |
| <i>RNAi::SIMLO1</i> | 216 bp           | CACCCGTATCTTTGGGTGCCATTT     | CAGGGCGATTAAACCAGAAA        |
| <i>RNAi::SIMLO3</i> | 225 bp           | CACCAGAGTAGCAACAGCATTGAAGAAT | GTTGTCCCAATGATCAAAATC       |
| <i>RNAi::SIMLO5</i> | 226 bp           | CACCATACGGACATGGCATCAGAC     | CATGACTTCCATCATCAAAGATT     |
| <i>RNAi::SIMLO8</i> | 219 bp           | CACCCATTGAGAAAATGGCACCATAG   | ATGGTGAGCCCTCAATATCC        |
